# Supplementary material for: Tunable properties and composition of ZnO films supported on metal surfaces
Source: Royal Society of Chemistry journal article supplement (doi:10.1039/d3ta01940c), 2023-01-01
Supplement: d3ta01940c1.pdf [file d3ta01940c1.pdf]

## Supporting information

### Tunable properties and composition of ZnO films supported on metal surfaces

Yizhen Song, Paulo C. D. Mendes, Sergey M. Kozlov

Department of Chemical and Biomolecular Engineering, Faculty of Engineering, National University of Singapore, 119260, Singapore

#### Impact of the Hubbard corrections on bulk ZnO properties

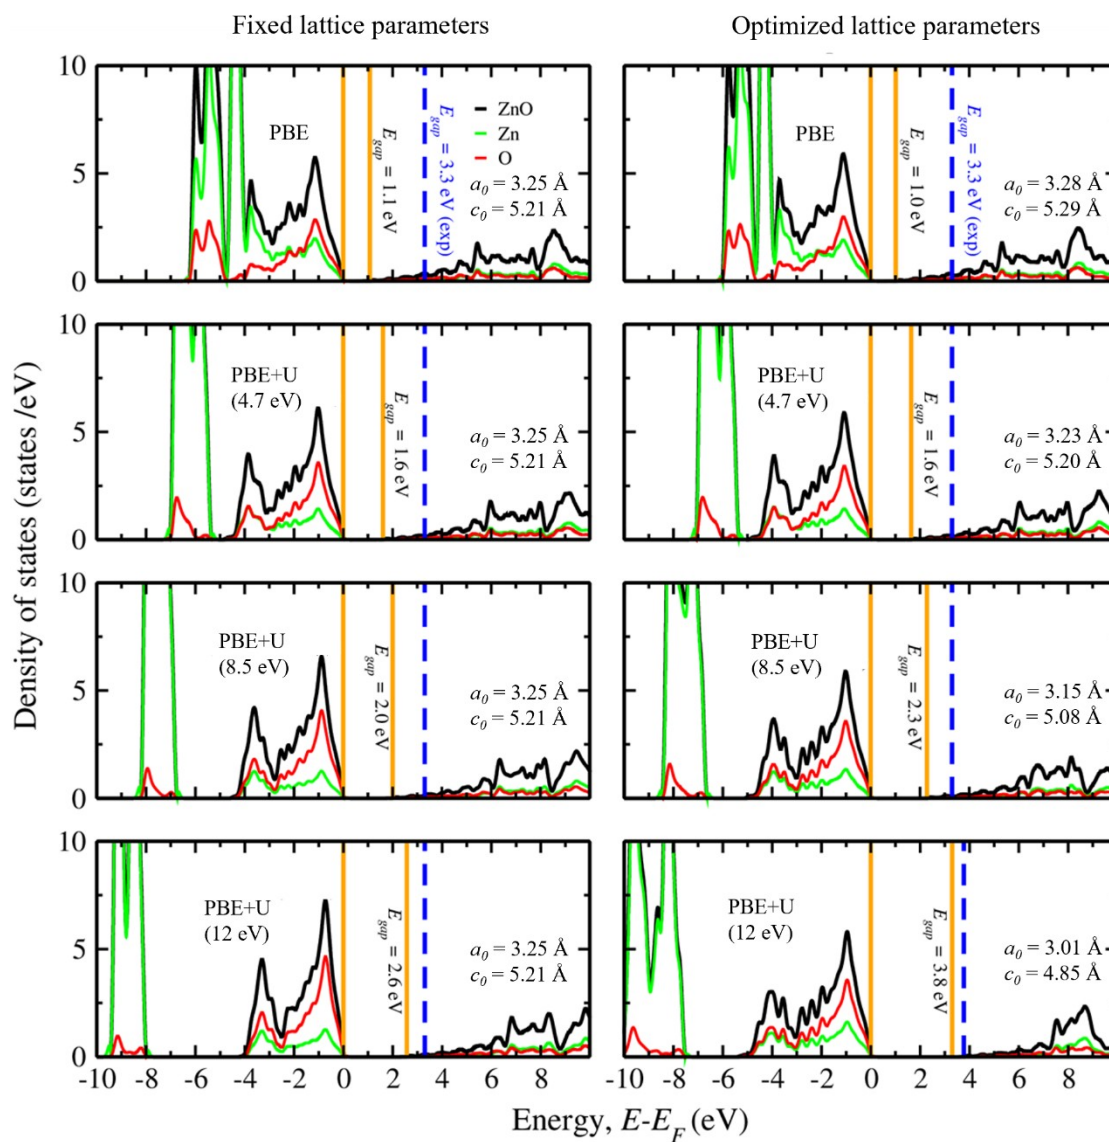

**Fig. S1.** Density of states calculated with PBE and PBE+U methods for wurtzite ZnO bulk with lattice constants fixed in the reference value of  $a_0 = 3.25$  Å,  $c_0 = 5.21$  Å (left column) and optimized to the indicated values (right column). The blue vertical dashed lines represent the experimental value of the ZnO bulk band gap<sup>1</sup> and the orange vertical lines show the calculated gap.

## Effects of the dispersion and dipole corrections on the reactivity of ZnO

We tested the effects of the zero-damping D3 vdW corrections<sup>2</sup> and the dipole corrections<sup>3</sup> to the PBE functional<sup>4</sup> on the adsorption energies of H and O vacancy formation energies in the 9/16 ZnO/Cu model (Table S1). The dispersion and dipole corrections have a negligible effect on the adsorption energy of H, and a small impact effect on the formation energy of O vacancies.

**Table S1.** Effects of dispersion (D3) and dipole corrections (DIPOLE) for 9/16 ZnO/Cu on the O vacancy formation energy,  $E_{vac}[O]$ , and adsorption energy of the H atom,  $E_{ad}[H]$ . The  $\Delta E$  shows the variation of each property with respect to the value calculated with PBE.

|                               | Method     | $E_{vac}[O]$ (eV) | $\Delta E$ (eV) |
|-------------------------------|------------|-------------------|-----------------|
| O vacancy<br>formation energy | PBE        | 2.60              | 0.00            |
|                               | PBE+D3     | 2.79              | 0.19            |
|                               | PBE+DIPOLE | 2.59              | -0.01           |
|                               | Method     | $E_{ad}[H]$ (eV)  | $\Delta E$ (eV) |
| H atom<br>adsorption energy   | PBE        | -0.69             | 0.00            |
|                               | PBE+D3     | -0.70             | -0.01           |
|                               | PBE+DIPOLE | -0.68             | 0.01            |

## Convergence tests

The convergence test with respect to the sampling of k-points is shown in Table S2. Based on our tests, the k-mesh of 3×3×1 subdivisions was selected and the sampling was transferred to cells of different sizes proportionally to the norms of the reciprocal lattice vectors, as shown in Table S3. Note that the cells in Table S3 were employed in calculations, whereas the illustrations in the article may contain equivalent cells adjusted for clearer visualization.

**Table S2.** Convergence test for the adsorption of an H atom on 9/16 ZnO/Cu(111) cell composed of 3 Cu layers with respect to the k-mesh sampling. The adsorption energy of the H atom,  $E_{ad}$ , the average distance between the two topmost Cu surface layers,  $d[Cu-Cu]$ , and between ZnO film and topmost Cu layer,  $d[ZnO-Cu]$ , are given.

| k-mesh | $E_{ad}[H]$ (eV) | $d[Cu-Cu]$ (Å) | $d[ZnO-Cu]$ (Å) |
|--------|------------------|----------------|-----------------|
| 1×1×1  | -0.50            | 2.04           | 2.43            |
| 2×2×1  | -0.58            | 2.08           | 2.54            |
| 3×3×1  | -0.66            | 2.09           | 2.55            |
| 4×4×1  | -0.69            | 2.09           | 2.54            |
| 5×5×1  | -0.63            | 2.08           | 2.55            |
| 6×6×1  | -0.66            | 2.09           | 2.55            |
| 7×7×1  | -0.68            | 2.09           | 2.55            |

**Table S3.** **k**-point samplings used in calculations of various cells based on graphitic ZnO. The lengths of the real and reciprocal surface lattice vectors, **a** and **b**, are indicated.

| ZnO/M       | <b> a </b> real, Å | <b> b </b> real, Å | <b> a </b> reciprocal, Å <sup>-1</sup> | <b> b </b> reciprocal, Å <sup>-1</sup> | <b>k</b> -sampling subdivisions |   |   |
|-------------|--------------------|--------------------|----------------------------------------|----------------------------------------|---------------------------------|---|---|
| 9/16 Cu     | 10.21              | 10.21              | 0.11                                   | 0.11                                   | 3                               | 3 | 1 |
| 32/43 Mo    | 33.48              | 17.47              | 0.06                                   | 0.11                                   | 2                               | 3 | 1 |
| 43/64 Ru    | 21.68              | 21.68              | 0.05                                   | 0.05                                   | 1                               | 1 | 1 |
| 25/36 Pd    | 16.50              | 16.50              | 0.07                                   | 0.07                                   | 2                               | 2 | 1 |
| 28/39 Pd    | 17.18              | 17.18              | 0.07                                   | 0.07                                   | 2                               | 2 | 1 |
| 25/36 Pt    | 16.63              | 16.63              | 0.07                                   | 0.07                                   | 2                               | 2 | 1 |
| 27/37 Pt    | 16.86              | 16.86              | 0.07                                   | 0.07                                   | 2                               | 2 | 1 |
| 2×2 9/16 Cu | 20.42              | 20.42              | 0.06                                   | 0.06                                   | 2                               | 2 | 1 |
| 31/52 Cu    | 18.41              | 18.41              | 0.06                                   | 0.06                                   | 2                               | 2 | 1 |
| 49/64 Ag    | 23.14              | 23.14              | 0.05                                   | 0.05                                   | 1                               | 1 | 1 |
| 31/39 Ag    | 18.06              | 18.06              | 0.06                                   | 0.06                                   | 2                               | 2 | 1 |
| 49/64 Au    | 23.08              | 23.08              | 0.05                                   | 0.05                                   | 1                               | 1 | 1 |
| 31/39 Au    | 18.02              | 18.02              | 0.06                                   | 0.06                                   | 2                               | 2 | 1 |
| 52/27 Sn    | 23.85              | 23.85              | 0.05                                   | 0.05                                   | 1                               | 1 | 1 |
| 36/31 Pb    | 19.49              | 19.49              | 0.06                                   | 0.06                                   | 2                               | 2 | 1 |

### Translations of the ZnO film on Cu(111)

We evaluated the effect of the lateral alignment of the oxide film with metal support using 49/81 ZnO/Cu supercells for *gr*-ZnO(0001) and *wz*-ZnO(0001), whereas 42/63 matching was used for *wz*-Zn(10 $\bar{1}$ 0). To obtain geometrically distinct structures, the films were translated along **a** and **b** lattice vectors by half of the maximum displacement that repeats the structure,  $L/(m \times n)$ . Here  $L$  is the length of the supercell lattice vector,  $m$  and  $n$  are the number of ZnO and Cu unit cells, composing the supercell. Four unique positions were considered, as shown in Fig. S2, the (i) as-deposited film without translation, film translated (ii) once along **a**, (iii) once along **b**, and (iv) once along each surface lattice vector. All translated structures had relative energies within 1 meV for *gr*-ZnO(0001), 4 meV for *wz*-ZnO(0001) and 37 meV for *wz*-ZnO indicating a negligible effect of translations on the film stability. Translation of the film has a similarly small effect (< 5 meV) on films with one H adsorbed or one O vacancy formed in *gr*-ZnO(0001) if the position of the considered site above the metal surface is constant.

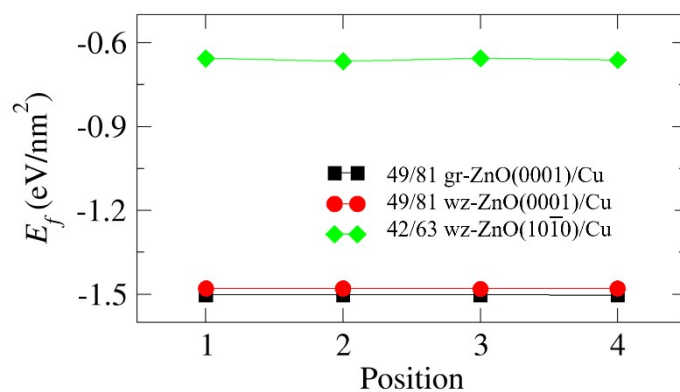

**Fig. S2.** Translations of different types of ZnO films supported on Cu(111).  $E_f$  is the formation energy of metal-supported films. Positions 1 to 4 correspond to 1 - initial arbitrary position, 2 - initial structure shifted along lattice vector  $\mathbf{b}$  once, 3 - initial structure shifted along lattice vector  $\mathbf{a}$  once, and 4 - initial structure shifted along each lattice vector once. See the discussion above for more details.

### The interaction between ZnO and Mo(110)

#### A Monolayer of ZnO on Mo surface

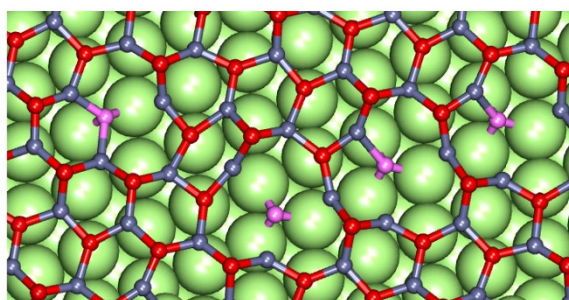

● O atom:  $d_{\text{Mo-O}} < 2.2 \text{ \AA}$

#### B 4 layers of ZnO on Mo surface

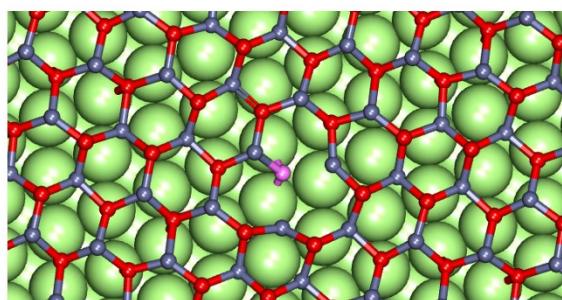

● O atom      ● Zn atom

**Fig. S3.** Top views of the interface between Mo(110) support and the gr-ZnO(0001) film with the thickness of A) 1 Monolayer and B) 4 layers. O atoms displacing towards the metal support and forming Mo-O bonds with distances  $d_{\text{Mo-O}} < 2.2 \text{ \AA}$  are displayed in pink.

## Complementary data for the geometric and electronic analyses

**Table S4.** Charge analysis for ZnO supported on metals derived from the graphitic films, as well as the rumpling defined as the height different of Zn and O planes,  $h[\text{Zn-O}]$ , and shortest O-M distances,  $d[\text{O-M}]$ . Average charges on O, Zn, and H atoms,  $Q[\text{O}]$ ,  $Q[\text{Zn}]$ ,  $Q[\text{H}]$ , as well as the charges on surface metal atoms,  $Q[\text{M}]$ . The H/ZnO/metal systems were calculated at saturation H coverages under methanol synthesis conditions.

| ZnO/M<br>(unit cells) | ZnO/metal               |                         |                          |                         | H/ZnO/metal             |                         |                          |                         |
|-----------------------|-------------------------|-------------------------|--------------------------|-------------------------|-------------------------|-------------------------|--------------------------|-------------------------|
|                       | $h[\text{Zn-O}]$<br>(Å) | $Q[\text{O}]$<br>(a.u.) | $Q[\text{Zn}]$<br>(a.u.) | $Q[\text{M}]$<br>(a.u.) | $Q[\text{H}]$<br>(a.u.) | $Q[\text{O}]$<br>(a.u.) | $Q[\text{Zn}]$<br>(a.u.) | $Q[\text{M}]$<br>(a.u.) |
| gr-ZnO                | 0.00                    | -1.18                   | 1.18                     | /                       | /                       | /                       | /                        | /                       |
| 43/64 Ru              | 0.14                    | -1.12                   | 1.08                     | -0.01                   | 0.55                    | -1.21                   | 0.83                     | -0.13                   |
| 25/36 Pd              | 0.19                    | -1.11                   | 1.14                     | -0.04                   | 0.54                    | -1.20                   | 0.93                     | -0.17                   |
| 28/39 Pd              | 0.21                    | -1.11                   | 1.14                     | -0.01                   | 0.54                    | -1.20                   | 0.93                     | -0.18                   |
| 25/36 Pt              | 0.20                    | -1.10                   | 1.15                     | -0.07                   | 0.55                    | -1.20                   | 0.99                     | -0.22                   |
| 27/37 Pt              | 0.23                    | -1.09                   | 1.15                     | -0.07                   | 0.55                    | -1.20                   | 0.99                     | -0.23                   |
| 9/16 Cu               | 0.13                    | -1.14                   | 1.10                     | 0.01                    | 0.56                    | -1.20                   | 0.88                     | -0.07                   |
| 31/52 Cu              | 0.15                    | -1.14                   | 1.12                     | 0.00                    | 0.55                    | -1.20                   | 0.88                     | -0.08                   |
| 49/64 Ag              | 0.10                    | -1.15                   | 1.13                     | 0.00                    | 0.56                    | -1.18                   | 1.02                     | -0.07                   |
| 31/39 Ag              | 0.12                    | -1.16                   | 1.14                     | 0.00                    | 0.58                    | -1.16                   | 1.11                     | -0.03                   |
| 49/64 Au              | 0.14                    | -1.13                   | 1.16                     | -0.04                   | 0.55                    | -1.20                   | 0.99                     | -0.19                   |
| 31/39 Au              | 0.16                    | -1.14                   | 1.17                     | -0.01                   | 0.56                    | -1.20                   | 1.02                     | -0.18                   |
| 52/27 Sn              | 0.07                    | -1.18                   | 1.14                     | 0.13                    | 0.58                    | -1.19                   | 1.11                     | 0.08                    |
| 36/31 Pb              | 0.05                    | -1.17                   | 1.14                     | 0.01                    | /                       | /                       | /                        | /                       |

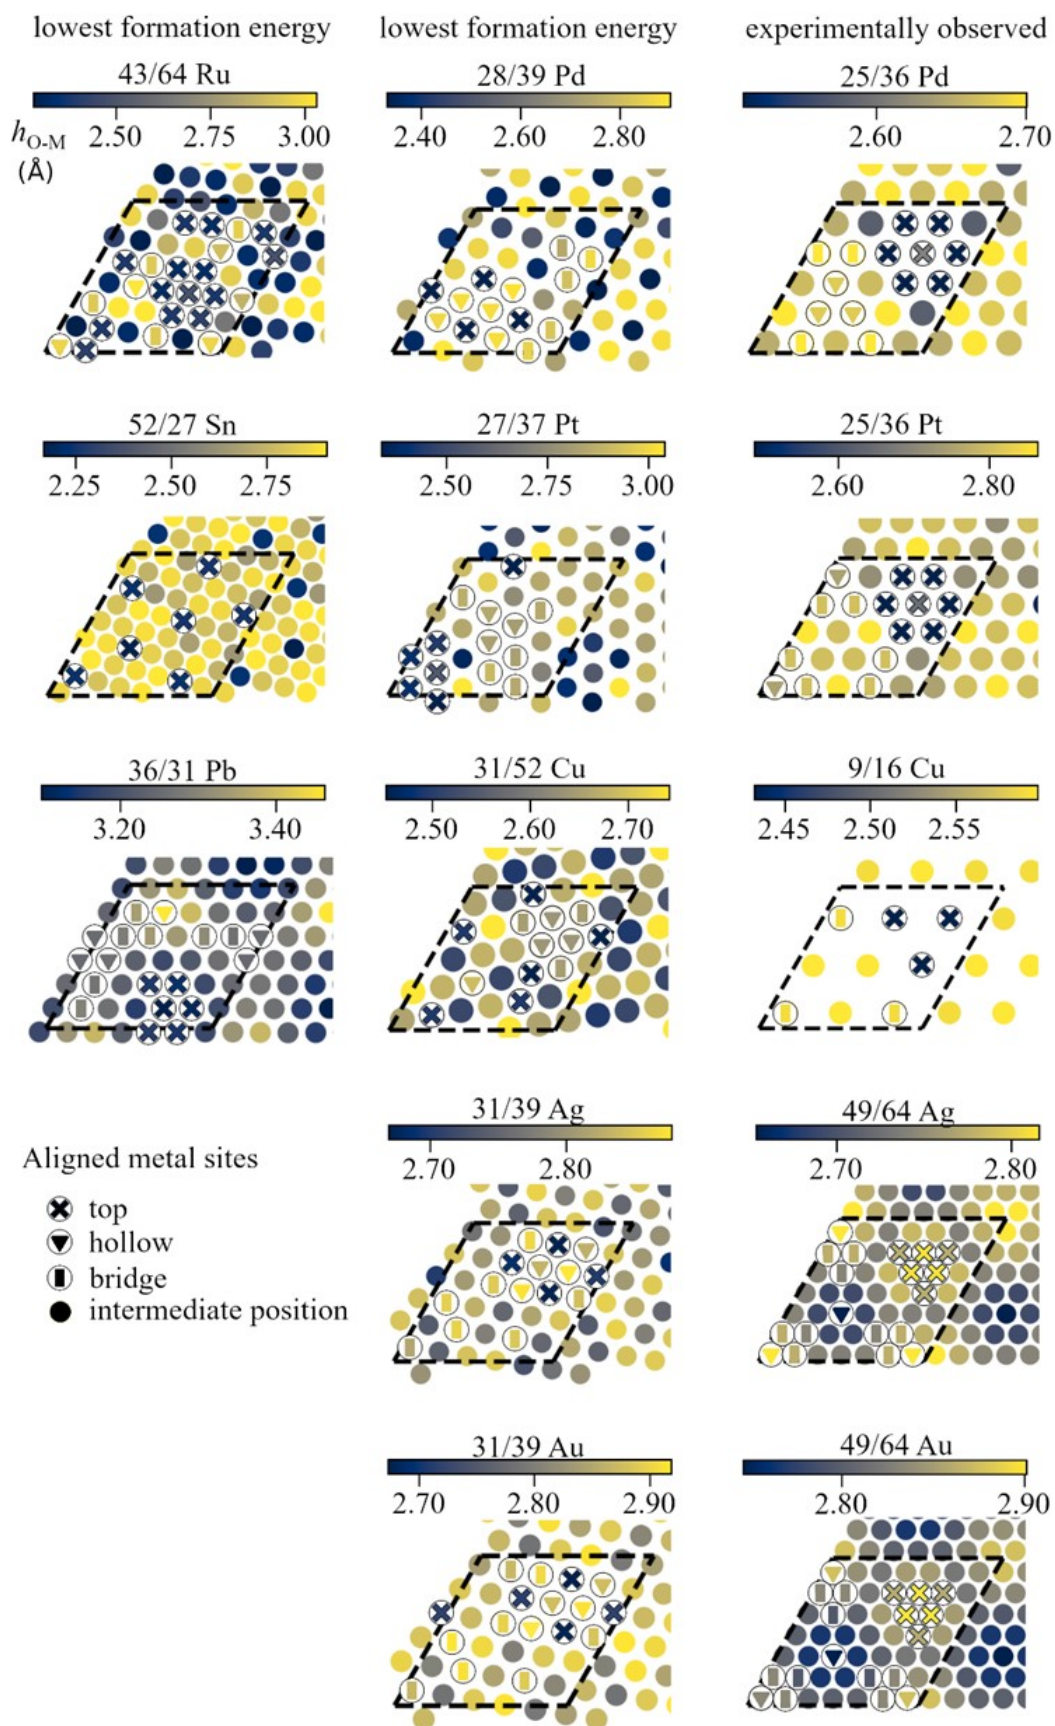

**Fig. S4.** Color maps of distances between O atoms in supported ZnO films and the planes of metal atoms. The aligned metal site is marked for selected O atoms in each unit cell. The dashed lines show the employed surface cell. The sizes of data points do not represent atomic sizes.

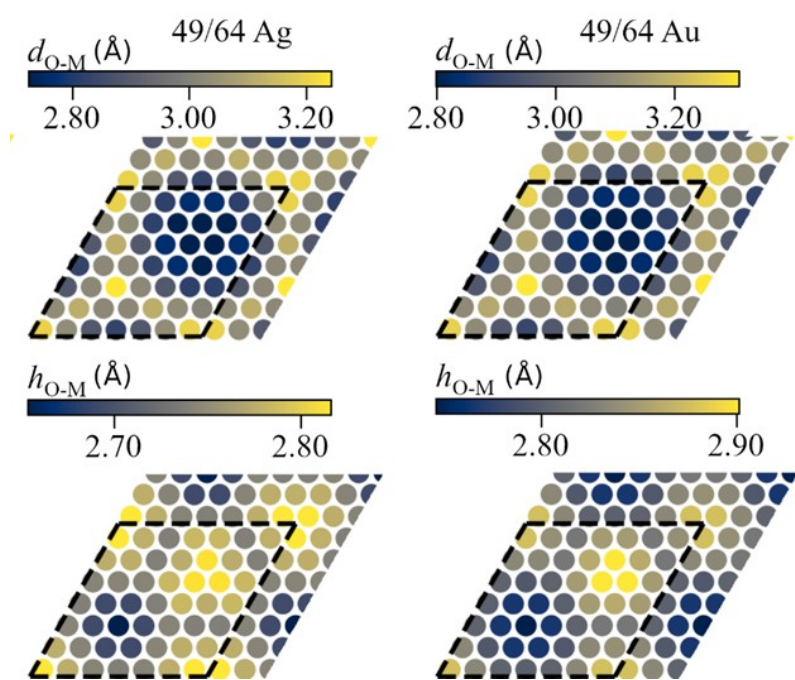

**Fig. S5.** Patterns observed for the shortest O-M distance and the distance between O atoms and the topmost metal plane for ZnO supported on Ag and Au.

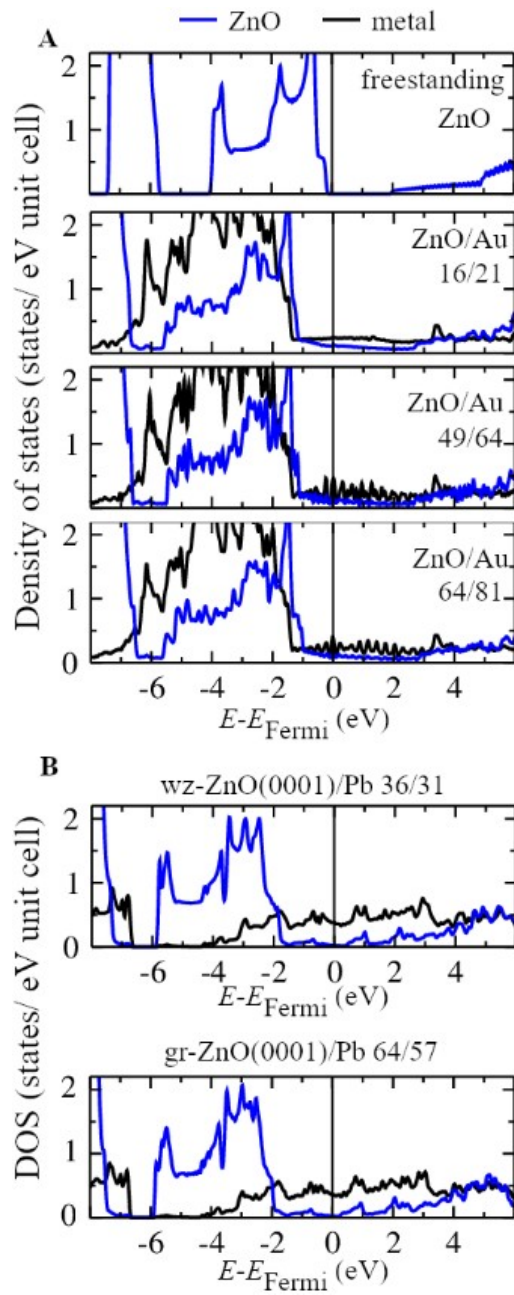

**Fig. S6.** Similarity in the local density of states projected on ZnO and surface metal atoms per ZnO unit or metal atom for **A)** various matches of gr-ZnO(0001) on Au and **B)** low-strain ZnO/Pb films.



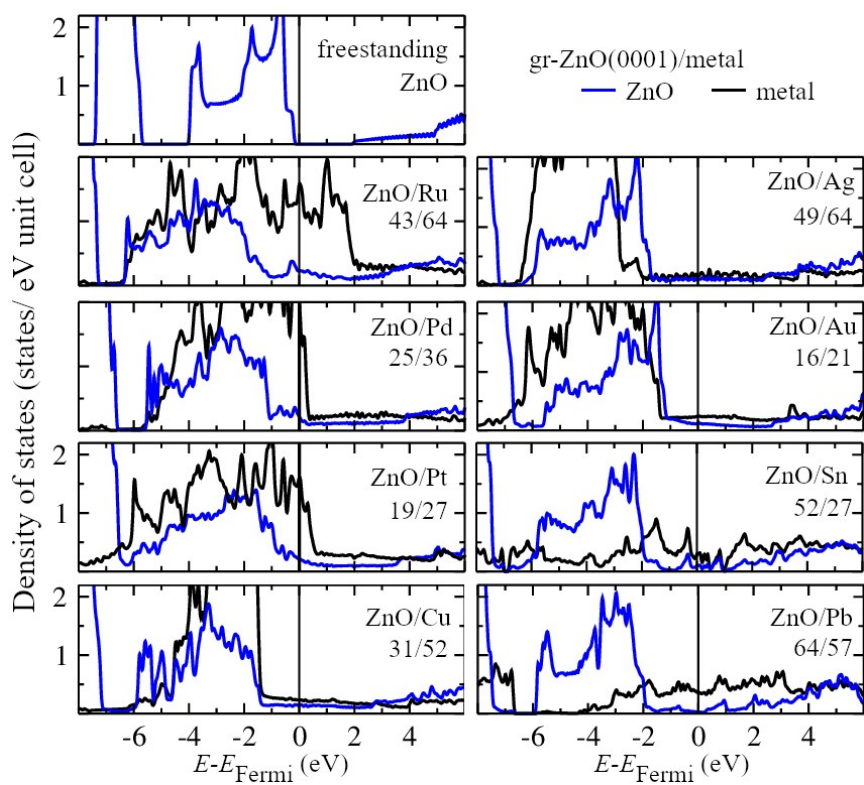

**Fig. S7.** Local density of states projected on ZnO and surface metal atoms per ZnO unit or metal atom for the freestanding graphitic ZnO(0001) monolayer and the indicated ZnO/M lattice matches corresponding to the lowest possible deformations of gr-ZnO(0001).

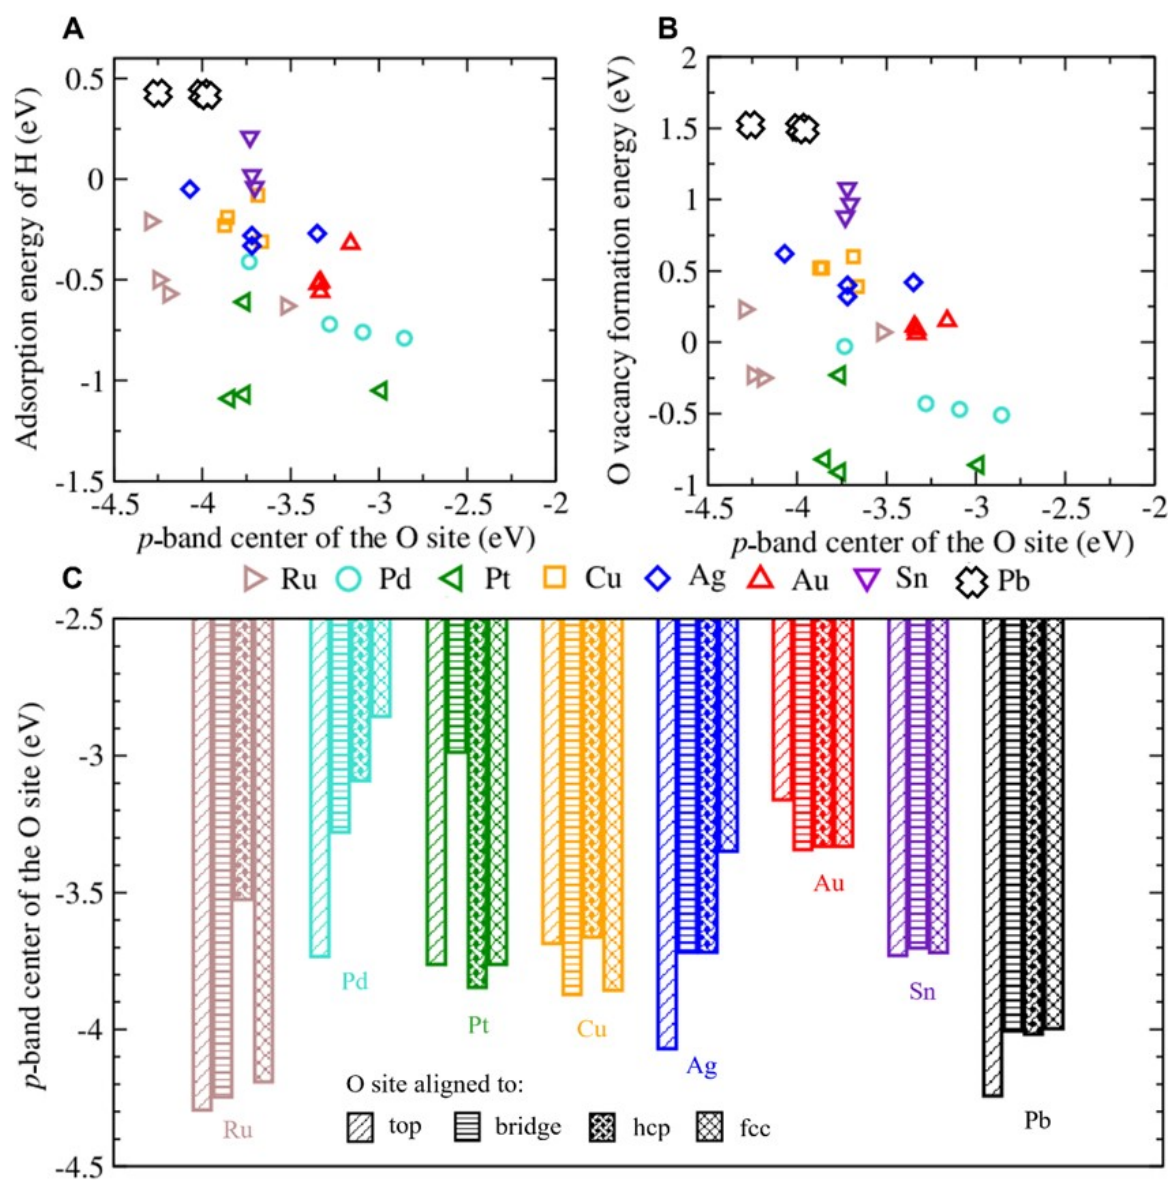

**Fig. S8.** Analyses of the supported gr-ZnO films with the lowest deformation showing the **A)** adsorption energies of H atoms (at low coverage) and **B)** O vacancy formation energies versus the  $p$ -band center of the O atoms for the O sites aligned to top, bridge, and hollow hcp and fcc sites of the metal support, and **C)** variation of the average  $p$ -band centers for O atoms aligned to these high-symmetry sites of the metal support.

**Table S5.** Work function difference of gr-ZnO(0001)/M,  $\Delta\phi$ , based on the work functions of the films supported on the metal,  $\phi^{\text{ZnO/M}}$ , and of the bare metal support,  $\phi^{\text{M}}$ .

| ZnO/M    | $\phi^{\text{M}}$ (eV) | $\phi^{\text{ZnO/M}}$ (eV) | $\Delta\phi$ (eV) |
|----------|------------------------|----------------------------|-------------------|
| gr-ZnO   | /                      | 5.7                        | /                 |
| 43/64 Ru | 4.8                    | 4.5                        | -0.3              |
| 25/36 Pd | 5.3                    | 5.1                        | -0.2              |
| 28/39 Pd | 5.3                    | 5.2                        | -0.1              |
| 25/36 Pt | 5.7                    | 5.3                        | -0.4              |
| 27/37 Pt | 5.7                    | 5.5                        | -0.2              |
| 9/16 Cu  | 4.8                    | 4.5                        | -0.3              |
| 31/52 Cu | 4.8                    | 4.6                        | -0.2              |
| 49/64 Ag | 4.7                    | 4.6                        | -0.1              |
| 31/39 Ag | 4.5                    | 4.4                        | -0.1              |
| 49/64 Au | 5.2                    | 5.1                        | -0.1              |
| 31/39 Au | 5.2                    | 5.1                        | -0.1              |
| 52/27 Sn | 4.3                    | 4.2                        | -0.1              |
| 36/31 Pb | 3.8                    | 4.0                        | 0.2               |

Formation of O vacancies and adsorption of H, O, and OH at various conditions

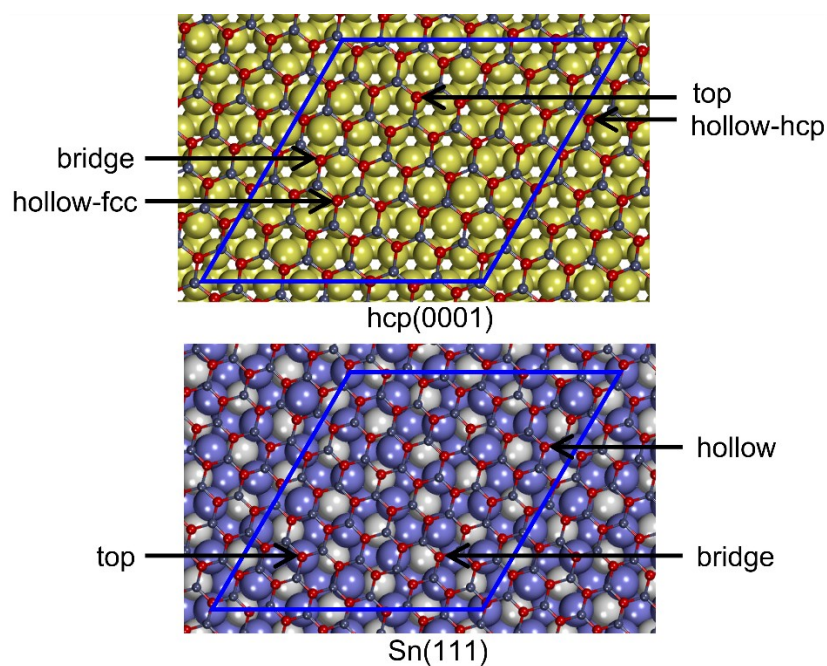

**Fig. S9.** Classification of O atoms in ZnO films above various sites of non-fcc metal surfaces. The Sn layer positioned below the topmost atoms of the Sn(111) surface is displayed in white for clarity. The same classification was employed to distinguish Zn sites and sites at the centers of the graphitic ZnO rings.

**Table S6.** Gibbs adsorption energies of single H atoms on O sites of ZnO,  $G_{ad}[H]$ , and film formation Gibbs free energies under typical hydrogenation conditions of methanol synthesis ( $T = 525$  K,  $p[H_2] = 1500000$  Pa,  $p[H_2O] = 50000$  Pa) for metal-supported ZnO. The top, bridge, hcp and fcc refer to the alignment of the O site above various sites on the metal support. The equilibrium concentrations,  $\theta$ , of H atoms per total number of O sites under these conditions are also given.

| ZnO/M<br>(unit cells) | $G_{ad}[H]$ (eV) |        |                |       | $\theta$           | $G_f^{**}$ (eV/nm <sup>2</sup> ) |
|-----------------------|------------------|--------|----------------|-------|--------------------|----------------------------------|
|                       | top              | bridge | hcp            | fcc   | [H <sub>ad</sub> ] |                                  |
| ZnO monolayer         | 1.15             |        |                |       | 0                  | 4.89                             |
| wz-(1010) 4-layer     | 0.12             |        |                |       | 0                  | 2.01                             |
| 43/64 Ru              | -0.21            | -0.50  | -0.63          | -0.57 | 1                  | -8.64                            |
| 25/36 Pd              | -0.41            | -0.72  | -0.76          | -0.79 | 1                  | -10.52                           |
| 28/39 Pd              | -0.54            | -0.69  | -0.66          | -0.68 | 1                  | -10.49                           |
| 25/36 Pt              | -0.60            | -1.05  | -1.12          | -1.14 | 1                  | -11.35                           |
| 27/37 Pt              | -0.74            | -0.98  | -1.04          | -1.08 | 1                  | -12.32                           |
| 2x2 9/16 Cu           | -0.21            | -0.38  | -0.30          | -0.38 | 0.83               | -1.92                            |
| 31/52 Cu              | -0.08            | -0.23  | -0.31          | -0.19 | 0.84               | -3.17                            |
| 49/64 Ag              | -0.05            | -0.28  | -0.33          | -0.27 | 0.47               | -2.08                            |
| 31/39 Ag              | 0.00             | -0.03  | -0.04          | -0.04 | 0.13               | -2.21                            |
| 49/64 Au              | -0.37            | -0.67  | -0.71          | -0.64 | 0.94               | -5.15                            |
| 31/39 Au              | -0.56            | -0.62  | -0.63          | -0.64 | 0.77               | -5.29                            |
| 52/27 Sn              | 0.21             | -0.04  | / <sup>a</sup> | 0.02  | 0.10               | 1.62                             |
| 36/31 Pb              | 0.58             | 0.45   | 0.45           | 0.49  | 0                  | 1.41                             |

<sup>a</sup> "/" in the table indicates that adsorption on this site is not locally stable

**Table S7.** Gibbs formation energies of one O vacancy,  $G_{vac}[O]$ , under ambient conditions ( $T = 298.15$  K,  $p[O_2] = 20612.2$  Pa,  $p[H_2O] = 3171.5$  Pa), and typical hydrogenation conditions of methanol synthesis ( $T = 525$  K,  $p[H_2] = 1500000$  Pa,  $p[H_2O] = 50000$  Pa), and CO oxidation conditions ( $T = 450$  K,  $p[O_2] = 5000$  Pa) for metal-supported ZnO. The top, bridge, and hollow (hcp, fcc) refer to the alignment of the O site above various sites on the metal support. The equilibrium concentrations,  $\theta$ , of O vacancies per total number of O sites under hydrogenation conditions are also given.

| Equation:             | ambient conditions                         |        |                |      | CO oxidation condition |        |      |      | typical hydrogenation conditions |                                                |       |       |                     |  |
|-----------------------|--------------------------------------------|--------|----------------|------|------------------------|--------|------|------|----------------------------------|------------------------------------------------|-------|-------|---------------------|--|
|                       | $Zn_xO_x \rightarrow 0.5O_2 + Zn_xO_{x-1}$ |        |                |      |                        |        |      |      |                                  | $Zn_xO_x + H_2 \rightarrow H_2O + Zn_xO_{x-1}$ |       |       |                     |  |
|                       | $G_{vac}[O]$ (eV)                          |        |                |      | $G_{vac}[O]$ (eV)      |        |      |      | $G_{vac}[O]$ (eV)                |                                                |       |       | $\theta$            |  |
| ZnO/M<br>(unit cells) | top                                        | bridge | hcp            | fcc  | top                    | bridge | hcp  | fcc  | top                              | bridge                                         | hcp   | fcc   | [O <sub>vac</sub> ] |  |
| ZnO monolayer         | 4.03                                       |        |                |      | 3.85                   |        |      |      | 1.62                             |                                                |       |       | 0                   |  |
| wz-(1010) 4-layer     | 3.18                                       |        |                |      | 3.00                   |        |      |      | 0.77                             |                                                |       |       | 0                   |  |
| 43/64 Ru              | 2.63                                       | 2.18   | 2.48           | 2.16 | 2.46                   | 2.00   | 2.30 | 1.98 | 0.23                             | -0.23                                          | 0.07  | -0.25 | 0.19                |  |
| 25/36 Pd              | 2.38                                       | 1.97   | 1.93           | 1.89 | 2.20                   | 1.80   | 1.76 | 1.72 | -0.03                            | -0.43                                          | -0.47 | -0.51 | breaks              |  |
| 28/39 Pd              | 2.22                                       | 2.15   | 2.30           | 2.27 | 2.05                   | 1.98   | 2.13 | 2.10 | -0.19                            | -0.26                                          | -0.11 | -0.14 | 0.14                |  |
| 25/36 Pt              | 2.17                                       | 1.43   | 1.46           | 1.40 | 2.00                   | 1.25   | 1.28 | 1.22 | -0.23                            | -0.98                                          | -0.95 | -1.01 | breaks              |  |
| 27/37 Pt              | 1.93                                       | 1.63   | 1.70           | 1.62 | 1.76                   | 1.45   | 1.53 | 1.45 | -0.49                            | -0.79                                          | -0.71 | -0.80 | breaks              |  |
| 2x2 9/16 Cu           | 2.62                                       | 2.52   | 2.50           | 2.52 | 2.45                   | 2.35   | 2.33 | 2.35 | 0.22                             | 0.12                                           | 0.10  | 0.12  | 0                   |  |
| 31/52 Cu              | 3.01                                       | 2.93   | 2.80           | 2.92 | 2.84                   | 2.76   | 2.63 | 2.75 | 0.61                             | 0.53                                           | 0.40  | 0.52  | 0                   |  |
| 49/64 Ag              | 3.02                                       | 2.80   | 2.73           | 2.82 | 2.85                   | 2.63   | 2.55 | 2.65 | 0.62                             | 0.40                                           | 0.32  | 0.42  | 0                   |  |
| 31/39 Ag              | 3.15                                       | 3.30   | 3.33           | 3.34 | 2.98                   | 3.13   | 3.16 | 3.17 | 0.78                             | 0.89                                           | 0.92  | 0.93  | 0                   |  |
| 49/64 Au              | 2.42                                       | 2.24   | 2.18           | 2.26 | 2.25                   | 2.06   | 2.01 | 2.08 | 0.02                             | -0.17                                          | -0.22 | -0.15 | 0.08                |  |
| 31/39 Au              | 2.35                                       | 2.41   | 2.40           | 2.44 | 2.18                   | 2.34   | 2.23 | 2.27 | -0.06                            | 0.00                                           | -0.01 | 0.03  | 0.03                |  |
| 52/27 Sn              | 3.28                                       | 3.28   | / <sup>a</sup> | 3.49 | 3.11                   | 3.20   | /    | 3.31 | 0.88                             | 0.97                                           | /     | 1.08  | 0                   |  |
| 36/31 Pb              | 3.65                                       | 4.57   | 3.54           | 3.60 | 3.48                   | 3.40   | 3.37 | 3.43 | 1.25                             | 1.17                                           | 1.14  | 1.20  | 0                   |  |

<sup>a</sup> "/" in the table indicates that adsorption on this site is not locally stable

The formation energy of one OH vacancy in metal-supported hydrogenated ZnO films and the adsorption energies of O and OH for films containing one O vacancy at the most favourable site are shown in Table S8. The energies of OH species abstraction from the surface under hydrogenation conditions were calculated as

$$G_{\text{vac}}[\text{OH}] = E[\text{H}_{k-1}/\text{Zn}_x\text{O}_{x-1}/\text{M}] + G[\text{H}_2\text{O}] - G[\text{H}_k/\text{Zn}_x\text{O}_x/\text{M}] - 0.5 * G[\text{H}_2]$$

where k is the number of H atoms in the hydrogenated film in which the OH vacancies were created. The OH removal energies were calculated for the most stable sites for O vacancy formation.

**Table S8.** Gibbs OH vacancy formation energies for the saturated hydrogenated ZnO films on metals,  $G_{\text{vac}}[\text{OH}]$ , and Gibbs adsorption energy of one O,  $G_{\text{ad}}[\text{O}]$ , and one OH atom,  $G_{\text{ad}}[\text{OH}]$  for metal-supported ZnO with an O vacancy under methanol synthesis conditions,  $T = 525 \text{ K}$ ,  $p[\text{H}_2] = 1.5 \text{ MPa}$ ,  $p[\text{H}_2\text{O}] = 0.05 \text{ MPa}$ .

| ZnO/M<br>(unit cells) | From hydrogenated ZnO            |  | For ZnO with one O vacancy     |                                 |
|-----------------------|----------------------------------|--|--------------------------------|---------------------------------|
|                       | $G_{\text{vac}}[\text{OH}]$ (eV) |  | $G_{\text{ad}}[\text{O}]$ (eV) | $G_{\text{ad}}[\text{OH}]$ (eV) |
| 43/64 Ru              | 0.24                             |  | 0.42                           | -0.10                           |
| 25/36 Pd              | 0.72                             |  | 0.63                           | -0.17                           |
| 25/36 Pt              | 0.78                             |  | 1.12                           | 0.07                            |
| 27/37 Pt              | 0.81                             |  | 0.78                           | -0.32                           |
| 2x2 9/16 Cu           | 0.95                             |  | /                              | /                               |
| 31/52 Cu              | 0.94                             |  | /                              | /                               |
| 49/64 Ag              | 0.63                             |  | /                              | /                               |
| 49/64 Au              | 0.59                             |  | 0.46                           | -0.18                           |
| 31/39 Au              | 0.85                             |  | 0.05                           | -0.53                           |
| 52/27 Sn              | 0.87                             |  | /                              | /                               |
| 36/31 Pb              | /                                |  | /                              | /                               |

**Table S9.** Gibbs adsorption energies of one O atom above the centers of ZnO rings,  $G_{\text{ad}}[\text{O}]$  under ambient conditions ( $T = 298.15 \text{ K}$ ,  $p[\text{O}_2] = 20612.2 \text{ Pa}$ ,  $p[\text{H}_2\text{O}] = 3171.5 \text{ Pa}$ ), and typical hydrogenation conditions of methanol synthesis ( $T = 525 \text{ K}$ ,  $p[\text{H}_2] = 1500000 \text{ Pa}$ ,  $p[\text{H}_2\text{O}] = 50000 \text{ Pa}$ ), and CO oxidation conditions ( $T = 450 \text{ K}$ ,  $p[\text{O}_2] = 5000 \text{ Pa}$ ) for metal-supported ZnO. The top, bridge, and hollow (hcp, fcc) refer to the alignment of the center of ZnO rings above various sites on the metal support.

| Equation:<br>ZnO/M<br>(unit cells) | ambient conditions                                                            |        |                |       | CO oxidation condition                                                                          |        |       |       | typical hydrogenation conditions                                                                |        |      |      |
|------------------------------------|-------------------------------------------------------------------------------|--------|----------------|-------|-------------------------------------------------------------------------------------------------|--------|-------|-------|-------------------------------------------------------------------------------------------------|--------|------|------|
|                                    | $\text{Zn}_x\text{O}_x + 0.5\text{O}_2 \rightarrow \text{Zn}_x\text{O}_{x+1}$ |        |                |       | $\text{Zn}_x\text{O}_x + \text{H}_2\text{O} \rightarrow \text{Zn}_x\text{O}_{x+1} + \text{H}_2$ |        |       |       | $\text{Zn}_x\text{O}_x + \text{H}_2\text{O} \rightarrow \text{Zn}_x\text{O}_{x+1} + \text{H}_2$ |        |      |      |
|                                    | $G_{\text{ad}}[\text{O}]$ (eV)                                                |        |                |       | $G_{\text{ad}}[\text{O}]$ (eV)                                                                  |        |       |       | $G_{\text{ad}}[\text{O}]$ (eV)                                                                  |        |      |      |
|                                    | top                                                                           | bridge | hcp            | fcc   | top                                                                                             | bridge | hcp   | fcc   | top                                                                                             | bridge | hcp  | fcc  |
| ZnO monolayer                      | 3.43                                                                          |        |                |       | 3.62                                                                                            |        |       |       | 5.87                                                                                            |        |      |      |
| wz-(1010) 4-layer                  | 1.18                                                                          |        |                |       | 1.36                                                                                            |        |       |       | 3.59                                                                                            |        |      |      |
| 43/64 Ru                           | X <sup>a</sup>                                                                | X      | X              | X     | X                                                                                               | X      | X     | X     | X                                                                                               | X      | X    | X    |
| 25/36 Pd                           | 0.32                                                                          | 0.37   | 0.21           | 0.55  | 0.50                                                                                            | 0.55   | 0.39  | 0.73  | 2.74                                                                                            | 2.78   | 2.63 | 2.96 |
| 28/39 Pd                           | X                                                                             | 0.24   | 0.32           | 0.46  | X                                                                                               | 0.42   | 0.49  | 0.64  | X                                                                                               | 2.66   | 2.73 | 2.87 |
| 25/36 Pt                           | X                                                                             | 0.19   | 0.11           | 0.70  | X                                                                                               | 0.37   | 0.29  | 0.87  | X                                                                                               | 2.61   | 2.53 | 3.11 |
| 27/37 Pt                           | 0.27                                                                          | -0.17  | -0.21          | 0.44  | 0.45                                                                                            | 0.01   | -0.03 | 0.61  | 2.69                                                                                            | 2.45   | 2.21 | 2.85 |
| 2x2 9/16 Cu                        | -0.84                                                                         | X      | -0.40          | -0.56 | -0.66                                                                                           | X      | -0.22 | -0.38 | 1.57                                                                                            | X      | 2.02 | 1.86 |
| 31/52 Cu                           | -0.76                                                                         | -0.73  | -0.76          | -0.65 | -0.58                                                                                           | -0.54  | -0.57 | -0.47 | 1.66                                                                                            | 1.69   | 1.66 | 1.77 |
| 49/64 Ag                           | X                                                                             | -0.26  | -0.39          | -0.12 | X                                                                                               | -0.08  | -0.21 | 0.06  | X                                                                                               | 2.15   | 2.03 | 2.30 |
| 31/39 Ag                           | -0.60                                                                         | -0.54  | -0.54          | -0.52 | -0.42                                                                                           | -0.36  | -0.36 | -0.34 | 1.81                                                                                            | 1.88   | 1.88 | 1.90 |
| 49/64 Au                           | 1.09                                                                          | 0.56   | 0.46           | X     | 1.27                                                                                            | 0.74   | 0.64  | X     | 3.50                                                                                            | 2.97   | 2.87 | X    |
| 31/39 Au                           | 0.71                                                                          | 0.69   | 0.79           | 0.64  | 0.89                                                                                            | 0.97   | 0.97  | 0.82  | 3.13                                                                                            | 3.10   | 3.20 | 3.05 |
| 52/27 Sn                           | X                                                                             | X      | / <sup>b</sup> | -1.34 | X                                                                                               | X      | /     | -1.16 | X                                                                                               | X      | /    | 1.07 |
| 36/31 Pb                           | -0.61                                                                         | -0.96  | -1.11          | -0.68 | -0.43                                                                                           | -0.78  | -0.93 | -0.50 | 1.80                                                                                            | 1.46   | 1.31 | 1.74 |

<sup>a</sup> "X" in the table indicates that O adsorption at this site makes some O in the ZnO film move to the metal surface; <sup>b</sup> "/" in the table indicates that adsorption on this site is not locally stable.

**Table S10.** Gibbs adsorption energies of one OH moiety above the centers of ZnO rings,  $G_{ad}[\text{OH}]$  under ambient conditions ( $T = 298.15 \text{ K}$ ,  $p[\text{O}_2] = 20612.2 \text{ Pa}$ ,  $p[\text{H}_2\text{O}] = 3171.5 \text{ Pa}$ ), and typical hydrogenation conditions of methanol synthesis ( $T = 525 \text{ K}$ ,  $p[\text{H}_2] = 1500000 \text{ Pa}$ ,  $p[\text{H}_2\text{O}] = 50000 \text{ Pa}$ ) for metal-supported ZnO. The top, bridge, and hollow (hcp, fcc) refer to the alignment of the center of ZnO rings above the metal support.

|                       | ambient conditions                                                                     |                |                |       | typical hydrogenation conditions                                                   |        |      |      |
|-----------------------|----------------------------------------------------------------------------------------|----------------|----------------|-------|------------------------------------------------------------------------------------|--------|------|------|
| Equation:             | $\text{ZnO} + 0.5\text{H}_2\text{O} + 0.25\text{O}_2 \rightarrow \text{OH}/\text{ZnO}$ |                |                |       | $\text{ZnO} + \text{H}_2\text{O} \rightarrow \text{OH}/\text{ZnO} + 0.5\text{H}_2$ |        |      |      |
| ZnO/M<br>(unit cells) | $G_{ad}[\text{OH}]$ (eV)                                                               |                |                |       | $G_{ad}[\text{OH}]$ (eV)                                                           |        |      |      |
|                       | top                                                                                    | bridge         | hcp            | fcc   | top                                                                                | bridge | hcp  | fcc  |
| ZnO monolayer         | 1.34                                                                                   |                |                |       | 2.56                                                                               |        |      |      |
| wz-(1010) 4-layer     | 0.44                                                                                   |                |                |       | 1.79                                                                               |        |      |      |
| 43/64 Ru              | -0.71                                                                                  | X <sup>a</sup> | X              | -0.77 | 0.63                                                                               | X      | X    | 0.57 |
| 25/36 Pd              | -0.03                                                                                  | -0.22          | -0.28          | -0.18 | 1.32                                                                               | 1.13   | 1.07 | 1.17 |
| 28/39 Pd              | -0.26                                                                                  | -0.17          | -0.21          | X     | 1.10                                                                               | 1.18   | 1.14 | X    |
| 25/36 Pt              | X                                                                                      | -0.39          | -0.42          | 0.20  | X                                                                                  | 0.95   | 0.92 | 1.54 |
| 27/37 Pt              | X                                                                                      | X              | -0.60          | X     | X                                                                                  | X      | 0.73 | X    |
| 2x2 9/16 Cu           | -0.45                                                                                  | -0.50          | -0.52          | -0.56 | 0.90                                                                               | 0.86   | 0.83 | 0.80 |
| 31/52 Cu              | -0.61                                                                                  | -0.73          | -0.68          | -0.74 | 0.74                                                                               | 0.62   | 0.68 | 0.62 |
| 49/64 Ag              | -0.42                                                                                  | -0.50          | -0.63          | -0.34 | 0.94                                                                               | 0.85   | 0.72 | 1.01 |
| 31/39 Ag              | -0.73                                                                                  | -0.71          | -0.68          | -0.72 | 0.63                                                                               | 0.64   | 0.67 | 0.63 |
| 49/64 Au              | 0.33                                                                                   | 0.00           | -0.15          | 0.35  | 1.67                                                                               | 1.36   | 1.20 | 1.71 |
| 31/39 Au              | 0.12                                                                                   | 0.04           | 0.13           | -0.02 | 1.46                                                                               | 1.39   | 1.49 | 1.33 |
| 52/27 Sn              | -1.39                                                                                  | -0.96          | / <sup>b</sup> | -1.02 | -0.04                                                                              | 0.39   | /    | 0.33 |
| 36/31 Pb              | -0.67                                                                                  | -0.94          | -1.08          | -0.70 | 0.67                                                                               | 0.41   | 0.27 | 0.64 |

<sup>a</sup> "X" in the table indicates that O adsorption at this site makes some O in the ZnO film move to the metal surface; <sup>b</sup> "/" in the table indicates that adsorption on this site is not locally stable

## References

- 1 G. Barcaro, I. O. Thomas and A. Fortunelli, *J. Chem. Phys.*, 2010, **132**, 124703.
- 2 S. Grimme, J. Antony, S. Ehrlich and H. Krieg, *J. Chem. Phys.*, 2010, **132**, 154104.
- 3 J. Neugebauer and M. Scheffler, 1992, **46**, 16067–16080.
- 4 J. P. Perdew, K. Burke and M. Ernzerhof, 1996, **77**, 3865–3868.

## Structure files of ZnO films on metal surfaces

In this section, the optimized structures of all ZnO/M are provided in XYZ format and accompanied by the matrix of the employed periodic cell dimensions.

### Graphitic ZnO on metals

#### 43/64 Ru

```
-21.679999999999997 0.000000000000000 0.000000000000000
10.839999999999999 -18.7754307539999985 0.000000000000000
0.000000000000000 0.000000000000000 19.719999999999989
Ru -8.129999998915903 -17.210811525125902 5.49999999715942
Ru -17.614999998915902 -0.782309615375904 5.49999999715942
Ru -5.419999998915904 -17.210811525125902 5.49999999715942
Ru -16.259999998915902 -3.129238459625904 5.49999999715942
Ru -14.904999998915903 -0.782309615375904 5.49999999715942
Ru -2.709999998915904 -17.210811525125902 5.49999999715942
Ru -14.904999998915901 -5.476167303875904 5.49999999715942
Ru -13.549999998915903 -3.129238459625904 5.49999999715942
Ru -12.194999998915904 -0.782309615375904 5.49999999715942
Ru 0.000000001084098 -17.210811525125902 5.49999999715942
Ru -13.549999998915901 -7.823096148125904 5.49999999715942
Ru -12.194999998915902 -5.476167303875904 5.49999999715942
Ru -10.839999998915903 -3.129238459625904 5.49999999715942
Ru -9.484999998915901 -0.782309615375904 5.49999999715942
Ru 2.710000001084097 -17.210811525125902 5.49999999715942
Ru -12.194999998915902 -10.170024992375902 5.49999999715942
Ru -10.839999998915903 -7.823096148125904 5.49999999715942
Ru -9.484999998915903 -5.476167303875904 5.49999999715942
Ru -8.129999998915901 -3.129238459625904 5.49999999715942
Ru -6.774999998915902 -0.782309615375904 5.49999999715942
Ru 5.420000001084096 -17.210811525125902 5.49999999715942
Ru -10.839999998915903 -12.516953836625902 5.49999999715942
Ru -9.484999998915903 -10.170024992375902 5.49999999715942
Ru -8.129999998915903 -7.823096148125904 5.49999999715942
Ru -6.774999998915900 -5.476167303875904 5.49999999715942
Ru -5.419999998915902 -3.129238459625904 5.49999999715942
Ru -4.064999998915903 -0.782309615375904 5.49999999715942
Ru 8.130000001084097 -17.210811525125902 5.49999999715942
Ru -9.484999998915903 -14.863882680875902 5.49999999715942
Ru -8.129999998915903 -12.516953836625902 5.49999999715942
Ru -6.774999998915904 -10.170024992375902 5.49999999715942
Ru -5.419999998915901 -7.823096148125904 5.49999999715942
Ru -4.064999998915901 -5.476167303875904 5.49999999715942
Ru -2.709999998915903 -3.129238459625904 5.49999999715942
Ru -1.354999998915902 -0.782309615375904 5.49999999715942
Ru -10.839999998915903 -17.210811525125902 5.49999999715942
Ru -6.774999998915904 -14.863882680875902 5.49999999715942
Ru -5.419999998915904 -12.516953836625902 5.49999999715942
Ru -4.064999998915901 -10.170024992375902 5.49999999715942
Ru -2.709999998915902 -7.823096148125904 5.49999999715942
Ru -1.354999998915903 -5.476167303875904 5.49999999715942
Ru 0.000000001084098 -3.129238459625904 5.49999999715942
Ru -20.324999998915903 -0.782309615375904 5.49999999715942
Ru -4.064999998915905 -14.863882680875902 5.49999999715942
Ru -2.709999998915902 -12.516953836625902 5.49999999715942
Ru -1.354999998915902 -10.170024992375902 5.49999999715942
Ru 0.000000001084097 -7.823096148125904 5.49999999715942
Ru 1.355000001084098 -5.476167303875904 5.49999999715942
Ru -18.969999998915902 -3.129238459625904 5.49999999715942
Ru -1.354999998915902 -14.863882680875902 5.49999999715942
Ru 0.000000001084097 -12.516953836625902 5.49999999715942
Ru 1.355000001084097 -10.170024992375902 5.49999999715942
Ru 2.710000001084098 -7.823096148125904 5.49999999715942
```

|    |                     |                     |                   |
|----|---------------------|---------------------|-------------------|
| Ru | -17.614999998915902 | -5.476167303875904  | 5.499999999715942 |
| Ru | 1.355000001084097   | -14.863882680875902 | 5.499999999715942 |
| Ru | 2.710000001084096   | -12.516953836625902 | 5.499999999715942 |
| Ru | 4.065000001084098   | -10.170024992375902 | 5.499999999715942 |
| Ru | -16.259999998915902 | -7.823096148125904  | 5.499999999715942 |
| Ru | 4.065000001084096   | -14.863882680875902 | 5.499999999715942 |
| Ru | 5.420000001084097   | -12.516953836625902 | 5.499999999715942 |
| Ru | -14.904999998915903 | -10.170024992375902 | 5.499999999715942 |
| Ru | 6.775000001084097   | -14.863882680875902 | 5.499999999715942 |
| Ru | -13.549999998915904 | -12.516953836625902 | 5.499999999715942 |
| Ru | -12.194999998915904 | -14.863882680875902 | 5.499999999715942 |
| Ru | -18.972589039879278 | 0.000846320454145   | 7.545383758925984 |
| Ru | -17.619383662600548 | -2.358734116412478  | 7.559216325437735 |
| Ru | -16.279433586769187 | -0.000087621657263  | 7.526690390827774 |
| Ru | -16.266991219203256 | -4.711801313039359  | 7.575121055307608 |
| Ru | -14.913484609640056 | -2.369970841322084  | 7.532597554740348 |
| Ru | -13.539157138997709 | -0.000786494834802  | 7.514149953349094 |
| Ru | -14.917669626404392 | -7.043780250048000  | 7.568620674659412 |
| Ru | -13.560315748285500 | -4.710350693703994  | 7.543731584268067 |
| Ru | -12.181587177865291 | -2.350948554053566  | 7.541340726881407 |
| Ru | -10.815905726368118 | 0.006937520000958   | 7.555674519372495 |
| Ru | -13.553225240261618 | -9.374089677393151  | 7.541340726881407 |
| Ru | -12.200088611839082 | -7.044400242631267  | 7.544070889888687 |
| Ru | -10.840585258639555 | -4.687643966436736  | 7.544070889888687 |
| Ru | -9.481257822029633  | -2.334459767278367  | 7.568620674659412 |
| Ru | -8.125677274431126  | 0.003304530725807   | 7.588709102548655 |
| Ru | -12.170802740361577 | -11.730471110203425 | 7.532597554740348 |
| Ru | -10.820558764365806 | -9.388402574472270  | 7.543731584268067 |
| Ru | -9.479326129521361  | -7.043386544931995  | 7.544070889888687 |
| Ru | -8.139125487348689  | -4.676677485823735  | 7.543731584268067 |
| Ru | -6.787044025085467  | -2.331902458546891  | 7.575121055307608 |
| Ru | -5.427757721321833  | -0.010290828740733  | 7.577638270296341 |
| Ru | -10.827584503108408 | -14.079466792592443 | 7.559216325437735 |
| Ru | -9.465964755711282  | -11.731726982413756 | 7.575121055307608 |
| Ru | -8.121072551565987  | -9.397190736673629  | 7.568620674659412 |
| Ru | -6.785187581873082  | -7.050392522553283  | 7.541340726881407 |
| Ru | -5.435712649998367  | -4.674988802474495  | 7.532597554740348 |
| Ru | -4.073031834291051  | -2.337229844995083  | 7.559216325437735 |
| Ru | -2.721394876888934  | -0.008072913079292  | 7.552364703202727 |
| Ru | -9.486293909364759  | -16.414597200351558 | 7.552364703202727 |
| Ru | -8.135033258454570  | -14.069709267389458 | 7.577638270296341 |
| Ru | -6.774299555228303  | -11.740040076769127 | 7.588709102548655 |
| Ru | -5.426039068255835  | -9.412050390051370  | 7.555674519372495 |
| Ru | -4.0711102555008030 | -7.049783478410261  | 7.514149953349094 |
| Ru | -2.700359089196515  | -4.676983897842643  | 7.526690390827774 |
| Ru | -1.352972545047329  | -2.345109830170211  | 7.545383758925984 |
| Ru | 0.000000000000000   | 0.000000000000000   | 7.542264916513745 |
| Ru | -6.792372928486552  | -16.410005527151498 | 7.550485234380569 |
| Ru | -5.440520351754563  | -14.073750472456046 | 7.566518277091213 |
| Ru | -4.078534425867395  | -11.745986804541428 | 7.561523188859828 |
| Ru | -2.714326697584841  | -9.407944230946539  | 7.531380776899116 |
| Ru | -1.335367910143011  | -7.037130204857180  | 7.527314300275057 |
| Ru | 0.024704801451724   | -4.688060482391807  | 7.550485234380569 |
| Ru | 1.367688786253694   | -2.352760640569140  | 7.552364703202727 |
| Ru | -4.077982517768250  | -16.413328185150924 | 7.527314300275057 |
| Ru | -2.721314299739142  | -14.076000468114081 | 7.553780306813396 |
| Ru | -1.357412661541319  | -11.740638574298380 | 7.541413193571868 |
| Ru | 0.010483160770853   | -9.380703204692846  | 7.553780306813396 |
| Ru | 1.372034740176829   | -7.026926683357975  | 7.566518277091213 |
| Ru | 2.722790979776408   | -4.695430657869804  | 7.577638270296341 |
| Ru | -1.335317949800386  | -16.422134512799676 | 7.531380776899116 |
| Ru | 0.006397592789819   | -14.080665315161321 | 7.541413193571868 |
| Ru | 1.351015068751495   | -11.729557618540294 | 7.541413193571868 |



|    |                     |                     |                   |
|----|---------------------|---------------------|-------------------|
| Ru | 2.706944247658766   | -9.370322928727518  | 7.561523188859828 |
| Ru | 4.059976829659422   | -7.038695207956681  | 7.588709102548655 |
| Ru | 1.371590178208635   | -16.434551774731062 | 7.561523188859828 |
| Ru | 2.710831138968292   | -14.094157835193068 | 7.553780306813396 |
| Ru | 4.049644647385226   | -11.720782764253777 | 7.531380776899116 |
| Ru | 5.401944794623951   | -9.370317883949586  | 7.555674519372495 |
| Ru | 4.068485611577737   | -16.450184352185982 | 7.566518277091213 |
| Ru | 5.413350427911260   | -14.100403117991897 | 7.527314300275057 |
| Ru | 6.770259694005746   | -11.724860780754943 | 7.514149953349094 |
| Ru | 6.767668127034815   | -16.452795498456680 | 7.550485234380569 |
| Ru | 8.139792675965706   | -14.098359234500096 | 7.526690390827774 |
| Ru | 9.485561584926607   | -16.431167244283934 | 7.545383758925984 |
| Ru | -8.147488347516825  | -17.216961709301930 | 9.687102889261654 |
| Ru | -17.625984863474422 | -0.803366042850663  | 9.663743711976124 |
| Ru | -5.435879469500922  | -17.207524421816590 | 9.635025791024253 |
| Ru | -16.263673818364541 | -3.152290239628768  | 9.700289309866319 |
| Ru | -14.900122978484122 | -0.786001783708985  | 9.588836623265578 |
| Ru | -2.721189259462395  | -17.199693298153512 | 9.604553764274732 |
| Ru | -14.912593414416433 | -5.491443155467049  | 9.735407810120520 |
| Ru | -13.531586151298624 | -3.131971348867976  | 9.648778264985962 |
| Ru | -12.176962948004137 | -0.764152486770918  | 9.639108192828020 |
| Ru | 0.013360817188030   | -17.198180212643020 | 9.700651968135368 |
| Ru | -13.567320031304369 | -7.807666832205332  | 9.695799949957218 |
| Ru | -12.189762655517686 | -5.478695679078020  | 9.677353165511260 |
| Ru | -10.817977803171409 | -3.121953529543438  | 9.695799949957218 |
| Ru | -9.482501397122411  | -0.773344485269493  | 9.770669219715812 |
| Ru | 2.716783603510736   | -17.210603136592809 | 9.788766730693773 |
| Ru | -12.201840171215171 | -10.152711687936929 | 9.648778264985962 |
| Ru | -10.840429033459671 | -7.817296288093657  | 9.677353165511260 |
| Ru | -9.489808307770346  | -5.479438788706037  | 9.677353165511260 |
| Ru | -8.139432566708040  | -3.115024443105391  | 9.735407810120520 |
| Ru | -6.776041620639771  | -0.783576034349668  | 9.805417653693347 |
| Ru | 5.423211666668781   | -17.228130629114833 | 9.757400825775132 |
| Ru | -10.818199662106608 | -12.508609567595901 | 9.700289309866319 |
| Ru | -9.467974015623227  | -10.168963157305267 | 9.735407810120520 |
| Ru | -8.134702162271928  | -7.845810394128931  | 9.695799949957220 |
| Ru | -6.786573674233919  | -5.490747719072806  | 9.648778264985962 |
| Ru | -5.438126516276562  | -3.114530948653037  | 9.700289309866319 |
| Ru | -4.075745820280739  | -0.792799927139258  | 9.742858126320241 |
| Ru | 8.144070391118968   | -17.222881787196489 | 9.687102889261654 |
| Ru | -9.488711964714188  | -14.849331370707773 | 9.742858126320241 |
| Ru | -8.130575939057085  | -12.515418556265027 | 9.805417653693347 |
| Ru | -6.768485269392251  | -10.176671410056208 | 9.770669219715812 |
| Ru | -5.413293989740051  | -7.847795256727311  | 9.639108192828020 |
| Ru | -4.070636020703304  | -5.478544843298048  | 9.588836623265578 |
| Ru | -2.722742967742771  | -3.109197074123731  | 9.663743711976124 |
| Ru | -1.359495087925241  | -0.776350190397173  | 9.685755639834211 |
| Ru | -10.832591440987692 | -17.209898376340917 | 9.685755639834211 |
| Ru | -6.791604615733476  | -14.858004512866223 | 9.757400825775132 |
| Ru | -5.423211330365704  | -12.522932802923076 | 9.788766730693773 |
| Ru | -4.060741369474519  | -10.187911454778614 | 9.700651968135368 |
| Ru | -2.694776701639506  | -7.818965077729304  | 9.604553764274732 |
| Ru | -1.344213548652660  | -5.464058830605319  | 9.635025791024253 |
| Ru | 0.003417959650147   | -3.111018013379285  | 9.687102889261654 |
| Ru | -20.327913467834783 | -0.789182189139618  | 9.685755639834211 |
| Ru | -4.093861361838497  | -14.854996004187607 | 9.685549302359545 |
| Ru | -2.718335048382835  | -12.512254738920848 | 9.692232863691142 |
| Ru | -1.338865501670692  | -10.168659298142041 | 9.665543265988264 |
| Ru | 0.022126770312688   | -7.802544812991306  | 9.685549302359545 |
| Ru | 1.368392952316991   | -5.464726367896657  | 9.757400825775132 |
| Ru | -18.955542211752778 | -3.133299458030680  | 9.742858126320241 |
| Ru | -1.364249973438842  | -14.850592643501221 | 9.665543265988264 |
| Ru | 0.00000001084097    | -12.516953836625902 | 9.682668626719144 |

|    |                     |                     |                    |
|----|---------------------|---------------------|--------------------|
| Ru | 1.363237063805005   | -10.165156176648280 | 9.692232863691142  |
| Ru | 2.706427730107263   | -7.817325570361821  | 9.788766730693773  |
| Ru | -17.613382437050856 | -5.476436165263015  | 9.805417653693347  |
| Ru | 1.355097987830123   | -14.873450594308579 | 9.692232863691142  |
| Ru | 2.703115478361826   | -12.531609568234449 | 9.665543265988264  |
| Ru | 4.047380555538789   | -10.164769842456083 | 9.700651968135368  |
| Ru | -16.269013330233051 | -7.825414860552004  | 9.770669219715812  |
| Ru | 4.071734594778100   | -14.893320692698795 | 9.685549302359545  |
| Ru | 5.415965964354186   | -12.532203133994889 | 9.604553764274732  |
| Ru | -14.929743059003524 | -10.163483012379480 | 9.639108192828020  |
| Ru | 6.780093021405869   | -14.879278257455793 | 9.635025791024253  |
| Ru | -13.549240997560297 | -12.510884128870671 | 9.588836623265578  |
| Ru | -12.171272165530509 | -14.862867638903314 | 9.663743711976124  |
| Ru | -18.994471312577829 | -0.006836017275255  | 11.712940405315349 |
| Ru | -17.517036554157681 | -2.270144347278167  | 11.797856758732149 |
| Ru | -16.227621505632452 | 0.006602406565952   | 11.624533654283194 |
| Ru | -16.149688951512967 | -4.664464461724636  | 11.828595581762615 |
| Ru | -14.839926425831099 | -2.306885361487852  | 11.652784133450400 |
| Ru | -13.584919282770890 | 0.001343631244934   | 11.623343824523527 |
| Ru | -14.837883700170970 | -7.094460986626850  | 11.828361409091862 |
| Ru | -13.486886850082778 | -4.654516135526492  | 11.703648157738165 |
| Ru | -12.220808336762438 | -2.326214929396518  | 11.682017769656120 |
| Ru | -10.955355581103698 | 0.082632515502201   | 11.780021069084315 |
| Ru | -13.555034608093766 | -9.420423009692382  | 11.682017769656120 |
| Ru | -12.166852130871872 | -7.036287905210718  | 11.731566527988578 |
| Ru | -10.850178008832874 | -4.720483771996943  | 11.731566527988578 |
| Ru | -9.565041590506240  | -2.378216037971382  | 11.828361409091862 |
| Ru | -8.158310965587035  | 0.020648675575488   | 11.862925493393259 |
| Ru | -12.262215460412566 | -11.698310594285893 | 11.652784133450400 |
| Ru | -10.905627359258087 | -9.352728562345714  | 11.703648157738165 |
| Ru | -9.5029669860295259 | -7.018659076792344  | 11.731566527988578 |
| Ru | -8.127485790659136  | -4.768186056127795  | 11.703648157738165 |
| Ru | -6.804700243156797  | -2.457157627945317  | 11.828595581762615 |
| Ru | -5.352118247387605  | -0.026010449601674  | 11.850593915705215 |
| Ru | -10.955479047915745 | -14.035126481244415 | 11.797856758732149 |
| Ru | -9.565610805330250  | -11.653808664330052 | 11.828595581762615 |
| Ru | -8.117074709322788  | -9.302753729401767  | 11.828361409091862 |
| Ru | -6.744157055143794  | -7.028792814911099  | 11.682017769656120 |
| Ru | -5.417858113756347  | -4.770234798226259  | 11.652784133450400 |
| Ru | -4.047484397926584  | -2.470159925477416  | 11.797856758732149 |
| Ru | -2.657132095565325  | 0.013904478001979   | 11.741827912320549 |
| Ru | -9.499392321041242  | -16.481239097036141 | 11.741827912320549 |
| Ru | -8.186466586425151  | -14.127355162914762 | 11.850593915705215 |
| Ru | -6.742962239603562  | -11.720450543633767 | 11.862925493393259 |
| Ru | -5.290760351844455  | -9.329130771047229  | 11.780021069084315 |
| Ru | -4.046376739823121  | -7.011217362411011  | 11.623343824523527 |
| Ru | -2.720471395371522  | -4.725199490441495  | 11.624533654283194 |
| Ru | -1.348684508332179  | -2.322318057256072  | 11.712940405315349 |
| Ru | 0.000000000000000   | 0.000000000000000   | 11.745087930427504 |
| Ru | -6.792817798446254  | -16.523790495025299 | 11.729723514418943 |
| Ru | -5.403087083224156  | -14.184331219170490 | 11.822306000807924 |
| Ru | -3.959165324933575  | -11.739756817748919 | 11.814129901421424 |
| Ru | -2.655222028009178  | -9.337846508493598  | 11.658876123940317 |
| Ru | -1.406204481448682  | -7.025354156675983  | 11.678040111079151 |
| Ru | -0.073613436316163  | -4.630782729768423  | 11.729723514418943 |
| Ru | 1.316524416606559   | -2.308096134965828  | 11.741827912320549 |
| Ru | -4.052762588996547  | -16.480562479509061 | 11.678040111079151 |
| Ru | -2.694757346990007  | -14.114054565371463 | 11.716562715820894 |
| Ru | -1.318202741582564  | -11.724635208737851 | 11.712885395136240 |
| Ru | -0.035751130546764  | -9.384675151791958  | 11.716562715820894 |
| Ru | 1.257552370087236   | -7.004054471494681  | 11.822306000807924 |
| Ru | 2.698584833812764   | -4.622065141483567  | 11.850593915705215 |
| Ru | -1.425576692980046  | -16.405997228691465 | 11.658876123940317 |

|    |                     |                     |                    |
|----|---------------------|---------------------|--------------------|
| Ru | -0.027066688311068  | -14.054710211177033 | 11.712885395136240 |
| Ru | 1.345269429893634   | -11.771516088085120 | 11.712885395136240 |
| Ru | 2.652655024019419   | -9.476814595959121  | 11.814129901421424 |
| Ru | 4.061273205190597   | -7.075628885941720  | 11.862925493393259 |
| Ru | 1.306510300914159   | -16.334290094291976 | 11.814129901421424 |
| Ru | 2.730508477536779   | -14.052131790836581 | 11.716562715820894 |
| Ru | 4.080798720989220   | -11.807017770814927 | 11.658876123940317 |
| Ru | 5.406115932948155   | -9.528932498454973  | 11.780021069084315 |
| Ru | 4.145534713136937   | -16.362475817334833 | 11.822306000807924 |
| Ru | 5.458967070445226   | -14.044944871814952 | 11.678040111079151 |
| Ru | 6.791296022594015   | -11.765557022833915 | 11.623343824523527 |
| Ru | 6.866431234762420   | -16.396288283206285 | 11.729723514418943 |
| Ru | 8.108092901003983   | -14.056833670124455 | 11.624533654283194 |
| Ru | 9.503155820910015   | -16.446276679468678 | 11.712940405315349 |
| O  | 7.816975957319168   | -16.424095017359470 | 14.378698415596796 |
| O  | 4.486009353433939   | -15.999469753814356 | 14.116428359738292 |
| O  | 1.217537507691016   | -15.647853265426754 | 14.069218056104960 |
| O  | -2.009310161713433  | -15.095613568296876 | 14.695404261922663 |
| O  | -5.258951841747482  | -14.660694032648788 | 14.116428359738292 |
| O  | -8.507342823648116  | -14.297681794067287 | 14.153814204415879 |
| O  | -11.753426414309580 | -13.836908007872832 | 14.022231225958302 |
| O  | 6.549328140059507   | -13.368822768895663 | 14.605384891678218 |
| O  | 3.237839877723252   | -12.967737737891202 | 14.695404261922663 |
| O  | 0.00000017344080    | -12.516953909850056 | 14.641550817184513 |
| O  | -3.320207106458027  | -12.005922628759492 | 14.069218056104960 |
| O  | -6.604387583852551  | -11.660506062896095 | 14.232713876290083 |
| O  | -9.846809619045164  | -11.253015855009313 | 14.123715276502105 |
| O  | -13.098383533511150 | -10.726255058139488 | 14.681509398405398 |
| O  | 5.325959954541142   | -10.251398371576505 | 14.071613549006196 |
| O  | 2.102669650799015   | -9.897085835363796  | 14.069218056104960 |
| O  | -1.228529667229802  | -9.487510421484505  | 14.695404261922663 |
| O  | -4.625008601088827  | -9.037315073847317  | 14.071613549006196 |
| O  | -7.918958589029028  | -8.651811123168589  | 14.068231711357884 |
| O  | -11.124886346108189 | -8.136144815653820  | 14.770763450277975 |
| O  | -14.373208836940872 | -7.591505978571297  | 14.068231711357884 |
| O  | 4.043899408254656   | -7.225610394266000  | 14.232713876290083 |
| O  | 0.772942539261452   | -6.890697941209435  | 14.116428359738292 |
| O  | -2.536923972469542  | -6.419134946472217  | 14.605384891678218 |
| O  | -5.841598903341293  | -5.980405485230008  | 14.681509398405398 |
| O  | -9.071448764559097  | -5.566361906011288  | 14.770763450277975 |
| O  | -12.323664838384722 | -5.072924252007347  | 14.770763450277975 |
| O  | -15.661992702324730 | -4.621335645949245  | 14.123715276502105 |
| O  | -18.968484147123252 | -4.259014948756823  | 14.153814204415879 |
| O  | -0.524804497361519  | -3.793683611321855  | 14.378698415596796 |
| O  | -3.820172986109224  | -3.260311978136806  | 14.022231225958302 |
| O  | -7.011197629850246  | -2.901079472714029  | 14.123715276502105 |
| O  | -10.227832521998010 | -2.532113873810284  | 14.068231711357884 |
| O  | -13.580017511115495 | -2.068770432180668  | 14.681509398405398 |
| O  | -16.946400548633203 | -1.678210987662811  | 14.022231225958302 |
| O  | -20.191493485185898 | -1.172345994872486  | 14.716325119934103 |
| O  | -1.759534583190060  | -0.702911553843010  | 14.716325119934103 |
| O  | -5.044172977196556  | -0.218734232726054  | 14.153814204415879 |
| O  | 2.560488224377831   | -18.664745270510352 | 14.232713876290083 |
| O  | -0.700951301420318  | -18.262148284126212 | 14.071613549006196 |
| O  | -4.012404118810030  | -17.762904012304571 | 14.605384891678218 |
| O  | -7.292171407925643  | -17.333083100868702 | 14.378698415596796 |
| O  | -10.568971882844011 | -16.900173424957096 | 14.716325119934103 |
| Zn | 6.066190199053914   | -17.095969313776887 | 14.193488879515822 |
| Zn | 2.743957947739054   | -16.764936041169520 | 14.131583835995791 |
| Zn | -0.611993718599038  | -16.283603052576925 | 14.189095428879069 |
| Zn | -3.684355516929902  | -15.892224231954030 | 14.269618991924869 |
| Zn | -6.998638915417676  | -15.480920817912711 | 14.193488879515822 |
| Zn | -10.288936954187635 | -15.140859641613813 | 14.156337257304694 |

|    |                     |                     |                    |
|----|---------------------|---------------------|--------------------|
| Zn | 8.026288139961181   | -14.526496451819167 | 14.197666382558083 |
| Zn | 4.765247705033968   | -14.020063988331911 | 14.269618991924869 |
| Zn | 1.494345787534265   | -13.616545792675153 | 14.150904396471152 |
| Zn | -1.699447552019208  | -13.261299175947478 | 14.150904396471152 |
| Zn | -5.050839568351694  | -12.769299927312902 | 14.131583835995791 |
| Zn | -8.347170624122786  | -12.411818471995010 | 14.126420854385424 |
| Zn | -11.676940289882312 | -11.896510601525698 | 14.248944365897184 |
| Zn | -14.797021260593176 | -11.498476894288043 | 14.257052405041794 |
| Zn | 3.568010805948056   | -11.163631209177989 | 14.189095428879069 |
| Zn | 0.205101713536961   | -10.673016319704907 | 14.150904396471152 |
| Zn | -2.956017139381101  | -10.103627024694903 | 14.189095428879069 |
| Zn | -6.388818652531818  | -9.764819828033117  | 14.159545763133938 |
| Zn | -9.752383841364725  | -9.273086661912048  | 14.170329055885876 |
| Zn | -12.787497395591370 | -8.870089814633165  | 14.186605074629279 |
| Zn | -16.102172798181766 | -8.360141490978094  | 14.159545763133938 |
| Zn | 2.306881568580558   | -8.016625317967403  | 14.131583835995791 |
| Zn | -1.080892236883940  | -7.638573068041461  | 14.269618991924869 |
| Zn | -4.323516235372844  | -7.065357740918492  | 14.257052405041794 |
| Zn | -7.604528150923341  | -6.639252562270022  | 14.186605074629279 |
| Zn | -10.840000017344078 | -6.258476844149944  | 14.511593859324494 |
| Zn | -13.994536787851999 | -5.693075173231565  | 14.170329055885876 |
| Zn | -17.415364879677874 | -5.340659612052241  | 14.126420854385424 |
| Zn | 0.932448665415782   | -4.973971156637952  | 14.193488879515822 |
| Zn | -2.272829076749453  | -4.561212975012180  | 14.197666382558083 |
| Zn | -5.538849418697026  | -4.164271504806227  | 14.248944365897184 |
| Zn | -8.773079419563304  | -3.809268699183799  | 14.170329055885876 |
| Zn | -12.127974505517308 | -3.266088155546778  | 14.186605074629279 |
| Zn | -15.304210342368565 | -2.714648427995483  | 14.248944365897184 |
| Zn | -18.807900697682857 | -2.294520057197571  | 14.156337257304694 |
| Zn | -0.261767017763705  | -1.841428442765322  | 14.279691082581492 |
| Zn | -3.423162400161516  | -1.340050833638575  | 14.156337257304694 |
| Zn | -6.757464544979279  | -1.022952450280299  | 14.126420854385424 |
| Zn | -10.029008601318433 | -0.650469213438751  | 14.159545763133938 |
| Zn | -13.399462552813926 | -0.211595899121007  | 14.257052405041794 |
| Zn | -5.753459115243814  | -18.463151859618481 | 14.197666382558083 |
| Zn | -9.114392641404265  | -18.081413295955112 | 14.279691082581492 |
| Zn | 9.376159610387955   | -17.628019549606968 | 14.279691082581492 |

**25/36 Pd**

|    |                     |                     |                     |
|----|---------------------|---------------------|---------------------|
|    | 16.5038722728940215 | 0.0000000000000000  | 0.0000000000000000  |
|    | 8.2519361364470107  | 14.2927726491398417 | 0.0000000000000000  |
|    | 0.0000000000000000  | 0.0000000000000000  | 20.0376776414429365 |
| Pd | 0.0000000000000000  | 0.0000000000000000  | 5.5000000000000034  |
| Pd | 1.375322689407816   | 2.382128774856606   | 5.5000000000000034  |
| Pd | 2.750645378815690   | 4.764257549713315   | 5.5000000000000034  |
| Pd | 4.125968068223505   | 7.146386324569921   | 5.5000000000000034  |
| Pd | 5.501290757631321   | 9.528515099426528   | 5.5000000000000034  |
| Pd | 6.876613447039195   | 11.910643874283235  | 5.5000000000000034  |
| Pd | 2.750645378815631   | 0.0000000000000000  | 5.5000000000000034  |
| Pd | 4.125968068223447   | 2.382128774856606   | 5.5000000000000034  |
| Pd | 5.501290757631321   | 4.764257549713315   | 5.5000000000000034  |
| Pd | 6.876613447039137   | 7.146386324569921   | 5.5000000000000034  |
| Pd | 8.251936136446952   | 9.528515099426528   | 5.5000000000000034  |
| Pd | 9.627258825854826   | 11.910643874283235  | 5.5000000000000034  |
| Pd | 5.501290757631380   | 0.0000000000000000  | 5.5000000000000034  |
| Pd | 6.876613447039196   | 2.382128774856606   | 5.5000000000000034  |
| Pd | 8.251936136447069   | 4.764257549713315   | 5.5000000000000034  |
| Pd | 9.627258825854884   | 7.146386324569921   | 5.5000000000000034  |
| Pd | 11.002581515262701  | 9.528515099426528   | 5.5000000000000034  |
| Pd | 12.377904204670575  | 11.910643874283235  | 5.5000000000000034  |
| Pd | 8.251936136447011   | 0.0000000000000000  | 5.5000000000000034  |
| Pd | 9.627258825854826   | 2.382128774856606   | 5.5000000000000034  |
| Pd | 11.002581515262701  | 4.764257549713315   | 5.5000000000000034  |

|    |                    |                    |                    |
|----|--------------------|--------------------|--------------------|
| Pd | 12.377904204670516 | 7.146386324569921  | 5.500000000000034  |
| Pd | 13.753226894078331 | 9.528515099426528  | 5.500000000000034  |
| Pd | 15.128549583486205 | 11.910643874283235 | 5.500000000000034  |
| Pd | 11.002581515262642 | 0.000000000000000  | 5.500000000000034  |
| Pd | 12.377904204670457 | 2.382128774856606  | 5.500000000000034  |
| Pd | 13.753226894078333 | 4.764257549713315  | 5.500000000000034  |
| Pd | 15.128549583486148 | 7.146386324569921  | 5.500000000000034  |
| Pd | 16.503872272893965 | 9.528515099426528  | 5.500000000000034  |
| Pd | 17.879194962301838 | 11.910643874283235 | 5.500000000000034  |
| Pd | 13.753226894078390 | 0.000000000000000  | 5.500000000000034  |
| Pd | 15.128549583486205 | 2.382128774856606  | 5.500000000000034  |
| Pd | 16.503872272894078 | 4.764257549713315  | 5.500000000000034  |
| Pd | 17.879194962301895 | 7.146386324569921  | 5.500000000000034  |
| Pd | 19.254517651709712 | 9.528515099426528  | 5.500000000000034  |
| Pd | 20.629840341117585 | 11.910643874283235 | 5.500000000000034  |
| Pd | 1.373772036770776  | 0.793147655234788  | 7.754769638888393  |
| Pd | 2.731958824692349  | 3.182408605581707  | 7.756561208714535  |
| Pd | 4.091069041098146  | 5.575514484055047  | 7.758917290096256  |
| Pd | 5.468933474636328  | 7.962045688885289  | 7.758917290096256  |
| Pd | 6.861868851137213  | 10.335622602072336 | 7.756561208714535  |
| Pd | 8.251936136447011  | 12.706477338670267 | 7.754769638888393  |
| Pd | 4.122026110002145  | 0.774741441485798  | 7.756561208714535  |
| Pd | 5.485816046778318  | 3.167237371332229  | 7.732328294987211  |
| Pd | 6.861804530744198  | 5.566850406474739  | 7.721998365893267  |
| Pd | 8.251936136447013  | 7.958297906475386  | 7.732328294987211  |
| Pd | 9.642003421756806  | 10.335622602072336 | 7.756561208714535  |
| Pd | 11.014940701563416 | 12.697551219697653 | 7.774075792414532  |
| Pd | 6.874071702908832  | 0.755212476199513  | 7.758917290096256  |
| Pd | 8.251936136446952  | 3.159071836190263  | 7.721998365893267  |
| Pd | 9.642067742149706  | 5.566850406474739  | 7.721998365893267  |
| Pd | 11.034938798257702 | 7.962045688885289  | 7.758917290096256  |
| Pd | 12.407231927226182 | 10.327769781959066 | 7.811215298676704  |
| Pd | 13.763377240893229 | 12.676682367676824 | 7.811215298676704  |
| Pd | 9.629800569985198  | 0.755212476199513  | 7.758917290096256  |
| Pd | 11.018056226115707 | 3.167237371332229  | 7.732328294987211  |
| Pd | 12.412803231795884 | 5.575514484055047  | 7.758917290096256  |
| Pd | 13.787081640860446 | 7.959975296690124  | 7.828502216447486  |
| Pd | 15.142417965187853 | 10.314551110470095 | 7.876553964106520  |
| Pd | 16.503872272894021 | 12.665594704899434 | 7.828502216447486  |
| Pd | 12.381846162891874 | 0.774741441485798  | 7.756561208714535  |
| Pd | 13.771913448201671 | 3.182408605581707  | 7.756561208714535  |
| Pd | 15.147726959226917 | 5.581093148643697  | 7.811215298676704  |
| Pd | 16.503872272894021 | 7.956443077339496  | 7.876553964106520  |
| Pd | 17.865326580600193 | 10.314551110470095 | 7.876553964106520  |
| Pd | 19.244367304894702 | 12.676682367676824 | 7.811215298676704  |
| Pd | 15.130100236123244 | 0.793147655234788  | 7.754769638888393  |
| Pd | 16.503872272893961 | 3.190442858884277  | 7.774075792414532  |
| Pd | 17.860017586561014 | 5.581093148643697  | 7.811215298676704  |
| Pd | 19.220662904927593 | 7.959975296690124  | 7.828502216447486  |
| Pd | 20.600512618561748 | 10.327769781959066 | 7.811215298676704  |
| Pd | 21.992803844224508 | 12.697551219697653 | 7.774075792414532  |
| Pd | 16.503872272894021 | 1.591802964649126  | 9.986698871169303  |
| Pd | 17.874515437674827 | 3.979151570649918  | 10.029015658103855 |
| Pd | 19.247021599926740 | 6.359755146197974  | 10.062114914126200 |
| Pd | 20.619673554401125 | 8.737258072456333  | 10.062114914126200 |
| Pd | 21.995083646039852 | 11.116185063591201 | 10.029015658103855 |
| Pd | 23.377266604135507 | 13.496871166815280 | 9.986698871169303  |
| Pd | 2.749854003023664  | 1.587628948877882  | 9.977699753584325  |
| Pd | 4.118484767487809  | 3.971739516146650  | 9.959109059508968  |
| Pd | 5.492053737929345  | 6.357676395429162  | 9.950404332038243  |
| Pd | 6.871551201993460  | 8.740190457322932  | 9.959109059508968  |
| Pd | 8.251936136447071  | 11.117514751384185 | 9.977699753584325  |
| Pd | 9.630477941652538  | 13.496871166815280 | 9.986698871169303  |

|    |                     |                    |                    |
|----|---------------------|--------------------|--------------------|
| Pd | 5.498869701941419   | 1.580842675670363  | 9.959109059508968  |
| Pd | 6.870244218308489   | 3.966537348838875  | 9.904601816929867  |
| Pd | 8.251936136447009   | 6.359697951462088  | 9.904601816929867  |
| Pd | 9.632321070900680   | 8.740190457322932  | 9.959109059508968  |
| Pd | 11.012660899748184  | 11.116185063591201 | 10.029015658103855 |
| Pd | 12.383304064528993  | 13.490208664038560 | 10.029015658103855 |
| Pd | 8.251936136447009   | 1.577419858281514  | 9.950404332038243  |
| Pd | 9.633628054585529   | 3.966537348838875  | 9.904601816929867  |
| Pd | 11.011818534964672  | 6.357676395429162  | 9.950404332038243  |
| Pd | 12.388070991386915  | 8.737258072456333  | 10.062114914126200 |
| Pd | 13.756295106653843  | 11.114829515974593 | 10.144693398244392 |
| Pd | 15.131220318419633  | 13.488532079625374 | 10.062114914126200 |
| Pd | 11.005002570952723  | 1.580842675670363  | 9.959109059508968  |
| Pd | 12.385387505406333  | 3.971739516146650  | 9.959109059508968  |
| Pd | 13.760722945861302  | 6.359755146197974  | 10.062114914126200 |
| Pd | 15.127876182572322  | 8.734083386275456  | 10.196988667634052 |
| Pd | 16.503872272894085  | 11.117378525728883 | 10.196988667634052 |
| Pd | 17.876524227368407  | 13.488532079625374 | 10.062114914126200 |
| Pd | 13.7540128269870480 | 1.587628948877882  | 9.977699753584325  |
| Pd | 15.133229108113211  | 3.979151570649918  | 10.029015658103855 |
| Pd | 16.503872272894018  | 6.355886266330492  | 10.144693398244392 |
| Pd | 17.879868363215849  | 8.734083386275456  | 10.196988667634052 |
| Pd | 19.251449439134195  | 11.114829515974593 | 10.144693398244392 |
| Pd | 20.624440481259043  | 13.490208664038560 | 10.029015658103855 |
| Pd | 0.000000000000000   | 0.000000000000000  | 12.241789464176279 |
| Pd | 1.390737241366181   | 2.369134558174227  | 12.262220941965094 |
| Pd | 2.805315978655617   | 4.727721351321614  | 12.284254463509676 |
| Pd | 4.205897736304591   | 7.100238909187071  | 12.301895426357866 |
| Pd | 5.560267333516204   | 9.499437070320862  | 12.284254463509676 |
| Pd | 6.895574044767602   | 11.903791589040530 | 12.262220941965094 |
| Pd | 2.747099333045593   | 0.019846501925090  | 12.262220941965094 |
| Pd | 4.151427087817273   | 2.396827546672406  | 12.235781615235064 |
| Pd | 5.544898707906995   | 4.752218263061947  | 12.195657629262168 |
| Pd | 6.908843750260502   | 7.114640375149904  | 12.195657629262168 |
| Pd | 8.251936136446952   | 9.499117555794928  | 12.235781615235064 |
| Pd | 9.608298228126426   | 11.903791589040530 | 12.262220941965094 |
| Pd | 5.496984781586423   | 0.065614227497361  | 12.284254463509676 |
| Pd | 6.887991094093505   | 2.425914010927992  | 12.195657629262168 |
| Pd | 8.251936136447069   | 4.764257549713315  | 12.135452857268302 |
| Pd | 9.595028522633521   | 7.114640375149904  | 12.195657629262168 |
| Pd | 10.943604939377813  | 9.499437070320862  | 12.284254463509676 |
| Pd | 12.332524528670120  | 11.936843842437835 | 12.370096852550221 |
| Pd | 8.251936136447013   | 0.092294830765703  | 12.301895426357866 |
| Pd | 9.615881178800517   | 2.425914010927992  | 12.195657629262168 |
| Pd | 10.958973564987028  | 4.752218263061947  | 12.195657629262168 |
| Pd | 12.297974536589436  | 7.100238909187071  | 12.301895426357866 |
| Pd | 13.681702856349062  | 9.515095802966387  | 12.435017277588331 |
| Pd | 15.104409016256962  | 11.979295156168083 | 12.435017277588331 |
| Pd | 11.006887491307594  | 0.065614227497361  | 12.284254463509676 |
| Pd | 12.352445185076631  | 2.396827546672406  | 12.235781615235064 |
| Pd | 13.698556294238399  | 4.727721351321614  | 12.284254463509676 |
| Pd | 15.081166112986118  | 7.091154339145207  | 12.435017277588331 |
| Pd | 16.503872272893965  | 9.528515099426528  | 12.481260649820188 |
| Pd | 17.903335529531073  | 11.979295156168085 | 12.435017277588331 |
| Pd | 13.756772939848435  | 0.019846501925090  | 12.262220941965094 |
| Pd | 15.113135031527847  | 2.369134558174227  | 12.262220941965094 |
| Pd | 16.503872272894078  | 4.711857613404114  | 12.370096852550221 |
| Pd | 17.926578432801918  | 7.091154339145207  | 12.435017277588331 |
| Pd | 19.326041689438973  | 9.515095802966387  | 12.435017277588331 |
| Pd | 20.675220017118040  | 11.936843842437835 | 12.370096852550221 |
| O  | 1.656214375913477   | 0.956215785278123  | 14.947920533600243 |
| O  | 4.961016352285080   | 0.958118887946117  | 14.995990499075777 |
| O  | 3.310263499355770   | 3.817306699958953  | 14.995990499075777 |

|    |                    |                    |                    |
|----|--------------------|--------------------|--------------------|
| O  | 8.251936088585749  | 0.963163991017893  | 14.961812954777029 |
| O  | 6.608726377606575  | 3.815549922620484  | 14.974666711859777 |
| O  | 4.960092554930974  | 6.664804241875029  | 14.961812954777029 |
| O  | 11.542855824886532 | 0.958118887946117  | 14.995990499075777 |
| O  | 9.895145799565039  | 3.815549922620484  | 14.974666711859777 |
| O  | 8.251936088585810  | 6.661672629527086  | 14.974666711859777 |
| O  | 6.601183235656496  | 9.517346886862979  | 14.995990499075777 |
| O  | 14.847657801258013 | 0.956215785278123  | 14.947920533600243 |
| O  | 13.193608677815838 | 3.817306699958953  | 14.995990499075777 |
| O  | 11.543779622240523 | 6.664804241875029  | 14.961812954777029 |
| O  | 9.902688941515114  | 9.517346886862979  | 14.995990499075777 |
| O  | 8.251936088585746  | 12.380340904211700 | 14.947920533600243 |
| O  | 16.503872225032765 | 3.831346920857986  | 14.872625786165887 |
| O  | 14.852023045649656 | 6.681257699503939  | 14.806474558394475 |
| O  | 13.212150446231814 | 9.521600359635682  | 14.806474558394475 |
| O  | 11.569979903096883 | 12.377099101524907 | 14.872625786165887 |
| O  | 18.155721404415857 | 6.681257699503939  | 14.806474558394475 |
| O  | 16.503872225032815 | 9.528515041302631  | 14.908946105800082 |
| O  | 14.863999625614914 | 12.382687064768168 | 14.806474558394475 |
| O  | 19.795594003833699 | 9.521600359635682  | 14.806474558394475 |
| O  | 18.143744824450597 | 12.382687064768168 | 14.806474558394475 |
| O  | 21.437764546968644 | 12.377099101524907 | 14.872625786165887 |
| Zn | 16.503872320755288 | 1.892154804887803  | 14.664380985611638 |
| Zn | 3.307836094662297  | 1.909780090179688  | 14.746898111824656 |
| Zn | 18.178943326242621 | 4.733858735905326  | 14.708966044921528 |
| Zn | 6.597027557095783  | 1.922251676350682  | 14.758041838339294 |
| Zn | 4.963232536328608  | 4.752067661472477  | 14.758041838339294 |
| Zn | 19.845753628520079 | 7.599079084912741  | 14.737204135030487 |
| Zn | 9.906844811520765  | 1.922251676350682  | 14.758041838339294 |
| Zn | 8.251936184308216  | 4.764257607837211  | 14.727059200836266 |
| Zn | 6.618141163541098  | 7.618453485688573  | 14.758041838339294 |
| Zn | 21.493702087061834 | 10.475189324478251 | 14.708966044921528 |
| Zn | 13.196036273954252 | 1.909780090179688  | 14.746898111824656 |
| Zn | 11.540639832287939 | 4.752067661472477  | 14.758041838339294 |
| Zn | 9.885731205075448  | 7.618453485688573  | 14.758041838339294 |
| Zn | 8.251936184308274  | 10.473212643152358 | 14.746898111824656 |
| Zn | 23.117154378613506 | 13.346695333881891 | 14.664380985611638 |
| Zn | 14.828801315267835 | 4.733858735905326  | 14.708966044921528 |
| Zn | 13.161991012990486 | 7.599079084912741  | 14.737204135030487 |
| Zn | 11.514042554448624 | 10.475189324478251 | 14.708966044921528 |
| Zn | 9.890590262897073  | 13.346695333881891 | 14.664380985611638 |
| Zn | 16.503872320755228 | 7.624082007904410  | 14.720762208753857 |
| Zn | 14.854584833352510 | 10.480731732373535 | 14.720762208753857 |
| Zn | 13.189113559936017 | 13.376497412267900 | 14.708966044921528 |
| Zn | 18.153159808157952 | 10.480731732373535 | 14.720762208753857 |
| Zn | 16.503872320755281 | 13.387387302826090 | 14.737204135030487 |
| Zn | 19.818631081574438 | 13.376497412267900 | 14.708966044921528 |

**25/36 Pt**

|    |                     |                     |                     |
|----|---------------------|---------------------|---------------------|
|    | 16.6311514935075984 | 0.0000000000000000  | 0.0000000000000000  |
|    | 8.3155757467537992  | 14.4029996875650852 | 0.0000000000000000  |
|    | 0.0000000000000000  | 0.0000000000000000  | 20.0896391656700004 |
| Pt | 0.0000000000000000  | 0.0000000000000000  | 5.500000000000015   |
| Pt | 1.385929291125614   | 2.400499947927480   | 5.500000000000015   |
| Pt | 2.771858582251286   | 4.800999895855062   | 5.500000000000015   |
| Pt | 4.157787873376900   | 7.201499843782543   | 5.500000000000015   |
| Pt | 5.543717164502513   | 9.601999791710023   | 5.500000000000015   |
| Pt | 6.929646455628186   | 12.002499739637605  | 5.500000000000015   |
| Pt | 2.771858582251227   | 0.0000000000000000  | 5.500000000000015   |
| Pt | 4.157787873376841   | 2.400499947927480   | 5.500000000000015   |
| Pt | 5.543717164502514   | 4.800999895855062   | 5.500000000000015   |
| Pt | 6.929646455628127   | 7.201499843782543   | 5.500000000000015   |
| Pt | 8.315575746753741   | 9.601999791710023   | 5.500000000000015   |

|    |                    |                    |                    |
|----|--------------------|--------------------|--------------------|
| Pt | 9.701505037879413  | 12.002499739637605 | 5.500000000000015  |
| Pt | 5.543717164502572  | 0.000000000000000  | 5.500000000000015  |
| Pt | 6.929646455628186  | 2.400499947927480  | 5.500000000000015  |
| Pt | 8.315575746753858  | 4.800999895855062  | 5.500000000000015  |
| Pt | 9.701505037879471  | 7.201499843782543  | 5.500000000000015  |
| Pt | 11.087434329005085 | 9.601999791710023  | 5.500000000000015  |
| Pt | 12.473363620130758 | 12.002499739637605 | 5.500000000000015  |
| Pt | 8.315575746753799  | 0.000000000000000  | 5.500000000000015  |
| Pt | 9.701505037879413  | 2.400499947927480  | 5.500000000000015  |
| Pt | 11.087434329005085 | 4.800999895855062  | 5.500000000000015  |
| Pt | 12.473363620130698 | 7.201499843782543  | 5.500000000000015  |
| Pt | 13.859292911256311 | 9.601999791710023  | 5.500000000000015  |
| Pt | 15.245222202381985 | 12.002499739637605 | 5.500000000000015  |
| Pt | 11.087434329005026 | 0.000000000000000  | 5.500000000000015  |
| Pt | 12.473363620130639 | 2.400499947927480  | 5.500000000000015  |
| Pt | 13.859292911256311 | 4.800999895855062  | 5.500000000000015  |
| Pt | 15.245222202381925 | 7.201499843782543  | 5.500000000000015  |
| Pt | 16.631151493507538 | 9.601999791710023  | 5.500000000000015  |
| Pt | 18.017080784633212 | 12.002499739637605 | 5.500000000000015  |
| Pt | 13.859292911256372 | 0.000000000000000  | 5.500000000000015  |
| Pt | 15.245222202381985 | 2.400499947927480  | 5.500000000000015  |
| Pt | 16.631151493507659 | 4.800999895855062  | 5.500000000000015  |
| Pt | 18.017080784633272 | 7.201499843782543  | 5.500000000000015  |
| Pt | 19.403010075758885 | 9.601999791710023  | 5.500000000000015  |
| Pt | 20.788939366884556 | 12.002499739637605 | 5.500000000000015  |
| Pt | 1.389916532776785  | 0.802468684349788  | 7.772797061193651  |
| Pt | 2.762117299250888  | 3.217912223977514  | 7.775650177754410  |
| Pt | 4.123309405153957  | 5.625457436125668  | 7.782953115280487  |
| Pt | 5.505441401737874  | 8.019380276975625  | 7.782953115280487  |
| Pt | 6.909840663266233  | 10.401979826192591 | 7.775650177754410  |
| Pt | 8.315575746753799  | 12.798062318865510 | 7.772797061193651  |
| Pt | 4.167852382738452  | 0.783107637394976  | 7.775650177754410  |
| Pt | 5.535210128199455  | 3.195755057537097  | 7.762830136269594  |
| Pt | 6.914885827101481  | 5.609688598017418  | 7.758834110221458  |
| Pt | 8.315575746753799  | 8.011489572490889  | 7.762830136269594  |
| Pt | 9.721310830241361  | 10.401979826192591 | 7.775650177754410  |
| Pt | 11.111736170264995 | 12.788635714353450 | 7.785760436091911  |
| Pt | 6.933443750169884  | 0.758161974463795  | 7.782953115280487  |
| Pt | 8.315575746753737  | 3.183622491530142  | 7.758834110221458  |
| Pt | 9.716265666405993  | 5.609688598017418  | 7.758834110221458  |
| Pt | 11.125710091769729 | 8.019380276975625  | 7.782953115280487  |
| Pt | 12.518511507941527 | 10.398100554127993 | 7.825897088739690  |
| Pt | 13.885388016498407 | 12.765600114620863 | 7.825897088739690  |
| Pt | 9.697707743337718  | 0.758161974463795  | 7.782953115280487  |
| Pt | 11.095941365308143 | 3.195755057537097  | 7.762830136269594  |
| Pt | 12.507842088353645 | 5.625457436125668  | 7.782953115280487  |
| Pt | 13.902009318627343 | 8.026328822386182  | 7.848658719702491  |
| Pt | 15.266724330143106 | 10.389752181768177 | 7.912285191354115  |
| Pt | 16.631151493507595 | 12.753341730357802 | 7.848658719702491  |
| Pt | 12.463299110769141 | 0.783107637394976  | 7.775650177754410  |
| Pt | 13.869034194256706 | 3.217912223977514  | 7.775650177754410  |
| Pt | 15.264274984950656 | 5.642298706381205  | 7.825897088739690  |
| Pt | 16.631151493507591 | 8.026495011593806  | 7.912285191354115  |
| Pt | 17.995578656872080 | 10.389752181768177 | 7.912285191354115  |
| Pt | 19.376914970516665 | 12.765600114620863 | 7.825897088739690  |
| Pt | 15.241234960730814 | 0.802468684349788  | 7.772797061193651  |
| Pt | 16.631151493507542 | 3.228727946423168  | 7.785760436091911  |
| Pt | 17.998028002064416 | 5.642298706381205  | 7.825897088739690  |
| Pt | 19.360293668387847 | 8.026328822386182  | 7.848658719702491  |
| Pt | 20.743791479073543 | 10.398100554127993 | 7.825897088739690  |
| Pt | 22.150566816750086 | 12.788635714353450 | 7.785760436091911  |
| Pt | 16.631151493507598 | 1.613192668715367  | 10.000097154435467 |
| Pt | 18.013964766347225 | 4.022977842009170  | 10.043072668516640 |



|    |                    |                    |                    |
|----|--------------------|--------------------|--------------------|
| Pt | 19.383500719433105 | 6.420765259612915  | 10.092736853413600 |
| Pt | 20.762356026662779 | 8.809012708020706  | 10.092736853413600 |
| Pt | 22.154132866639372 | 11.193959343591088 | 10.043072668516640 |
| Pt | 23.549661407955075 | 13.596403353207402 | 10.000097154435467 |
| Pt | 2.784286752525481  | 1.607508706071695  | 9.997237540942507  |
| Pt | 4.157872256504653  | 4.013202008303132  | 10.000221711423116 |
| Pt | 5.531044341145890  | 6.408649852449718  | 10.000012952280283 |
| Pt | 6.918976985296943  | 8.795575683590062  | 10.000221711423116 |
| Pt | 8.315575746753860  | 11.187982275421799 | 9.997237540942507  |
| Pt | 9.712641579060120  | 13.596403353207402 | 10.000097154435467 |
| Pt | 5.554471017961568  | 1.594221995671991  | 10.000221711423116 |
| Pt | 6.929026579769459  | 4.000475361051968  | 9.975962098631014  |
| Pt | 8.315575746753797  | 6.402048965461146  | 9.975962098631014  |
| Pt | 9.712174508210772  | 8.795575683590062  | 10.000221711423116 |
| Pt | 11.108170120375831 | 11.193959343591088 | 10.043072668516640 |
| Pt | 12.490983393215455 | 13.589062189529917 | 10.043072668516640 |
| Pt | 8.315575746753796  | 1.585699982665643  | 10.000012952280283 |
| Pt | 9.702124913738137  | 4.000475361051968  | 9.975962098631014  |
| Pt | 11.100107152361703 | 6.408649852449718  | 10.000012952280283 |
| Pt | 12.499946960352418 | 8.809012708020706  | 10.092736853413600 |
| Pt | 13.881064720887945 | 11.189763130176846 | 10.186032878181987 |
| Pt | 15.252296186277924 | 13.576221407496551 | 10.092736853413600 |
| Pt | 11.076680475546148 | 1.594221995671991  | 10.000221711423116 |
| Pt | 12.473279237003062 | 4.013202008303132  | 10.000221711423116 |
| Pt | 13.878802267582092 | 6.420765259612915  | 10.092736853413600 |
| Pt | 15.252316400195379 | 8.805928979418145  | 10.275568818095978 |
| Pt | 16.631151493507659 | 11.194141416293988 | 10.275568818095978 |
| Pt | 18.010006800737273 | 13.576221407496551 | 10.092736853413600 |
| Pt | 13.846864740982237 | 1.607508706071695  | 9.997237540942507  |
| Pt | 15.248338220667980 | 4.022977842009170  | 10.043072668516640 |
| Pt | 16.631151493507602 | 6.426473114776482  | 10.186032878181987 |
| Pt | 18.009986586819938 | 8.805928979418145  | 10.275568818095978 |
| Pt | 19.381238266127259 | 11.189763130176846 | 10.186032878181987 |
| Pt | 20.771319593799753 | 13.589062189529917 | 10.043072668516640 |
| Pt | 0.000000000000000  | 0.000000000000000  | 12.275028056924304 |
| Pt | 1.392525098305484  | 2.381818529951488  | 12.301956066017572 |
| Pt | 2.809374432120853  | 4.760606632689210  | 12.341749328528030 |
| Pt | 4.215485979062781  | 7.168187826933067  | 12.355645948539822 |
| Pt | 5.597456681480677  | 9.589706744261344  | 12.341749328528030 |
| Pt | 6.949122941764047  | 12.006128312049372 | 12.301956066017572 |
| Pt | 2.758977903295238  | 0.015052845564228  | 12.301956066017572 |
| Pt | 4.169139583994627  | 2.407053861108422  | 12.301620043373035 |
| Pt | 5.566516846262182  | 4.792290385386899  | 12.297139308022565 |
| Pt | 6.948588953827919  | 7.186109495414551  | 12.297139308022565 |
| Pt | 8.315575746753739  | 9.588891965348136  | 12.301620043373035 |
| Pt | 9.682028551743553  | 12.006128312049372 | 12.301956066017572 |
| Pt | 5.527493497393977  | 0.052686310614534  | 12.341749328528030 |
| Pt | 6.933503639188063  | 2.424599806763636  | 12.297139308022565 |
| Pt | 8.315575746753858  | 4.800999895855062  | 12.261819465134266 |
| Pt | 9.682562539679681  | 7.186109495414551  | 12.297139308022565 |
| Pt | 11.033694812026926 | 9.589706744261344  | 12.341749328528030 |
| Pt | 12.421411328196880 | 12.032494409370653 | 12.394791720032522 |
| Pt | 8.315575746753799  | 0.066624033698950  | 12.355645948539822 |
| Pt | 9.697647854319536  | 2.424599806763636  | 12.297139308022565 |
| Pt | 11.064634647245418 | 4.792290385386899  | 12.297139308022565 |
| Pt | 12.415665514444818 | 7.168187826933067  | 12.355645948539822 |
| Pt | 13.785201157127439 | 9.595040818361444  | 12.520792342490431 |
| Pt | 15.214202973021676 | 12.070144567598447 | 12.520792342490431 |
| Pt | 11.103657996113625 | 0.052686310614534  | 12.341749328528030 |
| Pt | 12.462011909512849 | 2.407053861108422  | 12.301620043373035 |
| Pt | 13.821777061386749 | 4.760606632689210  | 12.341749328528030 |
| Pt | 15.202149677613360 | 7.140813989170279  | 12.520792342490431 |
| Pt | 16.631151493507538 | 9.601999791710023  | 12.585201641949778 |

|    |                    |                    |                    |
|----|--------------------|--------------------|--------------------|
| Pt | 18.048100013993519 | 12.070144567598447 | 12.520792342490431 |
| Pt | 13.872173590212364 | 0.015052845564228  | 12.301956066017572 |
| Pt | 15.238626395202116 | 2.381818529951488  | 12.301956066017572 |
| Pt | 16.631151493507662 | 4.741010556388975  | 12.394791720032522 |
| Pt | 18.060153309401834 | 7.140813989170279  | 12.520792342490431 |
| Pt | 19.477101829887754 | 9.595040818361444  | 12.520792342490431 |
| Pt | 20.840891658818446 | 12.032494409370653 | 12.394791720032522 |
| O  | 1.677412849399895  | 0.968454729416764  | 15.112463469936710 |
| O  | 5.010310032336070  | 0.970359335382415  | 15.165209262845096 |
| O  | 3.345510878018436  | 3.853876055058258  | 15.165209262845096 |
| O  | 8.315575698523427  | 0.994815731906464  | 15.226048222892043 |
| O  | 6.665699512586146  | 3.848443377202366  | 15.163732293020626 |
| O  | 5.019323571786966  | 6.704091889970981  | 15.226048222892043 |
| O  | 11.620841364710900 | 0.970359335382415  | 15.165209262845096 |
| O  | 9.965451884460826  | 3.848443377202366  | 15.163732293020626 |
| O  | 8.315575698523487  | 6.706112757443795  | 15.163732293020626 |
| O  | 6.650776544205851  | 9.578764121407850  | 15.165209262845096 |
| O  | 14.953738547646958 | 0.968454729416764  | 15.112463469936710 |
| O  | 13.285640519028535 | 3.853876055058258  | 15.165209262845096 |
| O  | 11.611827825259889 | 6.704091889970981  | 15.226048222892043 |
| O  | 9.980374852841120  | 9.578764121407850  | 15.165209262845096 |
| O  | 8.315575698523428  | 12.466090053014895 | 15.112463469936710 |
| O  | 16.631151445277222 | 3.867292647941597  | 15.076954159950178 |
| O  | 14.957469956696055 | 6.745207885288546  | 14.851273345220237 |
| O  | 13.320256387424866 | 9.580944970107433  | 14.851273345220237 |
| O  | 11.664749426234668 | 12.469353275735953 | 15.076954159950178 |
| O  | 18.304832933858407 | 6.745207885288546  | 14.851273345220237 |
| O  | 16.631151445277283 | 9.601999733137870  | 15.011912096752711 |
| O  | 14.993937876006042 | 12.479846344017538 | 14.851273345220237 |
| O  | 19.942046503129596 | 9.580944970107433  | 14.851273345220237 |
| O  | 18.268365014548419 | 12.479846344017538 | 14.851273345220237 |
| O  | 21.597553464319773 | 12.469353275735953 | 15.076954159950178 |
| Zn | 16.631151541737974 | 1.907814210249399  | 14.847979352363531 |
| Zn | 3.344491502597946  | 1.930943100053741  | 14.899041326779150 |
| Zn | 18.324653260271493 | 4.731594424253051  | 14.822263052518760 |
| Zn | 6.658183537033718  | 1.949792333855677  | 14.938651901892520 |
| Zn | 5.017661435130180  | 4.791259965292291  | 14.938651901892520 |
| Zn | 20.058115616990072 | 7.623441218932300  | 14.852226180870424 |
| Zn | 9.972968052934627  | 1.949792333855677  | 14.938651901892520 |
| Zn | 8.315575794984113  | 4.800999954427215  | 14.907231182549870 |
| Zn | 6.675053693080634  | 7.661947564133779  | 14.938651901892520 |
| Zn | 21.695797226675559 | 10.570587053694162 | 14.822263052518760 |
| Zn | 13.286660087370397 | 1.930943100053741  | 14.899041326779150 |
| Zn | 11.613490154838164 | 4.791259965292291  | 14.938651901892520 |
| Zn | 9.956097896887709  | 7.661947564133779  | 14.938651901892520 |
| Zn | 8.315575794984172  | 10.541113663174263 | 14.899041326779150 |
| Zn | 23.294511767439882 | 13.449092670298720 | 14.847979352363531 |
| Zn | 14.937649823204339 | 4.731594424253051  | 14.822263052518760 |
| Zn | 13.204187466485871 | 7.623441218932300  | 14.852226180870424 |
| Zn | 11.566505856800271 | 10.570587053694162 | 14.822263052518760 |
| Zn | 9.967791316036070  | 13.449092670298720 | 14.847979352363531 |
| Zn | 16.631151541737907 | 7.677618025906423  | 14.838190889064137 |
| Zn | 14.964587995247406 | 10.564190762470151 | 14.838190889064137 |
| Zn | 13.260007575333848 | 13.503818072899525 | 14.822263052518760 |
| Zn | 18.297715088228415 | 10.564190762470151 | 14.838190889064137 |
| Zn | 16.631151541737971 | 13.559117112982230 | 14.852226180870424 |
| Zn | 20.002295508141984 | 13.503818072899525 | 14.822263052518760 |

**19/27 Pt**

|    |                      |                      |                     |
|----|----------------------|----------------------|---------------------|
|    | -12.4733636201000007 | -7.2014998437999997  | 0.0000000000000000  |
|    | -12.4733636201000007 | -21.6044995313000001 | 0.0000000000000000  |
|    | 0.0000000000000000   | 0.0000000000000000   | 20.0896391656999995 |
| Pt | -19.403010076265502  | -24.004999479724535  | 5.499999999815235   |

|    |                     |                     |                    |
|----|---------------------|---------------------|--------------------|
| Pt | -18.017080785281856 | -21.604499532042333 | 5.49999999815235   |
| Pt | -16.631151494298297 | -19.203999584360286 | 5.49999999815235   |
| Pt | -15.245222203314650 | -16.803499636678083 | 5.49999999815235   |
| Pt | -13.859292911083646 | -14.402999686835393 | 5.49999999815235   |
| Pt | -12.473363620099999 | -12.002499739153190 | 5.49999999815235   |
| Pt | -11.087434329116443 | -9.601999791471144  | 5.49999999815235   |
| Pt | -9.701505038132796  | -7.201499843788941  | 5.49999999815235   |
| Pt | -8.315575747149149  | -4.800999896106738  | 5.49999999815235   |
| Pt | -15.245222202067204 | -21.604499531311060 | 5.49999999815235   |
| Pt | -13.859292911083557 | -19.203999583628857 | 5.49999999815235   |
| Pt | -12.473363620099999 | -16.803499635946810 | 5.49999999815235   |
| Pt | -11.087434329116352 | -14.402999688264607 | 5.49999999815235   |
| Pt | -9.701505036885347  | -12.002499738421918 | 5.49999999815235   |
| Pt | -8.315575745901700  | -9.601999790739713  | 5.49999999815235   |
| Pt | -6.929646454918144  | -7.201499843057666  | 5.49999999815235   |
| Pt | -5.543717163934497  | -4.800999895375464  | 5.49999999815235   |
| Pt | -4.157787872950850  | -2.400499947693262  | 5.49999999815235   |
| Pt | -11.087434329116354 | -19.203999583617797 | 5.49999999815235   |
| Pt | -9.701505038132707  | -16.803499635935594 | 5.49999999815235   |
| Pt | -8.315575747149149  | -14.402999688253548 | 5.49999999815235   |
| Pt | -6.929646456165503  | -12.002499740571345 | 5.49999999815235   |
| Pt | -5.543717163934498  | -9.601999790728655  | 5.49999999815235   |
| Pt | -4.157787872950850  | -7.201499843046451  | 5.49999999815235   |
| Pt | -2.771858581967293  | -4.800999895364405  | 5.49999999815235   |
| Pt | -1.385929290983647  | -2.400499947682202  | 5.49999999815235   |
| Pt | 0.000000000000000   | 0.000000000000000   | 5.49999999815235   |
| Pt | -18.010189206606068 | -23.244714808033461 | 7.774267724285473  |
| Pt | -16.617413697598515 | -20.798768752145676 | 7.777795873564348  |
| Pt | -15.247966940005824 | -18.359631804138782 | 7.814852183716391  |
| Pt | -13.901244837114341 | -15.970275748614579 | 7.838671689936939  |
| Pt | -12.525416751567127 | -13.594586204891744 | 7.805412924946813  |
| Pt | -11.099121905972417 | -11.193217874320887 | 7.777795873564348  |
| Pt | -9.673855401913286  | -8.793959348061199  | 7.780827804360028  |
| Pt | -8.275924076489787  | -6.421056748351635  | 7.814852183716391  |
| Pt | -6.910761857061868  | -4.050035997428851  | 7.805412924946813  |
| Pt | -13.860125974338814 | -20.794809226139147 | 7.773701805676022  |
| Pt | -12.494007343992717 | -18.383824544115804 | 7.780827804360028  |
| Pt | -11.125418924157257 | -15.989360280151287 | 7.774267724285473  |
| Pt | -9.716744821234235  | -13.591689765395561 | 7.761125709335436  |
| Pt | -8.284482729536684  | -11.176423818215261 | 7.774267724285473  |
| Pt | -6.880042083918445  | -8.782030328324703  | 7.838671689936939  |
| Pt | -5.520652212405757  | -6.422450867986679  | 7.902639660822745  |
| Pt | -4.165440319167219  | -4.053693298160619  | 7.838671689936939  |
| Pt | -2.778864494294084  | -1.628215482923046  | 7.780827804360028  |
| Pt | -22.176918878076343 | -25.620012124453446 | 7.777795873564348  |
| Pt | -20.790969833750161 | -23.223602506637565 | 7.761125709335436  |
| Pt | -19.385739826662885 | -20.796706480327323 | 7.761125709335436  |
| Pt | -17.983912252918277 | -18.362877017299414 | 7.805412924946813  |
| Pt | -16.624395526523607 | -15.972799314256514 | 7.902639660822745  |
| Pt | -15.275043120123286 | -13.612249034496321 | 7.902639660822745  |
| Pt | -13.896199845051841 | -11.226810667129900 | 7.814852183716391  |
| Pt | -12.481194816454126 | -8.807316424163494  | 7.773701805676022  |
| Pt | -11.078770069507065 | -6.405373568597360  | 7.773701805676022  |
| Pt | -19.400080045990858 | -22.409803458081097 | 9.968653603496977  |
| Pt | -17.999700897305395 | -19.992055316245803 | 9.998798560539674  |
| Pt | -16.600467101935394 | -17.570161616125855 | 10.155561243542831 |
| Pt | -15.242630436886316 | -15.186752892989016 | 10.277453115519068 |
| Pt | -13.903651002442569 | -12.792845259990116 | 10.155561243542831 |
| Pt | -12.497241859851346 | -10.401187078734836 | 10.019141898419344 |
| Pt | -11.086364952158258 | -8.015029165675678  | 9.997885973590218  |
| Pt | -9.690414070600266  | -5.622335388543808  | 10.019141898419344 |
| Pt | -20.787140949152963 | -24.826273012130827 | 9.998798560539674  |
| Pt | -15.232434929848210 | -19.983976751621256 | 10.019141898419344 |

|    |                     |                     |                    |
|----|---------------------|---------------------|--------------------|
| Pt | -13.855843399196356 | -17.576865899866366 | 10.080273015859534 |
| Pt | -12.499266434324671 | -15.175397363987788 | 10.063874370246651 |
| Pt | -11.106612633941559 | -12.793670421823316 | 9.998798560539674  |
| Pt | -9.697568461569880  | -10.406366003787433 | 9.999394853677508  |
| Pt | -8.294090687334389  | -8.018054049869388  | 10.080273015859534 |
| Pt | -6.915972755921866  | -5.644492342783828  | 10.155561243542831 |
| Pt | -5.554814393317091  | -3.236983578826401  | 10.063874370246651 |
| Pt | -16.636756709658613 | -22.405975572860868 | 9.999394853677508  |
| Pt | -11.085765687823971 | -17.598157329031221 | 9.999394853677508  |
| Pt | -9.707419065491843  | -15.203135179732332 | 9.968653603496977  |
| Pt | -8.312591750064659  | -12.797560270747061 | 9.968653603496977  |
| Pt | -6.892646411310876  | -10.393618431565645 | 10.063874370246651 |
| Pt | -5.530798587856298  | -8.012117748303407  | 10.277453115519068 |
| Pt | -4.173298214209943  | -5.607128731646941  | 10.277453115519068 |
| Pt | -2.796793152421892  | -3.211079424644080  | 10.080273015859534 |
| Pt | -1.398036393444999  | -0.794411420515237  | 9.997885973590218  |
| Pt | -12.462325894596745 | -19.996558788909091 | 9.997885973590218  |
| Pt | -19.446241980921350 | -23.961574870472660 | 12.296385511366593 |
| Pt | -18.039922161860883 | -21.612028384982739 | 12.301005346631205 |
| Pt | -16.632136229071325 | -19.272974645797870 | 12.330708067977227 |
| Pt | -15.180928245133536 | -16.848654497286358 | 12.510514556899723 |
| Pt | -13.772732041562779 | -14.360156901558550 | 12.500097626691389 |
| Pt | -12.413137097280828 | -11.968865013763590 | 12.330708067977227 |
| Pt | -11.084412861733812 | -9.604824775882260  | 12.312313476531530 |
| Pt | -9.743246643302189  | -7.201338057724739  | 12.320857081101410 |
| Pt | -20.848181155295300 | -26.370159091358758 | 12.330708067977227 |
| Pt | -15.249179444023856 | -21.605703706615564 | 12.312313476531530 |
| Pt | -13.838562219340492 | -19.240229767132263 | 12.320857081101410 |
| Pt | -12.414702243338839 | -16.800389768809051 | 12.334434968343855 |
| Pt | -11.028211562026666 | -14.387272065204529 | 12.296385511366593 |
| Pt | -9.683564170688243  | -12.018516524326438 | 12.301005346631205 |
| Pt | -8.342213210338791  | -9.654356966804622  | 12.334434968343855 |
| Pt | -7.000898690400207  | -7.234602613848317  | 12.510514556899723 |
| Pt | -5.624100539113243  | -4.747457376035396  | 12.500097626691389 |
| Pt | -16.663175405374925 | -23.955752170066116 | 12.334434968343855 |
| Pt | -11.086498554542333 | -19.199970423902176 | 12.312313476531530 |
| Pt | -9.696604527750788  | -16.779953997090661 | 12.301005346631205 |
| Pt | -8.315575747149149  | -14.402999688253548 | 12.266756264044020 |
| Pt | -19.419000938699352 | -19.263151816683305 | 12.296385511366593 |
| Pt | -18.023258278376527 | -16.899884939145508 | 12.500097626691389 |
| Pt | -4.157787872950850  | -7.201499843046451  | 12.579241508436011 |
| Pt | -2.764900304666431  | -4.722742263965524  | 12.510514556899723 |
| Pt | -1.364918377557230  | -2.364431550242839  | 12.320857081101410 |
| Pt | 0.000000000000000   | 0.000000000000000   | 12.281683536306655 |
| O  | -20.591635490222487 | -23.498984434636601 | 15.211364699298004 |
| O  | -15.995395218563583 | -20.164683052927888 | 15.252968759303455 |
| O  | -19.246919259272211 | -20.486387041332666 | 15.211364699298004 |
| O  | -11.455807357239472 | -16.680236591372299 | 15.188668995010783 |
| O  | -14.768798821196189 | -17.099788175736883 | 14.770224081411602 |
| O  | -17.980900807563316 | -17.415027027469208 | 14.817476130915949 |
| O  | -10.054899628623943 | -13.626627477313233 | 15.211364699298004 |
| O  | -13.347784650652940 | -14.065903343418135 | 14.817476130915949 |
| O  | -16.631151459372791 | -14.402999755260744 | 15.020248154880010 |
| O  | -8.717604840867779  | -10.544860957736745 | 15.188668995010783 |
| O  | -11.959265472930131 | -10.971577049812710 | 15.252968759303455 |
| O  | -2.753476876338498  | -4.240261005030616  | 14.770224081411602 |
| O  | -7.424451439136321  | -7.465950395254347  | 14.770224081411602 |
| O  | -10.700633402607874 | -7.896372396660224  | 15.157288385743893 |
| O  | -1.488142282157345  | -1.187793197988484  | 15.157288385743893 |
| O  | -6.091405299802195  | -4.526569049654615  | 14.817476130915949 |
| O  | -21.938793684130118 | -26.475738846220867 | 15.252968759303455 |
| O  | -17.246678558663760 | -23.185401558212696 | 15.188668995010783 |
| O  | -12.757951453152970 | -19.721833982093102 | 15.157288385743893 |

|    |                     |                     |                    |
|----|---------------------|---------------------|--------------------|
| Zn | -22.149394267252440 | -24.591789698490572 | 14.935030555531441 |
| Zn | -17.521642737152742 | -21.289042821860772 | 14.935030555531441 |
| Zn | -8.315575780827212  | -14.402999619839255 | 14.917745891873009 |
| Zn | -12.898595926602468 | -17.866869641183673 | 14.785334730533997 |
| Zn | -16.264613337176097 | -18.367159229612732 | 14.799744886230712 |
| Zn | -7.076201714107772  | -11.445248827428587 | 14.867738357491167 |
| Zn | -11.496750138478916 | -14.808545589486402 | 14.867738357491167 |
| Zn | -14.889370746405525 | -15.191862421330120 | 14.824642200590505 |
| Zn | -5.711853524208382  | -8.315494779647054  | 14.824642200590505 |
| Zn | -10.222417579523626 | -11.731166028926694 | 14.935030555531441 |
| Zn | -13.381357697300707 | -12.103488431379510 | 14.799744886230712 |
| Zn | -4.345503071867551  | -5.298641971040387  | 14.824642200590505 |
| Zn | -9.023865141821373  | -8.702052739770505  | 14.785334730533997 |
| Zn | -12.189706336338503 | -9.088324812383155  | 14.914505111238723 |
| Zn | -3.024266276552426  | -2.237076795384412  | 14.785334730533997 |
| Zn | -7.774119929352104  | -5.536851356985956  | 14.799744886230712 |
| Zn | -23.454517520552084 | -27.616932346749252 | 14.914505111238723 |
| Zn | -18.847139109994860 | -24.156704287842942 | 14.867738357491167 |
| Zn | -14.249230725791222 | -20.906741389425772 | 14.914505111238723 |

### 9/16 Cu

|    |                     |                    |                     |
|----|---------------------|--------------------|---------------------|
|    | 10.2106219202999995 | 0.0000000000000000 | 0.0000000000000000  |
|    | -5.1053109601999997 | 8.8426579713999995 | 0.0000000000000000  |
|    | 0.0000000000000000  | 0.0000000000000000 | 18.5527257741999989 |
| Cu | -3.828983220100012  | 6.631993478600013  | 2.0000000000000057  |
| Cu | -2.552655480100000  | 4.421328985700000  | 2.0000000000000057  |
| Cu | -1.276327739999982  | 6.631993478600013  | 2.0000000000000057  |
| Cu | -1.276327740000012  | 2.210664492900013  | 2.0000000000000057  |
| Cu | 0.000000000000030   | 4.421328985700000  | 2.0000000000000057  |
| Cu | 1.276327740000000   | 6.631993478600013  | 2.0000000000000057  |
| Cu | 0.000000000000000   | 0.000000000000000  | 2.0000000000000057  |
| Cu | 1.276327739999970   | 2.210664492900013  | 2.0000000000000057  |
| Cu | 2.552655480099987   | 4.421328985700000  | 2.0000000000000057  |
| Cu | 3.828983220099957   | 6.631993478600013  | 2.0000000000000057  |
| Cu | 2.552655480100030   | 0.000000000000000  | 2.0000000000000057  |
| Cu | 3.828983220100000   | 2.210664492900013  | 2.0000000000000057  |
| Cu | 5.105310960200017   | 4.421328985700000  | 2.0000000000000057  |
| Cu | 5.105310960199987   | 0.000000000000000  | 2.0000000000000057  |
| Cu | 6.381638700199957   | 2.210664492900013  | 2.0000000000000057  |
| Cu | 7.657966440300017   | 0.000000000000000  | 2.0000000000000057  |
| Cu | -2.546220819667711  | 7.365166589967322  | 4.062943471260583   |
| Cu | -1.260686302822757  | 5.167247737964803  | 4.096947403815631   |
| Cu | 0.000000000000080   | 7.350820466970418  | 4.096947403815631   |
| Cu | -0.000000000000022  | 2.954982762965377  | 4.062943471260583   |
| Cu | 1.260686302822654   | 5.167247737964803  | 4.096947403815631   |
| Cu | 2.546220819667785   | 7.365166589967322  | 4.062943471260583   |
| Cu | 1.271771468898630   | 0.734257599953106  | 4.043011887447451   |
| Cu | 2.534847400933457   | 2.953757233717304  | 4.046290795321661   |
| Cu | 3.814705859546378   | 5.170537110642095  | 4.046290795321661   |
| Cu | 5.105310960199936   | 7.374142771593814  | 4.043011887447451   |
| Cu | 3.825452501487182   | 0.718363627040600  | 4.046290795321661   |
| Cu | 5.105310960200008   | 2.947552657099991  | 4.034938353516064   |
| Cu | 6.395916060753482   | 5.170537110642095  | 4.046290795321661   |
| Cu | 6.385169418813036   | 0.718363627040600  | 4.046290795321661   |
| Cu | 7.675774519466487   | 2.953757233717304  | 4.046290795321661   |
| Cu | 8.938850451401409   | 0.734257599953106  | 4.043011887447451   |
| Cu | -3.827168976461645  | 8.104722353147046  | 6.071500847417077   |
| Cu | -2.531168699517027  | 5.904845930882308  | 6.125706147510538   |
| Cu | -1.274019971117213  | 8.082291401078475  | 6.125706147510538   |
| Cu | -1.257148728299760  | 3.698178610939245  | 6.125706147510538   |
| Cu | -0.000000000000033  | 5.895105314300008  | 6.260532004952880   |
| Cu | 1.274019971117444   | 8.082291401078475  | 6.125706147510538   |
| Cu | -0.000000000000002  | 1.475871236705959  | 6.071500847417077   |

|    |                    |                    |                    |
|----|--------------------|--------------------|--------------------|
| Cu | 1.257148728299584  | 3.698178610939245  | 6.125706147510538  |
| Cu | 2.531168699516922  | 5.904845930882308  | 6.125706147510538  |
| Cu | 3.827168976461621  | 8.104722353147046  | 6.071500847417077  |
| Cu | 2.544347555828377  | 1.468979746285394  | 6.045490712858846  |
| Cu | 3.815110842878091  | 3.692450042123330  | 6.026089999987105  |
| Cu | 5.105310960199977  | 5.904698478929237  | 6.045490712858846  |
| Cu | 5.105310960200089  | 1.457757887153343  | 6.026089999987105  |
| Cu | 6.395511077421798  | 3.692450042123330  | 6.026089999987105  |
| Cu | 7.666274364571674  | 1.468979746285394  | 6.045490712858846  |
| Cu | -3.857887096099497 | 6.633606397964724  | 8.105806416765256  |
| Cu | -2.589837965033897 | 4.399861668014248  | 8.116648179286919  |
| Cu | -1.321345187341054 | 6.657984313940473  | 8.316723948728299  |
| Cu | -1.289382848855506 | 2.184826542334329  | 8.105806416765256  |
| Cu | 0.0000000000000324 | 4.369347315019081  | 8.316723948728299  |
| Cu | 1.321345187340778  | 6.657984313940473  | 8.316723948728299  |
| Cu | 0.0000000000000000 | 0.0000000000000000 | 8.103774378027691  |
| Cu | 1.289382848855755  | 2.184826542334329  | 8.105806416765256  |
| Cu | 2.589837965034127  | 4.399861668014248  | 8.116648179286919  |
| Cu | 3.857887096099424  | 6.633606397964724  | 8.105806416765256  |
| Cu | 2.536806712956056  | 0.024225031200974  | 8.105806416765256  |
| Cu | 3.837724299826384  | 2.215711157633055  | 8.018342809602256  |
| Cu | 5.105310960200073  | 4.411235656233918  | 8.018342809602256  |
| Cu | 5.105310960199743  | 0.042934635371503  | 8.116648179286919  |
| Cu | 6.372897620473517  | 2.215711157633055  | 8.018342809602256  |
| Cu | 7.673815207443717  | 0.024225031200974  | 8.105806416765256  |
| O  | 1.711494181945102  | 0.988131624619847  | 10.721707397802536 |
| O  | -0.000000100400109 | 3.949591600598747  | 10.563064991215022 |
| O  | -1.684864348016263 | 6.867862081200592  | 10.563064991215022 |
| O  | 5.105310859800011  | 0.981023661298470  | 10.728702713857203 |
| O  | 3.402246844017104  | 3.930817065150763  | 10.728702713857203 |
| O  | 1.684864147216342  | 6.867862081200592  | 10.563064991215022 |
| O  | 8.499127537654772  | 0.988131624619847  | 10.721707397802536 |
| O  | 6.808374875482887  | 3.930817065150763  | 10.728702713857203 |
| O  | 5.105310859800072  | 6.866394542260339  | 10.721707397802536 |
| Zn | -0.000000001699813 | 1.928079433720330  | 10.485241120248574 |
| Zn | -1.730637774878005 | 4.895921189994612  | 10.549323403562633 |
| Zn | -3.435545243643980 | 7.878618344489819  | 10.485241120248574 |
| Zn | 3.406459357293348  | 1.966720287838791  | 10.589318522020323 |
| Zn | 1.730637771478118  | 4.895921189994612  | 10.549323403562633 |
| Zn | -0.000000001700207 | 7.893473742610781  | 10.549323403562633 |
| Zn | 6.804162559606587  | 1.966720287838791  | 10.589318522020323 |
| Zn | 5.105310958500005  | 4.909217575522486  | 10.589318522020323 |
| Zn | 3.435545240243806  | 7.878618344489819  | 10.485241120248574 |

### 31/52 Cu

|    |                      |                     |                     |
|----|----------------------|---------------------|---------------------|
|    | 12.7632774003999998  | 13.2639869572000002 | 0.0000000000000000  |
|    | -17.8685883606000004 | 4.4213289856999998  | 0.0000000000000000  |
|    | 0.0000000000000000   | 0.0000000000000000  | 19.5527034153000017 |
| Cu | -15.315932879749502  | 4.421328986145987   | 5.500000000852932   |
| Cu | -14.039605140987446  | 6.631993478569199   | 5.500000000852932   |
| Cu | -12.763277399162146  | 8.842657971876694   | 5.500000000852932   |
| Cu | -12.763277400175481  | 4.421328985265583   | 5.500000000852932   |
| Cu | -11.486949660137075  | 6.631993479015218   | 5.500000000852932   |
| Cu | -10.210621921374891  | 8.842657971438397   | 5.500000000852932   |
| Cu | -8.934294179549504   | 11.053322464745987  | 5.500000000852932   |
| Cu | -7.657966440787446   | 13.263986957169198  | 5.500000000852932   |
| Cu | -6.381638698962147   | 15.474651450476694  | 5.500000000852932   |
| Cu | -10.210621919325110  | 4.421328985711602   | 5.500000000852932   |
| Cu | -8.934294180562926   | 6.631993478134782   | 5.500000000852932   |
| Cu | -7.657966440524519   | 8.842657971884417   | 5.500000000852932   |
| Cu | -6.381638699975482   | 11.053322463865582  | 5.500000000852932   |
| Cu | -5.105310959937075   | 13.263986957615217  | 5.500000000852932   |
| Cu | -3.828983221174891   | 15.474651450038397  | 5.500000000852932   |

|    |                     |                    |                   |
|----|---------------------|--------------------|-------------------|
| Cu | -8.934294180300000  | 2.210664492850000  | 5.500000000852932 |
| Cu | -7.657966441537854  | 4.421328985273306  | 5.500000000852932 |
| Cu | -6.381638699712556  | 6.631993478580801  | 5.500000000852932 |
| Cu | -5.105310960950498  | 8.842657971004012  | 5.500000000852932 |
| Cu | -3.828983219125110  | 11.053322464311602 | 5.500000000852932 |
| Cu | -2.552655480362926  | 13.263986956734783 | 5.500000000852932 |
| Cu | -1.276327740324520  | 15.474651450484416 | 5.500000000852932 |
| Cu | -6.381638699449501  | 2.210664493295987  | 5.500000000852932 |
| Cu | -5.105310960687445  | 4.421328985719199  | 5.500000000852932 |
| Cu | -3.828983218862146  | 6.631993479026693  | 5.500000000852932 |
| Cu | -2.552655480100000  | 8.842657971450000  | 5.500000000852932 |
| Cu | -1.276327741337854  | 11.053322463873306 | 5.500000000852932 |
| Cu | 0.000000000487445   | 13.263986957180801 | 5.500000000852932 |
| Cu | 1.276327739249503   | 15.474651449604014 | 5.500000000852932 |
| Cu | -3.828983219875481  | 2.210664492415583  | 5.500000000852932 |
| Cu | -2.552655479837074  | 4.421328986165218  | 5.500000000852932 |
| Cu | -1.276327741074892  | 6.631993478588399  | 5.500000000852932 |
| Cu | 0.000000000750499   | 8.842657971895987  | 5.500000000852932 |
| Cu | 1.276327739512554   | 11.053322464319200 | 5.500000000852932 |
| Cu | 2.552655481337853   | 13.263986957626694 | 5.500000000852932 |
| Cu | -1.276327739025108  | 2.210664492861602  | 5.500000000852932 |
| Cu | -0.000000000262926  | 4.421328985284783  | 5.500000000852932 |
| Cu | 1.276327739775481   | 6.631993479034417  | 5.500000000852932 |
| Cu | 2.552655480324518   | 8.842657971015583  | 5.500000000852932 |
| Cu | 3.828983220362926   | 11.053322464765218 | 5.500000000852932 |
| Cu | 5.105310959125108   | 13.263986957188399 | 5.500000000852932 |
| Cu | 0.000000000000000   | 0.000000000000000  | 5.500000000852932 |
| Cu | 1.276327738762146   | 2.210664492423306  | 5.500000000852932 |
| Cu | 2.552655480587445   | 4.421328985730801  | 5.500000000852932 |
| Cu | 3.828983219349501   | 6.631993478154014  | 5.500000000852932 |
| Cu | 5.105310961174891   | 8.842657971461602  | 5.500000000852932 |
| Cu | 6.381638699937074   | 11.053322463884783 | 5.500000000852932 |
| Cu | 7.657966439975480   | 13.263986957634417 | 5.500000000852932 |
| Cu | 6.381638700200000   | 6.631993478600000  | 5.500000000852932 |
| Cu | 7.657966438962147   | 8.842657971023307  | 5.500000000852932 |
| Cu | 8.934294180787445   | 11.053322464330801 | 5.500000000852932 |
| Cu | 10.210621919549501  | 13.263986956754014 | 5.500000000852932 |
| Cu | -14.041181367315501 | 5.167487821635743  | 7.553958470356290 |
| Cu | -12.772704852152696 | 7.384900010275252  | 7.589622692331504 |
| Cu | -11.502930870099142 | 9.575367734008129  | 7.579120041973680 |
| Cu | -11.497542798490887 | 5.176719696820228  | 7.544733017233415 |
| Cu | -10.225742210162196 | 7.384521377056236  | 7.557183169189916 |
| Cu | -8.929304076822820  | 9.581519901657606  | 7.545897664517518 |
| Cu | -7.636646195640541  | 11.790133281883580 | 7.544733017233415 |
| Cu | -6.372821949663082  | 13.997604838124449 | 7.553958470356290 |
| Cu | -5.111422405272117  | 16.203975262641517 | 7.548246084041399 |
| Cu | -8.938498563486116  | 5.161551823426436  | 7.545897664517518 |
| Cu | -7.657966441287821  | 7.368881642571885  | 7.544343952349079 |
| Cu | -6.360534148202825  | 9.584820823724179  | 7.557183169189916 |
| Cu | -5.086724921221716  | 11.790365857568982 | 7.589622692331504 |
| Cu | -3.833193011366481  | 13.981689232499077 | 7.580422004236460 |
| Cu | -2.560853836919442  | 16.192558907641267 | 7.546111561428426 |
| Cu | -7.646357233374649  | 2.935801724412967  | 7.579120041973680 |
| Cu | -6.387622962434986  | 5.137302727819584  | 7.557183169189916 |
| Cu | -5.106096680491063  | 7.363573203515955  | 7.545897664517518 |
| Cu | -3.824611217326210  | 9.595475470178904  | 7.579120041973680 |
| Cu | -2.562799448104933  | 11.793175218892712 | 7.603384667560671 |
| Cu | -1.287966995721796  | 13.984544005883073 | 7.561484331296468 |
| Cu | -0.003750623044070  | 16.207841171776249 | 7.531518961858120 |
| Cu | -5.114469547425605  | 2.931379060755761  | 7.589622692331504 |
| Cu | -3.839710326668567  | 5.139791949896193  | 7.544733017233415 |
| Cu | -2.563101142889915  | 7.378566822401274  | 7.538531082382974 |
| Cu | -1.291721004479238  | 9.602529452636453  | 7.562943911840971 |

|    |                     |                    |                   |
|----|---------------------|--------------------|-------------------|
| Cu | -0.011794133293145  | 11.797708002973987 | 7.562082687947906 |
| Cu | 1.285814495264789   | 13.998645682589551 | 7.538161578146462 |
| Cu | -10.197011477436833 | 2.951756276710093  | 7.538531082382974 |
| Cu | -2.559896003821422  | 2.941552268839807  | 7.553958470356290 |
| Cu | -1.271249483335587  | 5.156818236478959  | 7.531518961858120 |
| Cu | -0.002812626929146  | 7.378212133361938  | 7.538161578146462 |
| Cu | 1.267531112834615   | 9.588792295407774  | 7.546456442516229 |
| Cu | 2.565061202816240   | 11.793205651391935 | 7.546456442516229 |
| Cu | 3.856583988608472   | 14.002714421061121 | 7.562943911840971 |
| Cu | 0.020536952570854   | 2.949943025230918  | 7.546111561428426 |
| Cu | 1.296290527041411   | 5.156302817172150  | 7.561484331296468 |
| Cu | 2.552059630043002   | 7.354918936667898  | 7.562082687947906 |
| Cu | 3.825374124549144   | 9.567304953300294  | 7.546456442516229 |
| Cu | 5.117700943450138   | 11.796675960458110 | 7.562082687947906 |
| Cu | 6.389278094691274   | 14.008177760315501 | 7.603384667560671 |
| Cu | -16.582653977301138 | 5.156706659142660  | 7.548246084041399 |
| Cu | 2.571375842923868   | 2.953499815500010  | 7.580422004236460 |
| Cu | 3.831487793613663   | 5.147949920891786  | 7.603384667560671 |
| Cu | 5.093103456070766   | 7.344059026402419  | 7.562943911840971 |
| Cu | 6.374964571864357   | 9.572445084148514  | 7.538161578146462 |
| Cu | 7.649642905816926   | 11.808456076160438 | 7.561484331296468 |
| Cu | 8.919783608642607   | 14.014113852100911 | 7.580422004236460 |
| Cu | -10.213786700473253 | 11.776321829488634 | 7.538531082382974 |
| Cu | 8.932966546579664   | 9.584643491844794  | 7.531518961858120 |
| Cu | 10.198283324548594  | 11.806800967227815 | 7.546111561428426 |
| Cu | -1.279822938226750  | 0.745963006815821  | 7.548246084041399 |
| Cu | -15.309872858013533 | 5.900615282188689  | 9.610854733070973 |
| Cu | -14.035732106004211 | 8.108981838319732  | 9.734086148394697 |
| Cu | 5.094236399644166   | 5.877155811006624  | 9.688551254747711 |
| Cu | -12.776205804617803 | 5.909041360765739  | 9.611369682131439 |
| Cu | -11.498556661254543 | 8.112268960057889  | 9.661800884713211 |
| Cu | -10.212663220772782 | 10.303592769025222 | 9.583870327145606 |
| Cu | -8.928876193116629  | 12.525435622591072 | 9.530421052184758 |
| Cu | -7.658850644372958  | 14.751088637407126 | 9.546695966687052 |
| Cu | 11.481072741441929  | 12.538331715183094 | 9.565510833821353 |
| Cu | -10.219242691203851 | 5.909188380656543  | 9.569056930862615 |
| Cu | -8.935841911773686  | 8.109460357914180  | 9.571066774586848 |
| Cu | -7.641459761605177  | 10.316858573394018 | 9.569056930862615 |
| Cu | -6.363105526582581  | 12.531327097422785 | 9.611369682131439 |
| Cu | -5.103569199263672  | 14.729760168357785 | 9.610854733070973 |
| Cu | -3.835772756744898  | 16.937721756399540 | 9.565510833821353 |
| Cu | -8.922152438034525  | 3.689093768902748  | 9.583870327145606 |
| Cu | -7.660388685245904  | 5.891919664144652  | 9.571066774586848 |
| Cu | -6.377668723780411  | 8.105264906541166  | 9.571066774586848 |
| Cu | -5.093879028234931  | 10.323236681173427 | 9.661800884713211 |
| Cu | -3.828138036791183  | 12.522138631054428 | 9.734086148394697 |
| Cu | -2.563366635630484  | 14.712914942066933 | 9.614805696215033 |
| Cu | -14.050703131478921 | 3.677012402379745  | 9.546695966687052 |
| Cu | -6.381463631310536  | 3.671139287368681  | 9.661800884713211 |
| Cu | -5.113196867990967  | 5.880597974549440  | 9.569056930862615 |
| Cu | -3.839083661992697  | 8.113958390672034  | 9.583870327145606 |
| Cu | -2.562662925691416  | 10.334999902419028 | 9.688551254747711 |
| Cu | -1.291135181886620  | 12.517959248010669 | 9.661637971178452 |
| Cu | 0.000356865018304   | 14.725292240977611 | 9.546403780000340 |
| Cu | -11.488218306267251 | 3.689964521119729  | 9.530421052184758 |
| Cu | -3.834587986536162  | 3.666276471295815  | 9.611369682131439 |
| Cu | -2.556804821416117  | 5.891244784889201  | 9.530421052184758 |
| Cu | -1.287338744945030  | 8.121462589490809  | 9.557480705465297 |
| Cu | -0.013767592772773  | 10.331696818935045 | 9.599280140150483 |
| Cu | 1.283206012648057   | 12.524190088179292 | 9.564614701318972 |
| Cu | 2.571751330654262   | 14.739452704551640 | 9.557480705465297 |
| Cu | -1.264345544948114  | 3.678543888813131  | 9.546695966687052 |
| Cu | 0.010621809057944   | 5.901649890885739  | 9.546403780000340 |



|    |                     |                    |                    |
|----|---------------------|--------------------|--------------------|
| Cu | 1.275407615890219   | 8.113180918355349  | 9.564614701318972  |
| Cu | 2.552655481087820   | 10.316434300328114 | 9.560896480206909  |
| Cu | 3.849084745580486   | 12.531390618520579 | 9.599280140150483  |
| Cu | 5.126392966247247   | 14.737147186674340 | 9.688551254747711  |
| Cu | 0.012666455502969   | 1.473249428517365  | 9.565510833821353  |
| Cu | 1.303202614669727   | 3.687588860499436  | 9.614805696215033  |
| Cu | 2.567974279031028   | 5.886851465963226  | 9.661637971178452  |
| Cu | 3.822649287392291   | 8.086215462644383  | 9.599280140150483  |
| Cu | 5.099352811661715   | 10.311931893565355 | 9.564614701318972  |
| Cu | 6.381127343055586   | 12.544492186126105 | 9.661637971178452  |
| Cu | -5.110029178004607  | 1.475524459225843  | 9.734086148394697  |
| Cu | 6.373553854490764   | 8.088387606057552  | 9.557480705465297  |
| Cu | 7.646987766123757   | 10.322360768236653 | 9.546403780000340  |
| Cu | 8.918130461160752   | 12.548799097533630 | 9.614805696215033  |
| Cu | -2.560457263522795  | 1.476269478053528  | 9.610854733070973  |
| Cu | -15.321915048620721 | 4.393357431690246  | 11.594382802776341 |
| Cu | -14.061181697217791 | 6.572111344733680  | 11.741413207288570 |
| Cu | -12.731795512945093 | 8.833151443640055  | 11.833658554003238 |
| Cu | -12.765195950704207 | 4.386621079151494  | 11.566430794859922 |
| Cu | -11.480385898510386 | 6.589224249498992  | 11.664304042167483 |
| Cu | -10.168772635112678 | 8.842233533149967  | 11.662081011365558 |
| Cu | -8.923677860953482  | 11.070099806142768 | 11.567620969156028 |
| Cu | -7.687065093930041  | 13.283002423722571 | 11.566430794859922 |
| Cu | -6.402871691268544  | 15.493817937916774 | 11.594382802776341 |
| Cu | -10.230459682480701 | 4.422134316612042  | 11.567620969156028 |
| Cu | -8.935718091847221  | 6.635639783102128  | 11.603346855187532 |
| Cu | -7.654096692150708  | 8.842067962745681  | 11.603346855187532 |
| Cu | -6.421959820050151  | 11.069022694310604 | 11.664304042167483 |
| Cu | -5.146382130956267  | 13.312613870354660 | 11.741413207288570 |
| Cu | -3.824416938298752  | 15.498104730258113 | 11.648764619065503 |
| Cu | -8.978223814780426  | 2.243571253724611  | 11.637283325367626 |
| Cu | -7.678523510328850  | 4.457783749450856  | 11.662081011365558 |
| Cu | -6.384084536802072  | 6.628937182752198  | 11.603346855187532 |
| Cu | -5.126603178421710  | 8.806627645114890  | 11.662081011365558 |
| Cu | -3.852957057188354  | 11.030811615206892 | 11.833658554003238 |
| Cu | -2.505585591581454  | 13.295183898185581 | 11.780411075148315 |
| Cu | -1.246260783173701  | 15.483906895588465 | 11.575079400273658 |
| Cu | -6.389146747603318  | 2.242681870637337  | 11.833658554003238 |
| Cu | -5.071553602239463  | 4.448397984790406  | 11.664304042167483 |
| Cu | -3.819761774302585  | 6.614410806729472  | 11.567620969156028 |
| Cu | -2.559188753733447  | 8.788160411573678  | 11.637283325367626 |
| Cu | -1.241874737706512  | 11.024108082487846 | 11.755919642347250 |
| Cu | 0.043822895468541   | 13.280224978610192 | 11.608317083103394 |
| Cu | 1.273631686971598   | 15.485607204671329 | 11.546586615077432 |
| Cu | -3.766335492625935  | 2.221919713511658  | 11.741413207288570 |
| Cu | -2.521638276165755  | 4.437021425725932  | 11.566430794859922 |
| Cu | -1.284467677141876  | 6.624180751292151  | 11.546586615077432 |
| Cu | -0.005503368442106  | 8.827635180454285  | 11.591455058189579 |
| Cu | 1.298132324687782   | 11.056451070687030 | 11.615457103667692 |
| Cu | 2.542397046909885   | 13.276264410874743 | 11.591455058189579 |
| Cu | -1.249112577847495  | 2.219469559877258  | 11.594382802776341 |
| Cu | -0.023048929421777  | 4.442740011439875  | 11.575079400273658 |
| Cu | 1.240353753219875   | 6.661826208640743  | 11.608317083103394 |
| Cu | 2.539043735143919   | 8.859976992512403  | 11.615457103667692 |
| Cu | 3.820790380368299   | 11.032874836900572 | 11.615457103667692 |
| Cu | 5.062784060873798   | 13.248756971499718 | 11.755919642347251 |
| Cu | 0.000000000000000   | 0.000000000000000  | 11.609694724203401 |
| Cu | 1.253733460851736   | 2.202892369285058  | 11.648764619065503 |
| Cu | 2.502103192379936   | 4.446494234443479  | 11.780411075148315 |
| Cu | 3.837057113969480   | 6.676437845228160  | 11.755919642347251 |
| Cu | 5.121072764795451   | 8.845403309655243  | 11.591455058189579 |
| Cu | 6.373789791511582   | 11.007251712849063 | 11.608317083103394 |
| Cu | 7.661448839401515   | 13.207624767470934 | 11.780411075148315 |

|    |                     |                    |                    |
|----|---------------------|--------------------|--------------------|
| Cu | 6.432101608313867   | 6.653584277601710  | 11.637283325367626 |
| Cu | 7.668802427307032   | 8.839514943252235  | 11.546586615077432 |
| Cu | 8.927276152795477   | 11.022655993071663 | 11.575079400273658 |
| Cu | 10.228649914583773  | 13.248305799672551 | 11.648764619065503 |
| O  | -0.249856686815082  | 16.298460356516955 | 14.387487794847564 |
| O  | -11.128727760591795 | 5.768643468905509  | 14.294882271474481 |
| O  | -9.216816535333631  | 8.474040099710864  | 14.283647351997358 |
| O  | -7.308432816961645  | 11.174768169236042 | 14.294882271474481 |
| O  | -5.444817966726918  | 13.875180109728717 | 14.182195904989838 |
| O  | -9.716151186204792  | 2.763442880597285  | 14.315896898050777 |
| O  | -7.835636784483569  | 5.466298723388343  | 14.283647351997358 |
| O  | -5.921446220000695  | 8.166306162978026  | 14.283647351997358 |
| O  | -4.025169767576507  | 10.882916815203579 | 14.098728614619301 |
| O  | -2.149295726660464  | 13.591504761831370 | 14.139713163199733 |
| O  | -6.431121173677212  | 2.465769816876968  | 14.098728614619299 |
| O  | -4.536738962264364  | 5.163233347935773  | 14.294882271474481 |
| O  | -2.640447196516152  | 7.889160840299598  | 14.315896898050777 |
| O  | -0.747283786107568  | 10.620350561966204 | 14.161389802664125 |
| O  | 1.166554390611148   | 13.318856097315813 | 14.324315866486060 |
| O  | -3.129921046232655  | 2.199089574515254  | 14.182195904989838 |
| O  | -1.226675059911845  | 4.898374631052631  | 14.387487794847564 |
| O  | 0.645532383066536   | 7.614824735905741  | 14.324315866486060 |
| O  | 2.552655406039679   | 10.316434318897713 | 14.335632753594769 |
| O  | 4.465824190508899   | 13.022307370033831 | 14.161389802664125 |
| O  | 0.178794003502718   | 1.903505277824853  | 14.303400106645791 |
| O  | 2.067336771924741   | 4.606889966948271  | 14.139713163199733 |
| O  | 3.939425815504418   | 7.306645024250781  | 14.161389802664125 |
| O  | 5.845879448015047   | 10.015622122587212 | 14.324315866486060 |
| O  | 7.739925176428573   | 12.750908227029100 | 14.139713163199733 |
| O  | -3.546224159431951  | 16.578723119980943 | 14.303400106645791 |
| O  | -14.399160525071444 | 6.032375301391119  | 14.182195904989838 |
| O  | -12.517608599840415 | 8.757958352670236  | 14.098728614619299 |
| O  | -10.617301158373348 | 11.454041263854055 | 14.315896898050777 |
| O  | 9.134497968419524   | 9.752467968239209  | 14.387487794847564 |
| O  | 11.025396377621956  | 12.467074558002970 | 14.303400106645791 |
| Zn | -12.832127122408838 | 4.916596171244239  | 14.157918486881016 |
| Zn | -10.920554242092642 | 7.651730388204349  | 14.074275892925732 |
| Zn | -9.044918001001665  | 10.370994442462038 | 14.145867943967495 |
| Zn | -7.194627489361933  | 13.075979008932199 | 14.157918486881016 |
| Zn | -5.279589578381326  | 15.804229753718001 | 14.053978240336466 |
| Zn | -9.564396514670630  | 4.666689865248538  | 14.145867943967495 |
| Zn | -7.657966366239680  | 7.368881624002285  | 14.032124247067516 |
| Zn | -5.781718214872796  | 10.052941224911915 | 14.074275892925732 |
| Zn | -3.883578666335515  | 12.795955375646162 | 14.073428528430854 |
| Zn | -1.970064972006860  | 15.522218707025035 | 14.129739732896123 |
| Zn | -6.271626645327295  | 4.401973259774976  | 14.074275892925732 |
| Zn | -4.364584584833452  | 7.068960564738610  | 14.145867943967495 |
| Zn | -2.451988746001539  | 9.763695451462304  | 14.087093695296334 |
| Zn | -0.544657934730086  | 12.525738538350751 | 14.081543081387654 |
| Zn | 1.313811448848458   | 15.220087775877774 | 14.195191012759075 |
| Zn | -2.947144490522089  | 4.114069692714827  | 14.157918486881016 |
| Zn | -1.074610892843289  | 6.791737067786528  | 14.195191012759075 |
| Zn | 0.843996166281463   | 9.506274596483454  | 14.060321793062897 |
| Zn | 2.705366378663583   | 12.201256558446103 | 14.060321793062897 |
| Zn | 4.576291834680077   | 14.926952795484706 | 14.087093695296334 |
| Zn | 0.305674255942573   | 3.796751198862604  | 14.129739732896123 |
| Zn | 2.187998685311340   | 6.529429988214411  | 14.081543081387654 |
| Zn | 4.108604114272856   | 9.241771687693204  | 14.060321793062897 |
| Zn | 6.014625908636558   | 11.894134316057507 | 14.081543081387654 |
| Zn | -4.845176482120157  | 1.386629115445621  | 14.073428528430854 |
| Zn | -16.152380530777059 | 5.210942278971815  | 14.053978240336466 |
| Zn | -14.245143953836930 | 7.924060381799421  | 14.073428528430854 |
| Zn | 5.533663571815749   | 6.258654597002044  | 14.087093695296334 |

Zn 7.418766104488950 8.937478000284916 14.195191012759075  
Zn 9.322357373495297 11.630332937177267 14.129739732896123  
Zn -1.541928993134351 1.091472840201421 14.053978240336466

**49/64 Ag**

23.1365338804238370 0.0000000000000000 0.0000000000000000  
11.5682669402119185 20.0368260959663935 0.0000000000000000  
0.0000000000000000 0.0000000000000000 20.3840878029567101  
Ag 0.0000000000000000 0.0000000000000000 5.499999999999975  
Ag 1.446033367526490 2.504603261995799 5.499999999999975  
Ag 2.892066735052980 5.009206523991598 5.499999999999975  
Ag 4.338100102579469 7.513809785987398 5.499999999999975  
Ag 5.784133470105959 10.018413047983197 5.499999999999975  
Ag 7.230166837632449 12.523016309978996 5.499999999999975  
Ag 8.676200205158938 15.027619571974796 5.499999999999975  
Ag 10.122233572685429 17.532222833970593 5.499999999999975  
Ag 2.892066735052980 0.0000000000000000 5.499999999999975  
Ag 4.338100102579469 2.504603261995799 5.499999999999975  
Ag 5.784133470105959 5.009206523991598 5.499999999999975  
Ag 7.230166837632449 7.513809785987398 5.499999999999975  
Ag 8.676200205158938 10.018413047983197 5.499999999999975  
Ag 10.122233572685429 12.523016309978996 5.499999999999975  
Ag 11.568266940211918 15.027619571974796 5.499999999999975  
Ag 13.014300307738409 17.532222833970593 5.499999999999975  
Ag 5.784133470105959 0.0000000000000000 5.499999999999975  
Ag 7.230166837632449 2.504603261995799 5.499999999999975  
Ag 8.676200205158938 5.009206523991598 5.499999999999975  
Ag 10.122233572685428 7.513809785987398 5.499999999999975  
Ag 11.568266940211918 10.018413047983197 5.499999999999975  
Ag 13.014300307738409 12.523016309978996 5.499999999999975  
Ag 14.460333675264899 15.027619571974796 5.499999999999975  
Ag 15.906367042791388 17.532222833970593 5.499999999999975  
Ag 8.676200205158938 0.0000000000000000 5.499999999999975  
Ag 10.122233572685428 2.504603261995799 5.499999999999975  
Ag 11.568266940211918 5.009206523991598 5.499999999999975  
Ag 13.014300307738408 7.513809785987398 5.499999999999975  
Ag 14.460333675264899 10.018413047983197 5.499999999999975  
Ag 15.906367042791388 12.523016309978996 5.499999999999975  
Ag 17.352400410317877 15.027619571974796 5.499999999999975  
Ag 18.798433777844366 17.532222833970593 5.499999999999975  
Ag 11.568266940211918 0.0000000000000000 5.499999999999975  
Ag 13.014300307738408 2.504603261995799 5.499999999999975  
Ag 14.460333675264899 5.009206523991598 5.499999999999975  
Ag 15.906367042791388 7.513809785987398 5.499999999999975  
Ag 17.352400410317877 10.018413047983197 5.499999999999975  
Ag 18.798433777844366 12.523016309978996 5.499999999999975  
Ag 20.244467145370855 15.027619571974796 5.499999999999975  
Ag 21.690500512897348 17.532222833970593 5.499999999999975  
Ag 14.460333675264899 0.0000000000000000 5.499999999999975  
Ag 15.906367042791388 2.504603261995799 5.499999999999975  
Ag 17.352400410317877 5.009206523991598 5.499999999999975  
Ag 18.798433777844366 7.513809785987398 5.499999999999975  
Ag 20.244467145370859 10.018413047983197 5.499999999999975  
Ag 21.690500512897348 12.523016309978996 5.499999999999975  
Ag 23.136533880423837 15.027619571974796 5.499999999999975  
Ag 24.582567247950330 17.532222833970593 5.499999999999975  
Ag 17.352400410317877 0.0000000000000000 5.499999999999975  
Ag 18.798433777844366 2.504603261995799 5.499999999999975  
Ag 20.244467145370855 5.009206523991598 5.499999999999975  
Ag 21.690500512897344 7.513809785987398 5.499999999999975  
Ag 23.136533880423837 10.018413047983197 5.499999999999975  
Ag 24.582567247950326 12.523016309978996 5.499999999999975  
Ag 26.028600615476815 15.027619571974796 5.499999999999975

|    |                    |                    |                   |
|----|--------------------|--------------------|-------------------|
| Ag | 27.474633983003308 | 17.532222833970593 | 5.499999999999975 |
| Ag | 20.244467145370859 | 0.000000000000000  | 5.499999999999975 |
| Ag | 21.690500512897348 | 2.504603261995799  | 5.499999999999975 |
| Ag | 23.136533880423837 | 5.009206523991598  | 5.499999999999975 |
| Ag | 24.582567247950330 | 7.513809785987398  | 5.499999999999975 |
| Ag | 26.028600615476819 | 10.018413047983197 | 5.499999999999975 |
| Ag | 27.474633983003308 | 12.523016309978996 | 5.499999999999975 |
| Ag | 28.920667350529797 | 15.027619571974796 | 5.499999999999975 |
| Ag | 30.366700718056286 | 17.532222833970593 | 5.499999999999975 |
| Ag | 1.442038644347851  | 0.832561399496075  | 7.902165732973385 |
| Ag | 2.878772982603663  | 3.334395410863573  | 7.894910092417261 |
| Ag | 4.315569211084092  | 5.845710130756872  | 7.882223075553684 |
| Ag | 5.758068591909906  | 8.359895770909537  | 7.879328306894020 |
| Ag | 7.207419125569036  | 10.870244533184215 | 7.879328306894020 |
| Ag | 8.663518069358384  | 13.376578461999035 | 7.882223075553684 |
| Ag | 10.119982299443485 | 15.876537855871261 | 7.894910092417261 |
| Ag | 11.568266940211837 | 18.371703296974104 | 7.902165732973385 |
| Ag | 4.327057623371937  | 0.825892829231283  | 7.894910092417261 |
| Ag | 5.764918264274711  | 3.328377111735194  | 7.869356117629198 |
| Ag | 7.205752249479721  | 5.841168703691872  | 7.847060144752264 |
| Ag | 8.653944132376974  | 8.361527089597677  | 7.838624486503826 |
| Ag | 10.112542579763915 | 10.875877242694012 | 7.847060144752264 |
| Ag | 11.568266940211835 | 13.380071872495863 | 7.869356117629198 |
| Ag | 13.016551580980032 | 15.876537855871261 | 7.894910092417261 |
| Ag | 14.458435195073676 | 18.368186676018642 | 7.901680127808962 |
| Ag | 7.220318081937552  | 0.814537503210356  | 7.882223075553684 |
| Ag | 8.661476609927643  | 3.319780149580364  | 7.847060144752264 |
| Ag | 10.110590941216852 | 5.837352401577739  | 7.818405576176326 |
| Ag | 11.568266940211918 | 8.362121292810915  | 7.818405576176326 |
| Ag | 13.023991300659757 | 10.875877242694012 | 7.847060144752264 |
| Ag | 14.473015811065302 | 13.376578461999035 | 7.882223075553684 |
| Ag | 15.913818751962395 | 15.868092486375120 | 7.903861853859669 |
| Ag | 17.351272053603122 | 18.357834638324487 | 7.903861853859669 |
| Ag | 10.118916406552705 | 0.806685791872499  | 7.879328306894020 |
| Ag | 11.568266940211840 | 3.313771916770903  | 7.838624486503826 |
| Ag | 13.025942939206985 | 5.837352401577739  | 7.818405576176326 |
| Ag | 14.482589748046706 | 8.361527089597677  | 7.838624486503826 |
| Ag | 15.929114754854638 | 10.870244533184215 | 7.879328306894020 |
| Ag | 17.370699031942394 | 13.366733134793684 | 7.914440556820850 |
| Ag | 18.806711391131387 | 15.857708243713699 | 7.925375057250013 |
| Ag | 20.245952936056334 | 18.346818981379798 | 7.914440556820850 |
| Ag | 13.017617473870965 | 0.806685791872499  | 7.879328306894020 |
| Ag | 14.475057270496031 | 3.319780149580364  | 7.847060144752264 |
| Ag | 15.930781630943951 | 5.841168703691872  | 7.847060144752264 |
| Ag | 17.378465288513766 | 8.359895770909537  | 7.879328306894020 |
| Ag | 18.817190985092736 | 10.864110280635888 | 7.920517342334895 |
| Ag | 20.254048067959641 | 13.360098062894737 | 7.938672156223452 |
| Ag | 21.693373594885458 | 15.853083004161096 | 7.938672156223452 |
| Ag | 23.136533880423841 | 18.345431630661011 | 7.920517342334895 |
| Ag | 15.916215798486133 | 0.814537503210356  | 7.882223075553684 |
| Ag | 17.371615616148958 | 3.328377111735194  | 7.869356117629198 |
| Ag | 18.820964669339592 | 5.845710130756872  | 7.882223075553684 |
| Ag | 20.261279976309737 | 8.360100075759023  | 7.914440556820850 |
| Ag | 21.697208353497935 | 10.860471124876804 | 7.938672156223452 |
| Ag | 23.136533880423755 | 13.357884063977549 | 7.945292119584892 |
| Ag | 24.579694165962046 | 15.853083004161096 | 7.938672156223452 |
| Ag | 26.027114824791013 | 18.346818981379798 | 7.914440556820850 |
| Ag | 18.809476257051578 | 0.825892829231283  | 7.894910092417261 |
| Ag | 20.257760897819853 | 3.334395410863573  | 7.894910092417261 |
| Ag | 21.699080578783033 | 5.847725067233043  | 7.903861853859669 |
| Ag | 23.136533880423674 | 8.358235704505109  | 7.925375057250013 |
| Ag | 24.575859407349569 | 10.860471124876804 | 7.938672156223452 |
| Ag | 26.019019692887863 | 13.360098062894737 | 7.938672156223452 |

|    |                    |                    |                    |
|----|--------------------|--------------------|--------------------|
| Ag | 27.466356369715960 | 15.857708243713699 | 7.925375057250013  |
| Ag | 28.921795707244392 | 18.357834638324487 | 7.903861853859669  |
| Ag | 21.694495236075824 | 0.832561399496075  | 7.902165732973385  |
| Ag | 23.136533880423833 | 3.337278839895495  | 7.901680127808962  |
| Ag | 24.573987182064485 | 5.847725067233043  | 7.903861853859669  |
| Ag | 26.011787784537610 | 8.360100075759023  | 7.914440556820850  |
| Ag | 27.455876775754941 | 10.864110280635888 | 7.920517342334895  |
| Ag | 28.902368728904953 | 13.366733134793684 | 7.914440556820850  |
| Ag | 30.359249008885122 | 15.868092486375120 | 7.903861853859669  |
| Ag | 31.814632565773991 | 18.368186676018642 | 7.901680127808962  |
| Ag | 23.136533880424004 | 1.670479371583920  | 10.221710042322357 |
| Ag | 24.589019734800484 | 4.174270091283263  | 10.215122863246435 |
| Ag | 26.042089296493156 | 6.677319282115207  | 10.219418084425838 |
| Ag | 27.489361571810242 | 9.178992965460090  | 10.240752157978088 |
| Ag | 28.931973577081944 | 11.677670254199496 | 10.240752157978088 |
| Ag | 30.374850401179053 | 14.181881652489437 | 10.219418084425838 |
| Ag | 31.816019806515261 | 16.691801401797171 | 10.215122863246435 |
| Ag | 33.258123248346465 | 19.201586410174578 | 10.221710042322357 |
| Ag | 2.899074793949026  | 1.673781612682652  | 10.215288923124263 |
| Ag | 4.350917650349831  | 4.175503137988840  | 10.189116648763655 |
| Ag | 5.795566677871026  | 6.675849104782932  | 10.168706069058544 |
| Ag | 7.239250760097971  | 9.178300688903830  | 10.165796805257006 |
| Ag | 8.684595362573887  | 11.679793571212175 | 10.168706069058544 |
| Ag | 10.127633974306940 | 14.181069311995065 | 10.189116648763655 |
| Ag | 11.568266940212002 | 16.689262870601233 | 10.215288923124263 |
| Ag | 13.014944512501543 | 19.201586410174578 | 10.221710042322357 |
| Ag | 5.791550616254892  | 1.680253645982632  | 10.189116648763653 |
| Ag | 7.235944650288471  | 4.177674591685280  | 10.138856394969601 |
| Ag | 8.679972458249384  | 6.677165776100633  | 10.098025517387766 |
| Ag | 10.125657981953506 | 9.181166554922990  | 10.098025517387766 |
| Ag | 11.568266940212004 | 11.681476912595981 | 10.138856394969601 |
| Ag | 13.008899906117064 | 14.181069311995065 | 10.189116648763655 |
| Ag | 14.457047954332564 | 16.691801401797171 | 10.215122863246435 |
| Ag | 15.909533808709137 | 19.207580698852485 | 10.215122863246435 |
| Ag | 8.679238255509137  | 1.681183419971426  | 10.168706069058544 |
| Ag | 10.122581416507879 | 4.178493764942910  | 10.098025517387766 |
| Ag | 11.568266940212002 | 6.678942031988846  | 10.064058167202409 |
| Ag | 13.010875898470495 | 9.181166554922990  | 10.098025517387766 |
| Ag | 14.451938517850110 | 11.679793571212175 | 10.168706069058544 |
| Ag | 15.898217359668784 | 14.181881652489437 | 10.219418084425838 |
| Ag | 17.351947728285900 | 16.697616436065200 | 10.238111426366309 |
| Ag | 18.803772775738022 | 19.214451257328285 | 10.219418084425838 |
| Ag | 11.568266940211918 | 1.680224718158734  | 10.165796805257006 |
| Ag | 13.013952463916121 | 4.178493764942910  | 10.098025517387766 |
| Ag | 14.456561422174616 | 6.677165776100633  | 10.098025517387766 |
| Ag | 15.897283120325865 | 9.178300688903830  | 10.165796805257006 |
| Ag | 17.341094183765897 | 11.677670254199496 | 10.240752157978088 |
| Ag | 18.793265287226710 | 14.186089714758712 | 10.281623430381352 |
| Ag | 20.247652450691085 | 16.705162175754989 | 10.281623430381352 |
| Ag | 21.693921875152220 | 19.216988972273345 | 10.240752157978088 |
| Ag | 14.457295624914860 | 1.681183419971426  | 10.168706069058544 |
| Ag | 15.900589230135537 | 4.177674591685280  | 10.138856394969601 |
| Ag | 17.340967202552971 | 6.675849104782932  | 10.168706069058544 |
| Ag | 18.783706189037598 | 9.178992965460090  | 10.240752157978088 |
| Ag | 20.235553063202570 | 11.683002008240956 | 10.298782968544261 |
| Ag | 21.689520051462303 | 14.193317887649647 | 10.317629639153637 |
| Ag | 23.136533880423915 | 16.707648175451013 | 10.298782968544261 |
| Ag | 24.579145885695624 | 19.216988972273345 | 10.240752157978088 |
| Ag | 17.344983264169112 | 1.680253645982632  | 10.189116648763655 |
| Ag | 18.785616230074172 | 4.175503137988840  | 10.189116648763655 |
| Ag | 20.230978464354681 | 6.677319282115207  | 10.219418084425838 |
| Ag | 21.682146716959544 | 9.182400301419225  | 10.281623430381352 |
| Ag | 23.136533880423837 | 11.687016416633490 | 10.317629639153637 |

|    |                    |                    |                    |
|----|--------------------|--------------------|--------------------|
| Ag | 24.583547709385371 | 14.193317887649647 | 10.317629639153637 |
| Ag | 26.025415310156752 | 16.705162175754989 | 10.281623430381352 |
| Ag | 27.469294985109819 | 19.214451257328285 | 10.219418084425838 |
| Ag | 20.237459086483074 | 1.673781612682652  | 10.215288923124263 |
| Ag | 21.684048026047339 | 4.174270091283263  | 10.215122863246435 |
| Ag | 23.136533880423997 | 6.678419319802666  | 10.238111426366309 |
| Ag | 24.590921043888290 | 9.182400301419225  | 10.281623430381352 |
| Ag | 26.037514697645260 | 11.683002008240956 | 10.298782968544261 |
| Ag | 27.479802473621127 | 14.186089714758712 | 10.281623430381352 |
| Ag | 28.921120032562094 | 16.697616436065200 | 10.238111426366309 |
| Ag | 30.363533952138688 | 19.207580698852485 | 10.215122863246435 |
| Ag | 0.000000000000000  | 0.000000000000000  | 12.593243365701683 |
| Ag | 1.467193078709170  | 2.504865011679841  | 12.585624761595302 |
| Ag | 2.951144938613450  | 4.986834921119407  | 12.563465679928859 |
| Ag | 4.432685649149565  | 7.464566138968402  | 12.569156052842430 |
| Ag | 5.895524597810937  | 9.954101350417485  | 12.588218827007138 |
| Ag | 7.320105860210859  | 12.465724647327811 | 12.569156052842430 |
| Ag | 8.725113683349953  | 14.987642148317722 | 12.563465679928859 |
| Ag | 10.132586746400957 | 17.513767111707633 | 12.585624761595302 |
| Ag | 2.902873272520132  | 0.018193972578922  | 12.585624761595302 |
| Ag | 4.388713294148870  | 2.533824801772938  | 12.573051912627818 |
| Ag | 5.865224183961382  | 5.015729634889018  | 12.528328430670204 |
| Ag | 7.322975475727179  | 7.480972773570366  | 12.496332436315919 |
| Ag | 8.751042211143837  | 9.954456915911038  | 12.496332436315919 |
| Ag | 10.157129749864275 | 12.449528136320483 | 12.528328430670204 |
| Ag | 11.568266940211831 | 14.969176492420367 | 12.573051912627818 |
| Ag | 13.003947134022880 | 17.513767111707633 | 12.585624761595302 |
| Ag | 5.794298195475500  | 0.062349026529411  | 12.563465679928859 |
| Ag | 7.276361374309028  | 2.571568324756900  | 12.528328430670204 |
| Ag | 8.730341784145816  | 5.040465179194023  | 12.453271756165217 |
| Ag | 10.158538314821250 | 7.492849233342517  | 12.412419101179831 |
| Ag | 11.568266940211920 | 9.955895737578350  | 12.453271756165217 |
| Ag | 12.979404130559569 | 12.449528136320483 | 12.528328430670204 |
| Ag | 14.411420197074055 | 14.987642148317722 | 12.563465679928859 |
| Ag | 15.876117145581155 | 17.549687620267882 | 12.567042940577620 |
| Ag | 8.680846729150543  | 0.106535309670037  | 12.569156052842430 |
| Ag | 10.140200204795260 | 2.601396406484987  | 12.496332436315919 |
| Ag | 11.568266940212002 | 5.051127629281504  | 12.412419101179831 |
| Ag | 12.977995565602752 | 7.492849233342517  | 12.412419101179831 |
| Ag | 14.385491669279997 | 9.954456915911038  | 12.496332436315919 |
| Ag | 15.816428020212815 | 12.465724647327811 | 12.569156052842430 |
| Ag | 17.275109102036645 | 15.025948003665494 | 12.591905464817547 |
| Ag | 18.761235744323852 | 17.599994854588676 | 12.591905464817547 |
| Ag | 11.568266940212000 | 0.128623395131563  | 12.588218827007138 |
| Ag | 12.996333675628577 | 2.601396406484987  | 12.496332436315919 |
| Ag | 14.406192096278025 | 5.040465179194023  | 12.453271756165217 |
| Ag | 15.813558404696657 | 7.480972773570366  | 12.496332436315919 |
| Ag | 17.241009282613064 | 9.954101350417485  | 12.588218827007138 |
| Ag | 18.702185321780370 | 12.486534188340347 | 12.629825319657701 |
| Ag | 20.185239166727150 | 15.061814861388301 | 12.640220129139774 |
| Ag | 21.673970728988294 | 17.633817502816235 | 12.629825319657701 |
| Ag | 14.455687151273130 | 0.106535309670037  | 12.569156052842430 |
| Ag | 15.860172506114816 | 2.571568324756900  | 12.528328430670204 |
| Ag | 17.271309696462463 | 5.015729634889018  | 12.528328430670204 |
| Ag | 18.703848231274108 | 7.464566138968402  | 12.569156052842430 |
| Ag | 20.164748473215834 | 9.953300500776070  | 12.629825319657701 |
| Ag | 21.650504769049299 | 12.499924756501887 | 12.657706051724171 |
| Ag | 23.136533880423755 | 15.073802678928871 | 12.657706051724171 |
| Ag | 24.599097031859223 | 17.633817502816235 | 12.629825319657701 |
| Ag | 17.342235684948506 | 0.062349026529411  | 12.563465679928859 |
| Ag | 18.747820586274795 | 2.533824801772938  | 12.573051912627818 |
| Ag | 20.185388941810558 | 4.986834921119407  | 12.563465679928859 |
| Ag | 21.650407238136712 | 7.447709333678765  | 12.591905464817547 |

|    |                    |                    |                    |
|----|--------------------|--------------------|--------------------|
| Ag | 23.136533880423841 | 9.950022469156192  | 12.640220129139774 |
| Ag | 24.622562991798212 | 12.499924756501887 | 12.657706051724171 |
| Ag | 26.087828594120531 | 15.061814861388301 | 12.640220129139774 |
| Ag | 27.511832016523989 | 17.599994854588676 | 12.591905464817547 |
| Ag | 20.233660607903705 | 0.018193972578922  | 12.585624761595302 |
| Ag | 21.669340801714668 | 2.504865011679841  | 12.585624761595302 |
| Ag | 23.136533880423841 | 4.974276951397025  | 12.567042940577620 |
| Ag | 24.622660522711129 | 7.447709333678765  | 12.591905464817547 |
| Ag | 26.108319287631684 | 9.953300500776070  | 12.629825319657701 |
| Ag | 27.570882439067148 | 12.486534188340347 | 12.629825319657701 |
| Ag | 28.997958658811200 | 15.025948003665494 | 12.591905464817547 |
| Ag | 30.396950615266526 | 17.549687620267882 | 12.567042940577620 |
| O  | 1.650507464077505  | 0.952920898152393  | 15.379262519760216 |
| O  | 4.953073100924468  | 0.945405393059177  | 15.339712512731245 |
| O  | 3.295281664167908  | 3.816784389873860  | 15.339712512731245 |
| O  | 8.259124727455408  | 0.934387058457217  | 15.305875544412217 |
| O  | 6.595390737747458  | 3.807850587316922  | 15.306286202603234 |
| O  | 4.938765319760765  | 6.685418251973640  | 15.305875544412217 |
| O  | 11.568266892286269 | 0.930425452257668  | 15.302430312893161 |
| O  | 9.908099102800065  | 3.801976232281156  | 15.257090320286602 |
| O  | 8.246657579582021  | 6.679677364299719  | 15.257090320286602 |
| O  | 6.589905550567515  | 9.553200234551030  | 15.302430312893161 |
| O  | 14.877409057117129 | 0.934387058457217  | 15.305875544412217 |
| O  | 13.228434681772306 | 3.801976232281156  | 15.257090320286602 |
| O  | 11.568266892286182 | 6.678941973786620  | 15.217249446333220 |
| O  | 9.906825369068059  | 9.555172324778848  | 15.257090320286602 |
| O  | 8.247907484591543  | 12.417020610929010 | 15.305875544412217 |
| O  | 18.183460683648057 | 0.945405393059177  | 15.339712512731245 |
| O  | 16.541143046825241 | 3.807850587316922  | 15.306286202603234 |
| O  | 14.889876204990514 | 6.679677364299719  | 15.257090320286602 |
| O  | 13.229708415504312 | 9.555172324778848  | 15.257090320286602 |
| O  | 11.568266892286349 | 12.421124746726020 | 15.306286202603234 |
| O  | 9.910475455529784  | 15.274636138426819 | 15.339712512731245 |
| O  | 21.486026320495032 | 0.952920898152393  | 15.379262519760216 |
| O  | 19.841252120404452 | 3.816784389873860  | 15.339712512731245 |
| O  | 18.197768464811769 | 6.685418251973640  | 15.305875544412217 |
| O  | 16.546628234004860 | 9.553200234551030  | 15.302430312893161 |
| O  | 14.888626299980828 | 12.417020610929010 | 15.305875544412217 |
| O  | 13.226058329042740 | 15.274636138426819 | 15.339712512731245 |
| O  | 11.568266892286186 | 18.130984125055083 | 15.379262519760216 |
| O  | 23.136533832498184 | 3.819003534434485  | 15.341021660338043 |
| O  | 21.492487350600829 | 6.690367688415741  | 15.302404597864978 |
| O  | 19.847049476179603 | 9.553193441541195  | 15.347238946931876 |
| O  | 18.196832972173148 | 12.411452269969066 | 15.347238946931876 |
| O  | 16.540272080568716 | 15.267856146129784 | 15.302404597864978 |
| O  | 14.875621020653695 | 18.127324241445812 | 15.341021660338043 |
| O  | 24.780580314395543 | 6.690367688415741  | 15.302404597864978 |
| O  | 23.136533832498110 | 9.557439566454665  | 15.338730091749333 |
| O  | 21.492179889141845 | 12.408515813935567 | 15.376077175207630 |
| O  | 19.845252402375188 | 15.258106225435801 | 15.338730091749333 |
| O  | 18.184318562465990 | 18.115428182780732 | 15.302404597864978 |
| O  | 26.426018188816752 | 9.553193441541195  | 15.347238946931876 |
| O  | 24.780887775854382 | 12.408515813935567 | 15.376077175207630 |
| O  | 23.136533832498195 | 15.256620389455000 | 15.376077175207630 |
| O  | 21.486317328491722 | 18.109006305815843 | 15.347238946931876 |
| O  | 28.076234692823210 | 12.411452269969066 | 15.347238946931876 |
| O  | 26.427815262621191 | 15.258106225435801 | 15.338730091749333 |
| O  | 24.786750336504635 | 18.109006305815843 | 15.347238946931876 |
| O  | 29.732795584427656 | 15.267856146129784 | 15.302404597864978 |
| O  | 28.088749102530215 | 18.115428182780732 | 15.302404597864978 |
| O  | 31.397446644342672 | 18.127324241445812 | 15.341021660338043 |
| Zn | 23.136533928349568 | 1.906512230050777  | 15.265162335859028 |
| Zn | 3.295945884104924  | 1.902915273954753  | 15.241750007314650 |

|    |                    |                    |                    |
|----|--------------------|--------------------|--------------------|
| Zn | 24.783875330275325 | 4.769601699348894  | 15.205960185164964 |
| Zn | 6.598878553722708  | 1.895404514322943  | 15.200268945387755 |
| Zn | 4.940907710270951  | 4.767094252649214  | 15.200268945387755 |
| Zn | 26.429112044799258 | 7.642250409136031  | 15.218428443888813 |
| Zn | 9.911510607890357  | 1.889331933467776  | 15.186955877683980 |
| Zn | 8.244560832969519  | 4.759999446797531  | 15.162106351760483 |
| Zn | 6.591964728067662  | 7.638954055376606  | 15.186955877683980 |
| Zn | 28.077117277186023 | 10.505436995775364 | 15.247667766517861 |
| Zn | 13.225023368384790 | 1.889331933467776  | 15.186955877683980 |
| Zn | 11.568266988137573 | 4.758154448134758  | 15.142569466266250 |
| Zn | 9.904816094841635  | 7.639335911219156  | 15.142569466266250 |
| Zn | 8.248721108314879  | 10.508540281728688 | 15.186955877683980 |
| Zn | 29.732706980797062 | 13.364244685911480 | 15.218428443888813 |
| Zn | 16.537655422552593 | 1.895404514322943  | 15.200268945387755 |
| Zn | 14.891973143305787 | 4.759999446797531  | 15.162106351760483 |
| Zn | 13.231717881433511 | 7.639335911219156  | 15.142569466266250 |
| Zn | 11.568266988137655 | 10.516827376978148 | 15.162106351760483 |
| Zn | 9.910296144685811  | 13.374327503600908 | 15.200268945387755 |
| Zn | 31.397875382359441 | 16.225385830821782 | 15.205960185164964 |
| Zn | 19.840588092170048 | 1.902915273954753  | 15.241750007314650 |
| Zn | 18.195626266004350 | 4.767094252649214  | 15.200268945387755 |
| Zn | 16.544569248207480 | 7.638954055376606  | 15.186955877683980 |
| Zn | 14.887812867960264 | 10.508540281728688 | 15.186955877683980 |
| Zn | 13.226237831589327 | 13.374327503600908 | 15.200268945387755 |
| Zn | 11.568266988137486 | 16.230995722663415 | 15.241750007314650 |
| Zn | 33.053712895116355 | 19.083570068244267 | 15.265162335859028 |
| Zn | 21.489192526423821 | 4.769601699348894  | 15.205960185164964 |
| Zn | 19.843955811899864 | 7.642250409136031  | 15.218428443888813 |
| Zn | 18.195950579513127 | 10.505436995775364 | 15.247667766517861 |
| Zn | 16.540360875901897 | 13.364244685911480 | 15.218428443888813 |
| Zn | 14.875192474339704 | 16.225385830821782 | 15.205960185164964 |
| Zn | 13.219354961582619 | 19.083570068244267 | 15.265162335859028 |
| Zn | 23.136533928349479 | 7.647073801628197  | 15.215110228463637 |
| Zn | 21.487529754042296 | 10.505599507298461 | 15.276796021643259 |
| Zn | 19.841880905885038 | 13.355946923723746 | 15.276796021643259 |
| Zn | 18.190827114557425 | 16.213289282455623 | 15.215110228463637 |
| Zn | 16.522533876265374 | 19.078664836368784 | 15.205960185164964 |
| Zn | 24.785538102656840 | 10.505599507298461 | 15.276796021643259 |
| Zn | 23.136533928349408 | 13.357884122179772 | 15.306645914400102 |
| Zn | 21.490885080192392 | 16.212105935517247 | 15.276796021643259 |
| Zn | 19.832938992351675 | 19.067157271491933 | 15.218428443888813 |
| Zn | 26.431186950813931 | 13.355946923723746 | 15.276796021643259 |
| Zn | 24.782182776506581 | 16.212105935517247 | 15.276796021643259 |
| Zn | 23.136533928349493 | 19.062778374988739 | 15.247667766517861 |
| Zn | 28.082240742141536 | 16.213289282455623 | 15.215110228463637 |
| Zn | 26.440128864347447 | 19.067157271491933 | 15.218428443888813 |
| Zn | 29.750533980433609 | 19.078664836368784 | 15.205960185164964 |

#### 49/64 Au

|    |                     |                     |                     |
|----|---------------------|---------------------|---------------------|
|    | 23.0799653379289147 | 0.0000000000000000  | 0.0000000000000000  |
|    | 11.5399826689644573 | 19.9878363011107325 | 0.0000000000000000  |
|    | 0.0000000000000000  | 0.0000000000000000  | 20.3667672948810186 |
| Au | 0.0000000000000000  | 0.0000000000000000  | 5.500000000000021   |
| Au | 1.442497833620557   | 2.498479537638842   | 5.500000000000021   |
| Au | 2.884995667241114   | 4.996959075277683   | 5.500000000000021   |
| Au | 4.327493500861672   | 7.495438612916525   | 5.500000000000021   |
| Au | 5.769991334482229   | 9.993918150555366   | 5.500000000000021   |
| Au | 7.212489168102786   | 12.492397688194208  | 5.500000000000021   |
| Au | 8.654987001723343   | 14.990877225833049  | 5.500000000000021   |
| Au | 10.097484835343900  | 17.489356763471889  | 5.500000000000021   |
| Au | 2.884995667241114   | 0.0000000000000000  | 5.500000000000021   |
| Au | 4.327493500861672   | 2.498479537638842   | 5.500000000000021   |
| Au | 5.769991334482229   | 4.996959075277683   | 5.500000000000021   |



|    |                    |                    |                   |
|----|--------------------|--------------------|-------------------|
| Au | 7.212489168102787  | 7.495438612916525  | 5.500000000000021 |
| Au | 8.654987001723343  | 9.993918150555366  | 5.500000000000021 |
| Au | 10.097484835343900 | 12.492397688194208 | 5.500000000000021 |
| Au | 11.539982668964457 | 14.990877225833049 | 5.500000000000021 |
| Au | 12.982480502585014 | 17.489356763471889 | 5.500000000000021 |
| Au | 5.769991334482229  | 0.000000000000000  | 5.500000000000021 |
| Au | 7.212489168102786  | 2.498479537638842  | 5.500000000000021 |
| Au | 8.654987001723343  | 4.996959075277683  | 5.500000000000021 |
| Au | 10.097484835343900 | 7.495438612916525  | 5.500000000000021 |
| Au | 11.539982668964457 | 9.993918150555366  | 5.500000000000021 |
| Au | 12.982480502585014 | 12.492397688194208 | 5.500000000000021 |
| Au | 14.424978336205573 | 14.990877225833049 | 5.500000000000021 |
| Au | 15.867476169826130 | 17.489356763471889 | 5.500000000000021 |
| Au | 8.654987001723343  | 0.000000000000000  | 5.500000000000021 |
| Au | 10.097484835343900 | 2.498479537638842  | 5.500000000000021 |
| Au | 11.539982668964457 | 4.996959075277683  | 5.500000000000021 |
| Au | 12.982480502585016 | 7.495438612916525  | 5.500000000000021 |
| Au | 14.424978336205573 | 9.993918150555366  | 5.500000000000021 |
| Au | 15.867476169826130 | 12.492397688194208 | 5.500000000000021 |
| Au | 17.309974003446687 | 14.990877225833049 | 5.500000000000021 |
| Au | 18.752471837067244 | 17.489356763471889 | 5.500000000000021 |
| Au | 11.539982668964457 | 0.000000000000000  | 5.500000000000021 |
| Au | 12.982480502585014 | 2.498479537638842  | 5.500000000000021 |
| Au | 14.424978336205571 | 4.996959075277683  | 5.500000000000021 |
| Au | 15.867476169826130 | 7.495438612916525  | 5.500000000000021 |
| Au | 17.309974003446687 | 9.993918150555366  | 5.500000000000021 |
| Au | 18.752471837067244 | 12.492397688194208 | 5.500000000000021 |
| Au | 20.194969670687801 | 14.990877225833049 | 5.500000000000021 |
| Au | 21.637467504308358 | 17.489356763471889 | 5.500000000000021 |
| Au | 14.424978336205571 | 0.000000000000000  | 5.500000000000021 |
| Au | 15.867476169826128 | 2.498479537638842  | 5.500000000000021 |
| Au | 17.309974003446687 | 4.996959075277683  | 5.500000000000021 |
| Au | 18.752471837067244 | 7.495438612916525  | 5.500000000000021 |
| Au | 20.194969670687801 | 9.993918150555366  | 5.500000000000021 |
| Au | 21.637467504308358 | 12.492397688194208 | 5.500000000000021 |
| Au | 23.079965337928915 | 14.990877225833049 | 5.500000000000021 |
| Au | 24.522463171549472 | 17.489356763471889 | 5.500000000000021 |
| Au | 17.309974003446687 | 0.000000000000000  | 5.500000000000021 |
| Au | 18.752471837067244 | 2.498479537638842  | 5.500000000000021 |
| Au | 20.194969670687801 | 4.996959075277683  | 5.500000000000021 |
| Au | 21.637467504308358 | 7.495438612916525  | 5.500000000000021 |
| Au | 23.079965337928915 | 9.993918150555366  | 5.500000000000021 |
| Au | 24.522463171549472 | 12.492397688194208 | 5.500000000000021 |
| Au | 25.964961005170032 | 14.990877225833049 | 5.500000000000021 |
| Au | 27.407458838790589 | 17.489356763471889 | 5.500000000000021 |
| Au | 20.194969670687801 | 0.000000000000000  | 5.500000000000021 |
| Au | 21.637467504308358 | 2.498479537638842  | 5.500000000000021 |
| Au | 23.079965337928915 | 4.996959075277683  | 5.500000000000021 |
| Au | 24.522463171549472 | 7.495438612916525  | 5.500000000000021 |
| Au | 25.964961005170029 | 9.993918150555366  | 5.500000000000021 |
| Au | 27.407458838790586 | 12.492397688194208 | 5.500000000000021 |
| Au | 28.849956672411146 | 14.990877225833049 | 5.500000000000021 |
| Au | 30.292454506031703 | 17.489356763471889 | 5.500000000000021 |
| Au | 1.442439484594453  | 0.832792824720352  | 7.999721840629664 |
| Au | 2.867738977185308  | 3.342143873989140  | 7.986814560410529 |
| Au | 4.291325293756849  | 5.857693386070422  | 7.988043064626309 |
| Au | 5.710064645436221  | 8.367823526485052  | 7.998663335522059 |
| Au | 7.148267243361337  | 10.858863497668906 | 7.998663335522059 |
| Au | 8.612734035925726  | 13.342592887779229 | 7.988043064626309 |
| Au | 10.079470659579890 | 15.833229558450736 | 7.986814560410529 |
| Au | 11.539982668964374 | 18.322250651669883 | 7.999721840629664 |
| Au | 4.328250986569786  | 0.812462868670707  | 7.986814560410529 |
| Au | 5.748376055337349  | 3.318826462952217  | 7.961620277867556 |

|    |                    |                    |                    |
|----|--------------------|--------------------|--------------------|
| Au | 7.172066518569327  | 5.838577201437060  | 7.944245855850731  |
| Au | 8.609839758480049  | 8.354330898502397  | 7.937530162606458  |
| Au | 10.069659749847887 | 10.857355897679200 | 7.944245855850731  |
| Au | 11.539982668964377 | 13.350183375206161 | 7.961620277867556  |
| Au | 13.000494678348852 | 15.833229558450736 | 7.986814560410529  |
| Au | 14.442021823871096 | 18.312343213826448 | 7.997010555278429  |
| Au | 7.218573926795498  | 0.787550027260938  | 7.988043064626309  |
| Au | 8.642389437685813  | 3.291903201994324  | 7.944245855850731  |
| Au | 10.079733334982990 | 5.819536754312072  | 7.912240688715704  |
| Au | 11.539982668964374 | 8.348762792486445  | 7.912240688715704  |
| Au | 13.010305588080856 | 10.857355897679200 | 7.944245855850731  |
| Au | 14.467231302003025 | 13.342592887779229 | 7.988043064626309  |
| Au | 15.912774503309969 | 15.813517832108088 | 8.013817325921160  |
| Au | 17.341444423779990 | 18.288046721607554 | 8.013817325921160  |
| Au | 10.101780071039254 | 0.761149276956624  | 7.998663335522059  |
| Au | 11.539982668964376 | 3.279174504105798  | 7.937530162606458  |
| Au | 13.000232002945761 | 5.819536754312072  | 7.912240688715704  |
| Au | 14.470125579448704 | 8.354330898502397  | 7.937530162606458  |
| Au | 15.931698094567405 | 10.858863497668906 | 7.998663335522059  |
| Au | 17.370274589625620 | 13.333308239323939 | 8.057076181664060  |
| Au | 18.801778772747451 | 15.795236365791348 | 8.073542523797784  |
| Au | 20.218118980998742 | 18.265919417232254 | 8.057076181664060  |
| Au | 12.978185266889486 | 0.761149276956624  | 7.998663335522059  |
| Au | 14.437575900242930 | 3.291903201994324  | 7.944245855850731  |
| Au | 15.907898819359415 | 5.838577201437060  | 7.944245855850731  |
| Au | 17.369900692492521 | 8.367823526485052  | 7.998663335522059  |
| Au | 18.812659630593732 | 10.861494101896094 | 8.077719423548318  |
| Au | 20.237781104688139 | 13.327529700640884 | 8.131126134085187  |
| Au | 21.656876599826276 | 15.785475199012248 | 8.131126134085187  |
| Au | 23.079965337928826 | 18.252684398429125 | 8.077719423548318  |
| Au | 15.861391411133251 | 0.787550027260938  | 7.988043064626309  |
| Au | 17.331589282591406 | 3.318826462952217  | 7.961620277867556  |
| Au | 18.788640044171899 | 5.857693386070422  | 7.988043064626309  |
| Au | 20.232120946555710 | 8.376444945665130  | 8.057076181664060  |
| Au | 21.660869842790692 | 10.862667702568183 | 8.131126134085187  |
| Au | 23.079965337928833 | 13.325224200740442 | 8.165231948321717  |
| Au | 24.503054076031383 | 15.785475199012248 | 8.131126134085187  |
| Au | 25.941811694858920 | 18.265919417232254 | 8.057076181664060  |
| Au | 18.751714351358956 | 0.812462868670707  | 7.986814560410529  |
| Au | 20.212226360743436 | 3.342143873989140  | 7.986814560410529  |
| Au | 21.651295417458815 | 5.874108048505688  | 8.013817325921160  |
| Au | 23.079965337928829 | 8.385199870638621  | 8.073542523797784  |
| Au | 24.499060833066963 | 10.862667702568183 | 8.131126134085187  |
| Au | 25.922149571169516 | 13.327529700640884 | 8.131126134085187  |
| Au | 27.358151903110208 | 15.795236365791348 | 8.073542523797784  |
| Au | 28.818486252077683 | 18.288046721607554 | 8.013817325921160  |
| Au | 21.637525853334292 | 0.832792824720352  | 7.999721840629664  |
| Au | 23.079965337928826 | 3.350986174568414  | 7.997010555278429  |
| Au | 24.508635258398858 | 5.874108048505688  | 8.013817325921160  |
| Au | 25.927809729301956 | 8.376444945665130  | 8.057076181664060  |
| Au | 27.347271045263923 | 10.861494101896094 | 8.077719423548318  |
| Au | 28.789656086232046 | 13.333308239323939 | 8.057076181664060  |
| Au | 30.247156172547705 | 15.813517832108088 | 8.013817325921160  |
| Au | 31.717908851986557 | 18.312343213826448 | 7.997010555278429  |
| Au | 23.079965337929004 | 1.662632366783185  | 10.370919108500004 |
| Au | 24.530209304135830 | 4.149560716518878  | 10.368789059860871 |
| Au | 25.985311149575697 | 6.636541654393826  | 10.399043577658572 |
| Au | 27.444268974058001 | 9.132349087515527  | 10.438888989358455 |
| Au | 28.893253518941915 | 11.642063938636529 | 10.438888989358455 |
| Au | 30.325207246738188 | 14.153462194249133 | 10.399043577658572 |
| Au | 31.751444994945611 | 16.657107826431158 | 10.368789059860871 |
| Au | 33.180066140105019 | 19.156520117719218 | 10.370919108500004 |
| Au | 2.889888208287273  | 1.668477734982582  | 10.363484656930092 |

|    |                    |                    |                    |
|----|--------------------|--------------------|--------------------|
| Au | 4.343830518833877  | 4.156873618485895  | 10.342870935790346 |
| Au | 5.796480132809829  | 6.645059857882814  | 10.340782310158895 |
| Au | 7.244823644596758  | 9.142423319301278  | 10.343180903010511 |
| Au | 8.683432088774726  | 11.645407324624363 | 10.340782310158895 |
| Au | 10.111939774451349 | 14.147531912823650 | 10.342870935790346 |
| Au | 11.539982668964537 | 16.650880831145709 | 10.363484656930092 |
| Au | 12.979864535752986 | 19.156520117719218 | 10.370919108500004 |
| Au | 5.771873413347067  | 1.683430769801327  | 10.342870935790346 |
| Au | 7.224768091087084  | 4.171221802221745  | 10.295870816518457 |
| Au | 8.671908311911828  | 6.658405106086156  | 10.268221790390449 |
| Au | 10.109588854361821 | 9.148540850662727  | 10.268221790390449 |
| Au | 11.539982668964537 | 11.645392696667381 | 10.295870816518457 |
| Au | 12.968025563477729 | 14.147531912823650 | 10.342870935790346 |
| Au | 14.408485680912396 | 16.657107826431158 | 10.368789059860871 |
| Au | 15.858729647119223 | 19.169004059271582 | 10.368789059860871 |
| Au | 8.653030712999644  | 1.697369118603701  | 10.340782310158895 |
| Au | 10.102302126514546 | 4.180890344361991  | 10.268221790390449 |
| Au | 11.539982668964541 | 6.662612100370292  | 10.236794234326428 |
| Au | 12.970376483567257 | 9.148540850662727  | 10.268221790390449 |
| Au | 14.396533249154356 | 11.645407324624363 | 10.340782310158895 |
| Au | 15.834723429119810 | 14.153462194249133 | 10.399043577658572 |
| Au | 17.285502699669998 | 16.670658764748598 | 10.414125838790543 |
| Au | 18.740069240766509 | 19.185668753578650 | 10.399043577658572 |
| Au | 11.539982668964539 | 1.702989662508316  | 10.343180903010511 |
| Au | 12.977663211414532 | 4.180890344361991  | 10.268221790390449 |
| Au | 14.408057026017250 | 6.658405106086156  | 10.268221790390449 |
| Au | 15.835141693332318 | 9.142423319301278  | 10.343180903010511 |
| Au | 17.266677156916085 | 11.642063938636529 | 10.438888989358455 |
| Au | 18.717438428289789 | 14.160438252993295 | 10.493713246717267 |
| Au | 20.175385296260750 | 16.685676303054922 | 10.493713246717267 |
| Au | 21.630980793045087 | 19.201259576069557 | 10.438888989358455 |
| Au | 14.426934624929439 | 1.697369118603701  | 10.340782310158895 |
| Au | 15.855197246841991 | 4.171221802221745  | 10.295870816518457 |
| Au | 17.283485205119256 | 6.645059857882814  | 10.340782310158895 |
| Au | 18.715661701799995 | 9.132349087515527  | 10.438888989358455 |
| Au | 20.160313103277481 | 11.639562197124391 | 10.531701891930469 |
| Au | 21.620610436100741 | 14.167783146154274 | 10.567624008486241 |
| Au | 23.079965337929004 | 16.696548207972832 | 10.531701891930469 |
| Au | 24.528949882812910 | 19.201259576069557 | 10.438888989358455 |
| Au | 17.308091924582012 | 1.683430769801327  | 10.342870935790346 |
| Au | 18.736134819095202 | 4.156873618485895  | 10.342870935790346 |
| Au | 20.174619526282299 | 6.636541654393826  | 10.399043577658572 |
| Au | 21.622018469958022 | 9.129558046173379  | 10.493713246717267 |
| Au | 23.079965337928993 | 11.640106309913051 | 10.567624008486241 |
| Au | 24.539320239757245 | 14.167783146154274 | 10.567624008486241 |
| Au | 25.984545379597229 | 16.685676303054922 | 10.493713246717267 |
| Au | 27.419861435091487 | 19.185668753578650 | 10.399043577658572 |
| Au | 20.190077129641804 | 1.668477734982582  | 10.363484656930092 |
| Au | 21.629721371722177 | 4.149560716518878  | 10.368789059860871 |
| Au | 23.079965337928996 | 6.634355072724413  | 10.414125838790543 |
| Au | 24.537912205899957 | 9.129558046173379  | 10.493713246717267 |
| Au | 25.999617572580519 | 11.639562197124391 | 10.531701891930469 |
| Au | 27.442492247568197 | 14.160438252993295 | 10.493713246717267 |
| Au | 28.874427976187995 | 16.670658764748598 | 10.414125838790543 |
| Au | 30.301201028738785 | 19.169004059271582 | 10.368789059860871 |
| Au | 0.000000000000000  | 0.000000000000000  | 12.863468306002520 |
| Au | 1.453970352223038  | 2.494345726132091  | 12.852578773678346 |
| Au | 2.915702061700048  | 4.976525117647948  | 12.839935335266123 |
| Au | 4.379508678149008  | 7.461106495302809  | 12.857015744798774 |
| Au | 5.835593054241024  | 9.956042979993322  | 12.871566739541315 |
| Au | 7.268229242765652  | 12.464517282087888 | 12.857015744798774 |
| Au | 8.688036525360015  | 14.974501686987853 | 12.839935335266123 |
| Au | 10.106801080424447 | 17.481488176670133 | 12.852578773678346 |

|    |                    |                    |                    |
|----|--------------------|--------------------|--------------------|
| Au | 2.887151940763052  | 0.012002398308513  | 12.852578773678346 |
| Au | 4.353736153741845  | 2.513630740343459  | 12.841847645736582 |
| Au | 5.813289973610690  | 4.997776575581736  | 12.806763416938841 |
| Au | 7.263407873465580  | 7.475807860727262  | 12.786004270463243 |
| Au | 8.697447084496041  | 9.959636634278002  | 12.786004270463243 |
| Au | 10.118426178877220 | 12.454491216607641 | 12.806763416938841 |
| Au | 11.539982668964456 | 14.960574820423812 | 12.841847645736582 |
| Au | 12.973164257504475 | 17.481488176670133 | 12.852578773678346 |
| Au | 5.767648205304489  | 0.036809496474930  | 12.839935335266123 |
| Au | 7.234846463697928  | 2.535568508921358  | 12.806763416938841 |
| Au | 8.683502943368065  | 5.013422761862459  | 12.745168276704270 |
| Au | 10.117349849030443 | 7.483969541917147  | 12.721129523208671 |
| Au | 11.539982668964457 | 9.960990777385815  | 12.745168276704270 |
| Au | 12.961539159051696 | 12.454491216607641 | 12.806763416938841 |
| Au | 14.391928812568899 | 14.974501686987853 | 12.839935335266123 |
| Au | 15.840297373426484 | 17.505048448889475 | 12.840461849516162 |
| Au | 8.651262104347818  | 0.062212523720043  | 12.857015744798774 |
| Au | 10.105943457933998 | 2.552391806105467  | 12.786004270463243 |
| Au | 11.539982668964461 | 5.019897217276444  | 12.721129523208669 |
| Au | 12.962615488898479 | 7.483969541917147  | 12.721129523208671 |
| Au | 14.382518253432876 | 9.959636634278002  | 12.786004270463243 |
| Au | 15.811736095163273 | 12.464517282087888 | 12.857015744798774 |
| Au | 17.253958987769384 | 14.998003694161909 | 12.875028964567171 |
| Au | 18.718292626616538 | 17.534303955877398 | 12.875028964567171 |
| Au | 11.539982668964457 | 0.075750341124087  | 12.871566739541315 |
| Au | 12.974021879994915 | 2.552391806105467  | 12.786004270463243 |
| Au | 14.396462394560849 | 5.013422761862459  | 12.745168276704270 |
| Au | 15.816557464463333 | 7.475807860727262  | 12.786004270463243 |
| Au | 17.244372283687888 | 9.956042979993322  | 12.871566739541315 |
| Au | 18.689289593042421 | 12.474037741039117 | 12.918013944429751 |
| Au | 20.151056964521189 | 15.016230238559187 | 12.934180864088397 |
| Au | 21.621776562944390 | 17.553254165443033 | 12.918013944429751 |
| Au | 14.428703233581105 | 0.062212523720043  | 12.857015744798774 |
| Au | 15.845118874230989 | 2.535568508921358  | 12.806763416938841 |
| Au | 17.266675364318225 | 4.997776575581736  | 12.806763416938841 |
| Au | 18.700456659779917 | 7.461106495302809  | 12.857015744798774 |
| Au | 20.147478368026938 | 9.948380695739306  | 12.918013944429751 |
| Au | 21.607823311966090 | 12.475282605765489 | 12.956310580876481 |
| Au | 23.079965337928915 | 15.025107390690485 | 12.956310580876481 |
| Au | 24.538154112913432 | 17.553254165443033 | 12.918013944429751 |
| Au | 17.312317132624425 | 0.036809496474930  | 12.839935335266123 |
| Au | 18.726229184187069 | 2.513630740343459  | 12.841847645736582 |
| Au | 20.164263276228866 | 4.976525117647948  | 12.839935335266123 |
| Au | 21.615631699081767 | 7.443364952182167  | 12.875028964567171 |
| Au | 23.079965337928918 | 9.943212125103091  | 12.934180864088397 |
| Au | 24.552107363891739 | 12.475282605765489 | 12.956310580876481 |
| Au | 26.008873711336641 | 15.016230238559187 | 12.934180864088397 |
| Au | 27.441638049241305 | 17.534303955877398 | 12.875028964567171 |
| Au | 20.192813397165867 | 0.012002398308513  | 12.852578773678346 |
| Au | 21.625994985705884 | 2.494345726132091  | 12.852578773678346 |
| Au | 23.079965337928915 | 4.965575704442514  | 12.840461849516162 |
| Au | 24.544298976776076 | 7.443364952182167  | 12.875028964567171 |
| Au | 26.012452307830880 | 9.948380695739306  | 12.918013944429751 |
| Au | 27.470641082815401 | 12.474037741039117 | 12.918013944429751 |
| Au | 28.905971688088460 | 14.998003694161909 | 12.875028964567171 |
| Au | 30.319633302431345 | 17.505048448889475 | 12.840461849516162 |
| O  | 1.649941103251527  | 0.952593909651707  | 15.722876389863702 |
| O  | 4.948325301871576  | 0.949430838804481  | 15.680300712686428 |
| O  | 3.296393902853803  | 3.810659952521319  | 15.680300712686428 |
| O  | 8.245311709014203  | 0.944842358048556  | 15.651151447961817 |
| O  | 6.593856863025382  | 3.806965004407879  | 15.642088000714134 |
| O  | 4.940913365525790  | 6.668228177416920  | 15.651151447961817 |
| O  | 11.539982621155987 | 0.940877697454130  | 15.647917461984850 |

|    |                    |                    |                    |
|----|--------------------|--------------------|--------------------|
| O  | 9.890965969578511  | 3.802417008760516  | 15.612701760978803 |
| O  | 8.238472736535110  | 6.664619247555726  | 15.612701760978803 |
| O  | 6.584815324804445  | 9.523479214738426  | 15.647917461984850 |
| O  | 14.834653533297761 | 0.944842358048556  | 15.651151447961817 |
| O  | 13.188999272733291 | 3.802417008760516  | 15.612701760978803 |
| O  | 11.539982621155900 | 6.662612042310370  | 15.593152474186123 |
| O  | 9.887489388112417  | 9.520799870614727  | 15.612701760978803 |
| O  | 8.235584277667488  | 12.374765591465636 | 15.651151447961817 |
| O  | 18.131639940440380 | 0.949430838804481  | 15.680300712686428 |
| O  | 16.486108379286581 | 3.806965004407879  | 15.642088000714134 |
| O  | 14.841492505776856 | 6.664619247555726  | 15.612701760978803 |
| O  | 13.192475854199383 | 9.520799870614727  | 15.612701760978803 |
| O  | 11.539982621155982 | 12.373906118115210 | 15.642088000714134 |
| O  | 9.888051222138206  | 15.227745335605166 | 15.680300712686428 |
| O  | 21.430024139060446 | 0.952593909651707  | 15.722876389863702 |
| O  | 19.783571339457993 | 3.810659952521319  | 15.680300712686428 |
| O  | 18.139051876786176 | 6.668228177416920  | 15.651151447961816 |
| O  | 16.495149917507366 | 9.523479214738426  | 15.647917461984850 |
| O  | 14.844380964644312 | 12.374765591465636 | 15.651151447961816 |
| O  | 13.191914020173590 | 15.227745335605166 | 15.680300712686428 |
| O  | 11.539982621155906 | 18.082648307627707 | 15.722876389863702 |
| O  | 23.079965290120438 | 3.812166959320297  | 15.686895309502434 |
| O  | 21.433218076047805 | 6.671839741045846  | 15.667959882546210 |
| O  | 19.790499629270670 | 9.525483191054512  | 15.696668468381748 |
| O  | 18.144560267787334 | 12.376333791321130 | 15.696668468381748 |
| O  | 16.494591770125162 | 15.225791422499775 | 15.667959882546210 |
| O  | 14.841416101676405 | 18.081752734360702 | 15.686895309502434 |
| O  | 24.726712504193063 | 6.671839741045846  | 15.667959882546210 |
| O  | 23.079965290120349 | 9.529007154528337  | 15.707949998916487 |
| O  | 21.436300177224343 | 12.376253647292410 | 15.747975089563964 |
| O  | 19.792344940102513 | 15.223332636756602 | 15.707949998916487 |
| O  | 18.141338984197795 | 18.078041264496072 | 15.667959882546210 |
| O  | 26.369430950970219 | 9.525483191054512  | 15.696668468381748 |
| O  | 24.723630403016518 | 12.376253647292410 | 15.747975089563964 |
| O  | 23.079965290120430 | 15.223165133456867 | 15.747975089563964 |
| O  | 21.434025928637105 | 18.073855445666069 | 15.696668468381752 |
| O  | 28.015370312453555 | 12.376333791321130 | 15.696668468381752 |
| O  | 26.367585640138181 | 15.223332636756602 | 15.707949998916487 |
| O  | 24.725904651603784 | 18.073855445666069 | 15.696668468381748 |
| O  | 29.665338810115543 | 15.225791422499775 | 15.667959882546210 |
| O  | 28.018591596042917 | 18.078041264496072 | 15.667959882546210 |
| O  | 31.318514478564474 | 18.081752734360702 | 15.686895309502434 |
| Zn | 23.079965385737463 | 1.900764008749958  | 15.578164823559105 |
| Zn | 3.294155225499795  | 1.901881436652403  | 15.552422068598633 |
| Zn | 24.728530547327598 | 4.755749779724892  | 15.528489494304122 |
| Zn | 6.588956843534191  | 1.903128220954211  | 15.491813103275927 |
| Zn | 4.942635781395398  | 4.754639946149359  | 15.491813103275927 |
| Zn | 26.376716144103575 | 7.615985479464120  | 15.537946277201284 |
| Zn | 9.889099536855911  | 1.899366651785463  | 15.484230046666550 |
| Zn | 8.237711915639023  | 4.756045222458462  | 15.462624877818286 |
| Zn | 6.589449513598029  | 7.614528139263938  | 15.484230046666550 |
| Zn | 28.019920982412593 | 10.473139565275261 | 15.560967088335500 |
| Zn | 13.190865896689948 | 1.899366651785463  | 15.484230046666550 |
| Zn | 11.539982716772935 | 4.756181289113111  | 15.454759680150634 |
| Zn | 9.888965153385513  | 7.615827593088694  | 15.454759680150634 |
| Zn | 8.240332693515048  | 10.473941684241089 | 15.484230046666550 |
| Zn | 29.672686584096969 | 13.324773741777824 | 15.537946277201284 |
| Zn | 16.491008590011834 | 1.903128220954211  | 15.491813103275927 |
| Zn | 14.842253517907009 | 4.756045222458462  | 15.462624877818286 |
| Zn | 13.191000280160356 | 7.615827593088694  | 15.454759680150634 |
| Zn | 11.539982716773016 | 10.475746030373717 | 15.462624877818286 |
| Zn | 9.893661654634137  | 13.330068308186920 | 15.491813103275927 |
| Zn | 31.325630562494396 | 16.182262188607197 | 15.528489494304122 |

|    |                    |                    |                    |
|----|--------------------|--------------------|--------------------|
| Zn | 19.785810208046062 | 1.901881436652403  | 15.552422068598633 |
| Zn | 18.137329652150626 | 4.754639946149359  | 15.491813103275927 |
| Zn | 16.490515919947828 | 7.614528139263938  | 15.484230046666550 |
| Zn | 14.839632740030812 | 10.473941684241089 | 15.484230046666550 |
| Zn | 13.186303778911723 | 13.330068308186920 | 15.491813103275927 |
| Zn | 11.539982716772929 | 16.184073601985681 | 15.552422068598633 |
| Zn | 32.973838186806631 | 19.037454383825558 | 15.578164823559105 |
| Zn | 21.431400224147353 | 4.755749779724892  | 15.528489494304122 |
| Zn | 19.783214627371368 | 7.615985479464120  | 15.537946277201284 |
| Zn | 18.14009789062319  | 10.473139565275261 | 15.560967088335500 |
| Zn | 16.487244187377811 | 13.324773741777824 | 15.537946277201284 |
| Zn | 14.834300208980551 | 16.182262188607197 | 15.528489494304122 |
| Zn | 13.186092584668131 | 19.037454383825558 | 15.578164823559106 |
| Zn | 23.079965385737388 | 7.618337673476661  | 15.559924142969692 |
| Zn | 21.431821687646075 | 10.474481804118357 | 15.612907414081977 |
| Zn | 19.787078151290181 | 13.323261174506985 | 15.612907414081977 |
| Zn | 18.137656626330390 | 16.178667551462283 | 15.559924142969692 |
| Zn | 16.482865370570593 | 19.037660808069141 | 15.528489494304122 |
| Zn | 24.728109083828862 | 10.474481804118355 | 15.612907414081977 |
| Zn | 23.079965385737470 | 13.325224258800361 | 15.641443173138564 |
| Zn | 21.435221849381659 | 16.177929797775882 | 15.612907414081977 |
| Zn | 19.783994945743913 | 19.034913555159140 | 15.537946277201284 |
| Zn | 26.372852620184588 | 13.323261174506985 | 15.612907414081977 |
| Zn | 24.724708922093278 | 16.177929797775882 | 15.612907414081977 |
| Zn | 23.079965385737374 | 19.029393645850682 | 15.560967088335500 |
| Zn | 28.022274145144383 | 16.178667551462283 | 15.559924142969692 |
| Zn | 26.375935825730863 | 19.034913555159140 | 15.537946277201284 |
| Zn | 29.677065400904191 | 19.037660808069141 | 15.528489494304122 |

#### 16/21 Au

|    |                     |                      |                     |
|----|---------------------|----------------------|---------------------|
|    | -8.6549870017000003 | -9.9939181506000008  | 0.0000000000000000  |
|    | -4.3274935009000002 | -22.4863158387000013 | 0.0000000000000000  |
|    | 0.0000000000000000  | 0.0000000000000000   | 20.3667672949000007 |
| Au | -8.654987001281560  | -14.990877225107676  | 5.500000000482850   |
| Au | -7.212489168239470  | -12.492397688464138  | 5.500000000482850   |
| Au | -5.769991334331928  | -9.993918150821264   | 5.500000000482850   |
| Au | -4.327493501289900  | -7.495438614177798   | 5.500000000482850   |
| Au | -2.884995666949631  | -4.996959074286412   | 5.500000000482850   |
| Au | -1.442497833907542  | -2.498479537642876   | 5.500000000482850   |
| Au | 0.0000000000000000  | 0.0000000000000000   | 5.500000000482850   |
| Au | -10.097484834770631 | -22.486315837258068  | 5.500000000482850   |
| Au | -8.654987001728541  | -19.987836300614529  | 5.500000000482850   |
| Au | -7.212489167820999  | -17.489356762971653  | 5.500000000482850   |
| Au | -5.769991334779002  | -14.990877226328347  | 5.500000000482850   |
| Au | -4.327493500871459  | -12.492397688685474  | 5.500000000482850   |
| Au | -2.884995667829370  | -9.993918152041935   | 5.500000000482850   |
| Au | -1.442497833489071  | -7.495438612150389   | 5.500000000482850   |
| Au | -11.539982668692458 | -29.981754451657125  | 5.500000000482850   |
| Au | -10.097484835650370 | -27.483274915013592  | 5.500000000482850   |
| Au | -8.654987001310101  | -24.984795375122204  | 5.500000000482850   |
| Au | -7.212489168268073  | -22.486315838478738  | 5.500000000482850   |
| Au | -5.769991334360530  | -19.987836300835866  | 5.500000000482850   |
| Au | -4.327493501318441  | -17.489356764192326  | 5.500000000482850   |
| Au | -2.884995667410930  | -14.990877226549612  | 5.500000000482850   |
| Au | -7.201760862368733  | -14.154288352054131  | 7.940846429336481   |
| Au | -5.771777178780248  | -11.669426091792083  | 7.948343060695199   |
| Au | -4.341219776692178  | -9.170111274456593   | 7.927015958666606   |
| Au | -2.892579424867516  | -6.657049706393459   | 7.914876340821587   |
| Au | -1.443445929567684  | -4.147735442188392   | 7.927015958666606   |
| Au | -8.655301134927496  | -11.656211182673257  | 7.939602319154209   |
| Au | -7.215241939914310  | -9.163043680900824   | 7.939602319154209   |
| Au | -8.657092855047534  | -21.664661493125251  | 7.940846429336481   |
| Au | -7.197814796340198  | -19.162387272655089  | 7.927015958666606   |

|    |                     |                     |                    |
|----|---------------------|---------------------|--------------------|
| Au | -5.757621376807785  | -16.654124890833323 | 7.944207708630727  |
| Au | -4.320797613376475  | -14.158864955599686 | 7.965976151374194  |
| Au | -2.889097543165640  | -11.671486553270123 | 7.944207708630727  |
| Au | -10.098510131882133 | -19.164358713333286 | 7.914876340821587  |
| Au | -8.646377947983172  | -16.652743722422009 | 7.914876340821587  |
| Au | -10.106107288649255 | -29.141518134420046 | 7.940846429336481  |
| Au | -8.663255083526575  | -26.640938383896565 | 7.944207708630727  |
| Au | -7.220130854569366  | -24.145494820215863 | 7.948343060695199  |
| Au | -5.766924429025467  | -21.654897274077406 | 7.939602319154209  |
| Au | -4.318065970150385  | -19.151628915992053 | 7.948343060695199  |
| Au | -11.542625458180103 | -26.644242471645931 | 7.965976151374194  |
| Au | -10.101537933643421 | -24.157360551354380 | 7.965976151374194  |
| Au | -8.655122759480998  | -13.318870874964887 | 10.300974590231053 |
| Au | -7.210607004296532  | -10.819782513215912 | 10.316325793847158 |
| Au | -5.775425597565458  | -8.331559356818811  | 10.300974590231053 |
| Au | -4.342950911042761  | -5.836445503262714  | 10.297767542485106 |
| Au | -2.888161231750333  | -3.339802459883589  | 10.313682096638045 |
| Au | -5.764903017289244  | -23.324253429122209 | 10.316325793847158 |
| Au | -4.334463982346949  | -20.822513887910393 | 10.316325793847158 |
| Au | -10.083988474307290 | -20.830719365863018 | 10.297767542485106 |
| Au | -8.649518915487082  | -18.319571194600982 | 10.255665089411602 |
| Au | -7.210528118950010  | -15.806987270774338 | 10.297767542485106 |
| Au | -5.761750963858124  | -13.308427751224990 | 10.341433556748877 |
| Au | -4.318552611115632  | -10.825237916547605 | 10.313682096638045 |
| Au | -2.885467581492967  | -8.334306667762103  | 10.255665089411602 |
| Au | -1.447494005619983  | -5.826356126937085  | 10.255665089411602 |
| Au | -11.558649007564027 | -28.317363280780505 | 10.341433556748877 |
| Au | -10.105773342957217 | -25.831670296403328 | 10.357136327536297 |
| Au | -8.644561033777853  | -23.334676946594513 | 10.341433556748877 |
| Au | -7.206919147253580  | -20.823721908116475 | 10.300974590231053 |
| Au | -5.775766658868431  | -18.315193611869173 | 10.313682096638045 |
| Au | -4.335515525269379  | -15.809501475229604 | 10.357136327536297 |
| Au | -2.868685134840705  | -13.325378054118463 | 10.357136327536297 |
| Au | -8.726917026637103  | -14.971291796567197 | 12.700343660289835 |
| Au | -7.254025270192670  | -12.483240136726300 | 12.731681715126474 |
| Au | -5.746704575128859  | -10.031525292547268 | 12.740586990172407 |
| Au | -4.308489967272886  | -7.567524557701062  | 12.700343660289835 |
| Au | -2.927800386113989  | -5.055263130631584  | 12.704978517835146 |
| Au | -1.486709953607745  | -2.499842891821908  | 12.740586990172407 |
| Au | 0.000000000000000   | 0.000000000000000   | 12.744349927308914 |
| Au | -10.025737490947471 | -22.474765308577460 | 12.753911388883903 |
| Au | -8.602060510389949  | -19.935335785631676 | 12.700343660289835 |
| Au | -7.241579602176882  | -17.423134760601371 | 12.704978517835146 |
| Au | -5.815868057954383  | -14.934517468263817 | 12.753911388883903 |
| Au | -4.289764033687263  | -12.471577258526311 | 12.747837524056353 |
| Au | -2.813100514309102  | -10.001836098066896 | 12.704978517835146 |
| Au | -1.442497833489071  | -7.495438612150389  | 12.645311975253497 |
| Au | -11.527145290157659 | -30.022304546991890 | 12.731681715126474 |
| Au | -10.123355456298183 | -27.551185201758891 | 12.753911388883903 |
| Au | -8.655820713467188  | -25.027880267254357 | 12.747837524056353 |
| Au | -7.183790444849677  | -22.454923294881830 | 12.731681715126474 |
| Au | -5.749065973863395  | -19.948865804930826 | 12.740586990172407 |
| Au | -4.364389256345548  | -17.467092302219331 | 12.747837524056353 |
| Au | -2.884995667410930  | -14.990877226549612 | 12.765144794384959 |
| O  | -9.394757946478371  | -22.479245713822145 | 15.504616446665729 |
| O  | -7.215025925045540  | -19.997015358049765 | 15.559572441164695 |
| O  | -5.031430719698299  | -17.505773655404308 | 15.512908380260043 |
| O  | -8.285109133964463  | -16.879251278773328 | 15.530444065985156 |
| O  | -11.539982656128432 | -24.984795449605443 | 15.500559434145524 |
| O  | -6.127477730859321  | -14.385833071538158 | 15.504616446665729 |
| O  | -3.989742252560943  | -11.874561828232089 | 15.512908380260043 |
| O  | -7.219169636939852  | -11.247575676994291 | 15.565681517380067 |
| O  | -1.820318752922125  | -9.370054852536654  | 15.530444065985156 |

|    |                     |                     |                    |
|----|---------------------|---------------------|--------------------|
| O  | -5.055423253048406  | -8.737892056021584  | 15.559572441164695 |
| O  | -2.877052577198740  | -6.230928077606507  | 15.530444065985156 |
| O  | -10.442725289780331 | -28.095389415104542 | 15.504616446665729 |
| O  | -9.367018287691353  | -13.739244945444980 | 15.559572441164695 |
| O  | -8.288800993591598  | -25.586214568477438 | 15.512908380260043 |
| O  | -6.131101366141816  | -23.102941487286007 | 15.565681517380067 |
| O  | -12.614689963603567 | -30.609951033935960 | 15.565681517380067 |
| Zn | -2.541456254354697  | -13.107436153097666 | 15.412253916672878 |
| Zn | -9.024380631461870  | -20.597364465268491 | 15.372812950592639 |
| Zn | -6.846313399942048  | -18.134832618971345 | 15.374206847875094 |
| Zn | -1.442497846038810  | -7.495438537445885  | 15.364788424739615 |
| Zn | -4.687873142470054  | -15.635083779463837 | 15.412253916672878 |
| Zn | -7.942423266068880  | -15.006017289443129 | 15.372812950592639 |
| Zn | -5.795712989724302  | -12.500300462531523 | 15.389831402575286 |
| Zn | -0.364970056262838  | -1.869704052768847  | 15.418319643926811 |
| Zn | -3.627082123684924  | -9.988297637846232  | 15.374206847875094 |
| Zn | -6.853290722178704  | -9.375139343613357  | 15.418319643926811 |
| Zn | -4.670663644851137  | -6.870770163323312  | 15.372812950592639 |
| Zn | -12.241526710258489 | -28.750838779375187 | 15.389831402575286 |
| Zn | -2.509085016189520  | -4.357103506120149  | 15.374206847875094 |
| Zn | -10.080644643891681 | -26.224029669076160 | 15.412253916672878 |
| Zn | -7.927721343299154  | -23.709328514828286 | 15.389831402575286 |
| Zn | -5.764219762240401  | -21.235390371052794 | 15.418319643926811 |

**52/27 Sn**

|    |                      |                      |                     |
|----|----------------------|----------------------|---------------------|
|    | -20.6510535445999999 | -11.9228913230000000 | 0.0000000000000000  |
|    | 0.0000000000000000   | -23.8457826460000000 | 0.0000000000000000  |
|    | 0.0000000000000000   | 0.0000000000000000   | 21.7307573058000010 |
| Sn | -18.356492039873871  | -15.897188430269289  | 5.499999999512627   |
| Sn | -16.061930535147745  | -11.9228913230000000 | 5.499999999512627   |
| Sn | -13.767369030421763  | -7.948594215730798   | 5.499999999512627   |
| Sn | -18.356492039873871  | -23.845782647192308  | 5.499999999512627   |
| Sn | -16.061930535147745  | -19.871485537538405  | 5.499999999512627   |
| Sn | -13.767369030421763  | -15.897188430269200  | 5.499999999512627   |
| Sn | -11.472807525695634  | -11.9228913230000085 | 5.499999999512627   |
| Sn | -9.178246018904366   | -7.948594214538488   | 5.499999999512627   |
| Sn | -6.883684514178236   | -3.974297107269201   | 5.499999999512627   |
| Sn | -18.356492039873871  | -31.794376861730715  | 5.499999999512627   |
| Sn | -16.061930535147745  | -27.820079754461425  | 5.499999999512627   |
| Sn | -13.767369030421763  | -23.845782647192394  | 5.499999999512627   |
| Sn | -11.472807525695634  | -19.871485539923107  | 5.499999999512627   |
| Sn | -9.178246018904366   | -15.897188429076891  | 5.499999999512627   |
| Sn | -6.883684514178236   | -11.922891321807603  | 5.499999999512627   |
| Sn | -4.589123009452257   | -7.948594214538574   | 5.499999999512627   |
| Sn | -2.294561504726128   | -3.974297107269287   | 5.499999999512627   |
| Sn | 0.0000000000000000   | 0.0000000000000000   | 5.499999999512627   |
| Sn | -11.472807525695634  | -27.820079754461513  | 5.499999999512627   |
| Sn | -9.178246018904366   | -23.845782645999915  | 5.499999999512627   |
| Sn | -6.883684514178236   | -19.871485538730798  | 5.499999999512627   |
| Sn | -4.589123009452257   | -15.897188431461597  | 5.499999999512627   |
| Sn | -2.294561504726128   | -11.922891321807690  | 5.499999999512627   |
| Sn | 0.0000000000000000   | -7.948594214538402   | 5.499999999512627   |
| Sn | -4.589123009452257   | -23.845782646000000  | 5.499999999512627   |
| Sn | -2.294561504726128   | -19.871485538730713  | 5.499999999512627   |
| Sn | 0.0000000000000000   | -15.897188431461597  | 5.499999999512627   |
| Sn | -16.060619223031932  | -14.568405306208559  | 6.514061932323464   |
| Sn | -13.766116137191696  | -10.603697050729075  | 6.507049968847128   |
| Sn | -11.472453848987300  | -6.624172344185033   | 6.555598729071279   |
| Sn | -16.069957913847045  | -22.520175955181724  | 6.578565276532538   |
| Sn | -13.763437823702148  | -18.546175079315805  | 6.499034260396886   |
| Sn | -11.474474148490806  | -14.570521182326800  | 6.531132954924270   |
| Sn | -9.174568489563486   | -10.597465309381203  | 6.569465048019931   |
| Sn | -6.881204416054476   | -6.623335947195899   | 6.531132954924270   |



|    |                     |                     |                    |
|----|---------------------|---------------------|--------------------|
| Sn | -4.586299476314253  | -2.652675745269597  | 6.514061932323464  |
| Sn | -16.066643170301482 | -30.465751374378691 | 6.530465462711293  |
| Sn | -13.764083659419343 | -26.502686460711622 | 6.578565276532538  |
| Sn | -11.468065517998898 | -22.514485525683831 | 6.578565276532538  |
| Sn | -9.178125090984160  | -18.546241627854894 | 6.555598729071279  |
| Sn | -6.886095124086058  | -14.569568047823175 | 6.569465048019931  |
| Sn | -4.590389928885310  | -10.601640608218686 | 6.569465048019931  |
| Sn | -2.300012951388287  | -6.622127834404724  | 6.507049968847128  |
| Sn | -20.649846585696935 | -14.572726133960087 | 6.533350338119506  |
| Sn | -18.356832761923105 | -34.442711306448579 | 6.533350338119506  |
| Sn | -9.179739849902868  | -26.498990953632614 | 6.499034260396886  |
| Sn | -6.884670868402972  | -22.527028097803182 | 6.530465462711293  |
| Sn | -4.584924456020011  | -18.542849083866191 | 6.507049968847128  |
| Sn | -2.295374980054713  | -14.574816839477293 | 6.531132954924270  |
| Sn | -0.000474604628541  | -10.598259996960074 | 6.555598729071279  |
| Sn | -18.350793050495405 | -18.544568465817878 | 6.530465462711293  |
| Sn | -2.295427741579959  | -22.521910497591335 | 6.533350338119506  |
| Sn | -0.004134845253823  | -18.547592917521857 | 6.514061932323464  |
| Sn | -18.358929415594986 | -26.492181905051591 | 6.499034260396886  |
| Sn | -16.064811530055195 | -14.501847529205847 | 9.389725110226788  |
| Sn | -13.727066084485420 | -10.592183948391920 | 9.394621044736715  |
| Sn | -11.551031291965957 | -30.429608581359396 | 9.449209750229008  |
| Sn | -16.089177722343628 | -22.480337925311012 | 9.484470083171830  |
| Sn | -13.761459742356383 | -18.572897174207032 | 9.372591469634967  |
| Sn | -11.397028647388378 | -14.578312572843338 | 9.410981302945441  |
| Sn | -9.194186029991316  | -10.603802781670581 | 9.456794681315859  |
| Sn | -6.926674708723831  | -6.686510023300852  | 9.410981302945441  |
| Sn | -4.526562597098737  | -2.682323989388513  | 9.389725110226788  |
| Sn | -15.951402755843276 | -30.441694517222054 | 9.426127669351031  |
| Sn | -13.788974501075586 | -26.539250318060684 | 9.484470083171830  |
| Sn | -11.423954867845778 | -22.517759698204969 | 9.484470083171830  |
| Sn | -9.173777384489236  | -18.634464894051433 | 9.449209750229008  |
| Sn | -6.870797941873905  | -14.583388600048810 | 9.456794681315859  |
| Sn | -4.586069570669787  | -10.581482583703940 | 9.456794681315859  |
| Sn | -2.309567338641060  | -6.661702723236164  | 9.394621044736715  |
| Sn | -20.592186859335033 | -14.521631505259521 | 9.411160373501971  |
| Sn | -18.429911871555479 | -34.418323832994133 | 9.411160373501971  |
| Sn | -9.203870903593941  | -26.487342974882999 | 9.372591469634967  |
| Sn | -6.963124925064969  | -22.439255399918242 | 9.426127669351031  |
| Sn | -4.614420121473667  | -18.514787297372170 | 9.394621044736715  |
| Sn | -2.327350188487648  | -14.503851372855561 | 9.410981302945441  |
| Sn | -20.577298412744668 | -22.473274462588932 | 9.449209750229008  |
| Sn | -18.387579408291600 | -18.656398020859438 | 9.426127669351031  |
| Sn | -2.280008358309195  | -22.597392599745845 | 9.411160373501971  |
| Sn | -0.059679417446217  | -18.584502450405896 | 9.389725110226788  |
| Sn | -18.336776443249523 | -26.477107788909706 | 9.372591469634967  |
| Sn | -18.328622211854420 | -13.191949670069961 | 10.500272349153038 |
| Sn | -16.073280487701048 | -9.287219027910995  | 10.301554631149742 |
| Sn | -13.762759144235044 | -29.129522575378218 | 10.698096728105108 |
| Sn | -18.345526978323491 | -21.207904959260944 | 10.698096728105108 |
| Sn | -16.089456779048515 | -17.209563378642802 | 10.207523686398407 |
| Sn | -13.715504519200636 | -13.250708886985912 | 10.356620290627536 |
| Sn | -11.479235367832528 | -9.230543116417154  | 10.457512982040956 |
| Sn | -9.204277149839132  | -5.294020490173788  | 10.363219629853646 |
| Sn | -6.859190684448997  | -25.152905298958927 | 10.207523686398407 |
| Sn | -18.353459625702339 | -29.174879260398008 | 10.207523686398407 |
| Sn | -16.072197150077869 | -25.148629838902458 | 10.455815424049888 |
| Sn | -13.743253735866130 | -21.198319348362524 | 10.455815424049888 |
| Sn | -11.464158737025290 | -17.247018913130255 | 10.363219629853646 |
| Sn | -9.140985409192581  | -13.245186739125490 | 10.504062548318620 |
| Sn | -6.900175489378421  | -9.306863694084857  | 10.504062548318620 |
| Sn | -4.617698254704984  | -5.342452863183114  | 10.356620290627536 |
| Sn | -2.260252433822294  | -1.376755359163383  | 10.500272349153038 |

|    |                     |                     |                    |
|----|---------------------|---------------------|--------------------|
| Sn | -0.062178898923130  | -21.199968939766389 | 10.500272349153038 |
| Sn | -11.486656205321308 | -25.190398754312231 | 10.455815424049888 |
| Sn | -9.193820966641470  | -21.199920403360846 | 10.698096728105108 |
| Sn | -6.917551031122537  | -17.248929209334946 | 10.457512982040956 |
| Sn | -4.609892643963709  | -13.216623532212470 | 10.504062548318620 |
| Sn | -2.254267145644787  | -9.289201643247644  | 10.457512982040956 |
| Sn | -0.006327368486932  | -5.282303907570900  | 10.301554631149742 |
| Sn | -4.571445692052021  | -21.199151033518106 | 10.301554631149742 |
| Sn | -2.317850770694380  | -17.175512218830971 | 10.356620290627536 |
| Sn | 0.017382342264420   | -13.227634565695963 | 10.363219629853646 |
| Sn | -18.390040644053688 | -13.225413907557552 | 13.406849055840462 |
| Sn | -16.306344148669304 | -33.049441150692694 | 13.148192841633222 |
| Sn | -13.843891499119097 | -29.052446812103582 | 13.666512938005214 |
| Sn | -18.238211231869421 | -21.176180160499960 | 13.666512938005214 |
| Sn | -15.969788576798736 | -17.183797566733048 | 13.048292898986848 |
| Sn | -13.608824108287223 | -13.224528535696239 | 13.231116469503458 |
| Sn | -11.523149927600100 | -9.313062812251971  | 13.349283061899749 |
| Sn | -9.029985582765850  | -5.322245388908470  | 13.229486518962903 |
| Sn | -6.896710937910862  | -25.269423908087120 | 13.048292898986848 |
| Sn | -18.435607574490255 | -29.084126463179580 | 13.048292898986848 |
| Sn | -15.972731248756910 | -25.202955308352372 | 13.344408609035195 |
| Sn | -13.840033923142846 | -21.257296610991474 | 13.344408609035195 |
| Sn | -11.526861041238252 | -17.081965539012270 | 13.229486518962903 |
| Sn | -9.220888897471118  | -13.327701843427292 | 13.386007986237988 |
| Sn | -6.931683921760582  | -9.196407691234057  | 13.386007986237988 |
| Sn | -4.648365610864786  | -5.447930984765113  | 13.231116469503458 |
| Sn | -2.258524097505250  | -1.306833317874865  | 13.406849055840462 |
| Sn | -0.002488803041208  | -21.236426743567833 | 13.406849055840462 |
| Sn | -11.489341919365389 | -25.077096022233089 | 13.344408609035195 |
| Sn | -9.220004358211487  | -21.308720965396464 | 13.666512938005214 |
| Sn | -6.824129598333244  | -17.245700485772279 | 13.349283061899749 |
| Sn | -4.498480723303157  | -13.244564430761717 | 13.386007986237988 |
| Sn | -2.303774018666664  | -9.209910670975765  | 13.349283061899749 |
| Sn | -20.468483543102089 | -17.045136441083116 | 13.148192841633222 |
| Sn | -4.527279397428753  | -21.442770346224446 | 13.148192841633222 |
| Sn | -2.393863825448138  | -17.096214448538905 | 13.231116469503458 |
| Sn | -0.094206920595750  | -13.364463041079002 | 13.229486518962903 |
| Sn | -18.155729175900650 | -15.891358133680253 | 14.292610659056461 |
| Sn | -15.948382956828077 | -11.858578843699568 | 14.133021574663100 |
| Sn | -13.985728682839762 | -8.006250403927911  | 14.202911361703830 |
| Sn | -18.424024112527214 | -23.997205143612710 | 14.272141895386593 |
| Sn | -15.927414144946384 | -19.679063593947788 | 14.409177392926457 |
| Sn | -13.841075552071558 | -15.834272462445462 | 14.326196509698086 |
| Sn | -11.438805701844032 | -11.908256616781637 | 14.458024969429104 |
| Sn | -9.271304628789805  | -7.904158135641143  | 14.319673229937839 |
| Sn | -6.792344426914186  | -3.941923371007902  | 14.326196509698086 |
| Sn | -18.461922656818057 | -31.623426269688174 | 14.292610659056461 |
| Sn | -16.295831021643796 | -27.799796115117203 | 14.409177392926457 |
| Sn | -13.767369030421763 | -23.845782647192394 | 14.473358295408934 |
| Sn | -11.570177217973752 | -19.737289801225032 | 14.272141895386593 |
| Sn | -9.170199487131393  | -15.999997588727055 | 14.319673229937839 |
| Sn | -6.883684514178236  | -11.922891321807603 | 14.286742875993562 |
| Sn | -4.593449894015934  | -7.985358010878058  | 14.458024969429104 |
| Sn | -2.295639053031314  | -4.104788434282338  | 14.133021574663100 |
| Sn | 0.000000000000000   | 0.000000000000000   | 14.522576831868516 |
| Sn | -11.307905760764186 | -27.802852996739212 | 14.272141895386593 |
| Sn | -9.078861922609660  | -24.058488228934728 | 14.409177392926457 |
| Sn | -6.724572964304768  | -20.031762450787216 | 14.202911361703830 |
| Sn | -4.618797948740033  | -15.875059341340304 | 14.458024969429104 |
| Sn | -2.209549426613660  | -11.864518241054867 | 14.319673229937839 |
| Sn | 0.059248102544822   | -7.730661114284366  | 14.202911361703830 |
| Sn | -4.684455256481155  | -24.022563534631335 | 14.292610659056461 |
| Sn | -2.407031534740609  | -19.805306691018096 | 14.133021574663100 |

|    |                     |                     |                    |
|----|---------------------|---------------------|--------------------|
| Sn | -0.017633565614266  | -15.992478135546653 | 14.326196509698086 |
| O  | -13.999204418126952 | -28.901178036194032 | 17.135841561329279 |
| O  | -17.151193868951907 | -29.854628525942935 | 17.287626204331680 |
| O  | -20.352567971298530 | -30.697429348016893 | 17.197977164786771 |
| O  | -3.678416443601760  | -22.810728271525228 | 17.226219565371728 |
| O  | -6.871643418266742  | -23.771838109894357 | 17.287626204331680 |
| O  | -10.078361937598647 | -24.742869873671708 | 17.372077545545253 |
| O  | -13.232618825693033 | -25.715189735060044 | 17.397972084042575 |
| O  | -16.388772784600459 | -26.592012941147999 | 17.372077545545253 |
| O  | -19.494559879032366 | -27.481462736882886 | 17.320320715814756 |
| O  | -2.825106852058286  | -19.693234098445537 | 16.382672065431667 |
| O  | -6.152918811075519  | -20.551500409700999 | 16.438804697469607 |
| O  | -9.273350484924027  | -21.518860415515007 | 17.135841561329279 |
| O  | -12.415790086088938 | -22.447971971245050 | 17.397972084042575 |
| O  | -15.653698041121290 | -23.374186412923216 | 17.397972084042575 |
| O  | -18.728042056131525 | -24.296714521026843 | 16.535630222569836 |
| O  | -2.077679591194306  | -16.506662428582842 | 17.238469694377265 |
| O  | -5.239810296458926  | -17.492924238559610 | 17.308001523161547 |
| O  | -8.487973278690770  | -18.340102661053230 | 17.153774747032134 |
| O  | -11.677550855908379 | -19.324247900226613 | 16.535630222569836 |
| O  | -14.834972232769006 | -20.202465305600583 | 17.372077545545253 |
| O  | -18.029552049852132 | -21.117309665134563 | 17.135841561329279 |
| O  | -1.263387564264741  | -13.300807853280917 | 17.272575330524212 |
| O  | -4.454116700133592  | -14.157604354284878 | 17.326108628939593 |
| O  | -7.590688445008102  | -15.141534413546982 | 17.269562875516353 |
| O  | -10.887143589911785 | -16.101253046343878 | 17.272575330524212 |
| O  | -14.052364804051907 | -17.068049882829904 | 17.320320715814756 |
| O  | -17.279269669814596 | -17.910881488159575 | 17.287626204331680 |
| O  | -20.427526228482925 | -18.898616568912612 | 16.438804697469607 |
| O  | -0.524072078279865  | -10.103640608407717 | 17.153774747032134 |
| O  | -3.742755851140511  | -10.925853270570340 | 17.269562875516353 |
| O  | -6.883684470811131  | -11.922891384999041 | 16.564998200305887 |
| O  | -10.033786557721770 | -12.909602307589829 | 17.326108628939593 |
| O  | -13.256349077437534 | -13.793128176081899 | 17.238469694377265 |
| O  | -16.408469540889222 | -14.717009775093990 | 17.197977164786771 |
| O  | -19.708228688873302 | -15.626020724855689 | 17.226219565371728 |
| O  | -2.881831602749780  | -7.714238160223010  | 17.308001523161547 |
| O  | -6.163150152512749  | -8.701467489545577  | 17.326108628939593 |
| O  | -9.317609112154353  | -9.701286463726024  | 17.269562875516353 |
| O  | -12.529411509094398 | -10.561511751445421 | 17.308001523161547 |
| O  | -15.642287466157031 | -11.552551344570425 | 16.382672065431667 |
| O  | -18.785264823161079 | -12.420980567722951 | 17.297224586256114 |
| O  | -2.183659090087792  | -4.522888707212089  | 16.382672065431667 |
| O  | -5.317024739671114  | -5.468883545563040  | 17.238469694377265 |
| O  | -8.500522256191577  | -6.366613251795313  | 17.272575330524212 |
| O  | -11.639008053397466 | -7.324930881959149  | 17.153774747032134 |
| O  | -14.721661915409515 | -32.087231141806406 | 16.438804697469607 |
| O  | -17.915461820427890 | -33.100599120462412 | 17.226219565371728 |
| O  | -1.364252180226170  | -1.366775860956572  | 17.297224586256114 |
| O  | -4.541069442780351  | -26.122908997309388 | 17.197977164786771 |
| O  | -7.755182269818690  | -26.987835497130554 | 17.320320715814756 |
| O  | -10.896514042928054 | -27.916385699166394 | 16.535630222569836 |
| O  | -0.501536406981009  | -21.980917722740845 | 17.297224586256114 |
| Zn | -15.353342133556424 | -30.219462062275291 | 16.924775060538614 |
| Zn | -18.491875872169743 | -31.219326667848041 | 17.016508046674240 |
| Zn | -0.920818014838050  | -20.174073476375529 | 16.998741925646328 |
| Zn | -5.019439184114449  | -24.250553451011470 | 17.016508046674240 |
| Zn | -8.196711136749144  | -25.147777061756440 | 17.221577483270039 |
| Zn | -11.409782691498094 | -26.041847466934069 | 17.130112194170383 |
| Zn | -14.539948057984308 | -27.067487435010783 | 17.252118872000185 |
| Zn | -17.680258337699460 | -28.019116637959854 | 17.221577483270039 |
| Zn | -0.201776036000965  | -16.930144065938151 | 17.055652626435133 |
| Zn | -4.233800333520929  | -21.119893250695021 | 16.627042259642117 |

|    |                     |                     |                    |
|----|---------------------|---------------------|--------------------|
| Zn | -7.454614204259069  | -22.032435806721903 | 16.924775060538614 |
| Zn | -10.591001339280565 | -22.904003186430227 | 17.252118872000185 |
| Zn | -13.767369073788869 | -23.845782584000961 | 17.200366682950332 |
| Zn | -16.848010241917233 | -24.789479845979486 | 17.130112194170383 |
| Zn | -20.124884682876317 | -25.736840101610611 | 16.971921971915233 |
| Zn | -3.409374787649819  | -17.787570206232658 | 16.893398431230022 |
| Zn | -6.644727286403348  | -18.681546816774890 | 17.031669805785121 |
| Zn | -9.747992422857701  | -19.708028619476160 | 16.938801534494083 |
| Zn | -13.044314292081564 | -20.706020446242853 | 17.130112194170383 |
| Zn | -16.171157826167022 | -21.565857134138714 | 17.252118872000185 |
| Zn | -19.360457449215264 | -22.433777280378408 | 16.938801534494083 |
| Zn | -2.601072940623097  | -14.667537919571020 | 17.248735160790350 |
| Zn | -5.735503325917293  | -15.593171415419254 | 17.125652541887661 |
| Zn | -8.997991863495923  | -16.466359078316394 | 17.041850940766814 |
| Zn | -12.226315119516110 | -17.394483805166182 | 16.971921971915233 |
| Zn | -15.425137751048149 | -18.370454057055422 | 17.221577483270039 |
| Zn | -18.494150887681407 | -19.285449887774771 | 16.924775060538614 |
| Zn | -1.149995792571131  | -8.336620417078581  | 17.031669805785121 |
| Zn | -1.891772357620448  | -11.482201190699769 | 17.041850940766814 |
| Zn | -4.939621367145317  | -12.360333856934385 | 17.055259431749771 |
| Zn | -8.23455255587170   | -13.387778076056490 | 17.055259431749771 |
| Zn | -11.401924098810468 | -14.259418392467158 | 17.248735160790350 |
| Zn | -14.561046952638110 | -15.205967387518790 | 17.055652626435133 |
| Zn | -17.790792169212555 | -16.067467637912195 | 17.016508046674240 |
| Zn | -0.243789311941028  | -5.029523211065910  | 16.627042259642117 |
| Zn | -4.279219324751384  | -9.093397069055264  | 17.125652541887661 |
| Zn | -7.476879758164400  | -10.020561854781072 | 17.055259431749771 |
| Zn | -10.636331028163365 | -11.082105302105461 | 17.125652541887661 |
| Zn | -13.699800396179073 | -11.999392310917569 | 16.893398431230022 |
| Zn | -17.010851240747659 | -12.961294064625724 | 16.998741925646328 |
| Zn | -20.160029040116843 | -13.768493401781861 | 17.214579509128413 |
| Zn | -3.541878492937866  | -5.981711265852916  | 16.893398431230022 |
| Zn | -6.648056641463628  | -6.841717478118754  | 17.248735160790350 |
| Zn | -9.761289457715524  | -7.820113517563732  | 17.041850940766814 |
| Zn | -12.856330601922560 | -8.750506556303186  | 17.031669805785121 |
| Zn | -16.173464033370230 | -9.619257324819296  | 16.627042259642117 |
| Zn | -19.298227525791727 | -34.420633104887472 | 17.214579509128413 |
| Zn | -2.719384425311326  | -2.633306249155404  | 16.998741925646328 |
| Zn | -5.888230690192819  | -3.632562333122783  | 17.055652626435133 |
| Zn | -8.950907421039471  | -28.406023848803109 | 16.971921971915233 |
| Zn | -12.193657351359077 | -29.395541855725583 | 16.938801534494083 |
| Zn | -1.843850657523473  | -23.348221248910818 | 17.214579509128413 |

**64/57 Pb**

|    |                      |                      |                     |
|----|----------------------|----------------------|---------------------|
|    | -15.7508035509000006 | -21.2187048969000003 | 0.0000000000000000  |
|    | 26.2513392516000010  | -3.0312435566999998  | 0.0000000000000000  |
|    | 0.0000000000000000   | 0.0000000000000000   | 21.8736514974999992 |
| Pb | -12.250624985946063  | -21.218704897809303  | 5.499999999853009   |
| Pb | -10.500535701114508  | -18.187461341109305  | 5.499999999853009   |
| Pb | -8.750446418907952   | -15.156217784106195  | 5.499999999853009   |
| Pb | -7.000357134076216   | -12.124974227406216  | 5.499999999853009   |
| Pb | -5.250267851869847   | -9.093730670403087   | 5.499999999853009   |
| Pb | -3.500178567038107   | -6.062487113703108   | 5.499999999853009   |
| Pb | -1.750089284831551   | -3.031243556700000   | 5.499999999853009   |
| Pb | 0.0000000000000000   | 0.0000000000000000   | 5.499999999853009   |
| Pb | -8.750446416792130   | -21.218704896899958  | 5.499999999853009   |
| Pb | -7.000357134585574   | -18.187461339896849  | 5.499999999853009   |
| Pb | -5.250267849753838   | -15.156217783196871  | 5.499999999853009   |
| Pb | -3.500178567547468   | -12.124974226193741  | 5.499999999853009   |
| Pb | -1.750089282715727   | -9.093730669493763   | 5.499999999853009   |
| Pb | -0.000000000509171   | -6.062487112490652   | 5.499999999853009   |
| Pb | 1.750089284322380    | -3.031243555790653   | 5.499999999853009   |
| Pb | -5.250267851838304   | -21.218704897809413  | 5.499999999853009   |

|    |                     |                     |                   |
|----|---------------------|---------------------|-------------------|
| Pb | -3.500178567006566  | -18.187461341109433 | 5.49999999853009  |
| Pb | -1.750089284800197  | -15.156217784106303 | 5.49999999853009  |
| Pb | 0.000000000031545   | -12.124974227406325 | 5.49999999853009  |
| Pb | 1.750089282238209   | -9.093730670403067  | 5.49999999853009  |
| Pb | 3.500178567069760   | -6.062487113703066  | 5.49999999853009  |
| Pb | 5.250267849276316   | -3.031243556699958  | 5.49999999853009  |
| Pb | -1.750089282684076  | -21.218704896899936 | 5.49999999853009  |
| Pb | -0.000000000477707  | -18.187461339896807 | 5.49999999853009  |
| Pb | 1.750089284354035   | -15.156217783196826 | 5.49999999853009  |
| Pb | 3.500178566560589   | -12.124974226193720 | 5.49999999853009  |
| Pb | 5.250267851392140   | -9.093730669493718  | 5.49999999853009  |
| Pb | 7.000357133598695   | -6.062487112490611  | 5.49999999853009  |
| Pb | 8.750446418430249   | -3.031243555790611  | 5.49999999853009  |
| Pb | 1.750089282269752   | -21.218704897809388 | 5.49999999853009  |
| Pb | 3.500178567101303   | -18.187461341109390 | 5.49999999853009  |
| Pb | 5.250267849307861   | -15.156217784106280 | 5.49999999853009  |
| Pb | 7.000357134139411   | -12.124974227406280 | 5.49999999853009  |
| Pb | 8.750446416345969   | -9.093730670403172  | 5.49999999853009  |
| Pb | 10.500535701177705  | -6.062487113703193  | 5.49999999853009  |
| Pb | 12.250624983384077  | -3.031243556700065  | 5.49999999853009  |
| Pb | 5.250267851423681   | -21.218704896900043 | 5.49999999853009  |
| Pb | 7.000357133630240   | -18.187461339896934 | 5.49999999853009  |
| Pb | 8.750446418461790   | -15.156217783196935 | 5.49999999853009  |
| Pb | 10.500535700668461  | -12.124974226193673 | 5.49999999853009  |
| Pb | 12.250624985500199  | -9.093730669493695  | 5.49999999853009  |
| Pb | 14.000714267706568  | -6.062487112490567  | 5.49999999853009  |
| Pb | 15.750803552538306  | -3.031243555790589  | 5.49999999853009  |
| Pb | 8.750446416377622   | -21.218704897809346 | 5.49999999853009  |
| Pb | 10.500535701209172  | -18.187461341109348 | 5.49999999853009  |
| Pb | 12.250624983415729  | -15.156217784106239 | 5.49999999853009  |
| Pb | 14.000714268247467  | -12.124974227406261 | 5.49999999853009  |
| Pb | 15.750803550453837  | -9.093730670403131  | 5.49999999853009  |
| Pb | 17.500892835285573  | -6.062487113703153  | 5.49999999853009  |
| Pb | 19.250982117492129  | -3.031243556700044  | 5.49999999853009  |
| Pb | 12.250624985531553  | -21.218704896900000 | 5.49999999853009  |
| Pb | 14.000714267738108  | -18.187461339896892 | 5.49999999853009  |
| Pb | 15.750803552569845  | -15.156217783196912 | 5.49999999853009  |
| Pb | 17.500892834776216  | -12.124974226193784 | 5.49999999853009  |
| Pb | 19.250982119607954  | -9.093730669493805  | 5.49999999853009  |
| Pb | 21.001071401814514  | -6.062487112490697  | 5.49999999853009  |
| Pb | 22.751160686646060  | -3.031243555790697  | 5.49999999853009  |
| Pb | -10.503010564994879 | -20.243643469301499 | 8.346752053071603 |
| Pb | -8.744248780225021  | -17.189624014333162 | 8.331062272508856 |
| Pb | -6.983776123979470  | -14.137729349018366 | 8.320158821440316 |
| Pb | -5.252284667140401  | -11.086311800007058 | 8.319318724282850 |
| Pb | -3.520504647908873  | -8.047580718384674  | 8.331230068630255 |
| Pb | -1.779468526390273  | -5.032252753398458  | 8.346752053071603 |
| Pb | -0.010956135447088  | -2.024479734303077  | 8.350254680501177 |
| Pb | -13.992074603823788 | -20.215953321377512 | 8.350254680501177 |
| Pb | -7.021141885813022  | -20.243760996957118 | 8.331230068630255 |
| Pb | -5.257130238047621  | -17.192161081482702 | 8.309127852291207 |
| Pb | -3.497978137746450  | -14.144017150217408 | 8.307770800409674 |
| Pb | -1.759747424376306  | -11.101059577787675 | 8.309127852291207 |
| Pb | -0.013990987117865  | -8.082394865706288  | 8.331062272508856 |
| Pb | 1.730089474699511   | -5.075332408712779  | 8.344671347547660 |
| Pb | 3.484792991815349   | -2.053847572309184  | 8.349835662215382 |
| Pb | -3.523633564239704  | -20.224160946574109 | 8.319318724282850 |
| Pb | -1.752736318372033  | -17.176034250995052 | 8.307770800409674 |
| Pb | 0.000446605918295   | -14.148601949287515 | 8.307770800409674 |
| Pb | 1.748790994599482   | -11.132956241347296 | 8.320158821440316 |
| Pb | 3.493977387055188   | -8.123246390470531  | 8.340051300197100 |
| Pb | 5.227584855847712   | -5.103992125474120  | 8.356019853269400 |
| Pb | 6.970927215460362   | -2.072996035007047  | 8.355969609702623 |

|    |                     |                     |                    |
|----|---------------------|---------------------|--------------------|
| Pb | -0.015282720819712  | -20.197967760134208 | 8.320158821440316  |
| Pb | 1.766609808023635   | -17.175432693048407 | 8.309127852291207  |
| Pb | 3.525650381180403   | -14.158180603918701 | 8.319318724282850  |
| Pb | 5.274757489794986   | -11.157667034778873 | 8.335130823606132  |
| Pb | 6.996208359220303   | -8.137181199482377  | 8.356442185284632  |
| Pb | 8.715851691362950   | -5.101624210637723  | 8.361138030723581  |
| Pb | 10.449699726866466  | -2.056450986692520  | 8.343142317643521  |
| Pb | 3.507971917142589   | -20.196634470460680 | 8.331062272508856  |
| Pb | 5.291378683521895   | -17.177311635158212 | 8.331230068630255  |
| Pb | 7.056624633355892   | -14.172017534869656 | 8.343142317643521  |
| Pb | 8.784313736239657   | -11.147555329410292 | 8.353692321908955  |
| Pb | 10.484912590879279  | -8.112016131484868  | 8.364929188076580  |
| Pb | 12.205116279716318  | -5.064904740246655  | 8.353692321908955  |
| Pb | 13.951137407630856  | -2.020484024251785  | 8.335130823606132  |
| Pb | 7.032211241185452   | -20.192757127799915 | 8.346752053071603  |
| Pb | 8.810339321214199   | -17.176450379578146 | 8.355969609702623  |
| Pb | 10.560746021971381  | -14.150987367952222 | 8.361138030723581  |
| Pb | 12.283291451009223  | -11.113739727712009 | 8.364929188076580  |
| Pb | 13.983670910411204  | -8.055436151103253  | 8.364929188076580  |
| Pb | 15.706229438059140  | -5.021547126196328  | 8.356442185284632  |
| Pb | 1.718609271834934   | -23.214198435785597 | 8.340051300197100  |
| Pb | 10.536823377904803  | -20.205105409606976 | 8.349835662215382  |
| Pb | 12.306930116764365  | -17.170731105573125 | 8.356019853269400  |
| Pb | 14.049437155020561  | -14.122463684621295 | 8.356442185284632  |
| Pb | 15.762444940544018  | -11.068731938824405 | 8.353692321908955  |
| Pb | 17.475277238965674  | -8.028580431710054  | 8.361138030723581  |
| Pb | 19.217359983888215  | -5.006468777433978  | 8.356019853269400  |
| Pb | 5.240124163184790   | -23.210583687264428 | 8.344671347547660  |
| Pb | -12.220481492284589 | -17.182737256341575 | 8.344671347547660  |
| Pb | -10.462854509090121 | -14.131208524243869 | 8.340051300197100  |
| Pb | 17.525980054873859  | -14.103040951269472 | 8.335130823606132  |
| Pb | 19.245550592077642  | -11.052723488737822 | 8.343142317643521  |
| Pb | 20.970608415625740  | -8.031745595714677  | 8.355969609702623  |
| Pb | 22.730258582580149  | -5.022239028383711  | 8.349835662215382  |
| Pb | 8.752762889070874   | -23.228220294819412 | 8.350254680501177  |
| Pb | -12.236195802235391 | -19.214811821492219 | 11.201368101939845 |
| Pb | -10.462984415787526 | -16.164844909009670 | 11.184319427349676 |
| Pb | -8.696423613495657  | -13.100515205871414 | 11.156372838878523 |
| Pb | -6.964637588286234  | -10.038444872600099 | 11.164091140807320 |
| Pb | 21.013159234019117  | -10.034824766221492 | 11.197984253856248 |
| Pb | 22.739287764440139  | -7.024572028878083  | 11.206516423652557 |
| Pb | 24.494974645350531  | -4.021036307165733  | 11.208728717961701 |
| Pb | 10.521532337436067  | -22.233995711044493 | 11.208728717961701 |
| Pb | -8.765665992407316  | -19.210565248855630 | 11.187083061174976 |
| Pb | -6.994596131987076  | -16.165397109347293 | 11.138759880841501 |
| Pb | -5.226930094200050  | -13.109848101655807 | 11.131377762484957 |
| Pb | -3.489239677340333  | -10.070720417650890 | 11.143498510494791 |
| Pb | -1.753468831253116  | -7.053376400734138  | 11.187083061174976 |
| Pb | -0.021881564554097  | -4.045686132390621  | 11.201368101939845 |
| Pb | 1.735367969513402   | -1.026159992089772  | 11.208728717961701 |
| Pb | -5.284683996128603  | -19.205114888567632 | 11.143498510494791 |
| Pb | -3.509111791847918  | -16.162734353746366 | 11.119145867184868 |
| Pb | -1.742246948342938  | -13.129601320229359 | 11.119145867184868 |
| Pb | -0.001810792275805  | -10.109751959374670 | 11.138759880841501 |
| Pb | 1.732861569136846   | -7.106315695583122  | 11.184319427349676 |
| Pb | 3.461256778632470   | -4.085931336170018  | 11.201725117082260 |
| Pb | 5.214349648773789   | -1.044861571503478  | 11.206516423652557 |
| Pb | -1.783877010627883  | -19.190435091182717 | 11.131377762484957 |
| Pb | 0.001090889991158   | -16.176317676524150 | 11.119145867184868 |
| Pb | 1.760539250427941   | -13.168370159480126 | 11.131377762484957 |
| Pb | 3.503368536483070   | -10.168367079274100 | 11.156372838878523 |
| Pb | 5.219572583176483   | -7.147679830400560  | 11.206473432471608 |
| Pb | 6.936581874852561   | -4.097591011126623  | 11.223525051715326 |

|    |                     |                     |                    |
|----|---------------------|---------------------|--------------------|
| Pb | 8.684369253713353   | -1.034606360077663  | 11.197984253856248 |
| Pb | 1.746139074062881   | -19.193504281778040 | 11.138759880841501 |
| Pb | 3.523655823268934   | -16.192818044281477 | 11.143498510494791 |
| Pb | 5.289306220669122   | -13.199172937667262 | 11.164091140807320 |
| Pb | 7.012297077410213   | -10.187636847529845 | 11.198609528962283 |
| Pb | 8.707919850900943   | -7.131782001075233  | 11.231866774668507 |
| Pb | 10.416152108774957  | -4.060115335111768  | 11.218171493865205 |
| Pb | -3.574936482582588  | -22.231035540232511 | 11.164091140807320 |
| Pb | 5.268866969260142   | -19.204711702729011 | 11.187083061174976 |
| Pb | 7.054346464567828   | -16.211760884000714 | 11.197984253856248 |
| Pb | 8.808622668789216   | -13.199238450168245 | 11.218171493865205 |
| Pb | 10.518344202702620  | -10.149143329204229 | 11.229562171156529 |
| Pb | 12.202751200535259  | -7.065825177367161  | 11.229562171156529 |
| Pb | 13.922438398422537  | -4.010252540834614  | 11.198609528962283 |
| Pb | -0.057212773187411  | -22.199771065354483 | 11.156372838878523 |
| Pb | 8.798237543286364   | -19.211758408099662 | 11.206516423652557 |
| Pb | 10.580862673211300  | -16.193896828990898 | 11.223525051715326 |
| Pb | 12.322880165036759  | -13.142777648380040 | 11.231866774668507 |
| Pb | 14.030779549062423  | -10.066223503728484 | 11.229562171156529 |
| Pb | 15.721074940562588  | -7.006632359025949  | 11.231866774668507 |
| Pb | 17.451480648781086  | -3.977686095412720  | 11.206473432471608 |
| Pb | 3.479854996450383   | -22.197492745907340 | 11.184319427349676 |
| Pb | 12.308427646616897  | -19.209446486206389 | 11.201725117082260 |
| Pb | 14.080821720342433  | -16.155826084486719 | 11.206473432471608 |
| Pb | 15.817139476467549  | -13.083302621935411 | 11.198609528962283 |
| Pb | 17.527100174735530  | -10.021838225020115 | 11.218171493865205 |
| Pb | 19.234430404236143  | -6.989704170182478  | 11.223525051715326 |
| Pb | 20.982190527050637  | -3.985814187923595  | 11.201725117082260 |
| Pb | 7.007809516589489   | -22.208155396617158 | 11.201368101939845 |
| Pb | -12.289799550523853 | -21.185654273955286 | 14.039235495680463 |
| Pb | -10.518393228129565 | -18.047165541998499 | 14.046680985402947 |
| Pb | -8.665300074163927  | -14.971577746770567 | 14.034423310822902 |
| Pb | -6.813273088104909  | -11.962667686279898 | 14.014672725576133 |
| Pb | -5.026427749332367  | -8.982135436414540  | 14.043049866704504 |
| Pb | -3.335871885266129  | -6.012296535806409  | 14.059188548325077 |
| Pb | -1.701879322674247  | -3.013842700520508  | 14.039235495680463 |
| Pb | 0.000000000000000   | 0.000000000000000   | 14.042289929234823 |
| Pb | -8.876066073167639  | -21.101506425422084 | 14.059188548325077 |
| Pb | -7.070894421029264  | -18.014115518414126 | 14.029803619942447 |
| Pb | -5.206271328892491  | -15.023367907154034 | 13.998731428059363 |
| Pb | -3.360746618106414  | -12.070495078252367 | 14.001307287909729 |
| Pb | -1.564698754450174  | -9.119316498261238  | 14.029803619942447 |
| Pb | 0.130428489072469   | -6.117169940002564  | 14.046680985402947 |
| Pb | 1.757557057134945   | -3.055925954662165  | 14.034088944549746 |
| Pb | -5.458832210682864  | -21.080651299620200 | 14.043049866704504 |
| Pb | -3.617074867821151  | -18.093949304764816 | 14.001307287909729 |
| Pb | -1.750089284800197  | -15.156217784106303 | 13.986069037643192 |
| Pb | 0.093053107143637   | -12.229501270172111 | 13.998731428059363 |
| Pb | 1.867419072754696   | -9.259789586659034  | 14.034423310822902 |
| Pb | 3.544233996256007   | -6.186696373909810  | 14.045142161810610 |
| Pb | 5.168438954740085   | -3.053188903931744  | 14.046732929079038 |
| Pb | -1.984192893485876  | -21.137838631008748 | 14.014672725576133 |
| Pb | -0.137049628451150  | -18.215784173173851 | 13.998731428059363 |
| Pb | 1.727553635727567   | -15.304208967482818 | 14.001307287909729 |
| Pb | 3.547198131391085   | -12.368147033211226 | 14.014672725576133 |
| Pb | 5.295859938934587   | -9.343587255843914  | 14.042673060284306 |
| Pb | 6.935099294601036   | -6.191879168735573  | 14.057989518869249 |
| Pb | 8.564066367878477   | -2.978180111144105  | 14.055376437838255 |
| Pb | 1.547613147009239   | -21.237286018889048 | 14.034423310822902 |
| Pb | 3.385325325279439   | -18.335221333824634 | 14.029803619942447 |
| Pb | 5.234992105614943   | -15.405866616284040 | 14.043049866704504 |
| Pb | 7.030691869986553   | -12.404601856247307 | 14.053646945949019 |
| Pb | 8.738630002810446   | -9.292493244189284  | 14.046505076836963 |

|    |                     |                     |                    |
|----|---------------------|---------------------|--------------------|
| Pb | 10.345550455537426  | -6.069887597788980  | 14.053595297953434 |
| Pb | 11.993292985284324  | -2.917700394139645  | 14.053646945949019 |
| Pb | 5.137696888857093   | -21.304317868498938 | 14.046680985402947 |
| Pb | 6.961670108233768   | -18.354850389271505 | 14.059188548325077 |
| Pb | 8.797682152662114   | -15.344159364056607 | 14.055376437838255 |
| Pb | 10.584437330707539  | -12.255495144087099 | 14.053595297953434 |
| Pb | 12.250624985500199  | -9.093730669493695  | 14.025648682946521 |
| Pb | 13.834489036254006  | -5.952872511293672  | 14.046505076836963 |
| Pb | 15.511625357685126  | -2.945799168638263  | 14.042673060284306 |
| Pb | 8.741411018798113   | -21.269156377842855 | 14.039235495680463 |
| Pb | 10.560455376675254  | -18.247354568925523 | 14.046732929079038 |
| Pb | 12.395310710670714  | -15.148036702352115 | 14.057989518869249 |
| Pb | 14.178755913235548  | -12.035826254817042 | 14.046505076836963 |
| Pb | 15.821887166055038  | -8.955809268423922  | 14.053595297953434 |
| Pb | 17.421464947028255  | -5.941276139212310  | 14.057989518869249 |
| Pb | 19.121386028174832  | -3.007292047446318  | 14.045142161810610 |
| Pb | 12.268266683574499  | -21.199896416498945 | 14.034088944549746 |
| Pb | 14.086254927869163  | -18.087203588943872 | 14.045142161810610 |
| Pb | 15.944389659880578  | -14.991805583999044 | 14.042673060284306 |
| Pb | 17.727890097028833  | -11.958889759913175 | 14.053646945949019 |
| Pb | 19.390126435959697  | -8.958852533280513  | 14.055376437838255 |
| Pb | 21.022980620884962  | -5.980648537442605  | 14.046732929079038 |
| Pb | 22.726051215790847  | -3.025369637320110  | 14.034088944549746 |
| O  | 9.386277148904457   | -19.294932491063346 | 17.269663940801632 |
| O  | 6.145585890371187   | -18.884662072030743 | 17.228584599794942 |
| O  | 2.895387277358624   | -18.514727508201450 | 17.165775293183966 |
| O  | -0.377270084552967  | -18.178056498086303 | 17.140314846622847 |
| O  | -3.670763005168727  | -17.845006569762894 | 17.139483234601737 |
| O  | -6.981382213911667  | -17.500063728807348 | 17.165775293183966 |
| O  | -10.296687950143347 | -17.115643082716510 | 17.208706452392519 |
| O  | 12.654357785077440  | -19.716883275217370 | 17.257856327780019 |
| O  | 11.317611354627216  | -16.655985333246353 | 17.286112561711136 |
| O  | 8.066877459627499   | -16.212726782438629 | 17.267836335502185 |
| O  | 4.810905320516390   | -15.819072751270673 | 17.177861774057138 |
| O  | 1.538806937150552   | -15.475175753120384 | 17.139483234601737 |
| O  | -1.750089265374081  | -15.156217857765499 | 17.129186948971387 |
| O  | -5.053487885485976  | -14.834194820567273 | 17.140314846622847 |
| O  | -8.359081059907892  | -14.485162396350004 | 17.160732503829248 |
| O  | 14.596591056639536  | -17.109498816434581 | 17.231555385408807 |
| O  | 13.271149827267637  | -14.049416547395420 | 17.302650479026394 |
| O  | 10.011496238058454  | -13.577888254893379 | 17.318223295130426 |
| O  | 6.747948071481423   | -13.150412234195672 | 17.222865388899166 |
| O  | 3.470433886904143   | -12.779078811496374 | 17.156665567047920 |
| O  | 0.180490177066913   | -12.456402250399107 | 17.140314846622847 |
| O  | -3.118311724953856  | -12.148471246169404 | 17.139483234601737 |
| O  | -6.419013639720962  | -11.823681708156640 | 17.156665567047920 |
| O  | 16.542944159903740  | -14.483445478657755 | 17.207589745978254 |
| O  | 15.251935814223376  | -11.433898183360863 | 17.318401537427896 |
| O  | 11.996654746210474  | -10.979617101129667 | 17.376957766612840 |
| O  | 8.723325144805486   | -10.522858432792717 | 17.318401537427896 |
| O  | 5.436835543149802   | -10.116130806569648 | 17.207589745978254 |
| O  | 2.13557708811831    | -9.768190801003648  | 17.160732503829248 |
| O  | -1.164272857993797  | -9.453862334165665  | 17.165775293183966 |
| O  | -4.456537381535815  | -9.142802425539204  | 17.177861774057138 |
| O  | 18.515152696914715  | -11.830848008399105 | 17.222865388899166 |
| O  | 17.253583705476501  | -8.790794381442334  | 17.318223295130426 |
| O  | 14.010835625267024  | -8.370732257294250  | 17.376957766612840 |
| O  | 10.744384636475367  | -7.930842872550676  | 17.376957766612840 |
| O  | 7.448612790961011   | -7.499688266605061  | 17.302650479026394 |
| O  | 4.135783193620703   | -7.117512907938305  | 17.231555385408807 |
| O  | 0.826298054318159   | -6.774933665897185  | 17.208706452392519 |
| O  | -2.468999434493623  | -6.454140486037057  | 17.228584599794942 |
| O  | 20.507730191794586  | -9.157464380170563  | 17.267836335502185 |



|    |                     |                     |                    |
|----|---------------------|---------------------|--------------------|
| O  | 19.266236409731430  | -6.120616970753855  | 17.286112561711136 |
| O  | 16.032112389724215  | -5.732087416974109  | 17.302650479026394 |
| O  | 12.776614047348895  | -5.324435616942919  | 17.318401537427896 |
| O  | 9.486795065993014   | -4.912509592516971  | 17.318223295130426 |
| O  | 6.168027242019108   | -4.504589929096291  | 17.286112561711136 |
| O  | 2.848838649609314   | -4.131797322867439  | 17.257856327780019 |
| O  | -0.454773255649515  | -3.782311623031319  | 17.254009763556692 |
| O  | 22.517298790510651  | -6.473727877205631  | 17.269663940801632 |
| O  | 21.248678573265813  | -3.432511632889910  | 17.257856327780019 |
| O  | 18.019500756117516  | -3.054180508723614  | 17.231555385408807 |
| O  | 14.772095304899322  | -2.681615945747188  | 17.207589745978254 |
| O  | 11.488774241131832  | -2.299931986257905  | 17.222865388899166 |
| O  | 8.177267354955671   | -1.911001070487311  | 17.267836335502185 |
| O  | 4.848299066962646   | -1.512531864827526  | 17.269663940801632 |
| O  | 1.537144872518077   | -1.130499952876273  | 17.251572720264164 |
| O  | 24.503725228531486  | -3.797200184944757  | 17.251572720264164 |
| O  | 7.452344469305249   | -21.964947545508789 | 17.254009763556692 |
| O  | 4.220122101278053   | -21.578076822560892 | 17.208706452392519 |
| O  | 0.9732555565408926  | -21.215300373820941 | 17.160732503829248 |
| O  | -2.301688040155209  | -20.865893049399670 | 17.156665567047920 |
| O  | -5.604635735102521  | -20.506778396486496 | 17.177861774057138 |
| O  | -8.926854248849592  | -20.129851010984883 | 17.228584599794942 |
| O  | -12.247839009777980 | -19.721394404756396 | 17.254009763556692 |
| O  | 10.711004906903305  | -22.353492093153562 | 17.251572720264164 |
| Zn | 7.647112622852841   | -20.070376890903013 | 17.214585320617722 |
| Zn | 4.416130142423720   | -19.679938429928239 | 17.160165772037082 |
| Zn | 1.165445351651098   | -19.316195248187608 | 17.122768512248776 |
| Zn | -2.117433803207776  | -18.968804321918000 | 17.115298028045739 |
| Zn | -5.425013196394806  | -18.612096813422685 | 17.125276668277223 |
| Zn | -8.750856087607373  | -18.234460037109510 | 17.160165772037082 |
| Zn | -12.075441963670443 | -17.824020598580717 | 17.202211832640657 |
| Zn | 10.894233537595863  | -20.458309273242993 | 17.214366006595647 |
| Zn | 9.561446606515403   | -17.397129362096216 | 17.228885368827623 |
| Zn | 6.330803119517368   | -16.982305143140039 | 17.192945183555846 |
| Zn | 3.080251738500293   | -16.610855608985567 | 17.125276668277223 |
| Zn | -0.198162624136030  | -16.275011057923830 | 17.105207165337443 |
| Zn | -3.494956102142091  | -15.940828966778529 | 17.105207165337443 |
| Zn | -6.810502857437805  | -15.601156017049869 | 17.122768512248776 |
| Zn | -10.132315071904250 | -15.219505536789180 | 17.160004676736996 |
| Zn | 12.817673663939503  | -17.818087803081006 | 17.215738811079305 |
| Zn | 11.498739967032899  | -14.758728799236518 | 17.251004963380325 |
| Zn | 8.262803777958178   | -14.313425365690279 | 17.224825843257186 |
| Zn | 5.008029454308865   | -13.913935500796915 | 17.147325243489821 |
| Zn | 1.735379805976812   | -13.568054075203861 | 17.115298028045739 |
| Zn | -1.557149182724958  | -13.252813109366867 | 17.105207165337443 |
| Zn | -4.868213911772115  | -12.931794736947364 | 17.115298028045739 |
| Zn | -8.180444944379886  | -12.585921409298637 | 17.134974431847194 |
| Zn | 14.767528186212919  | -15.213274404990617 | 17.204343483868229 |
| Zn | 13.483813037311197  | -12.155987293994507 | 17.293116780086976 |
| Zn | 10.233195730456689  | -11.682322670269858 | 17.300575393442394 |
| Zn | 6.971962202636848   | -11.246018770668917 | 17.208177869383970 |
| Zn | 3.691030410508381   | -10.872514521586545 | 17.134974431847194 |
| Zn | 0.394789598358923   | -10.551301866709863 | 17.122768512248776 |
| Zn | -2.905506451108566  | -10.245700711660975 | 17.125276668277223 |
| Zn | -6.204996634684861  | -9.924656291008892  | 17.147325243489821 |
| Zn | 16.753892579275135  | -12.589042561390078 | 17.208177869383970 |
| Zn | 15.501126076182363  | -9.546579528824109  | 17.300575393442394 |
| Zn | 12.250624964498975  | -9.093730597956407  | 17.336924269826049 |
| Zn | 8.982038837993651   | -8.630574446508261  | 17.293116780086976 |
| Zn | 5.692492957186105   | -8.213660823297410  | 17.204343483868229 |
| Zn | 2.386214716856643   | -7.865353342510692  | 17.160004676736996 |
| Zn | -0.915541963819427  | -7.554254667031474  | 17.160165772037082 |
| Zn | -4.209097408822874  | -7.244915872316248  | 17.192945183555846 |

|    |                     |                     |                    |
|----|---------------------|---------------------|--------------------|
| Zn | 18.764923826635087  | -9.937437667396541  | 17.224825843257186 |
| Zn | 17.532599817933779  | -6.912383005859370  | 17.251004963380325 |
| Zn | 14.286023019767185  | -6.494630051244547  | 17.293116780086976 |
| Zn | 11.017553086857870  | -6.052289594775257  | 17.300575393442394 |
| Zn | 7.720535108530132   | -5.610079988773488  | 17.251004963380325 |
| Zn | 4.411585643454830   | -5.222630574273023  | 17.215738811079305 |
| Zn | 1.102201954685447   | -4.880298560562266  | 17.202211832640657 |
| Zn | -2.192903578222737  | -4.560922529309945  | 17.214585320617722 |
| Zn | 20.786168410991788  | -7.270927989227113  | 17.228885368827623 |
| Zn | 19.522615586102589  | -4.240473416515196  | 17.215738811079305 |
| Zn | 16.291853750097896  | -3.854256565581200  | 17.204343483868229 |
| Zn | 13.026020111584938  | -3.446130461810228  | 17.208177869383970 |
| Zn | 9.724147288903652   | -3.030328760782405  | 17.224825843257186 |
| Zn | 6.404259875989731   | -2.613134442545894  | 17.228885368827623 |
| Zn | 3.086806841845815   | -2.236771827113421  | 17.214366006595647 |
| Zn | -0.208327968987796  | -1.890665113834870  | 17.210801936200212 |
| Zn | 22.770834514055540  | -4.586110693512683  | 17.214366006595647 |
| Zn | 5.722972099981915   | -22.764333974926245 | 17.202211832640657 |
| Zn | 2.495832446044526   | -22.383794254769356 | 17.160004676736996 |
| Zn | -0.760853375131573  | -22.010217203184045 | 17.134974431847194 |
| Zn | -4.053300728627082  | -21.630061342263417 | 17.147325243489821 |
| Zn | -7.371973619697572  | -21.241432118612938 | 17.192945183555846 |
| Zn | -10.704476953633186 | -20.837353713856267 | 17.214585320617722 |
| Zn | -14.009275514699361 | -20.453789528258785 | 17.210801936200212 |
| Zn | 8.967335574684261   | -23.124198491975591 | 17.210801936200212 |

#### Wurtzite ZnO(0001) on metals

##### 25/36 Ru

194

Lattice="16.26 0.0 0.0 8.13 14.0815730655 0.0 0.0 0.0 20.3467162508"

|    |             |             |            |
|----|-------------|-------------|------------|
| Ru | 16.26000000 | 1.56461923  | 5.50000000 |
| Ru | 17.61500000 | 3.91154807  | 5.50000000 |
| Ru | 18.97000000 | 6.25847692  | 5.50000000 |
| Ru | 20.32500000 | 8.60540576  | 5.50000000 |
| Ru | 21.68000000 | 10.95233461 | 5.50000000 |
| Ru | 23.03500000 | 13.29926345 | 5.50000000 |
| Ru | 2.71000000  | 1.56461923  | 5.50000000 |
| Ru | 4.06500000  | 3.91154807  | 5.50000000 |
| Ru | 5.42000000  | 6.25847692  | 5.50000000 |
| Ru | 6.77500000  | 8.60540576  | 5.50000000 |
| Ru | 8.13000000  | 10.95233461 | 5.50000000 |
| Ru | 9.48500000  | 13.29926345 | 5.50000000 |
| Ru | 5.42000000  | 1.56461923  | 5.50000000 |
| Ru | 6.77500000  | 3.91154807  | 5.50000000 |
| Ru | 8.13000000  | 6.25847692  | 5.50000000 |
| Ru | 9.48500000  | 8.60540576  | 5.50000000 |
| Ru | 10.84000000 | 10.95233461 | 5.50000000 |
| Ru | 12.19500000 | 13.29926345 | 5.50000000 |
| Ru | 8.13000000  | 1.56461923  | 5.50000000 |
| Ru | 9.48500000  | 3.91154807  | 5.50000000 |
| Ru | 10.84000000 | 6.25847692  | 5.50000000 |
| Ru | 12.19500000 | 8.60540576  | 5.50000000 |
| Ru | 13.55000000 | 10.95233461 | 5.50000000 |
| Ru | 14.90500000 | 13.29926345 | 5.50000000 |
| Ru | 10.84000000 | 1.56461923  | 5.50000000 |
| Ru | 12.19500000 | 3.91154807  | 5.50000000 |
| Ru | 13.55000000 | 6.25847692  | 5.50000000 |
| Ru | 14.90500000 | 8.60540576  | 5.50000000 |
| Ru | 16.26000000 | 10.95233461 | 5.50000000 |
| Ru | 17.61500000 | 13.29926345 | 5.50000000 |
| Ru | 13.55000000 | 1.56461923  | 5.50000000 |
| Ru | 14.90500000 | 3.91154807  | 5.50000000 |

|    |             |             |            |
|----|-------------|-------------|------------|
| Ru | 16.26000000 | 6.25847692  | 5.50000000 |
| Ru | 17.61500000 | 8.60540576  | 5.50000000 |
| Ru | 18.97000000 | 10.95233461 | 5.50000000 |
| Ru | 20.32500000 | 13.29926345 | 5.50000000 |
| Ru | 24.36739875 | 14.06852423 | 7.57236832 |
| Ru | 17.59450673 | 2.34390500  | 7.53609415 |
| Ru | 18.96237209 | 4.71311730  | 7.53609415 |
| Ru | 20.32500000 | 7.06688421  | 7.57236832 |
| Ru | 21.67240557 | 9.39823303  | 7.59760328 |
| Ru | 23.02209423 | 11.73596236 | 7.59760328 |
| Ru | 10.82713464 | 14.06533730 | 7.53609415 |
| Ru | 4.06500000  | 2.34692884  | 7.51061654 |
| Ru | 5.42762791  | 4.71311730  | 7.53609415 |
| Ru | 6.77575365  | 7.05735377  | 7.56833568 |
| Ru | 8.12530684  | 9.39042498  | 7.57967770 |
| Ru | 9.47102918  | 11.72570793 | 7.56833568 |
| Ru | 13.56286536 | 14.06533730 | 7.53609415 |
| Ru | 6.79549327  | 2.34390500  | 7.53609415 |
| Ru | 8.14278964  | 4.70124179  | 7.54659987 |
| Ru | 9.48677945  | 7.04375614  | 7.55836183 |
| Ru | 10.83831797 | 9.38468952  | 7.55836183 |
| Ru | 12.19500000 | 11.71987601 | 7.54659987 |
| Ru | 16.28260125 | 14.06852423 | 7.57236832 |
| Ru | 9.49972447  | 2.33929790  | 7.56833568 |
| Ru | 10.84346149 | 4.69391393  | 7.55836183 |
| Ru | 12.19500000 | 7.04078653  | 7.55972772 |
| Ru | 13.55168203 | 9.38468952  | 7.55836183 |
| Ru | 14.91897082 | 11.72570793 | 7.56833568 |
| Ru | 18.97531134 | 14.06973727 | 7.59760328 |
| Ru | 12.19500000 | 2.34150965  | 7.57967770 |
| Ru | 13.54653851 | 4.69391393  | 7.55836183 |
| Ru | 14.90322055 | 7.04375614  | 7.55836183 |
| Ru | 16.26469316 | 9.39042498  | 7.57967770 |
| Ru | 17.62790577 | 11.73596236 | 7.59760328 |
| Ru | 21.67468866 | 14.06973727 | 7.59760328 |
| Ru | 14.89027553 | 2.33929790  | 7.56833568 |
| Ru | 16.24721036 | 4.70124179  | 7.54659987 |
| Ru | 17.61424635 | 7.05735377  | 7.56833568 |
| Ru | 18.97759443 | 9.39823303  | 7.59760328 |
| Ru | 20.32500000 | 11.73464422 | 7.62936105 |
| Ru | 16.25748350 | 1.56236868  | 9.66588873 |
| Ru | 17.61470088 | 3.91172077  | 9.62469415 |
| Ru | 18.97069079 | 6.26178154  | 9.66588873 |
| Ru | 20.32500000 | 8.60007200  | 9.77136105 |
| Ru | 21.68541272 | 10.94920957 | 9.78082346 |
| Ru | 23.03961917 | 13.30193033 | 9.77136105 |
| Ru | 2.72089273  | 1.57090815  | 9.58157045 |
| Ru | 4.06500000  | 3.89897023  | 9.58157045 |
| Ru | 5.41930921  | 6.26178154  | 9.66588873 |
| Ru | 6.77296957  | 8.60618232  | 9.72871000 |
| Ru | 8.12831227  | 10.95370473 | 9.72871000 |
| Ru | 9.48179272  | 13.29820938 | 9.66588873 |
| Ru | 5.40910727  | 1.57090815  | 9.58157045 |
| Ru | 6.77529912  | 3.91172077  | 9.62469415 |
| Ru | 8.13476342  | 6.25840870  | 9.68051193 |
| Ru | 9.48824679  | 8.60353123  | 9.71192003 |
| Ru | 10.84244079 | 10.94824348 | 9.68051193 |
| Ru | 12.19500000 | 13.29891805 | 9.62469415 |
| Ru | 8.13251649  | 1.56236868  | 9.66588873 |
| Ru | 9.48732263  | 3.91570742  | 9.68051193 |
| Ru | 10.84194363 | 6.25959907  | 9.68068223 |
| Ru | 12.19500000 | 8.60316145  | 9.68068223 |
| Ru | 13.54755921 | 10.94824348 | 9.68051193 |

|    |             |             |             |
|----|-------------|-------------|-------------|
| Ru | 14.90820728 | 13.29820938 | 9.66588873  |
| Ru | 10.83965730 | 1.56247255  | 9.72871000  |
| Ru | 12.19500000 | 3.91529715  | 9.71192003  |
| Ru | 13.54805637 | 6.25959907  | 9.68068223  |
| Ru | 14.90175321 | 8.60353123  | 9.71192003  |
| Ru | 16.26168773 | 10.95370473 | 9.72871000  |
| Ru | 17.61038083 | 13.30193033 | 9.77136105  |
| Ru | 13.55034270 | 1.56247255  | 9.72871000  |
| Ru | 14.90267737 | 3.91570742  | 9.68051193  |
| Ru | 16.25523658 | 6.25840870  | 9.68051193  |
| Ru | 17.61703043 | 8.60618232  | 9.72871000  |
| Ru | 18.96458728 | 10.94920957 | 9.78082346  |
| Ru | 20.32500000 | 13.30551352 | 9.78082346  |
| Ru | 0.12892934  | 0.07443739  | 11.77684625 |
| Ru | 1.40999639  | 2.37564965  | 11.65229293 |
| Ru | 2.71262525  | 4.63186902  | 11.65229293 |
| Ru | 4.06500000  | 6.89191175  | 11.77684625 |
| Ru | 5.45529050  | 9.33575905  | 11.85387543 |
| Ru | 6.83764075  | 11.73005991 | 11.85387543 |
| Ru | 2.76237114  | 0.03326787  | 11.65229293 |
| Ru | 4.06500000  | 2.34692884  | 11.66269630 |
| Ru | 5.41737475  | 4.63186902  | 11.65229293 |
| Ru | 6.80935197  | 6.96465148  | 11.75045029 |
| Ru | 8.18606484  | 9.35534633  | 11.77870750 |
| Ru | 9.56811087  | 11.74296207 | 11.75045029 |
| Ru | 5.36762886  | 0.03326787  | 11.65229293 |
| Ru | 6.72000361  | 2.37564965  | 11.65229293 |
| Ru | 8.09383625  | 4.67297854  | 11.70048329 |
| Ru | 9.50149804  | 7.02327330  | 11.74860416 |
| Ru | 10.86341593 | 9.38218428  | 11.74860416 |
| Ru | 12.19500000 | 11.77640252 | 11.70048329 |
| Ru | 8.00107066  | 0.07443739  | 11.77684625 |
| Ru | 9.43624109  | 2.41474605  | 11.75045029 |
| Ru | 10.83308211 | 4.71690203  | 11.74860416 |
| Ru | 12.19500000 | 7.04078653  | 11.74044332 |
| Ru | 13.52658407 | 9.38218428  | 11.74860416 |
| Ru | 14.82188913 | 11.74296207 | 11.75045029 |
| Ru | 10.81264975 | 0.05654064  | 11.85387543 |
| Ru | 12.19500000 | 2.41166694  | 11.77870750 |
| Ru | 13.55691789 | 4.71690203  | 11.74860416 |
| Ru | 14.88850196 | 7.02327330  | 11.74860416 |
| Ru | 16.20393516 | 9.35534633  | 11.77870750 |
| Ru | 17.55235925 | 11.73005991 | 11.85387543 |
| Ru | 13.57735025 | 0.05654064  | 11.85387543 |
| Ru | 14.95375891 | 2.41474605  | 11.75045029 |
| Ru | 16.29616375 | 4.67297854  | 11.70048329 |
| Ru | 17.58064803 | 6.96465148  | 11.75045029 |
| Ru | 18.93470950 | 9.33575905  | 11.85387543 |
| Ru | 20.32500000 | 11.73464422 | 11.83450026 |
| O  | 0.76245617  | 0.44020427  | 14.02010728 |
| O  | 4.06500000  | 0.46659113  | 14.70449963 |
| O  | 2.43657977  | 3.28709770  | 14.70449963 |
| O  | 7.36754383  | 0.44020427  | 14.02010728 |
| O  | 5.69342022  | 3.28709770  | 14.70449963 |
| O  | 4.06500000  | 6.16037798  | 14.02010728 |
| O  | 10.64018800 | 0.43081176  | 14.10098912 |
| O  | 8.96380493  | 3.23984007  | 14.54928888 |
| O  | 7.28768627  | 6.14296275  | 14.54928888 |
| O  | 5.69318793  | 8.99926722  | 14.10098912 |
| O  | 13.74981200 | 0.43081176  | 14.10098912 |
| O  | 12.19500000 | 3.26263716  | 14.74716907 |
| O  | 10.55615865 | 6.09460104  | 14.52250785 |
| O  | 8.92302666  | 8.92986122  | 14.74716907 |

|    |             |             |             |
|----|-------------|-------------|-------------|
| O  | 7.24799993  | 11.69228061 | 14.10098912 |
| O  | 15.42619507 | 3.23984007  | 14.54928888 |
| O  | 13.83384135 | 6.09460104  | 14.52250785 |
| O  | 12.19500000 | 8.93315752  | 14.52250785 |
| O  | 10.51888134 | 11.73955678 | 14.54928888 |
| O  | 17.10231373 | 6.14296275  | 14.54928888 |
| O  | 15.46697333 | 8.92986122  | 14.74716907 |
| O  | 13.87111866 | 11.73955678 | 14.54928888 |
| O  | 18.69681207 | 8.99926722  | 14.10098912 |
| O  | 17.14200007 | 11.69228061 | 14.10098912 |
| O  | 20.32500000 | 11.73464422 | 15.11816769 |
| Zn | 17.08884311 | 2.40243493  | 14.25612293 |
| Zn | 4.06500000  | 2.34692884  | 14.44686762 |
| Zn | 18.65885188 | 5.12176989  | 14.25612293 |
| Zn | 7.30115690  | 2.40243493  | 14.25612293 |
| Zn | 5.73114812  | 5.12176989  | 14.25612293 |
| Zn | 20.32500000 | 8.04293396  | 14.16656903 |
| Zn | 10.62162701 | 2.39432324  | 14.23280739 |
| Zn | 8.92443795  | 5.15252665  | 14.32724924 |
| Zn | 7.38435826  | 8.00143720  | 14.23280739 |
| Zn | 21.77020062 | 10.90025726 | 14.23527080 |
| Zn | 13.76837300 | 2.39432324  | 14.23280739 |
| Zn | 12.19500000 | 5.13746073  | 14.33690488 |
| Zn | 10.54667150 | 7.99244943  | 14.33690488 |
| Zn | 8.95773125  | 10.72659916 | 14.23280739 |
| Zn | 23.52211487 | 13.58049935 | 14.16656903 |
| Zn | 15.46556205 | 5.15252665  | 14.32724924 |
| Zn | 13.84332850 | 7.99244943  | 14.33690488 |
| Zn | 12.19500000 | 10.81730629 | 14.32724924 |
| Zn | 10.62499123 | 13.59815479 | 14.25612293 |
| Zn | 17.00564175 | 8.00143720  | 14.23280739 |
| Zn | 15.43226875 | 10.72659916 | 14.23280739 |
| Zn | 13.76500877 | 13.59815479 | 14.25612293 |
| Zn | 18.87979938 | 10.90025726 | 14.23527080 |
| Zn | 17.12788513 | 13.58049935 | 14.16656903 |
| Zn | 20.32500000 | 13.40341815 | 14.23527080 |

## 28/39 Pd

212

Lattice="-12.3779042047 -11.9106438743 0.0 4.1259680682 -16.674901424 0.0 0.0 0.0 20.6643938922"

|    |              |              |            |
|----|--------------|--------------|------------|
| Pd | -11.00258152 | -14.29277265 | 5.50000000 |
| Pd | -9.62725883  | -11.91064387 | 5.50000000 |
| Pd | -8.25193614  | -9.52851510  | 5.50000000 |
| Pd | -6.87661345  | -7.14638632  | 5.50000000 |
| Pd | -9.62725883  | -16.67490142 | 5.50000000 |
| Pd | -8.25193614  | -14.29277265 | 5.50000000 |
| Pd | -6.87661345  | -11.91064387 | 5.50000000 |
| Pd | -5.50129076  | -9.52851510  | 5.50000000 |
| Pd | -4.12596807  | -7.14638632  | 5.50000000 |
| Pd | -2.75064538  | -4.76425755  | 5.50000000 |
| Pd | -1.37532269  | -2.38212878  | 5.50000000 |
| Pd | 0.00000000   | 0.00000000   | 5.50000000 |
| Pd | -9.62725883  | -21.43915897 | 5.50000000 |
| Pd | -8.25193614  | -19.05703020 | 5.50000000 |
| Pd | -6.87661345  | -16.67490142 | 5.50000000 |
| Pd | -5.50129076  | -14.29277265 | 5.50000000 |
| Pd | -4.12596807  | -11.91064387 | 5.50000000 |
| Pd | -2.75064538  | -9.52851510  | 5.50000000 |
| Pd | -1.37532269  | -7.14638633  | 5.50000000 |
| Pd | 0.00000000   | -4.76425755  | 5.50000000 |
| Pd | -8.25193614  | -23.82128775 | 5.50000000 |
| Pd | -6.87661345  | -21.43915897 | 5.50000000 |
| Pd | -5.50129076  | -19.05703020 | 5.50000000 |

|    |              |              |             |
|----|--------------|--------------|-------------|
| Pd | -4.12596807  | -16.67490142 | 5.50000000  |
| Pd | -2.75064538  | -14.29277265 | 5.50000000  |
| Pd | -1.37532269  | -11.91064387 | 5.50000000  |
| Pd | 0.00000000   | -9.52851510  | 5.50000000  |
| Pd | 1.37532269   | -7.14638632  | 5.50000000  |
| Pd | -6.87661345  | -26.20341652 | 5.50000000  |
| Pd | -5.50129076  | -23.82128775 | 5.50000000  |
| Pd | -4.12596807  | -21.43915897 | 5.50000000  |
| Pd | -2.75064538  | -19.05703020 | 5.50000000  |
| Pd | -1.37532269  | -16.67490142 | 5.50000000  |
| Pd | -0.00000000  | -14.29277265 | 5.50000000  |
| Pd | 1.37532269   | -11.91064387 | 5.50000000  |
| Pd | -1.37532269  | -21.43915897 | 5.50000000  |
| Pd | -0.00000000  | -19.05703020 | 5.50000000  |
| Pd | 1.37532269   | -16.67490142 | 5.50000000  |
| Pd | 2.75064538   | -14.29277265 | 5.50000000  |
| Pd | -9.63103493  | -13.49908600 | 7.78479613  |
| Pd | -8.24676482  | -11.11782883 | 7.78658915  |
| Pd | -6.87555764  | -8.73194359  | 7.79181862  |
| Pd | -5.49170790  | -6.35114583  | 7.78147817  |
| Pd | -8.25873239  | -15.88424628 | 7.77842926  |
| Pd | -6.87970958  | -13.49746698 | 7.78614317  |
| Pd | -5.50314607  | -11.11877613 | 7.78953874  |
| Pd | -4.12678025  | -8.73399372  | 7.78698256  |
| Pd | -2.75240226  | -6.35727970  | 7.78631829  |
| Pd | -1.38232942  | -3.96820307  | 7.79168283  |
| Pd | -0.00880568  | -1.59026010  | 7.79061613  |
| Pd | -11.00037194 | -11.11863269 | 7.78164678  |
| Pd | -8.24832348  | -20.65626358 | 7.78791359  |
| Pd | -6.87759713  | -18.27068251 | 7.77633658  |
| Pd | -5.50117828  | -15.88155917 | 7.78446009  |
| Pd | -4.13279746  | -13.49862719 | 7.79231844  |
| Pd | -2.74808381  | -11.11545283 | 7.78762602  |
| Pd | -1.37415902  | -8.73656996  | 7.79240069  |
| Pd | -0.00201426  | -6.35605409  | 7.78655788  |
| Pd | -11.00806004 | -15.88360422 | 7.78333957  |
| Pd | -6.87048332  | -23.03176085 | 7.79361547  |
| Pd | -5.49370090  | -20.64671954 | 7.78001961  |
| Pd | -4.12448901  | -18.25830777 | 7.78438079  |
| Pd | -2.75823170  | -15.87491401 | 7.78643802  |
| Pd | -1.38066955  | -13.49052380 | 7.78049438  |
| Pd | 0.00005745   | -11.11917868 | 7.78597952  |
| Pd | 1.37278997   | -8.73576191  | 7.78728811  |
| Pd | -9.63320418  | -18.27444075 | 7.77886030  |
| Pd | -5.49971005  | -25.40698361 | 7.79371239  |
| Pd | -4.12013513  | -23.03253415 | 7.78526856  |
| Pd | -2.74196159  | -20.63990843 | 7.77983090  |
| Pd | -1.38112529  | -18.25292495 | 7.78740646  |
| Pd | 0.00289712   | -15.87269062 | 7.78426602  |
| Pd | 1.37991028   | -13.50109350 | 7.78965721  |
| Pd | -9.62260966  | -23.03143763 | 7.79156720  |
| Pd | -4.12289947  | -3.96181787  | 7.79209953  |
| Pd | 1.37373137   | -18.25733334 | 7.79519066  |
| Pd | 2.75371981   | -15.88300126 | 7.79224820  |
| Pd | -8.24486019  | -25.40454516 | 7.79148832  |
| Pd | -11.01824876 | -12.70484654 | 10.02368869 |
| Pd | -9.61452671  | -10.32996719 | 10.01791047 |
| Pd | -4.13201853  | -24.60122211 | 10.05249506 |
| Pd | -2.72795454  | -22.22870939 | 10.00431649 |
| Pd | -9.62513526  | -15.08862018 | 10.02397575 |
| Pd | -8.24872539  | -12.70594720 | 10.04710954 |
| Pd | -6.87318009  | -10.31740821 | 10.03981684 |
| Pd | -5.48322358  | -7.92240399  | 10.04249593 |

|    |              |              |             |
|----|--------------|--------------|-------------|
| Pd | -4.11724317  | -5.55475792  | 10.04116184 |
| Pd | -2.73078728  | -3.15827045  | 10.05307418 |
| Pd | 2.74019501   | -17.47232500 | 10.07130528 |
| Pd | -8.24159544  | -26.99023909 | 10.02163426 |
| Pd | -9.62268098  | -19.86598479 | 10.03329984 |
| Pd | -8.27270452  | -17.48516233 | 10.00313823 |
| Pd | -6.88767679  | -15.08243289 | 10.00778039 |
| Pd | -5.52802980  | -12.69320142 | 10.04892191 |
| Pd | -4.12562609  | -10.31937551 | 10.01965138 |
| Pd | -2.75480607  | -7.93989126  | 10.04278586 |
| Pd | -1.37818280  | -5.56627489  | 10.01644179 |
| Pd | 0.00005233   | -3.18447606  | 10.03344916 |
| Pd | -8.23789893  | -22.26734309 | 10.04890498 |
| Pd | -6.87000168  | -19.85646478 | 10.02224921 |
| Pd | -5.50367729  | -17.47602035 | 10.02403932 |
| Pd | -4.13965704  | -15.09291392 | 10.04649545 |
| Pd | -2.76001142  | -12.69709944 | 10.03997446 |
| Pd | -1.37290703  | -10.33984063 | 10.04632564 |
| Pd | 0.01375371   | -7.94178929  | 10.04789022 |
| Pd | 1.37967667   | -5.58479084  | 10.03975527 |
| Pd | -6.85967915  | -24.60393234 | 10.07256456 |
| Pd | -5.49223156  | -22.23108510 | 10.02175945 |
| Pd | -4.10830564  | -19.82586108 | 10.02483146 |
| Pd | -2.78210887  | -17.45448911 | 10.05100489 |
| Pd | -1.38509832  | -15.06530907 | 10.00648091 |
| Pd | -0.01291556  | -12.70345585 | 10.03843361 |
| Pd | 1.37317372   | -10.33308224 | 10.01662015 |
| Pd | -1.37662737  | -19.83650893 | 10.03226603 |
| Pd | -0.00854080  | -17.45872280 | 10.02334088 |
| Pd | 1.37581058   | -15.10718102 | 10.04248170 |
| Pd | 2.75356905   | -12.70905084 | 10.03876272 |
| Pd | -10.98007141 | -14.30166280 | 12.29626282 |
| Pd | -9.65145907  | -11.92606071 | 12.28376601 |
| Pd | -8.24388423  | -9.50179908  | 12.31011101 |
| Pd | -6.86067086  | -7.12311403  | 12.29913721 |
| Pd | -9.63484320  | -16.67929114 | 12.31017192 |
| Pd | -8.24665673  | -14.30462657 | 12.33643858 |
| Pd | -6.91313369  | -11.87032648 | 12.39407631 |
| Pd | -5.48052999  | -9.49370359  | 12.28700238 |
| Pd | -4.09726551  | -7.11994676  | 12.39491424 |
| Pd | -2.72480346  | -4.74077053  | 12.28435475 |
| Pd | -1.30559685  | -2.38874478  | 12.39153303 |
| Pd | 4.11698044   | -16.63764280 | 12.30787374 |
| Pd | -9.60695169  | -21.48948408 | 12.25288929 |
| Pd | -8.24390207  | -19.07314102 | 12.32003270 |
| Pd | -6.91749422  | -16.69242776 | 12.20243026 |
| Pd | -5.52640115  | -14.27810605 | 12.29640111 |
| Pd | -4.16551785  | -11.89885894 | 12.28566174 |
| Pd | -2.74437832  | -9.54512113  | 12.29597443 |
| Pd | -1.37200527  | -7.15826178  | 12.30311880 |
| Pd | 0.01047865   | -4.81355599  | 12.27074166 |
| Pd | -8.26233310  | -23.88593290 | 12.39147260 |
| Pd | -6.87302357  | -21.43418023 | 12.30481798 |
| Pd | -5.50412631  | -19.07005114 | 12.32635559 |
| Pd | -4.19248924  | -16.66021102 | 12.40057985 |
| Pd | -2.77531310  | -14.28250854 | 12.31267188 |
| Pd | -1.40151413  | -11.92854074 | 12.39431977 |
| Pd | 0.00548660   | -9.54115925  | 12.30081055 |
| Pd | 1.40482593   | -7.19651336  | 12.39568022 |
| Pd | -6.83093221  | -26.21375962 | 12.27663834 |
| Pd | -5.47620087  | -23.76564248 | 12.40009929 |
| Pd | -4.08789162  | -21.40142230 | 12.20889941 |
| Pd | -2.72103223  | -19.02718120 | 12.36557962 |

|    |              |              |             |
|----|--------------|--------------|-------------|
| Pd | -1.41232774  | -16.63413792 | 12.22992770 |
| Pd | -0.00581175  | -14.30175984 | 12.29243392 |
| Pd | 1.35191985   | -11.91857076 | 12.30205275 |
| Pd | -1.36043775  | -21.42571333 | 12.31956831 |
| Pd | 0.01013007   | -19.05875920 | 12.29562641 |
| Pd | 1.33524484   | -16.70228278 | 12.38116422 |
| Pd | 2.73090253   | -14.31252824 | 12.29946413 |
| O  | -5.40832058  | -23.20353656 | 14.66924239 |
| O  | -8.35838197  | -24.45740971 | 14.70707582 |
| O  | 0.80573644   | -17.14729925 | 14.78161156 |
| O  | -2.16069412  | -18.58593354 | 14.84442879 |
| O  | -5.13541315  | -19.93677234 | 15.06345903 |
| O  | -8.08546326  | -21.23617996 | 15.18877376 |
| O  | 1.09092339   | -13.92724479 | 15.17590170 |
| O  | -1.83612264  | -15.32260748 | 15.18756355 |
| O  | -4.75445195  | -16.66124373 | 14.68016657 |
| O  | -7.74255514  | -18.01471089 | 15.12526454 |
| O  | 1.37024506   | -10.68677706 | 15.16620194 |
| O  | -1.54384702  | -12.06826328 | 14.65004448 |
| O  | -4.48334018  | -13.43783747 | 15.20807834 |
| O  | -7.45979309  | -14.79937053 | 15.00085562 |
| O  | -10.42064609 | -16.14817366 | 15.06680590 |
| O  | 1.64073325   | -7.43985837  | 14.64701271 |
| O  | -1.28669465  | -8.83312255  | 15.19826995 |
| O  | -4.21252247  | -10.22060442 | 15.19567963 |
| O  | -7.14401610  | -11.59877064 | 14.64892701 |
| O  | -10.12214149 | -12.92873685 | 15.13809852 |
| O  | -1.00173489  | -5.60366995  | 15.18189082 |
| O  | -3.95381836  | -6.99763937  | 14.64957515 |
| O  | -6.87359547  | -8.37561718  | 15.19652667 |
| O  | -9.83225658  | -9.71796050  | 15.16836024 |
| O  | -0.73863188  | -2.38987008  | 14.67853627 |
| O  | -3.65208787  | -3.76712774  | 15.21645539 |
| O  | -2.48074538  | -21.81173656 | 15.14080987 |
| O  | 3.75382231   | -15.82329933 | 15.03866918 |
| Zn | -7.29440542  | -22.85917777 | 14.71170386 |
| Zn | 2.10304838   | -12.38532638 | 14.81447124 |
| Zn | -1.10353773  | -17.00158442 | 14.74458360 |
| Zn | -4.05140605  | -18.44603702 | 14.71558232 |
| Zn | -7.00589206  | -19.72683148 | 14.83693929 |
| Zn | -9.92595692  | -21.10500095 | 14.77668948 |
| Zn | -0.75221430  | -13.83399405 | 14.79150682 |
| Zn | -3.65738086  | -15.07678413 | 14.79488396 |
| Zn | -6.68400363  | -16.50188953 | 14.72933103 |
| Zn | -9.57622744  | -17.80721050 | 14.76057315 |
| Zn | -0.45874294  | -10.47087203 | 14.78339548 |
| Zn | -3.46605231  | -11.90229941 | 14.80121466 |
| Zn | -6.30082597  | -13.33762244 | 14.74259315 |
| Zn | -9.34081906  | -14.61242114 | 14.83384856 |
| Zn | 0.09912006   | -4.12715495  | 14.77951306 |
| Zn | -0.28343503  | -7.29505208  | 14.78345495 |
| Zn | -3.12391074  | -8.74084103  | 14.79494988 |
| Zn | -6.04007043  | -10.01686755 | 14.80033498 |
| Zn | -9.06944542  | -11.39978765 | 14.78173899 |
| Zn | -11.95909893 | -12.75961296 | 14.76057220 |
| Zn | -2.83574145  | -5.42108217  | 14.79795195 |
| Zn | -5.87767617  | -6.83321516  | 14.78541255 |
| Zn | -4.57835927  | -24.94426667 | 14.78368938 |
| Zn | -7.54352288  | -26.20499046 | 14.77129394 |
| Zn | 1.46518926   | -18.92796246 | 14.73649882 |
| Zn | -1.36668669  | -20.32257982 | 14.83612721 |
| Zn | -4.31213841  | -21.60987767 | 14.73823356 |
| Zn | 1.90658008   | -15.57488080 | 14.78416500 |



**27/37 Pt**

202

Lattice="-13.8592929113 -9.6019997917 0.0 1.3859292911 -16.8034996355 0.0 0.0 0.0 20.7163554165"

|    |              |              |            |
|----|--------------|--------------|------------|
| Pt | -12.47336362 | -12.00249974 | 5.50000000 |
| Pt | -11.08743433 | -9.60199979  | 5.50000000 |
| Pt | -9.70150504  | -7.20149984  | 5.50000000 |
| Pt | -12.47336362 | -16.80349964 | 5.50000000 |
| Pt | -11.08743433 | -14.40299969 | 5.50000000 |
| Pt | -9.70150504  | -12.00249974 | 5.50000000 |
| Pt | -8.31557575  | -9.60199979  | 5.50000000 |
| Pt | -6.92964646  | -7.20149984  | 5.50000000 |
| Pt | -5.54371716  | -4.80099990  | 5.50000000 |
| Pt | -12.47336362 | -21.60449953 | 5.50000000 |
| Pt | -11.08743433 | -19.20399958 | 5.50000000 |
| Pt | -9.70150504  | -16.80349964 | 5.50000000 |
| Pt | -8.31557575  | -14.40299969 | 5.50000000 |
| Pt | -6.92964646  | -12.00249974 | 5.50000000 |
| Pt | -5.54371716  | -9.60199979  | 5.50000000 |
| Pt | -4.15778787  | -7.20149984  | 5.50000000 |
| Pt | -2.77185858  | -4.80099990  | 5.50000000 |
| Pt | -1.38592929  | -2.40049995  | 5.50000000 |
| Pt | 0.00000000   | 0.00000000   | 5.50000000 |
| Pt | -11.08743433 | -24.00499948 | 5.50000000 |
| Pt | -9.70150504  | -21.60449953 | 5.50000000 |
| Pt | -8.31557575  | -19.20399958 | 5.50000000 |
| Pt | -6.92964646  | -16.80349964 | 5.50000000 |
| Pt | -5.54371717  | -14.40299969 | 5.50000000 |
| Pt | -4.15778787  | -12.00249974 | 5.50000000 |
| Pt | -2.77185858  | -9.60199979  | 5.50000000 |
| Pt | -1.38592929  | -7.20149984  | 5.50000000 |
| Pt | 0.00000000   | -4.80099990  | 5.50000000 |
| Pt | -6.92964646  | -21.60449953 | 5.50000000 |
| Pt | -5.54371716  | -19.20399958 | 5.50000000 |
| Pt | -4.15778787  | -16.80349964 | 5.50000000 |
| Pt | -2.77185858  | -14.40299969 | 5.50000000 |
| Pt | -1.38592929  | -12.00249974 | 5.50000000 |
| Pt | -0.00000000  | -9.60199979  | 5.50000000 |
| Pt | -2.77185858  | -19.20399958 | 5.50000000 |
| Pt | -1.38592929  | -16.80349964 | 5.50000000 |
| Pt | -0.00000000  | -14.40299969 | 5.50000000 |
| Pt | -11.11257310 | -11.20722051 | 7.80399907 |
| Pt | -9.69967265  | -8.80388328  | 7.78613521 |
| Pt | -8.28968261  | -6.40001161  | 7.78606313 |
| Pt | -11.11683778 | -15.98268855 | 7.79897756 |
| Pt | -9.73124376  | -13.59558646 | 7.79920778 |
| Pt | -8.32154975  | -11.19761178 | 7.78994577 |
| Pt | -6.90390780  | -8.78761763  | 7.79229987 |
| Pt | -5.49992587  | -6.39585508  | 7.82973168 |
| Pt | -4.12771007  | -4.01984159  | 7.87308310 |
| Pt | -11.09007487 | -20.79754206 | 7.77416855 |
| Pt | -9.70881668  | -18.39558186 | 7.78100735 |
| Pt | -8.32518756  | -16.00472764 | 7.78830546 |
| Pt | -6.93445335  | -13.60462310 | 7.78085271 |
| Pt | -5.52880581  | -11.18824757 | 7.78458096 |
| Pt | -4.12725443  | -8.77270013  | 7.82086800 |
| Pt | -2.75286795  | -6.38442805  | 7.88601387 |
| Pt | -1.39826500  | -4.00771112  | 7.90466649 |
| Pt | -0.02964396  | -1.62686831  | 7.82916470 |
| Pt | -12.48727439 | -8.81930885  | 7.78780862 |
| Pt | -9.69651652  | -23.20992956 | 7.77674415 |
| Pt | -8.30237508  | -20.80683234 | 7.77883067 |
| Pt | -6.91589977  | -18.41589567 | 7.79351404 |

|    |              |              |             |
|----|--------------|--------------|-------------|
| Pt | -5.53754166  | -16.02234920 | 7.79095818  |
| Pt | -4.14882051  | -13.61013561 | 7.78572668  |
| Pt | -2.76156151  | -11.18588225 | 7.79597767  |
| Pt | -1.38540071  | -8.76785505  | 7.81980211  |
| Pt | -0.02250101  | -6.37113193  | 7.84985063  |
| Pt | -12.51128205 | -13.59465290 | 7.84368145  |
| Pt | -5.51031626  | -20.81582369 | 7.80565239  |
| Pt | -4.13763863  | -18.43530188 | 7.82179438  |
| Pt | -2.76928411  | -16.03561380 | 7.80157299  |
| Pt | -1.38495771  | -13.61220385 | 7.78876351  |
| Pt | -0.00252208  | -11.18791298 | 7.78425046  |
| Pt | -12.49144216 | -18.37875688 | 7.79200806  |
| Pt | -1.39415936  | -18.44513226 | 7.85662265  |
| Pt | -0.01151881  | -16.03553671 | 7.79589750  |
| Pt | -12.47805059 | -23.21482154 | 7.77769380  |
| Pt | -12.48925458 | -10.40975400 | 10.06300695 |
| Pt | -11.09561498 | -8.00818334  | 10.01455688 |
| Pt | -8.30529291  | -22.41090481 | 10.01148348 |
| Pt | -12.48474081 | -15.18894603 | 10.11574243 |
| Pt | -11.10966674 | -12.79815777 | 10.08713750 |
| Pt | -9.71561623  | -10.40458309 | 10.03825665 |
| Pt | -8.31136232  | -8.00274358  | 10.02459843 |
| Pt | -6.91672704  | -5.60734462  | 10.06260101 |
| Pt | -4.14282140  | -20.02058035 | 10.11667476 |
| Pt | -12.46421387 | -19.99493258 | 10.01546767 |
| Pt | -11.08593496 | -17.59717300 | 10.02883948 |
| Pt | -9.71121371  | -15.20658267 | 10.03284892 |
| Pt | -8.32908732  | -12.80457570 | 10.02053306 |
| Pt | -6.93154366  | -10.39609500 | 10.01359112 |
| Pt | -5.52681278  | -7.99345417  | 10.08158718 |
| Pt | -4.14167928  | -5.61952279  | 10.20276628 |
| Pt | -2.78189114  | -3.20868355  | 10.24759973 |
| Pt | -0.01095827  | -17.61710794 | 10.09974363 |
| Pt | -12.48442066 | -24.80752843 | 10.02312163 |
| Pt | -11.08699968 | -22.40657046 | 9.99627659  |
| Pt | -9.69486122  | -20.00399051 | 10.00765294 |
| Pt | -8.31368589  | -17.61405705 | 10.02618022 |
| Pt | -6.92968601  | -15.21467118 | 10.01482021 |
| Pt | -5.53841057  | -12.79956527 | 10.00337883 |
| Pt | -4.14268357  | -10.39044523 | 10.04525992 |
| Pt | -2.75549799  | -7.98348546  | 10.16718169 |
| Pt | -1.37897257  | -5.59488334  | 10.25586860 |
| Pt | -0.02388492  | -3.19914059  | 10.20149885 |
| Pt | -6.92001158  | -20.02125924 | 10.03308808 |
| Pt | -5.53794685  | -17.62100594 | 10.05451022 |
| Pt | -4.14665377  | -15.21428163 | 10.02737440 |
| Pt | -2.76063136  | -12.79881148 | 10.02957431 |
| Pt | -1.37557282  | -10.39093228 | 10.05017917 |
| Pt | -0.00247895  | -7.98719368  | 10.08866605 |
| Pt | -2.77542903  | -17.62543275 | 10.11975796 |
| Pt | -1.38602701  | -15.20817228 | 10.03672367 |
| Pt | 0.00204130   | -12.79764098 | 10.01880086 |
| Pt | -12.41713513 | -11.94271189 | 12.42263464 |
| Pt | -11.06775149 | -9.56269391  | 12.35795632 |
| Pt | -9.71415514  | -7.19613363  | 12.32491659 |
| Pt | -12.41159817 | -16.84622089 | 12.36802310 |
| Pt | -11.02687425 | -14.40503533 | 12.38095522 |
| Pt | -9.66857887  | -11.98322252 | 12.36239219 |
| Pt | -8.31750371  | -9.59624393  | 12.34011031 |
| Pt | -6.97703105  | -7.21113357  | 12.37272924 |
| Pt | -5.61723274  | -4.81728059  | 12.41988713 |
| Pt | -12.45587324 | -21.62055522 | 12.31593256 |
| Pt | -11.06651822 | -19.22725618 | 12.33970897 |

|    |              |              |             |
|----|--------------|--------------|-------------|
| Pt | -9.69097115  | -16.81915849 | 12.35803635 |
| Pt | -8.30580157  | -14.40194156 | 12.32322300 |
| Pt | -6.92603511  | -12.01033185 | 12.30290229 |
| Pt | -5.57311148  | -9.64774951  | 12.33193475 |
| Pt | -4.20517636  | -7.28006499  | 12.48946966 |
| Pt | -2.80380970  | -4.81819499  | 12.53453632 |
| Pt | -1.37408577  | -2.32396684  | 12.49586424 |
| Pt | -12.45443059 | -26.33954939 | 12.36179804 |
| Pt | -11.07861493 | -23.98506182 | 12.32410805 |
| Pt | -9.70845132  | -21.61200667 | 12.29405554 |
| Pt | -8.33665306  | -19.21662566 | 12.33837830 |
| Pt | -6.95908594  | -16.79987011 | 12.33988857 |
| Pt | -5.55341642  | -14.39868390 | 12.30147358 |
| Pt | -4.15682128  | -12.03542008 | 12.32813662 |
| Pt | -2.75594902  | -9.67940750  | 12.37834149 |
| Pt | -1.33378710  | -7.28518783  | 12.49264971 |
| Pt | 0.06226426   | -4.80423264  | 12.50724013 |
| Pt | -6.97011876  | -21.61846793 | 12.37141836 |
| Pt | -5.61934752  | -19.20963369 | 12.36852422 |
| Pt | -4.19845708  | -16.76605519 | 12.37209746 |
| Pt | -2.77126155  | -14.39513636 | 12.35517847 |
| Pt | -1.36815712  | -12.03200173 | 12.35619300 |
| Pt | 0.04566914   | -9.66158354  | 12.35460083 |
| Pt | -2.84946807  | -19.18047411 | 12.49123607 |
| Pt | -1.39824224  | -16.73842158 | 12.37370653 |
| Pt | 0.01015051   | -14.38320678 | 12.35667264 |
| O  | -11.17147282 | -22.52329719 | 15.22071367 |
| O  | -6.44736002  | -19.34642856 | 15.22881327 |
| O  | -9.72327068  | -19.62226363 | 15.22957341 |
| O  | -1.88519445  | -16.06035542 | 15.35060786 |
| O  | -5.04091488  | -16.38401532 | 15.12938699 |
| O  | -8.29331147  | -16.71622795 | 15.22787479 |
| O  | -11.57544200 | -16.98383021 | 15.36387076 |
| O  | -0.55949708  | -13.10550870 | 15.24124049 |
| O  | -3.77356789  | -13.37830288 | 15.22650443 |
| O  | -6.98298035  | -13.76815090 | 15.18795092 |
| O  | -10.23945927 | -14.10954985 | 15.19258908 |
| O  | -13.01368051 | -19.82700922 | 15.23975220 |
| O  | -2.46181496  | -10.41197187 | 15.22385836 |
| O  | -5.68747162  | -10.76132076 | 15.19863432 |
| O  | -8.91421331  | -11.16234235 | 15.19640676 |
| O  | -12.13664223 | -11.42343457 | 15.09182752 |
| O  | -1.02480245  | -7.56600920  | 14.81640169 |
| O  | -4.33707478  | -7.77178690  | 14.73979847 |
| O  | -7.55488081  | -8.17312739  | 15.27929833 |
| O  | -10.76437900 | -8.46211177  | 15.22817320 |
| O  | 0.36609493   | -4.74344546  | 14.77358148 |
| O  | -2.89045240  | -4.89161131  | 14.93673776 |
| O  | -6.10857125  | -5.20304901  | 15.41642574 |
| O  | -7.94045217  | -22.30111114 | 15.21362037 |
| O  | -1.43573881  | -1.98603423  | 14.77872732 |
| O  | -3.20249461  | -19.05768434 | 14.71443078 |
| O  | 1.28551800   | -15.83987177 | 15.28732723 |
| Zn | -12.84648856 | -21.69971847 | 14.95415322 |
| Zn | -8.17132795  | -18.58268558 | 14.96047420 |
| Zn | -11.41883352 | -18.84096831 | 14.98739928 |
| Zn | -3.54534712  | -15.22516907 | 14.96861443 |
| Zn | -6.77715353  | -15.62743448 | 14.92049473 |
| Zn | -10.00855017 | -15.98199319 | 14.99099800 |
| Zn | -13.18694756 | -16.25701975 | 14.84027604 |
| Zn | -2.24701059  | -12.29622878 | 14.97747803 |
| Zn | -5.49155050  | -12.63309322 | 14.96714279 |
| Zn | -8.69653942  | -13.02690579 | 14.92687517 |

|    |              |              |             |
|----|--------------|--------------|-------------|
| Zn | -11.85400467 | -13.26415271 | 14.80919381 |
| Zn | -0.84810132  | -9.52365699  | 14.88330072 |
| Zn | -4.17113593  | -9.74380128  | 14.77247173 |
| Zn | -7.41721733  | -10.03198248 | 14.94921702 |
| Zn | -10.57130990 | -10.31151339 | 14.93150205 |
| Zn | -13.71972886 | -10.43329821 | 14.88074147 |
| Zn | -2.73499278  | -6.78075417  | 14.82429339 |
| Zn | -6.12910163  | -7.02762078  | 14.94696308 |
| Zn | -9.24555737  | -7.37068084  | 14.96175194 |
| Zn | -11.02892700 | -24.38355734 | 14.96683797 |
| Zn | -1.31238206  | -3.86718874  | 14.79622924 |
| Zn | -4.67899981  | -4.16933231  | 14.86190306 |
| Zn | -6.41671599  | -21.22078731 | 15.01960446 |
| Zn | -9.62363761  | -21.48405385 | 14.93086241 |
| Zn | -1.72594478  | -17.81781779 | 14.80907702 |
| Zn | -5.00308283  | -18.22874907 | 14.80757185 |
| Zn | -0.37016232  | -14.96502849 | 15.00055684 |

### 13/21 Cu

110

Lattice="-7.6579664403 -8.8426579714 0.0 3.8289832201 -11.0533224643 0.0 0.0 0.0 20.1794196661"

|    |             |              |            |
|----|-------------|--------------|------------|
| Cu | -6.38163870 | -11.05332246 | 5.50000000 |
| Cu | -5.10531096 | -8.84265797  | 5.50000000 |
| Cu | -3.82898322 | -6.63199348  | 5.50000000 |
| Cu | -2.55265548 | -4.42132899  | 5.50000000 |
| Cu | -1.27632774 | -2.21066449  | 5.50000000 |
| Cu | 0.00000000  | 0.00000000   | 5.50000000 |
| Cu | -5.10531096 | -13.26398696 | 5.50000000 |
| Cu | -3.82898322 | -11.05332246 | 5.50000000 |
| Cu | -2.55265548 | -8.84265797  | 5.50000000 |
| Cu | -1.27632774 | -6.63199348  | 5.50000000 |
| Cu | -0.00000000 | -4.42132899  | 5.50000000 |
| Cu | -3.82898322 | -15.47465145 | 5.50000000 |
| Cu | -2.55265548 | -13.26398696 | 5.50000000 |
| Cu | -1.27632774 | -11.05332246 | 5.50000000 |
| Cu | -0.00000000 | -8.84265797  | 5.50000000 |
| Cu | 1.27632774  | -6.63199348  | 5.50000000 |
| Cu | -2.55265548 | -17.68531594 | 5.50000000 |
| Cu | -1.27632774 | -15.47465145 | 5.50000000 |
| Cu | -0.00000000 | -13.26398696 | 5.50000000 |
| Cu | 1.27632774  | -11.05332246 | 5.50000000 |
| Cu | 2.55265548  | -8.84265797  | 5.50000000 |
| Cu | -5.10515074 | -10.31717338 | 7.56212272 |
| Cu | -3.82970689 | -8.10601101  | 7.55809348 |
| Cu | -2.55474460 | -5.89516778  | 7.55764842 |
| Cu | -1.28235303 | -3.68578137  | 7.56188849 |
| Cu | 0.00450675  | -1.47458208  | 7.55565798 |
| Cu | -6.37850340 | -8.10647079  | 7.56209335 |
| Cu | -3.83405004 | -12.53016151 | 7.56355888 |
| Cu | -2.54644972 | -10.31441864 | 7.57059495 |
| Cu | -1.27308243 | -8.10749535  | 7.56278168 |
| Cu | -0.00217003 | -5.89273249  | 7.58064105 |
| Cu | 1.27728563  | -3.68523166  | 7.55616603 |
| Cu | -2.55785501 | -14.73097853 | 7.56823836 |
| Cu | -1.27568690 | -12.52926509 | 7.54780321 |
| Cu | 0.00141579  | -10.31249512 | 7.56200819 |
| Cu | 1.27410107  | -8.10556264  | 7.55885837 |
| Cu | -5.10466390 | -14.73541072 | 7.56668906 |
| Cu | -5.10472799 | -5.89880840  | 7.57185103 |
| Cu | 0.00173330  | -14.74324316 | 7.56211845 |
| Cu | 1.27371076  | -12.53455967 | 7.56390423 |
| Cu | 2.55153700  | -10.31216965 | 7.56099628 |
| Cu | -3.83060380 | -16.94534184 | 7.55203522 |

|    |             |              |             |
|----|-------------|--------------|-------------|
| Cu | -6.37560766 | -9.57464710  | 9.60985227  |
| Cu | -5.10480681 | -7.39214882  | 9.62030023  |
| Cu | -3.81811510 | -5.15787270  | 9.61031345  |
| Cu | -2.55699275 | -2.96358328  | 9.62685216  |
| Cu | 2.55625780  | -11.79298082 | 9.57298705  |
| Cu | -3.82130542 | -18.41574684 | 9.58933893  |
| Cu | -5.11145270 | -11.79910808 | 9.60099084  |
| Cu | -3.83432420 | -9.56967673  | 9.59382825  |
| Cu | -2.55050755 | -7.36850237  | 9.58380941  |
| Cu | -1.30070757 | -5.14970570  | 9.61438353  |
| Cu | -0.00443336 | -2.95400779  | 9.57952154  |
| Cu | -3.84013750 | -13.99309699 | 9.63878315  |
| Cu | -2.54145330 | -11.80568404 | 9.57987240  |
| Cu | -1.25645833 | -9.56962640  | 9.62572420  |
| Cu | 0.00306011  | -7.38559278  | 9.61167857  |
| Cu | 1.29039217  | -5.14183188  | 9.60753021  |
| Cu | -2.56438872 | -16.21288320 | 9.58578199  |
| Cu | -1.27187680 | -13.99511408 | 9.58721976  |
| Cu | -0.00929401 | -11.78916329 | 9.58166445  |
| Cu | 1.26903192  | -9.57031535  | 9.61288604  |
| Cu | 2.55320708  | -7.36887344  | 9.58709313  |
| Cu | -6.41241739 | -11.05795580 | 11.61412434 |
| Cu | -5.11261069 | -8.88639236  | 11.75030510 |
| Cu | -3.82473727 | -6.65061687  | 11.62741691 |
| Cu | -2.58198999 | -4.41574837  | 11.79540238 |
| Cu | -1.25958952 | -2.20667530  | 11.62408831 |
| Cu | 3.80613939  | -11.03076538 | 11.62623831 |
| Cu | -5.09994133 | -13.22702649 | 11.76878342 |
| Cu | -3.79525719 | -11.05654253 | 11.55525577 |
| Cu | -2.54732842 | -8.82788112  | 11.62624244 |
| Cu | -1.27617238 | -6.63399303  | 11.61717329 |
| Cu | -0.01299122 | -4.43310441  | 11.61948377 |
| Cu | -3.84593501 | -15.48725622 | 11.66274269 |
| Cu | -2.52986290 | -13.28206626 | 11.67608928 |
| Cu | -1.29037523 | -11.05094474 | 11.65072099 |
| Cu | 0.03138457  | -8.84613215  | 11.79204667 |
| Cu | 1.28095861  | -6.61147762  | 11.59816494 |
| Cu | -2.52857273 | -17.68114760 | 11.65096269 |
| Cu | -1.29857543 | -15.47389359 | 11.57795693 |
| Cu | -0.00040709 | -13.23861790 | 11.64732872 |
| Cu | 1.27403950  | -11.07943398 | 11.58875611 |
| Cu | 2.57512667  | -8.84055351  | 11.62562316 |
| O  | 0.63494121  | -12.15325499 | 14.42881711 |
| O  | -2.00137334 | -14.01728550 | 14.37811354 |
| O  | -4.66347432 | -15.90175258 | 14.39000564 |
| O  | 0.31940063  | -8.92010286  | 14.03238886 |
| O  | -2.31745993 | -10.81225572 | 14.45954353 |
| O  | -4.97468191 | -12.69044825 | 14.06098228 |
| O  | 0.05065926  | -5.69973712  | 14.51346614 |
| O  | -2.59975829 | -7.57197686  | 14.51228199 |
| O  | -5.24085831 | -9.41761138  | 14.05203617 |
| O  | -0.24260351 | -2.46453528  | 14.45084626 |
| O  | -2.87283098 | -4.34661855  | 14.03838558 |
| O  | -1.72319395 | -17.25129547 | 14.39896857 |
| O  | 3.29035061  | -10.29318482 | 14.36459136 |
| Zn | -1.22126527 | -12.31585221 | 14.12742016 |
| Zn | -3.84531231 | -14.23168869 | 14.09333903 |
| Zn | 1.13405491  | -7.19476083  | 14.18764065 |
| Zn | -1.58147902 | -9.11164478  | 14.16173655 |
| Zn | -4.15166027 | -10.97712422 | 14.12718417 |
| Zn | 0.78621531  | -4.00770717  | 14.16007385 |
| Zn | -1.78486114 | -5.91316270  | 14.19411151 |
| Zn | -4.43651061 | -7.68629928  | 14.14769061 |

|    |             |              |             |
|----|-------------|--------------|-------------|
| Zn | -7.13813868 | -9.62183826  | 14.11458413 |
| Zn | -2.09848355 | -2.59811935  | 14.14624702 |
| Zn | -0.94686847 | -15.55612962 | 14.18070958 |
| Zn | -3.58768313 | -17.43246850 | 14.15599083 |
| Zn | 1.43134625  | -10.47462401 | 14.15452179 |

### 31/39 Ag

218

Lattice="-13.0143003077 -12.52301631 0.0 4.3381001026 -17.532222834 0.0 0.0 0.0 21.0108040538"

|    |              |              |            |
|----|--------------|--------------|------------|
| Ag | -11.56826694 | -15.02761957 | 5.50000000 |
| Ag | -10.12223357 | -12.52301631 | 5.50000000 |
| Ag | -8.67620021  | -10.01841305 | 5.50000000 |
| Ag | -7.23016684  | -7.51380979  | 5.50000000 |
| Ag | -10.12223357 | -17.53222283 | 5.50000000 |
| Ag | -8.67620020  | -15.02761957 | 5.50000000 |
| Ag | -7.23016684  | -12.52301631 | 5.50000000 |
| Ag | -5.78413347  | -10.01841305 | 5.50000000 |
| Ag | -4.33810010  | -7.51380978  | 5.50000000 |
| Ag | -2.89206673  | -5.00920652  | 5.50000000 |
| Ag | -1.44603337  | -2.50460326  | 5.50000000 |
| Ag | 0.00000000   | 0.00000000   | 5.50000000 |
| Ag | -10.12223357 | -22.54142936 | 5.50000000 |
| Ag | -8.67620021  | -20.03682610 | 5.50000000 |
| Ag | -7.23016684  | -17.53222283 | 5.50000000 |
| Ag | -5.78413347  | -15.02761957 | 5.50000000 |
| Ag | -4.33810010  | -12.52301631 | 5.50000000 |
| Ag | -2.89206673  | -10.01841305 | 5.50000000 |
| Ag | -1.44603337  | -7.51380979  | 5.50000000 |
| Ag | 0.00000000   | -5.00920652  | 5.50000000 |
| Ag | -8.67620021  | -25.04603262 | 5.50000000 |
| Ag | -7.23016684  | -22.54142936 | 5.50000000 |
| Ag | -5.78413347  | -20.03682610 | 5.50000000 |
| Ag | -4.33810010  | -17.53222283 | 5.50000000 |
| Ag | -2.89206674  | -15.02761957 | 5.50000000 |
| Ag | -1.44603337  | -12.52301631 | 5.50000000 |
| Ag | 0.00000000   | -10.01841305 | 5.50000000 |
| Ag | 1.44603337   | -7.51380979  | 5.50000000 |
| Ag | -7.23016684  | -27.55063588 | 5.50000000 |
| Ag | -5.78413347  | -25.04603262 | 5.50000000 |
| Ag | -4.33810010  | -22.54142936 | 5.50000000 |
| Ag | -2.89206674  | -20.03682610 | 5.50000000 |
| Ag | -1.44603337  | -17.53222283 | 5.50000000 |
| Ag | -0.00000000  | -15.02761957 | 5.50000000 |
| Ag | 1.44603337   | -12.52301631 | 5.50000000 |
| Ag | -1.44603337  | -22.54142936 | 5.50000000 |
| Ag | 0.00000000   | -20.03682610 | 5.50000000 |
| Ag | 1.44603337   | -17.53222283 | 5.50000000 |
| Ag | 2.89206673   | -15.02761957 | 5.50000000 |
| Ag | -10.12846120 | -14.19082139 | 7.86994531 |
| Ag | -8.67575851  | -11.68470546 | 7.87288839 |
| Ag | -7.23051493  | -9.17899865  | 7.86436064 |
| Ag | -5.78438314  | -6.67184422  | 7.87351821 |
| Ag | -8.67858038  | -16.69913642 | 7.87264840 |
| Ag | -7.23538486  | -14.19647223 | 7.87395863 |
| Ag | -5.78351269  | -11.68641216 | 7.87136824 |
| Ag | -4.33901341  | -9.18464845  | 7.87045670 |
| Ag | -2.88995921  | -6.67741040  | 7.87193366 |
| Ag | -1.44653746  | -4.17595198  | 7.87399362 |
| Ag | -0.00118399  | -1.67407493  | 7.87261482 |
| Ag | -11.56856229 | -11.68762813 | 7.87557062 |
| Ag | -8.67271859  | -21.71105098 | 7.86756064 |
| Ag | -7.23383041  | -19.20227221 | 7.86894042 |
| Ag | -5.78858445  | -16.69705277 | 7.87030504 |

|    |              |              |             |
|----|--------------|--------------|-------------|
| Ag | -4.34497569  | -14.19315658 | 7.86518373  |
| Ag | -2.89588410  | -11.68573504 | 7.86985406  |
| Ag | -1.44427899  | -9.18438377  | 7.86137980  |
| Ag | -0.00347493  | -6.67719656  | 7.87254913  |
| Ag | -11.56616530 | -16.69855754 | 7.86832640  |
| Ag | -7.22567497  | -24.21103685 | 7.87414613  |
| Ag | -5.78303557  | -21.70432153 | 7.86801393  |
| Ag | -4.34067074  | -19.19985595 | 7.87436049  |
| Ag | -2.89372143  | -16.69316046 | 7.87064888  |
| Ag | -1.45113095  | -14.19286357 | 7.87322597  |
| Ag | 0.00490946   | -11.68760349 | 7.87246753  |
| Ag | 1.44768190   | -9.18679444  | 7.87121568  |
| Ag | -10.12118630 | -19.20668829 | 7.87500262  |
| Ag | -5.78302860  | -26.71920577 | 7.87176642  |
| Ag | -4.33525020  | -24.20778505 | 7.87135254  |
| Ag | -2.89185041  | -21.70448883 | 7.87089549  |
| Ag | -1.44794413  | -19.19952488 | 7.86921675  |
| Ag | -0.00387430  | -16.69528429 | 7.87354168  |
| Ag | 1.44393615   | -14.19535677 | 7.86762910  |
| Ag | -10.12189262 | -24.21101911 | 7.87309382  |
| Ag | 0.00199172   | -21.70118858 | 7.86728561  |
| Ag | 1.44188737   | -19.19853249 | 7.87365618  |
| Ag | 2.89469680   | -16.69370643 | 7.87216272  |
| Ag | -8.67875564  | -26.71478364 | 7.87086700  |
| Ag | -11.58217632 | -13.35597557 | 10.21672503 |
| Ag | -10.11908159 | -10.86006527 | 10.22375079 |
| Ag | -4.33954977  | -25.87762392 | 10.20511058 |
| Ag | -2.89525864  | -23.37596662 | 10.22134589 |
| Ag | -10.11650915 | -15.85553091 | 10.20781498 |
| Ag | -8.68883371  | -13.35702601 | 10.19796580 |
| Ag | -7.22306749  | -10.83231779 | 10.20280838 |
| Ag | -5.78449237  | -8.34375853  | 10.19866359 |
| Ag | -4.32959065  | -5.82767306  | 10.19973344 |
| Ag | -2.88599800  | -3.33223908  | 10.21012301 |
| Ag | 2.89262369   | -18.36301666 | 10.19599895 |
| Ag | -8.66784007  | -28.36946758 | 10.21882633 |
| Ag | -10.10913855 | -20.89056343 | 10.20464613 |
| Ag | -8.68051235  | -18.36466620 | 10.21708338 |
| Ag | -7.22543929  | -15.87272821 | 10.21939362 |
| Ag | -5.79253633  | -13.35523202 | 10.20350428 |
| Ag | -4.33990117  | -10.85274958 | 10.22648090 |
| Ag | -2.88384322  | -8.35854725  | 10.19666287 |
| Ag | -1.45103755  | -5.84290167  | 10.22771926 |
| Ag | 0.01174338   | -3.35811386  | 10.21063282 |
| Ag | -8.67513114  | -23.38382732 | 10.21108121 |
| Ag | -7.23188580  | -20.87220569 | 10.20682320 |
| Ag | -5.80083974  | -18.37076633 | 10.20547039 |
| Ag | -4.34110612  | -15.85640468 | 10.20531208 |
| Ag | -2.91592169  | -13.35678433 | 10.19992880 |
| Ag | -1.44364530  | -10.85135239 | 10.19639826 |
| Ag | -0.00482502  | -8.35117238  | 10.20002014 |
| Ag | 1.44460272   | -5.84689815  | 10.20081358 |
| Ag | -7.22527119  | -25.88532434 | 10.19916639 |
| Ag | -5.77672006  | -23.35803625 | 10.21010949 |
| Ag | -4.33042907  | -20.87297476 | 10.20808951 |
| Ag | -2.89404881  | -18.35466805 | 10.20284711 |
| Ag | -1.44669706  | -15.85757168 | 10.22312338 |
| Ag | 0.00052240   | -13.36412660 | 10.19817082 |
| Ag | 1.44934188   | -10.84907127 | 10.22659171 |
| Ag | -1.44161920  | -20.87603408 | 10.20499884 |
| Ag | -0.02153398  | -18.36641395 | 10.21539442 |
| Ag | 1.44621263   | -15.87094064 | 10.20894242 |
| Ag | 2.87429458   | -13.35849971 | 10.20646556 |

|    |              |              |             |
|----|--------------|--------------|-------------|
| Ag | -11.55974801 | -15.02600978 | 12.56103184 |
| Ag | -10.14699968 | -12.56392678 | 12.57557669 |
| Ag | -8.67450258  | -10.00528762 | 12.56636963 |
| Ag | -7.22867241  | -7.53975177  | 12.56624850 |
| Ag | -10.15867517 | -17.51025519 | 12.55119013 |
| Ag | -8.63334093  | -15.03023346 | 12.55465904 |
| Ag | -7.26499394  | -12.48579773 | 12.50751619 |
| Ag | -5.75821522  | -9.99193829  | 12.58306562 |
| Ag | -4.31476045  | -7.49388764  | 12.49914073 |
| Ag | -2.89687197  | -4.97613008  | 12.58473361 |
| Ag | -1.38915688  | -2.49724221  | 12.52754731 |
| Ag | 4.30074698   | -17.48303454 | 12.55939273 |
| Ag | -10.10070404 | -22.56473316 | 12.59364853 |
| Ag | -8.66854982  | -20.01564813 | 12.56248979 |
| Ag | -7.24656149  | -17.54748987 | 12.59176645 |
| Ag | -5.77020430  | -15.00550524 | 12.56769129 |
| Ag | -4.37229161  | -12.52497646 | 12.58621117 |
| Ag | -2.87867050  | -10.03119330 | 12.57245454 |
| Ag | -1.44748197  | -7.52395749  | 12.56871533 |
| Ag | -0.00428079  | -5.05674955  | 12.58768473 |
| Ag | -8.68298907  | -25.09682237 | 12.52852723 |
| Ag | -7.25684296  | -22.53885621 | 12.56437135 |
| Ag | -5.76404463  | -20.06897592 | 12.54939531 |
| Ag | -4.38545849  | -17.53518857 | 12.52706479 |
| Ag | -2.89053511  | -15.02833898 | 12.56812941 |
| Ag | -1.46986313  | -12.54280763 | 12.49896749 |
| Ag | -0.01527445  | -10.01094365 | 12.56978535 |
| Ag | 1.47469590   | -7.54548777  | 12.50822089 |
| Ag | -7.17941562  | -27.54002936 | 12.58399800 |
| Ag | -5.78796188  | -24.99762229 | 12.52825718 |
| Ag | -4.31920061  | -22.52562918 | 12.59097343 |
| Ag | -2.85916603  | -20.00357833 | 12.53376002 |
| Ag | -1.47688644  | -17.50459173 | 12.59124944 |
| Ag | 0.03506335   | -15.02255694 | 12.56704191 |
| Ag | 1.41363041   | -12.49854776 | 12.57590543 |
| Ag | -1.45881822  | -22.56048194 | 12.56589529 |
| Ag | 0.00659358   | -20.05537576 | 12.56409152 |
| Ag | 1.41388795   | -17.57902986 | 12.53901919 |
| Ag | 2.87891597   | -15.02484045 | 12.56114968 |
| O  | 1.14625101   | -18.60999963 | 15.35652560 |
| O  | -1.52573031  | -20.48426832 | 15.42304147 |
| O  | -4.17705037  | -22.35077889 | 15.22811462 |
| O  | -6.82621122  | -24.20638883 | 15.38670619 |
| O  | -9.48461208  | -26.04481129 | 15.40541974 |
| O  | 0.85892466   | -15.38919460 | 15.36295019 |
| O  | -1.78401936  | -17.25718495 | 15.24556406 |
| O  | -4.45263155  | -19.10788875 | 15.39156771 |
| O  | -7.10832457  | -20.96736407 | 15.43567828 |
| O  | -9.77731230  | -22.81587418 | 15.25874500 |
| O  | 0.59372766   | -12.16343563 | 15.36540969 |
| O  | -2.07259262  | -14.01235118 | 15.41212614 |
| O  | -4.72808609  | -15.88485277 | 15.43285725 |
| O  | -7.38608367  | -17.73242937 | 15.23158723 |
| O  | -10.05607446 | -19.59656255 | 15.40122380 |
| O  | 0.30513581   | -8.92087392  | 15.41668136 |
| O  | -2.35039452  | -10.78321681 | 15.38623126 |
| O  | -5.00056930  | -12.64923267 | 15.30983482 |
| O  | -7.67836509  | -14.51081937 | 15.37549334 |
| O  | -10.32469205 | -16.37081741 | 15.40603385 |
| O  | 0.02042915   | -5.68231564  | 15.29609682 |
| O  | -2.64046137  | -7.55897596  | 15.41926872 |
| O  | -5.30116574  | -9.42171137  | 15.33744660 |
| O  | -7.93972647  | -11.28502830 | 15.40886614 |



|    |              |              |             |
|----|--------------|--------------|-------------|
| O  | -10.60641487 | -13.12441319 | 15.30937884 |
| O  | -0.27147110  | -2.47078241  | 15.37657494 |
| O  | -2.91814770  | -4.33126000  | 15.30479325 |
| O  | -5.56907347  | -6.18081967  | 15.40464991 |
| O  | -8.23290729  | -8.04035360  | 15.41190108 |
| O  | -6.56036511  | -27.43949423 | 15.28538169 |
| O  | 3.81469811   | -16.77485909 | 15.32277536 |
| Zn | -0.71390064  | -18.80765705 | 15.23564257 |
| Zn | -3.38604918  | -20.64123059 | 15.21877839 |
| Zn | -6.05326052  | -22.50603326 | 15.23755690 |
| Zn | -8.68853586  | -24.35119248 | 15.21904852 |
| Zn | 1.66839109   | -13.70014168 | 15.25322413 |
| Zn | -1.00843044  | -15.54119392 | 15.23327541 |
| Zn | -3.65916046  | -17.41459772 | 15.22336704 |
| Zn | -6.31245473  | -19.27987710 | 15.22868293 |
| Zn | -8.96831386  | -21.11598388 | 15.24724530 |
| Zn | 1.36217689   | -10.45903372 | 15.26127046 |
| Zn | -1.27443128  | -12.31793023 | 15.24180206 |
| Zn | -3.93238203  | -14.19547209 | 15.27506580 |
| Zn | -6.58639155  | -16.02730817 | 15.24121377 |
| Zn | -9.26196173  | -17.90881055 | 15.22672295 |
| Zn | 1.09271934   | -7.22526804  | 15.22916105 |
| Zn | -1.55921345  | -9.08503302  | 15.30050091 |
| Zn | -4.21271786  | -10.94539637 | 15.26677436 |
| Zn | -6.87080671  | -12.82282906 | 15.22287370 |
| Zn | -9.54529557  | -14.67436017 | 15.22929658 |
| Zn | 0.82785443   | -3.98363595  | 15.24748019 |
| Zn | -1.84581683  | -5.87360428  | 15.25042052 |
| Zn | -4.50540698  | -7.72072214  | 15.24272130 |
| Zn | -7.17187948  | -9.57943468  | 15.27757375 |
| Zn | -9.79695196  | -11.42898589 | 15.23047828 |
| Zn | -12.47272786 | -13.31343860 | 15.21494590 |
| Zn | -2.13936937  | -2.62313398  | 15.21046731 |
| Zn | -0.45294433  | -22.01231299 | 15.25007331 |
| Zn | -3.08693101  | -23.88771940 | 15.24700803 |
| Zn | -5.75321960  | -25.74169380 | 15.21877578 |
| Zn | -8.43597945  | -27.58624507 | 15.22873083 |
| Zn | 1.94499517   | -16.91230889 | 15.21098844 |

### 31/39 Au

218

Lattice="-12.9824805026 -12.4923976882 0.0 4.3274935009 -17.4893567635 0.0 0.0 0.0 20.9934835457"

|    |              |              |            |
|----|--------------|--------------|------------|
| Au | -11.53998267 | -14.99087723 | 5.50000000 |
| Au | -10.09748484 | -12.49239769 | 5.50000000 |
| Au | -8.65498700  | -9.99391815  | 5.50000000 |
| Au | -7.21248917  | -7.49543861  | 5.50000000 |
| Au | -10.09748483 | -17.48935676 | 5.50000000 |
| Au | -8.65498700  | -14.99087723 | 5.50000000 |
| Au | -7.21248917  | -12.49239769 | 5.50000000 |
| Au | -5.76999133  | -9.99391815  | 5.50000000 |
| Au | -4.32749350  | -7.49543861  | 5.50000000 |
| Au | -2.88499567  | -4.99695908  | 5.50000000 |
| Au | -1.44249783  | -2.49847954  | 5.50000000 |
| Au | 0.00000000   | 0.00000000   | 5.50000000 |
| Au | -10.09748484 | -22.48631584 | 5.50000000 |
| Au | -8.65498700  | -19.98783630 | 5.50000000 |
| Au | -7.21248917  | -17.48935676 | 5.50000000 |
| Au | -5.76999133  | -14.99087723 | 5.50000000 |
| Au | -4.32749350  | -12.49239769 | 5.50000000 |
| Au | -2.88499567  | -9.99391815  | 5.50000000 |
| Au | -1.44249783  | -7.49543861  | 5.50000000 |
| Au | 0.00000000   | -4.99695908  | 5.50000000 |
| Au | -8.65498700  | -24.98479538 | 5.50000000 |

|    |              |              |             |
|----|--------------|--------------|-------------|
| Au | -7.21248917  | -22.48631584 | 5.50000000  |
| Au | -5.76999133  | -19.98783630 | 5.50000000  |
| Au | -4.32749350  | -17.48935676 | 5.50000000  |
| Au | -2.88499567  | -14.99087723 | 5.50000000  |
| Au | -1.44249783  | -12.49239769 | 5.50000000  |
| Au | 0.00000000   | -9.99391815  | 5.50000000  |
| Au | 1.44249783   | -7.49543861  | 5.50000000  |
| Au | -7.21248917  | -27.48327491 | 5.50000000  |
| Au | -5.76999133  | -24.98479538 | 5.50000000  |
| Au | -4.32749350  | -22.48631584 | 5.50000000  |
| Au | -2.88499567  | -19.98783630 | 5.50000000  |
| Au | -1.44249783  | -17.48935676 | 5.50000000  |
| Au | -0.00000000  | -14.99087723 | 5.50000000  |
| Au | 1.44249783   | -12.49239769 | 5.50000000  |
| Au | -1.44249783  | -22.48631584 | 5.50000000  |
| Au | 0.00000000   | -19.98783630 | 5.50000000  |
| Au | 1.44249783   | -17.48935676 | 5.50000000  |
| Au | 2.88499567   | -14.99087723 | 5.50000000  |
| Au | -10.10486297 | -14.15440031 | 7.95416792  |
| Au | -8.65247859  | -11.66115526 | 7.95802421  |
| Au | -7.21120103  | -9.15949410  | 7.94851121  |
| Au | -5.76983334  | -6.65906447  | 7.96087326  |
| Au | -8.65824403  | -16.65461425 | 7.95271839  |
| Au | -7.21636712  | -14.16273899 | 7.96060186  |
| Au | -5.76982950  | -11.65895540 | 7.95433894  |
| Au | -4.32664851  | -9.16384531  | 7.95586596  |
| Au | -2.88769456  | -6.66173332  | 7.95633537  |
| Au | -1.44279074  | -4.16484068  | 7.95336255  |
| Au | -0.00478012  | -1.66825954  | 7.95765518  |
| Au | -11.53908396 | -11.65917091 | 7.95773743  |
| Au | -8.65530802  | -21.66143977 | 7.94676880  |
| Au | -7.21952792  | -19.15395318 | 7.94789926  |
| Au | -5.77145479  | -16.65861339 | 7.95173313  |
| Au | -4.33321524  | -14.15737630 | 7.94767935  |
| Au | -2.88732602  | -11.66091541 | 7.95687901  |
| Au | -1.44117731  | -9.16371003  | 7.94782094  |
| Au | -0.00812310  | -6.66205433  | 7.95693134  |
| Au | -11.54004164 | -16.65842215 | 7.94979990  |
| Au | -7.20892580  | -24.15377016 | 7.96099705  |
| Au | -5.76830483  | -21.65123745 | 7.94731188  |
| Au | -4.32772985  | -19.15364053 | 7.95922426  |
| Au | -2.88317802  | -16.64888556 | 7.95126761  |
| Au | -1.44328132  | -14.15485393 | 7.96140950  |
| Au | 0.00353014   | -11.65825769 | 7.96184421  |
| Au | 1.44205964   | -9.16190984  | 7.95574384  |
| Au | -10.10047202 | -19.15977959 | 7.96043046  |
| Au | -5.76884220  | -26.65827041 | 7.95478983  |
| Au | -4.32759063  | -24.15218731 | 7.95247053  |
| Au | -2.88270644  | -21.65510078 | 7.95023263  |
| Au | -1.44528633  | -19.15253346 | 7.94937166  |
| Au | -0.00061488  | -16.65510964 | 7.95468228  |
| Au | 1.44012636   | -14.16024474 | 7.95097520  |
| Au | 2.88186776   | -11.66118812 | 7.95223014  |
| Au | 0.00416095   | -21.64820698 | 7.94574260  |
| Au | 1.43873334   | -19.14891196 | 7.95920230  |
| Au | 2.89013597   | -16.65081337 | 7.95504002  |
| Au | -8.65571123  | -26.64774098 | 7.95448464  |
| Au | -11.55851808 | -13.32383253 | 10.33586393 |
| Au | -10.09060816 | -10.84052898 | 10.34490573 |
| Au | -4.32778724  | -25.81658730 | 10.32513341 |
| Au | -2.88508309  | -23.32201907 | 10.34002276 |
| Au | -10.09664251 | -15.81969237 | 10.32467362 |
| Au | -8.66776272  | -13.33026972 | 10.32512815 |

|    |              |              |             |
|----|--------------|--------------|-------------|
| Au | -7.20439809  | -10.81306625 | 10.32546167 |
| Au | -5.76863657  | -8.32552347  | 10.32367489 |
| Au | -4.32418549  | -5.81297552  | 10.32594795 |
| Au | -2.88018706  | -3.32109048  | 10.32757735 |
| Au | 2.88069055   | -18.31254444 | 10.32303056 |
| Au | -8.64472995  | -28.30121957 | 10.33930728 |
| Au | -10.08573045 | -20.83607461 | 10.32618377 |
| Au | -8.66430875  | -18.31884558 | 10.33258134 |
| Au | -7.21029123  | -15.83320259 | 10.34016685 |
| Au | -5.77872397  | -13.32306013 | 10.32585671 |
| Au | -4.32788079  | -10.82638870 | 10.34668699 |
| Au | -2.87974913  | -8.33373522  | 10.32345271 |
| Au | -1.45229577  | -5.82810362  | 10.34513837 |
| Au | 0.00372762   | -3.34653161  | 10.32937659 |
| Au | -8.65185158  | -23.33011545 | 10.32657074 |
| Au | -7.21446522  | -20.82144285 | 10.31806249 |
| Au | -5.78401280  | -18.32625808 | 10.32433708 |
| Au | -4.33051423  | -15.81712842 | 10.32206360 |
| Au | -2.90398131  | -13.32280357 | 10.32735208 |
| Au | -1.44047617  | -10.82437598 | 10.32649790 |
| Au | -0.00324581  | -8.32962245  | 10.32470106 |
| Au | 1.43481916   | -5.83421195  | 10.32428240 |
| Au | -7.20262947  | -25.82544241 | 10.32211110 |
| Au | -5.76047977  | -23.30573549 | 10.32987933 |
| Au | -4.31803163  | -20.82245851 | 10.32536086 |
| Au | -2.88857039  | -18.30676754 | 10.32076330 |
| Au | -1.44061310  | -15.81283081 | 10.34329569 |
| Au | 0.00064080   | -13.32532833 | 10.32842177 |
| Au | 1.44659446   | -10.82131714 | 10.34718772 |
| Au | -1.43953859  | -20.82066695 | 10.32028188 |
| Au | -0.02096850  | -18.31554292 | 10.33407548 |
| Au | 1.44273924   | -15.82747323 | 10.32856615 |
| Au | 2.87189618   | -13.32351984 | 10.32448569 |
| Au | -11.53803417 | -14.99393472 | 12.75387112 |
| Au | -10.11866087 | -12.51774834 | 12.77305361 |
| Au | -8.65183637  | -9.97377211  | 12.76204238 |
| Au | -7.19941506  | -7.50345173  | 12.76996067 |
| Au | -10.12864916 | -17.48602241 | 12.75412518 |
| Au | -8.64140052  | -14.99590258 | 12.76278256 |
| Au | -7.24620825  | -12.46409007 | 12.72249735 |
| Au | -5.75296334  | -9.97370791  | 12.77752895 |
| Au | -4.30935022  | -7.47357520  | 12.72133353 |
| Au | -2.88211094  | -4.97022398  | 12.77046987 |
| Au | -1.40934670  | -2.48232844  | 12.73805346 |
| Au | 4.30186849   | -17.45403910 | 12.76433408 |
| Au | -10.08009627 | -22.51044888 | 12.76924841 |
| Au | -8.64481383  | -19.97805923 | 12.75808699 |
| Au | -7.23098635  | -17.49536088 | 12.76484702 |
| Au | -5.77395260  | -14.96522678 | 12.76532939 |
| Au | -4.35454929  | -12.48210399 | 12.77617709 |
| Au | -2.88029684  | -9.99401798  | 12.77625850 |
| Au | -1.43677580  | -7.50466715  | 12.76800054 |
| Au | -0.00835212  | -5.02883616  | 12.77358046 |
| Au | -8.64758379  | -25.02343772 | 12.73269898 |
| Au | -7.22596465  | -22.48191984 | 12.75555174 |
| Au | -5.75309312  | -20.00818941 | 12.74715206 |
| Au | -4.36951249  | -17.47984539 | 12.73461731 |
| Au | -2.89845548  | -14.98218285 | 12.76458318 |
| Au | -1.46147276  | -12.49900742 | 12.72797953 |
| Au | -0.01284549  | -9.99676482  | 12.77465016 |
| Au | 1.46173971   | -7.52716177  | 12.72618815 |
| Au | -7.17445237  | -27.47912105 | 12.77705642 |
| Au | -5.76321082  | -24.94864932 | 12.74117099 |

|    |              |              |             |
|----|--------------|--------------|-------------|
| Au | -4.30657031  | -22.47187777 | 12.76431767 |
| Au | -2.86018580  | -19.95065110 | 12.73724496 |
| Au | -1.46927012  | -17.45450380 | 12.76932194 |
| Au | 0.01542031   | -14.97762981 | 12.77104908 |
| Au | 1.42966415   | -12.47921015 | 12.77407660 |
| Au | -1.44557888  | -22.47931492 | 12.76489536 |
| Au | 0.00715965   | -19.98629048 | 12.75669290 |
| Au | 1.41648632   | -17.50508494 | 12.75051939 |
| Au | 2.87616540   | -14.98872894 | 12.75634565 |
| O  | 1.15059989   | -18.58213008 | 15.62728165 |
| O  | -1.51815191  | -20.44727635 | 15.66335996 |
| O  | -4.17453445  | -22.29993059 | 15.43084215 |
| O  | -6.82437905  | -24.14362329 | 15.63330823 |
| O  | -9.47133495  | -25.98485517 | 15.64493936 |
| O  | 0.86226405   | -15.36242942 | 15.62628698 |
| O  | -1.77338104  | -17.22969403 | 15.47268068 |
| O  | -4.43596953  | -19.07072611 | 15.63399373 |
| O  | -7.09463145  | -20.91193130 | 15.67157025 |
| O  | -9.75759626  | -22.75624989 | 15.47660113 |
| O  | 0.58359104   | -12.13748607 | 15.62971668 |
| O  | -2.06412006  | -13.99129762 | 15.65556155 |
| O  | -4.70789493  | -15.85577394 | 15.67614825 |
| O  | -7.36036526  | -17.68762447 | 15.43557369 |
| O  | -10.02719329 | -19.54006365 | 15.64129734 |
| O  | 0.30533482   | -8.89861364  | 15.67498238 |
| O  | -2.34505815  | -10.76220854 | 15.66222627 |
| O  | -4.98735894  | -12.62435789 | 15.55857498 |
| O  | -7.64670554  | -14.46989986 | 15.64406781 |
| O  | -10.28985295 | -16.32130663 | 15.65788429 |
| O  | 0.03072975   | -5.67040558  | 15.56156213 |
| O  | -2.62930535  | -7.54313609  | 15.66986732 |
| O  | -5.28781390  | -9.39783870  | 15.60410389 |
| O  | -7.92426801  | -11.25192516 | 15.64834155 |
| O  | -10.57455310 | -13.09287102 | 15.56756969 |
| O  | -0.25648404  | -2.46397618  | 15.62552478 |
| O  | -2.90857452  | -4.32599580  | 15.54251121 |
| O  | -5.55751279  | -6.17531990  | 15.64714359 |
| O  | -8.22094346  | -8.02124906  | 15.67284204 |
| O  | -6.54869290  | -27.36385734 | 15.55196422 |
| O  | 3.80086812   | -16.73566990 | 15.59774563 |
| Zn | -0.70004561  | -18.77999788 | 15.44814614 |
| Zn | -3.36896628  | -20.59294794 | 15.40003483 |
| Zn | -6.05696272  | -22.45106513 | 15.42800545 |
| Zn | -8.67860844  | -24.30029101 | 15.40330037 |
| Zn | 1.65272650   | -13.67076904 | 15.47927652 |
| Zn | -0.99709932  | -15.51377242 | 15.44580305 |
| Zn | -3.65046841  | -17.38173756 | 15.40837369 |
| Zn | -6.28777246  | -19.24041891 | 15.41128131 |
| Zn | -8.94733268  | -21.05588140 | 15.43815474 |
| Zn | 1.34923794   | -10.43778570 | 15.48262354 |
| Zn | -1.28087766  | -12.29552407 | 15.44749582 |
| Zn | -3.92099476  | -14.16816013 | 15.49170047 |
| Zn | -6.55953272  | -15.97873355 | 15.45006161 |
| Zn | -9.23994543  | -17.85601867 | 15.41849320 |
| Zn | 1.09589474   | -7.21387919  | 15.42419457 |
| Zn | -1.55342236  | -9.06936973  | 15.53986728 |
| Zn | -4.20258997  | -10.92058961 | 15.50829472 |
| Zn | -6.85769083  | -12.78179698 | 15.41657382 |
| Zn | -9.50580707  | -14.63170389 | 15.44437616 |
| Zn | 0.83731463   | -3.97494864  | 15.47001403 |
| Zn | -1.83173986  | -5.86318577  | 15.48106854 |
| Zn | -4.48555506  | -7.70510412  | 15.43552866 |
| Zn | -7.15616066  | -9.54986467  | 15.50858486 |

|    |              |              |             |
|----|--------------|--------------|-------------|
| Zn | -9.77968941  | -11.39424332 | 15.45095456 |
| Zn | -12.43883677 | -13.27403164 | 15.42335272 |
| Zn | -2.11680462  | -2.62528690  | 15.41105305 |
| Zn | -0.45104892  | -21.97177258 | 15.45389278 |
| Zn | -3.08099164  | -23.83832653 | 15.44911398 |
| Zn | -5.74655390  | -25.66773394 | 15.42187614 |
| Zn | -8.42130961  | -27.52151157 | 15.44995166 |
| Zn | 1.93821126   | -16.88736497 | 15.42406981 |

### 31/16 Sn

158

Lattice="-9.1782460198 15.8971884307 0.0 -9.1782460198 -15.8971884307 0.0 0.0 0.0 22.3574735566"

|    |              |              |             |
|----|--------------|--------------|-------------|
| Sn | -13.76736903 | 0.00000000   | 5.50000000  |
| Sn | -11.47280752 | 3.97429711   | 5.50000000  |
| Sn | -9.17824602  | 7.94859422   | 5.50000000  |
| Sn | -6.88368451  | 11.92289132  | 5.50000000  |
| Sn | -11.47280752 | -3.97429711  | 5.50000000  |
| Sn | -9.17824602  | 0.00000000   | 5.50000000  |
| Sn | -6.88368451  | 3.97429711   | 5.50000000  |
| Sn | -4.58912301  | 7.94859422   | 5.50000000  |
| Sn | -9.17824602  | -7.94859422  | 5.50000000  |
| Sn | -6.88368451  | -3.97429711  | 5.50000000  |
| Sn | -4.58912301  | 0.00000000   | 5.50000000  |
| Sn | -2.29456150  | 3.97429711   | 5.50000000  |
| Sn | -6.88368451  | -11.92289132 | 5.50000000  |
| Sn | -4.58912301  | -7.94859422  | 5.50000000  |
| Sn | -2.29456150  | -3.97429711  | 5.50000000  |
| Sn | 0.00000000   | 0.00000000   | 5.50000000  |
| Sn | -11.47224301 | 1.32702034   | 6.58373666  |
| Sn | -9.17925691  | 5.30533196   | 6.58970351  |
| Sn | -6.88170651  | 9.26995725   | 6.55182371  |
| Sn | -13.77229283 | -2.65354143  | 6.58970351  |
| Sn | -9.18048085  | -2.65016983  | 6.58373666  |
| Sn | -6.88201420  | 1.32314950   | 6.58373666  |
| Sn | -4.58813123  | 5.30182995   | 6.55724577  |
| Sn | -11.47245762 | -6.62594092  | 6.60188162  |
| Sn | -6.88178399  | -6.62607099  | 6.55724577  |
| Sn | -4.58318833  | -2.65179052  | 6.58970351  |
| Sn | -2.29290705  | 1.32612493   | 6.60188162  |
| Sn | -9.17824602  | -10.59812562 | 6.63214198  |
| Sn | -13.76937338 | 5.29981599   | 6.60188162  |
| Sn | -11.47674332 | 9.27334825   | 6.55182371  |
| Sn | -9.17628823  | 13.25107136  | 6.55182371  |
| Sn | -16.06482284 | 1.32424104   | 6.55724577  |
| Sn | -11.43270262 | 1.31004385   | 9.46857165  |
| Sn | -9.24364925  | 5.27638358   | 9.47073501  |
| Sn | -6.84954155  | 9.24197814   | 9.41274406  |
| Sn | -13.71502662 | -2.69483265  | 9.47073501  |
| Sn | -9.18554898  | -2.60743861  | 9.46857165  |
| Sn | -6.91648646  | 1.29739476   | 9.46857165  |
| Sn | -4.52119877  | 5.28286365   | 9.43339489  |
| Sn | -11.52526957 | -6.62592917  | 9.48903550  |
| Sn | -6.93167552  | -6.67455304  | 9.43339489  |
| Sn | -4.57606219  | -2.58155093  | 9.47073501  |
| Sn | -2.26651126  | 1.28038256   | 9.48903550  |
| Sn | -9.17824602  | -10.59812562 | 9.51851483  |
| Sn | -13.74295723 | 5.34554661   | 9.48903550  |
| Sn | -11.51705642 | 9.25948214   | 9.41274406  |
| Sn | -9.16814008  | 13.29291659  | 9.41274406  |
| Sn | -16.08186377 | 1.39168940   | 9.43339489  |
| Sn | -13.74425735 | 2.65855715   | 10.40218677 |
| Sn | -11.47319512 | 6.67086217   | 10.57058950 |
| Sn | -9.17824602  | 10.59812562  | 10.24836430 |

|    |              |              |             |
|----|--------------|--------------|-------------|
| Sn | -16.01324654 | -1.28781087  | 10.35283958 |
| Sn | -11.47679428 | -1.31330547  | 10.54263327 |
| Sn | -9.16632779  | 2.64725392   | 10.54263327 |
| Sn | -6.87602269  | 6.56318952   | 10.35283958 |
| Sn | -13.80790758 | -5.32291530  | 10.57058950 |
| Sn | -9.19761839  | -5.28356039  | 10.40218677 |
| Sn | -6.89161599  | -1.33394845  | 10.54263327 |
| Sn | -4.59286232  | 2.62500323   | 10.40218677 |
| Sn | -11.46767509 | -9.26354392  | 10.54746609 |
| Sn | -6.87774983  | -9.28271274  | 10.54746609 |
| Sn | -4.64546883  | -5.27537865  | 10.35283958 |
| Sn | -2.25363537  | -1.34794687  | 10.57058950 |
| Sn | -9.18931315  | -13.24812021 | 10.54746609 |
| Sn | -13.73669694 | 2.80059619   | 13.28024903 |
| Sn | -11.42318777 | 6.65364851   | 13.48425131 |
| Sn | -9.17824602  | 10.59812562  | 13.08650701 |
| Sn | -15.92794833 | -1.50655596  | 13.21061665 |
| Sn | -11.41590497 | -1.36256736  | 13.44077640 |
| Sn | -9.23943449  | 2.61915317   | 13.44077640 |
| Sn | -7.10811059  | 6.59869164   | 13.21061665 |
| Sn | -13.81800378 | -5.27100085  | 13.48425131 |
| Sn | -9.32440801  | -5.34803240  | 13.28024903 |
| Sn | -6.87939860  | -1.25658582  | 13.44077640 |
| Sn | -4.47363311  | 2.54743620   | 13.28024903 |
| Sn | -11.50416597 | -9.39608462  | 13.44244929 |
| Sn | -6.97428800  | -9.18484035  | 13.44244929 |
| Sn | -4.49867914  | -5.09213569  | 13.21061665 |
| Sn | -2.29354650  | -1.38264767  | 13.48425131 |
| Sn | -9.05628409  | -13.21345189 | 13.44244929 |
| Sn | -13.78364426 | 0.08264870   | 14.19473768 |
| Sn | -11.47406975 | 4.00328677   | 14.46968119 |
| Sn | -9.17884563  | 8.10650774   | 14.42014154 |
| Sn | -7.02014183  | 11.84341528  | 14.42014154 |
| Sn | -11.49728219 | -3.98988506  | 14.46968119 |
| Sn | -9.17824602  | 0.00000000   | 14.51317183 |
| Sn | -6.80397102  | 3.94706752   | 14.19473768 |
| Sn | -4.76369579  | 7.82853093   | 14.18199708 |
| Sn | -9.29660016  | -7.91790564  | 14.44634383 |
| Sn | -6.94712278  | -4.02971622  | 14.19473768 |
| Sn | -4.56338611  | -0.01340171  | 14.46968119 |
| Sn | -2.26196152  | 3.85645513   | 14.44634383 |
| Sn | -15.97617638 | 4.06145051   | 14.44634383 |
| Sn | -4.60581447  | -7.73737811  | 14.18199708 |
| Sn | -11.33575060 | 11.84445384  | 14.42014154 |
| Sn | -18.16522779 | -0.09115282  | 14.18199708 |
| O  | -15.40934411 | -2.78370790  | 17.30868239 |
| O  | -14.17766965 | 0.17456815   | 16.47342045 |
| O  | -13.08633500 | 3.23560033   | 17.41706127 |
| O  | -11.78459694 | 6.32455743   | 17.32287114 |
| O  | -10.64998489 | 9.37715644   | 17.20527454 |
| O  | -9.49976691  | 12.48317346  | 17.20527454 |
| O  | -13.35229796 | -5.41944483  | 17.32287114 |
| O  | -12.14034893 | -2.33653169  | 17.39215425 |
| O  | -10.98473198 | 0.69188180   | 17.27226028 |
| O  | -9.72069036  | 3.73352222   | 17.39215425 |
| O  | -8.47345873  | 6.78814319   | 17.30868239 |
| O  | -7.38498626  | 9.93404696   | 17.20527454 |
| O  | -11.25803930 | -8.02292869  | 17.29034945 |
| O  | -10.02631362 | -5.00230450  | 17.41706127 |
| O  | -8.87419026  | -1.91040364  | 17.27226028 |
| O  | -7.67581582  | 1.21852183   | 17.27226028 |
| O  | -6.52735375  | 4.24234379   | 16.47342045 |
| O  | -5.25730707  | 7.45589073   | 16.41591820 |

|    |              |              |             |
|----|--------------|--------------|-------------|
| O  | -9.17824602  | -10.59812562 | 17.27875612 |
| O  | -7.88079104  | -7.49678708  | 17.27628021 |
| O  | -6.82971466  | -4.41691194  | 16.47342045 |
| O  | -5.67369876  | -1.39699053  | 17.39215425 |
| O  | -4.42208944  | 1.76670417   | 17.41706127 |
| O  | -3.33456545  | 4.87202251   | 17.27628021 |
| O  | -16.31938156 | 2.62476457   | 17.27628021 |
| O  | -5.90816342  | -10.08457027 | 17.29034945 |
| O  | -4.68172471  | -7.12357811  | 16.41591820 |
| O  | -3.65193521  | -4.00443529  | 17.30868239 |
| O  | -2.39784315  | -0.90511261  | 17.32287114 |
| O  | -10.36853534 | -13.68687790 | 17.29034945 |
| O  | -17.59570628 | -0.33231263  | 16.41591820 |
| Zn | -13.87787564 | -1.73788331  | 17.09121925 |
| Zn | -12.69191565 | 1.44578205   | 17.08367498 |
| Zn | -11.54250446 | 4.40735701   | 17.19872724 |
| Zn | -10.28894981 | 7.49544790   | 17.17333982 |
| Zn | -9.17824602  | 10.59812562  | 17.15830310 |
| Zn | -8.01531548  | 13.58254451  | 16.81596950 |
| Zn | -11.81299993 | -4.25118637  | 17.19872724 |
| Zn | -10.64528041 | -1.18784564  | 17.22853599 |
| Zn | -9.47343332  | 1.86441187   | 17.22853599 |
| Zn | -8.33348230  | 4.93894030   | 17.09121925 |
| Zn | -7.17512871  | 8.09878878   | 16.81596950 |
| Zn | -15.11414242 | -4.70962165  | 17.17333982 |
| Zn | -9.72042571  | -6.86103814  | 17.15155819 |
| Zn | -8.67349518  | -3.76581818  | 17.08367498 |
| Zn | -7.41602432  | -0.67656623  | 17.22853599 |
| Zn | -6.16932723  | 2.32003614   | 17.08367498 |
| Zn | -5.00008562  | 5.51164957   | 16.71264765 |
| Zn | -12.93891836 | -7.22327884  | 17.09948929 |
| Zn | -7.68610611  | -9.41025589  | 17.22498554 |
| Zn | -6.49409767  | -6.37421783  | 16.71264765 |
| Zn | -5.32338011  | -3.20105699  | 17.09121925 |
| Zn | -4.17923367  | -0.15617063  | 17.19872724 |
| Zn | -2.96532285  | 2.96097768   | 17.15155819 |
| Zn | -10.95304134 | -9.89982941  | 17.22498554 |
| Zn | -14.84898950 | 3.90006046   | 17.15155819 |
| Zn | -13.55345283 | 6.86847721   | 17.09948929 |
| Zn | -12.34429387 | 10.11304356  | 16.81596950 |
| Zn | -2.13164583  | -2.78582625  | 17.17333982 |
| Zn | -1.04236687  | 0.35480164   | 17.09948929 |
| Zn | -8.89559061  | -12.48429156 | 17.22498554 |
| Zn | -16.04055476 | 0.86256826   | 16.71264765 |

### 36/31 Pb

196

Lattice="-12.2506249841 -15.1562177835 0.0 7.0003571337 -18.1874613402 0.0 0.0 0.0 22.5003677483"

|    |              |              |            |
|----|--------------|--------------|------------|
| Pb | -10.50053570 | -18.18746134 | 5.50000000 |
| Pb | -8.75044642  | -15.15621778 | 5.50000000 |
| Pb | -7.00035713  | -12.12497423 | 5.50000000 |
| Pb | -5.25026785  | -9.09373067  | 5.50000000 |
| Pb | -3.50017857  | -6.06248711  | 5.50000000 |
| Pb | -1.75008928  | -3.03124356  | 5.50000000 |
| Pb | 0.00000000   | 0.00000000   | 5.50000000 |
| Pb | -8.75044642  | -21.21870490 | 5.50000000 |
| Pb | -7.00035713  | -18.18746134 | 5.50000000 |
| Pb | -5.25026785  | -15.15621778 | 5.50000000 |
| Pb | -3.50017857  | -12.12497423 | 5.50000000 |
| Pb | -1.75008928  | -9.09373067  | 5.50000000 |
| Pb | -0.00000000  | -6.06248711  | 5.50000000 |
| Pb | -7.00035713  | -24.24994845 | 5.50000000 |
| Pb | -5.25026785  | -21.21870490 | 5.50000000 |

|    |              |              |             |
|----|--------------|--------------|-------------|
| Pb | -3.50017857  | -18.18746134 | 5.50000000  |
| Pb | -1.75008928  | -15.15621778 | 5.50000000  |
| Pb | 0.00000000   | -12.12497423 | 5.50000000  |
| Pb | 1.75008928   | -9.09373067  | 5.50000000  |
| Pb | -5.25026785  | -27.28119201 | 5.50000000  |
| Pb | -3.50017857  | -24.24994845 | 5.50000000  |
| Pb | -1.75008928  | -21.21870490 | 5.50000000  |
| Pb | -0.00000000  | -18.18746134 | 5.50000000  |
| Pb | 1.75008928   | -15.15621778 | 5.50000000  |
| Pb | 3.50017857   | -12.12497423 | 5.50000000  |
| Pb | -3.50017857  | -30.31243557 | 5.50000000  |
| Pb | -1.75008928  | -27.28119201 | 5.50000000  |
| Pb | -0.00000000  | -24.24994846 | 5.50000000  |
| Pb | 1.75008928   | -21.21870490 | 5.50000000  |
| Pb | 3.50017857   | -18.18746134 | 5.50000000  |
| Pb | 5.25026785   | -15.15621778 | 5.50000000  |
| Pb | -8.77667466  | -17.16859827 | 8.28855483  |
| Pb | -7.00650406  | -14.14133488 | 8.28047276  |
| Pb | -5.23397875  | -11.12446243 | 8.28518778  |
| Pb | -3.48155828  | -8.09156950  | 8.29727454  |
| Pb | -1.76116345  | -5.06172103  | 8.30464680  |
| Pb | -0.02016290  | -2.00960912  | 8.30684905  |
| Pb | -10.51167027 | -14.12398990 | 8.28441455  |
| Pb | -7.02346160  | -20.20833459 | 8.28967948  |
| Pb | -5.26926900  | -17.18391045 | 8.28942948  |
| Pb | -3.49587571  | -14.16951612 | 8.29022632  |
| Pb | -1.73311571  | -11.13399031 | 8.28472342  |
| Pb | 0.00811647   | -8.09492934  | 8.28774163  |
| Pb | 1.72566038   | -5.04866980  | 8.29466628  |
| Pb | -5.24895156  | -23.22446970 | 8.29474794  |
| Pb | -3.50784241  | -20.21016852 | 8.30873502  |
| Pb | -1.75084726  | -17.20024768 | 8.31348639  |
| Pb | 0.01424175   | -14.17571132 | 8.30024512  |
| Pb | 1.75861455   | -11.12764947 | 8.28322322  |
| Pb | -8.75646276  | -23.23800162 | 8.28288072  |
| Pb | -3.48696226  | -26.24373127 | 8.29173397  |
| Pb | -1.74233509  | -23.21958998 | 8.31144374  |
| Pb | 0.00258783   | -20.20869060 | 8.32144793  |
| Pb | 1.75742024   | -17.18703765 | 8.31060252  |
| Pb | 3.51428417   | -14.14677173 | 8.30050044  |
| Pb | -6.99673140  | -26.25988621 | 8.28742549  |
| Pb | -8.73635365  | -11.09098205 | 8.28248619  |
| Pb | 0.02377601   | -26.25640074 | 8.29195253  |
| Pb | 1.75932787   | -23.23421439 | 8.29963852  |
| Pb | 3.49707059   | -20.20873038 | 8.31910007  |
| Pb | 5.24599332   | -17.16339715 | 8.30847863  |
| Pb | -5.24066711  | -29.27562607 | 8.28772400  |
| Pb | -10.53520399 | -16.11769237 | 11.14989632 |
| Pb | -8.74736289  | -13.09894173 | 11.12862697 |
| Pb | -6.95599035  | -10.08474480 | 11.14425869 |
| Pb | -5.20187238  | -7.06823755  | 11.18211217 |
| Pb | 3.50751607   | -22.21958778 | 11.22731400 |
| Pb | 5.22146869   | -19.16408910 | 11.21652488 |
| Pb | -5.26050177  | -31.26990429 | 11.16023332 |
| Pb | -8.78724019  | -19.18167565 | 11.15606137 |
| Pb | -7.02916252  | -16.16803829 | 11.13947192 |
| Pb | -5.24584279  | -13.15742787 | 11.13570046 |
| Pb | -3.46902741  | -10.13579663 | 11.15221074 |
| Pb | -1.73065632  | -7.08068847  | 11.18814053 |
| Pb | -0.02694215  | -4.01738271  | 11.18657737 |
| Pb | -7.02256231  | -22.22738221 | 11.16580511 |
| Pb | -5.28356607  | -19.21857410 | 11.16650146 |
| Pb | -3.52038787  | -16.21235637 | 11.16052991 |



|    |              |              |             |
|----|--------------|--------------|-------------|
| Pb | -1.74229056  | -13.18652942 | 11.15269382 |
| Pb | 0.01276917   | -10.12962345 | 11.16180874 |
| Pb | 1.73737557   | -7.06844535  | 11.17212513 |
| Pb | -5.23867884  | -25.23158072 | 11.16720883 |
| Pb | -3.49355800  | -22.23020159 | 11.20929374 |
| Pb | -1.76057240  | -19.23406417 | 11.21986749 |
| Pb | -0.00360251  | -16.20962523 | 11.20632754 |
| Pb | 1.75148974   | -13.15396817 | 11.17773641 |
| Pb | 3.49657438   | -10.10344209 | 11.16168596 |
| Pb | -3.47900199  | -28.24809365 | 11.14728047 |
| Pb | -1.70457404  | -25.23596459 | 11.17339449 |
| Pb | 0.03080624   | -22.23133629 | 11.22590898 |
| Pb | 1.74144777   | -19.20555395 | 11.23597706 |
| Pb | 3.48822704   | -16.15906551 | 11.20770216 |
| Pb | -6.99739088  | -28.25792313 | 11.18060848 |
| Pb | -10.56648770 | -18.04552456 | 13.98059634 |
| Pb | -8.80262712  | -15.05079164 | 13.96163086 |
| Pb | -6.95025004  | -12.13139787 | 13.96274525 |
| Pb | -5.11184747  | -9.16783150  | 13.98832868 |
| Pb | -3.36727288  | -6.08151097  | 14.01419201 |
| Pb | -1.74246680  | -2.90349808  | 14.03023301 |
| Pb | -5.27594698  | -33.16008538 | 14.00037385 |
| Pb | -8.78596958  | -21.16850315 | 13.97348120 |
| Pb | -7.11831384  | -18.15225880 | 13.97823988 |
| Pb | -5.34008387  | -15.21133571 | 13.96863614 |
| Pb | -3.50312110  | -12.23763008 | 13.97049637 |
| Pb | -1.68749250  | -9.17456806  | 13.98488576 |
| Pb | 0.03794874   | -6.01292426  | 13.99010103 |
| Pb | -7.00937206  | -24.24486039 | 13.96356533 |
| Pb | -5.30746035  | -21.26528850 | 13.98873905 |
| Pb | -3.64043130  | -18.27657885 | 14.00263153 |
| Pb | -1.86908029  | -15.27617566 | 13.99695465 |
| Pb | -0.04314965  | -12.20917037 | 13.97618803 |
| Pb | 1.75577686   | -9.09053144  | 13.96697750 |
| Pb | -5.19307501  | -27.22618256 | 13.97193656 |
| Pb | -3.42119513  | -24.29383315 | 13.99072237 |
| Pb | -1.74523456  | -21.31542954 | 14.03825649 |
| Pb | -0.09759560  | -18.26197099 | 14.04669398 |
| Pb | 1.66217092   | -15.16908045 | 14.01557393 |
| Pb | 3.47292080   | -12.09925308 | 13.97335647 |
| Pb | -3.45061936  | -30.20031005 | 13.97045229 |
| Pb | -1.61589903  | -27.28296366 | 13.97426018 |
| Pb | 0.14726524   | -24.32369717 | 14.01947891 |
| Pb | 1.78030378   | -21.24231326 | 14.04958885 |
| Pb | 3.44176883   | -18.10428338 | 14.04123726 |
| Pb | 5.23929162   | -15.03982781 | 14.00630500 |
| O  | -4.25856595  | -26.87971503 | 17.21384066 |
| O  | -2.22608763  | -24.32544546 | 17.25389744 |
| O  | -5.40334472  | -23.82195696 | 17.25625663 |
| O  | -0.16115977  | -21.79156171 | 17.38855642 |
| O  | -3.33928977  | -21.27678697 | 17.30360900 |
| O  | -6.53251764  | -20.78787616 | 17.25076947 |
| O  | 1.90649555   | -19.28433542 | 17.45553971 |
| O  | -1.27865701  | -18.74356268 | 17.33026431 |
| O  | -4.47190817  | -18.24440441 | 17.20494205 |
| O  | -7.68682415  | -17.77429720 | 17.17634627 |
| O  | 3.95343247   | -16.79283662 | 17.33860946 |
| O  | 0.76050281   | -16.23075466 | 17.33068044 |
| O  | -2.43995397  | -15.70444373 | 17.17807151 |
| O  | -5.65563612  | -15.22280672 | 17.12861552 |
| O  | -8.88031318  | -14.76311000 | 17.10695911 |
| O  | -6.27457189  | -29.42845879 | 17.23229412 |
| O  | 2.78811266   | -13.73040903 | 17.27831566 |

|    |              |              |             |
|----|--------------|--------------|-------------|
| O  | -0.41969624  | -13.18365954 | 17.22162241 |
| O  | -3.63976967  | -12.67574050 | 17.14292971 |
| O  | -6.86406515  | -12.20518934 | 17.09214488 |
| O  | -3.07885469  | -29.92486964 | 17.13782986 |
| O  | -7.43792492  | -26.36455771 | 17.24345433 |
| O  | 1.60894010   | -10.68306624 | 17.25120029 |
| O  | -1.62184285  | -10.15489503 | 17.22381243 |
| O  | -4.85256530  | -9.65461502  | 17.15357782 |
| O  | -1.06742072  | -27.36688523 | 17.15046348 |
| O  | -8.59881459  | -23.32312588 | 17.24033642 |
| O  | 0.42803473   | -7.66026530  | 17.26232583 |
| O  | -2.81243679  | -7.13864074  | 17.25334981 |
| O  | 0.96387624   | -24.82222252 | 17.22088561 |
| O  | -9.74967362  | -20.30732664 | 17.23994802 |
| O  | -0.73383315  | -4.65303350  | 17.28685597 |
| O  | 3.03700120   | -22.31727510 | 17.38039187 |
| O  | -10.91464451 | -17.30359514 | 17.18291053 |
| O  | 5.11328213   | -19.83141395 | 17.32187456 |
| O  | -5.09825371  | -32.47420435 | 17.17339064 |
| Zn | -5.69801216  | -25.66872647 | 17.19035813 |
| Zn | -3.66709656  | -23.11661324 | 17.21755583 |
| Zn | -6.85704101  | -22.63485110 | 17.19786622 |
| Zn | -1.59432538  | -20.58733966 | 17.29673984 |
| Zn | -4.78996965  | -20.09513067 | 17.20529049 |
| Zn | -8.00495777  | -19.62993534 | 17.18139502 |
| Zn | 0.48004118   | -18.08354105 | 17.33193115 |
| Zn | -2.71924566  | -17.56068289 | 17.18254539 |
| Zn | -5.94017052  | -17.08371490 | 17.13178742 |
| Zn | -9.16949599  | -16.62706508 | 17.11288507 |
| Zn | 2.52453556   | -15.58707953 | 17.27089619 |
| Zn | -0.67576272  | -15.04132020 | 17.19018441 |
| Zn | -3.90247123  | -14.53428465 | 17.10802249 |
| Zn | -7.13574129  | -14.06589140 | 17.07646814 |
| Zn | -10.35790306 | -13.59875570 | 17.09684293 |
| Zn | 4.54000090   | -13.06172065 | 17.20065173 |
| Zn | 1.34791889   | -12.53898893 | 17.20165888 |
| Zn | -1.87750874  | -12.01056527 | 17.15864920 |
| Zn | -5.11355737  | -11.51175954 | 17.08996485 |
| Zn | -8.33959171  | -11.03440302 | 17.08651289 |
| Zn | -4.53638099  | -28.73246015 | 17.15674864 |
| Zn | 3.36410116   | -10.01927894 | 17.19547960 |
| Zn | 0.14637955   | -9.51481157  | 17.20180659 |
| Zn | -3.09260732  | -8.98964626  | 17.17006841 |
| Zn | -6.32635747  | -8.48132611  | 17.12470950 |
| Zn | -2.52429484  | -26.16963163 | 17.16194030 |
| Zn | 2.18190921   | -7.00361614  | 17.19818779 |
| Zn | -1.04839357  | -6.50311482  | 17.21525279 |
| Zn | -4.28433144  | -5.96762195  | 17.22900968 |
| Zn | -0.48895806  | -23.62429905 | 17.23811677 |
| Zn | 1.01638522   | -4.00502499  | 17.18537013 |
| Zn | -2.20879627  | -3.49573829  | 17.28536067 |
| Zn | 1.58943647   | -21.12729091 | 17.37201138 |
| Zn | -0.14212651  | -0.99270110  | 17.17377886 |
| Zn | 3.66147151   | -18.64902228 | 17.32987724 |
| Zn | 5.69762740   | -16.13116011 | 17.19637696 |

## Wurtzite ZnO(10-10) on metals

### 20/27 Ru

148

Lattice="-12.195 -11.7346442213 0.0 0.0 -14.0815730655 0.0 0.0 0.0 20.6581941874"

|    |              |              |            |
|----|--------------|--------------|------------|
| Ru | -10.84000000 | -12.51695384 | 5.50000000 |
| Ru | -9.48500000  | -10.17002499 | 5.50000000 |
| Ru | -8.13000000  | -7.82309615  | 5.50000000 |
| Ru | -6.77500000  | -19.55774037 | 5.50000000 |
| Ru | -10.84000000 | -17.21081152 | 5.50000000 |
| Ru | -9.48500000  | -14.86388268 | 5.50000000 |
| Ru | -8.13000000  | -12.51695384 | 5.50000000 |
| Ru | -6.77500000  | -10.17002499 | 5.50000000 |
| Ru | -5.42000000  | -7.82309615  | 5.50000000 |
| Ru | -4.06500000  | -5.47616730  | 5.50000000 |
| Ru | -2.71000000  | -3.12923846  | 5.50000000 |
| Ru | -1.35500000  | -14.86388268 | 5.50000000 |
| Ru | 0.00000000   | -12.51695384 | 5.50000000 |
| Ru | -10.84000000 | -21.90466921 | 5.50000000 |
| Ru | -9.48500000  | -19.55774037 | 5.50000000 |
| Ru | -8.13000000  | -17.21081153 | 5.50000000 |
| Ru | -6.77500000  | -14.86388268 | 5.50000000 |
| Ru | -5.42000000  | -12.51695384 | 5.50000000 |
| Ru | -4.06500000  | -10.17002499 | 5.50000000 |
| Ru | -2.71000000  | -7.82309615  | 5.50000000 |
| Ru | -1.35500000  | -5.47616730  | 5.50000000 |
| Ru | 0.00000000   | -3.12923846  | 5.50000000 |
| Ru | -5.42000000  | -17.21081152 | 5.50000000 |
| Ru | -4.06500000  | -14.86388268 | 5.50000000 |
| Ru | -2.71000000  | -12.51695384 | 5.50000000 |
| Ru | -1.35500000  | -10.17002499 | 5.50000000 |
| Ru | 0.00000000   | -7.82309615  | 5.50000000 |
| Ru | -10.84464936 | -14.07534824 | 7.54202031 |
| Ru | -9.49214302  | -11.73053562 | 7.56963035 |
| Ru | -8.11548247  | -9.38452387  | 7.57211731 |
| Ru | -6.77088534  | -7.04850688  | 7.57812221 |
| Ru | -10.81885047 | -18.78877420 | 7.54627331 |
| Ru | -9.46726588  | -16.41748524 | 7.53539780 |
| Ru | -8.14020797  | -14.06932194 | 7.56016869 |
| Ru | -6.77530582  | -11.72791938 | 7.56737695 |
| Ru | -5.42626954  | -9.38952902  | 7.57299413 |
| Ru | -4.06138995  | -7.04971522  | 7.57564356 |
| Ru | -2.72975605  | -4.71169777  | 7.55449875 |
| Ru | -1.36384445  | -2.34623561  | 7.54999159 |
| Ru | -12.19485638 | -11.74322081 | 7.54898848 |
| Ru | -10.83274249 | -23.47084793 | 7.56008875 |
| Ru | -9.45797156  | -21.12765605 | 7.56734651 |
| Ru | -8.12027142  | -18.77910449 | 7.55380517 |
| Ru | -6.77714671  | -16.43410141 | 7.56376375 |
| Ru | -5.42974970  | -14.07587200 | 7.55567371 |
| Ru | -4.07788938  | -11.73611219 | 7.55575724 |
| Ru | -2.70754334  | -9.38885176  | 7.56157384 |
| Ru | -1.35550565  | -7.05743910  | 7.53975733 |
| Ru | -0.00331412  | -4.69414791  | 7.53224832 |
| Ru | -5.41891290  | -18.78756904 | 7.57330386 |
| Ru | -4.08418560  | -16.44431672 | 7.55568565 |
| Ru | -2.71374281  | -14.08736257 | 7.55645457 |
| Ru | -1.34586995  | -11.74178604 | 7.55581459 |
| Ru | -12.17947445 | -21.12694343 | 7.54753450 |
| Ru | -10.85923755 | -12.51837743 | 9.70094860 |
| Ru | -9.47674134  | -10.15919063 | 9.69911148 |
| Ru | -8.11116844  | -7.82685973  | 9.74417505 |
| Ru | -6.76310321  | -19.56190885 | 9.73031047 |

|    |              |              |             |
|----|--------------|--------------|-------------|
| Ru | -10.82416968 | -17.19787694 | 9.58612000  |
| Ru | -9.50011183  | -14.85376215 | 9.67588695  |
| Ru | -8.14680524  | -12.49574508 | 9.68882395  |
| Ru | -6.77735736  | -10.17978114 | 9.73701781  |
| Ru | -5.41025153  | -7.83137719  | 9.73031105  |
| Ru | -4.07368405  | -5.50429949  | 9.71376206  |
| Ru | -2.71813545  | -3.14463074  | 9.68191385  |
| Ru | -1.35780310  | -14.87248576 | 9.65926943  |
| Ru | -12.18034717 | -24.25835702 | 9.68474861  |
| Ru | -10.80739435 | -21.90175348 | 9.68403660  |
| Ru | -9.45129328  | -19.55542004 | 9.68855922  |
| Ru | -8.11881507  | -17.20512770 | 9.69607434  |
| Ru | -6.80111806  | -14.85546813 | 9.65865386  |
| Ru | -5.42255387  | -12.51174924 | 9.71415159  |
| Ru | -4.06823945  | -10.17420750 | 9.68402569  |
| Ru | -2.69992115  | -7.83369248  | 9.69540206  |
| Ru | -1.34767867  | -5.49998689  | 9.63309965  |
| Ru | -0.01135259  | -3.12966381  | 9.62829357  |
| Ru | -5.43568212  | -17.22669789 | 9.69907733  |
| Ru | -4.06989624  | -14.86392031 | 9.67668244  |
| Ru | -2.71429835  | -12.52303296 | 9.65821572  |
| Ru | -1.33084868  | -10.16149915 | 9.65137924  |
| Ru | -12.16735151 | -19.56551879 | 9.64928566  |
| Ru | -10.91513392 | -14.10380089 | 11.76215036 |
| Ru | -9.56663419  | -11.74773053 | 11.75307817 |
| Ru | -8.13066878  | -9.38480481  | 11.82161276 |
| Ru | -6.74673063  | -7.04725865  | 11.80088564 |
| Ru | -10.79405816 | -18.67717131 | 11.68535137 |
| Ru | -9.51270815  | -16.40930152 | 11.69036686 |
| Ru | -8.23098669  | -14.05515813 | 11.69871162 |
| Ru | -6.78842634  | -11.79739176 | 11.81209666 |
| Ru | -5.42104536  | -9.42063860  | 11.77033101 |
| Ru | -3.98143490  | -7.11324071  | 11.80977799 |
| Ru | -2.64466582  | -4.73685637  | 11.70878882 |
| Ru | -1.37929193  | -2.44040779  | 11.69980732 |
| Ru | -0.06040834  | -14.03118175 | 11.77608458 |
| Ru | -10.86063369 | -23.48493116 | 11.73894622 |
| Ru | -9.47509538  | -21.03881805 | 11.79789481 |
| Ru | -8.10474897  | -18.73250044 | 11.74982345 |
| Ru | -6.77367165  | -16.36117151 | 11.76620416 |
| Ru | -5.44467012  | -14.08852486 | 11.72275749 |
| Ru | -4.08837167  | -11.74852024 | 11.72270913 |
| Ru | -2.64007612  | -9.44688380  | 11.74234368 |
| Ru | -1.29567163  | -7.06206925  | 11.69245987 |
| Ru | -12.19092011 | -16.47776929 | 11.62017378 |
| Ru | -5.35361309  | -18.78062506 | 11.81882180 |
| Ru | -4.03967001  | -16.43620797 | 11.70714177 |
| Ru | -2.74397989  | -14.13839524 | 11.70869373 |
| Ru | -1.29668451  | -11.67177365 | 11.69079801 |
| Ru | -12.15755283 | -21.11056513 | 11.70322839 |
| O  | -9.69920424  | -20.54461847 | 13.98165871 |
| O  | -0.61160256  | -8.13052531  | 15.04474989 |
| O  | -5.94339894  | -15.54698433 | 13.84713316 |
| O  | -8.91234001  | -14.95490976 | 14.95892269 |
| O  | -10.87375607 | -17.44398523 | 13.83040071 |
| O  | -1.74982220  | -5.01214681  | 14.94501098 |
| O  | -2.27488021  | -10.52590052 | 13.79928173 |
| O  | -5.27210146  | -9.96456002  | 15.13442360 |
| O  | -6.95319733  | -12.37794270 | 14.03082842 |
| O  | -10.06370035 | -11.87122524 | 15.01854907 |
| O  | -11.88524271 | -14.31754449 | 13.90839026 |
| O  | -2.89351839  | -16.09588457 | 14.92195353 |
| O  | -3.62774074  | -7.41752308  | 14.00244686 |

|    |              |              |             |
|----|--------------|--------------|-------------|
| O  | -6.67509432  | -6.95854647  | 15.04196288 |
| O  | -8.32073669  | -9.38289321  | 14.01900199 |
| O  | -11.49335678 | -22.93675623 | 15.07797800 |
| O  | -4.85099301  | -18.52655579 | 13.99340344 |
| O  | -7.92586112  | -18.04268515 | 14.99174411 |
| O  | -0.85143259  | -13.70090922 | 13.88537834 |
| O  | -3.96405592  | -13.08693397 | 14.94905776 |
| Zn | -11.25636538 | -19.38443886 | 14.12004506 |
| Zn | -0.61010680  | -9.96071053  | 14.57308071 |
| Zn | -7.34320831  | -14.26682169 | 14.20154983 |
| Zn | -9.14073865  | -16.73730324 | 14.39219915 |
| Zn | -0.14662350  | -4.44174240  | 14.19644047 |
| Zn | -1.86457777  | -6.83242099  | 14.47078055 |
| Zn | -3.86502169  | -9.35200237  | 14.06051199 |
| Zn | -5.22928158  | -11.76595331 | 14.59684676 |
| Zn | -8.49894454  | -11.27431600 | 14.19646772 |
| Zn | -10.12556558 | -13.63362586 | 14.36079577 |
| Zn | -1.26807541  | -1.46046167  | 14.20210175 |
| Zn | -3.03910144  | -3.78063675  | 14.26719218 |
| Zn | -5.15676047  | -6.30963552  | 14.19487044 |
| Zn | -6.60746536  | -8.77366161  | 14.57842265 |
| Zn | -9.96176775  | -22.44043637 | 14.10446533 |
| Zn | -11.39344397 | -24.72907664 | 14.52085547 |
| Zn | -6.35745296  | -17.40157457 | 14.22608330 |
| Zn | -8.00351757  | -19.84935681 | 14.48169948 |
| Zn | -2.49721240  | -12.53917023 | 13.89530403 |
| Zn | -4.10173598  | -14.83233741 | 14.16696637 |

## 28/36 Pd

200

Lattice="-16.5038722729 -14.2927726491 0.0 5.5012907576 -9.5285150994 0.0 0.0 0.0 20.9758718289"

|    |              |              |            |
|----|--------------|--------------|------------|
| Pd | -13.75322689 | -14.29277265 | 5.50000000 |
| Pd | -12.37790421 | -11.91064387 | 5.50000000 |
| Pd | -11.00258152 | -9.52851510  | 5.50000000 |
| Pd | -12.37790420 | -16.67490142 | 5.50000000 |
| Pd | -11.00258152 | -14.29277265 | 5.50000000 |
| Pd | -9.62725883  | -11.91064387 | 5.50000000 |
| Pd | -8.25193614  | -9.52851510  | 5.50000000 |
| Pd | -6.87661345  | -7.14638632  | 5.50000000 |
| Pd | -5.50129076  | -4.76425755  | 5.50000000 |
| Pd | -11.00258152 | -19.05703020 | 5.50000000 |
| Pd | -9.62725883  | -16.67490142 | 5.50000000 |
| Pd | -8.25193614  | -14.29277265 | 5.50000000 |
| Pd | -6.87661345  | -11.91064388 | 5.50000000 |
| Pd | -5.50129076  | -9.52851510  | 5.50000000 |
| Pd | -4.12596807  | -7.14638632  | 5.50000000 |
| Pd | -2.75064538  | -4.76425755  | 5.50000000 |
| Pd | -1.37532269  | -2.38212877  | 5.50000000 |
| Pd | 0.00000000   | 0.00000000   | 5.50000000 |
| Pd | -9.62725883  | -21.43915897 | 5.50000000 |
| Pd | -8.25193614  | -19.05703020 | 5.50000000 |
| Pd | -6.87661345  | -16.67490142 | 5.50000000 |
| Pd | -5.50129076  | -14.29277265 | 5.50000000 |
| Pd | -4.12596807  | -11.91064387 | 5.50000000 |
| Pd | -2.75064538  | -9.52851510  | 5.50000000 |
| Pd | -1.37532269  | -7.14638632  | 5.50000000 |
| Pd | -0.00000000  | -4.76425755  | 5.50000000 |
| Pd | 1.37532269   | -2.38212877  | 5.50000000 |
| Pd | -4.12596807  | -16.67490142 | 5.50000000 |
| Pd | -2.75064538  | -14.29277265 | 5.50000000 |
| Pd | -1.37532269  | -11.91064387 | 5.50000000 |
| Pd | 0.00000000   | -9.52851510  | 5.50000000 |
| Pd | 1.37532269   | -7.14638632  | 5.50000000 |

|    |              |              |             |
|----|--------------|--------------|-------------|
| Pd | 2.75064538   | -4.76425755  | 5.50000000  |
| Pd | 1.37532269   | -11.91064387 | 5.50000000  |
| Pd | 2.75064538   | -9.52851510  | 5.50000000  |
| Pd | 4.12596807   | -7.14638632  | 5.50000000  |
| Pd | -12.37279411 | -13.49503222 | 7.78607742  |
| Pd | -11.00637936 | -11.11465659 | 7.79350849  |
| Pd | -9.63871030  | -8.71906260  | 7.77872111  |
| Pd | -11.00965772 | -15.88359920 | 7.77519856  |
| Pd | -9.63454941  | -13.49502980 | 7.78345619  |
| Pd | -8.26227605  | -11.09902457 | 7.78520531  |
| Pd | -6.88950307  | -8.72818219  | 7.80338101  |
| Pd | -5.51755642  | -6.34468430  | 7.78072166  |
| Pd | -4.14249169  | -3.96227238  | 7.77898957  |
| Pd | -9.62509629  | -18.25929002 | 7.78396658  |
| Pd | -8.26411985  | -15.88239085 | 7.77625814  |
| Pd | -6.89092160  | -13.47997331 | 7.76604965  |
| Pd | -5.51923772  | -11.09835048 | 7.78974280  |
| Pd | -4.14359920  | -8.72028733  | 7.77819502  |
| Pd | -2.76240641  | -6.34538967  | 7.77526807  |
| Pd | -1.39049751  | -3.96093265  | 7.77508408  |
| Pd | -0.00596404  | -1.58362622  | 7.77288615  |
| Pd | -15.13059017 | -13.49138612 | 7.77478235  |
| Pd | -8.24398666  | -20.64207585 | 7.77483719  |
| Pd | -6.88587906  | -18.26087761 | 7.79387611  |
| Pd | -5.51291697  | -15.87150111 | 7.76455038  |
| Pd | -4.14334994  | -13.48285623 | 7.77253818  |
| Pd | -2.77169386  | -11.10074286 | 7.77660325  |
| Pd | -1.38688727  | -8.72411121  | 7.77865747  |
| Pd | -0.01193661  | -6.34289843  | 7.77608222  |
| Pd | 1.36844360   | -3.96313500  | 7.77636753  |
| Pd | -13.76029927 | -15.87540193 | 7.77661389  |
| Pd | -2.75820275  | -15.87399201 | 7.77928254  |
| Pd | -1.39497058  | -13.48699174 | 7.77760598  |
| Pd | -0.01305947  | -11.10909862 | 7.77731716  |
| Pd | 1.36329796   | -8.72760640  | 7.77429823  |
| Pd | 2.74404944   | -6.34877661  | 7.77288142  |
| Pd | -12.38196797 | -18.26109854 | 7.77725928  |
| Pd | 2.73711079   | -11.10822344 | 7.77774533  |
| Pd | 4.11973071   | -8.72738962  | 7.77550582  |
| Pd | -11.00641014 | -20.63945416 | 7.77528556  |
| Pd | -13.75460269 | -12.70489877 | 10.01595288 |
| Pd | -6.90069615  | -19.86598746 | 10.05049476 |
| Pd | -5.52104416  | -17.42970832 | 10.02208774 |
| Pd | -12.39532035 | -15.08608297 | 10.02189627 |
| Pd | -10.99988968 | -12.69111103 | 10.06024846 |
| Pd | -9.64731974  | -10.28623928 | 10.02234583 |
| Pd | -8.26025507  | -7.91278694  | 10.04185025 |
| Pd | -1.39656056  | -15.07046248 | 10.02345677 |
| Pd | -0.01473256  | -12.68848881 | 10.02429774 |
| Pd | -11.01411215 | -17.47345994 | 10.02350319 |
| Pd | -9.67653899  | -15.11503205 | 10.01336029 |
| Pd | -8.27846029  | -12.65590634 | 10.01043016 |
| Pd | -6.90324741  | -10.31475468 | 10.07983262 |
| Pd | -5.53203486  | -7.91570763  | 10.04437948 |
| Pd | -4.15131274  | -5.54312271  | 10.01128684 |
| Pd | -2.77623978  | -3.15868565  | 10.02120592 |
| Pd | 4.10595117   | -10.31879405 | 10.00908200 |
| Pd | -11.01730102 | -22.22728332 | 10.01510799 |
| Pd | -9.63082649  | -19.84956152 | 10.01087465 |
| Pd | -8.25585223  | -17.45332793 | 10.06092378 |
| Pd | -6.89611185  | -15.06802552 | 9.97354601  |
| Pd | -5.51746097  | -12.66778766 | 10.02218953 |
| Pd | -4.15761626  | -10.29640755 | 10.02639528 |

|    |              |              |             |
|----|--------------|--------------|-------------|
| Pd | -2.76515057  | -7.92110491  | 10.02305272 |
| Pd | -1.40276915  | -5.55513522  | 10.01633707 |
| Pd | -0.00967501  | -3.17123755  | 10.01751598 |
| Pd | -15.15388656 | -15.10037992 | 10.01498916 |
| Pd | -4.13658257  | -15.06574276 | 9.99819432  |
| Pd | -2.78287838  | -12.67153287 | 10.02249479 |
| Pd | -1.40532812  | -10.30812673 | 10.01193160 |
| Pd | -0.02540374  | -7.92438698  | 10.01874455 |
| Pd | 1.35605868   | -5.55515054  | 10.01125721 |
| Pd | -13.76795473 | -17.46453736 | 10.02100332 |
| Pd | 1.34594044   | -10.32170223 | 10.01944786 |
| Pd | 2.73955690   | -7.93781960  | 10.01632169 |
| Pd | -12.40289211 | -19.86784244 | 10.01515362 |
| Pd | -13.80106036 | -14.31725353 | 12.25522621 |
| Pd | -12.42137038 | -11.92026675 | 12.35729375 |
| Pd | -5.56130006  | -18.99213772 | 12.26015939 |
| Pd | -12.40033763 | -16.67845278 | 12.31081918 |
| Pd | -11.03997324 | -14.29881575 | 12.33441006 |
| Pd | -9.66491882  | -11.82563933 | 12.33755354 |
| Pd | -8.28832661  | -9.46227891  | 12.32421074 |
| Pd | -6.91001957  | -7.09206312  | 12.35623115 |
| Pd | -5.53084707  | -4.74325691  | 12.29120546 |
| Pd | -11.04847385 | -19.08641749 | 12.24557137 |
| Pd | -9.68508000  | -16.68283798 | 12.36658766 |
| Pd | -8.33490101  | -14.26224227 | 12.14814329 |
| Pd | -6.90814069  | -11.89736711 | 12.35025969 |
| Pd | -5.54236678  | -9.47315913  | 12.32828186 |
| Pd | -4.14467738  | -7.12015119  | 12.29257819 |
| Pd | -2.78877848  | -4.73729526  | 12.28135313 |
| Pd | -1.38999113  | -2.38300524  | 12.28076729 |
| Pd | -0.03328911  | 0.00152863   | 12.28448419 |
| Pd | -9.64373227  | -21.44308226 | 12.28188137 |
| Pd | -8.28865458  | -19.05794611 | 12.33088957 |
| Pd | -6.90763049  | -16.60444565 | 12.32472527 |
| Pd | -5.51435237  | -14.27147559 | 12.21343480 |
| Pd | -4.14885019  | -11.84562604 | 12.33471175 |
| Pd | -2.78440257  | -9.50419893  | 12.28673269 |
| Pd | -1.40567407  | -7.12516127  | 12.33367083 |
| Pd | -0.03489031  | -4.77457194  | 12.27007530 |
| Pd | 1.35163569   | -2.39463392  | 12.33153663 |
| Pd | -4.15267473  | -16.63702079 | 12.31384816 |
| Pd | -2.78552843  | -14.24353811 | 12.28596337 |
| Pd | -1.39585347  | -11.89004416 | 12.28993674 |
| Pd | -0.03850327  | -9.50193301  | 12.28079569 |
| Pd | 1.35813934   | -7.14855050  | 12.28064342 |
| Pd | 2.72017732   | -4.76289680  | 12.29200977 |
| Pd | 1.34272019   | -11.88764926 | 12.33745840 |
| Pd | 2.71506697   | -9.54066334  | 12.27407526 |
| Pd | 4.09381083   | -7.15953703  | 12.32758349 |
| O  | -12.45788439 | -15.43498703 | 15.42051094 |
| O  | -9.55314830  | -14.20399593 | 15.50925066 |
| O  | -9.65380412  | -11.26463909 | 14.54544710 |
| O  | -6.84831001  | -9.90214942  | 15.57294794 |
| O  | -6.88891519  | -6.85361722  | 14.53680262 |
| O  | -4.15192192  | -5.41860548  | 15.34905251 |
| O  | -9.66986064  | -17.14645007 | 14.56460959 |
| O  | -6.86231211  | -16.00616546 | 14.52532637 |
| O  | -6.86670726  | -12.88126230 | 14.56359967 |
| O  | -4.12459843  | -11.60128425 | 14.52812111 |
| O  | -4.13684498  | -8.51756156  | 15.34128783 |
| O  | -1.42049629  | -7.09138719  | 14.50669302 |
| O  | -1.42004306  | -3.98166510  | 15.32992360 |
| O  | 1.31617918   | -2.52790658  | 14.51688054 |

|    |              |              |             |
|----|--------------|--------------|-------------|
| O  | -15.20183985 | -13.76688858 | 15.32698489 |
| O  | -12.40619829 | -12.41559389 | 14.54340338 |
| O  | -6.88553200  | -18.99278263 | 15.46625147 |
| O  | -4.10684114  | -17.75567143 | 15.28994046 |
| O  | -4.15660413  | -14.66847073 | 15.44831984 |
| O  | -1.40382002  | -13.30111107 | 15.33601414 |
| O  | -1.40148469  | -10.18206311 | 15.34648099 |
| O  | 1.32354450   | -8.74683968  | 15.34849465 |
| O  | 1.29597038   | -5.63843719  | 15.32811898 |
| O  | -12.44231227 | -18.51435807 | 15.35434464 |
| O  | 1.32157862   | -11.86263442 | 14.51361183 |
| O  | 4.03827430   | -10.40411445 | 15.33474965 |
| O  | 4.04815222   | -7.29284736  | 14.50828133 |
| O  | -9.71746764  | -20.21788446 | 15.31377095 |
| Zn | -10.67773028 | -15.62065568 | 15.00622607 |
| Zn | -10.58780814 | -12.90864012 | 14.67876958 |
| Zn | -7.80555146  | -11.28191621 | 14.82863257 |
| Zn | -7.82152802  | -8.46378912  | 14.90088861 |
| Zn | -5.00589989  | -6.97483432  | 14.80804768 |
| Zn | 0.35996746   | -13.48220344 | 14.82006036 |
| Zn | -7.84390349  | -17.62505916 | 14.69325059 |
| Zn | -7.92819514  | -14.45084672 | 14.64839426 |
| Zn | -5.03263849  | -13.26253217 | 14.66454116 |
| Zn | -5.12065024  | -10.02425794 | 14.87902998 |
| Zn | -2.38087430  | -8.71217534  | 14.80955555 |
| Zn | -2.38459276  | -5.47605398  | 14.79882384 |
| Zn | 0.34312342   | -4.14383108  | 14.80582814 |
| Zn | 0.29927372   | -0.94235138  | 14.78447220 |
| Zn | -13.44860740 | -13.99274858 | 14.80717582 |
| Zn | -7.94662570  | -20.38872743 | 14.81904297 |
| Zn | -10.66457412 | -9.68338415  | 14.80888536 |
| Zn | -5.00331415  | -16.20844629 | 14.82875992 |
| Zn | -2.39575264  | -14.79073792 | 14.83259304 |
| Zn | -2.24794258  | -11.74226678 | 14.81277174 |
| Zn | 0.36702349   | -10.23893749 | 14.79962109 |
| Zn | 0.45819918   | -7.20804375  | 14.79436941 |
| Zn | 3.06429983   | -5.68855470  | 14.79780735 |
| Zn | -13.31574829 | -16.97586625 | 14.80406517 |
| Zn | -2.29929931  | -2.44427541  | 14.79113948 |
| Zn | 3.08378172   | -8.91114862  | 14.81242330 |
| Zn | -10.58011016 | -21.77018070 | 14.75464681 |
| Zn | -10.70246908 | -18.74418940 | 14.78581070 |

## 22/28 Pt

156

Lattice="1.3859292911 16.8034996355 0.0 -9.7015050379 16.8034996355 0.0 0.0 0.0 21.0278333531"

|    |             |             |            |
|----|-------------|-------------|------------|
| Pt | -8.31557575 | 28.80599938 | 5.50000000 |
| Pt | -8.31557575 | 24.00499948 | 5.50000000 |
| Pt | -6.92964646 | 26.40549943 | 5.50000000 |
| Pt | -8.31557575 | 19.20399958 | 5.50000000 |
| Pt | -6.92964646 | 21.60449953 | 5.50000000 |
| Pt | -5.54371716 | 24.00499948 | 5.50000000 |
| Pt | -8.31557575 | 14.40299969 | 5.50000000 |
| Pt | -6.92964646 | 16.80349964 | 5.50000000 |
| Pt | -5.54371716 | 19.20399958 | 5.50000000 |
| Pt | -4.15778787 | 21.60449953 | 5.50000000 |
| Pt | -6.92964646 | 12.00249974 | 5.50000000 |
| Pt | -5.54371716 | 14.40299969 | 5.50000000 |
| Pt | -4.15778787 | 16.80349964 | 5.50000000 |
| Pt | -2.77185858 | 19.20399958 | 5.50000000 |
| Pt | -5.54371716 | 9.60199979  | 5.50000000 |
| Pt | -4.15778787 | 12.00249974 | 5.50000000 |
| Pt | -2.77185858 | 14.40299969 | 5.50000000 |



|    |             |             |             |
|----|-------------|-------------|-------------|
| Pt | -1.38592929 | 16.80349964 | 5.50000000  |
| Pt | -4.15778787 | 7.20149984  | 5.50000000  |
| Pt | -2.77185858 | 9.60199979  | 5.50000000  |
| Pt | -1.38592929 | 12.00249974 | 5.50000000  |
| Pt | 0.00000000  | 14.40299969 | 5.50000000  |
| Pt | -2.77185858 | 4.80099990  | 5.50000000  |
| Pt | -1.38592929 | 7.20149984  | 5.50000000  |
| Pt | 0.00000000  | 9.60199979  | 5.50000000  |
| Pt | -1.38592929 | 2.40049995  | 5.50000000  |
| Pt | 0.00000000  | 4.80099990  | 5.50000000  |
| Pt | 0.00000000  | 0.00000000  | 5.50000000  |
| Pt | -6.92235713 | 29.63867611 | 7.78800162  |
| Pt | -6.91413048 | 24.81979949 | 7.79325289  |
| Pt | -5.53252117 | 27.22650995 | 7.78808136  |
| Pt | -6.92578346 | 20.03936427 | 7.81928852  |
| Pt | -5.53207614 | 22.42347595 | 7.80212370  |
| Pt | -4.13858579 | 24.82699002 | 7.78829513  |
| Pt | -6.93168417 | 15.24305282 | 7.78752323  |
| Pt | -5.54479006 | 17.64395835 | 7.79700127  |
| Pt | -4.15263006 | 20.03324179 | 7.79679387  |
| Pt | -2.75406476 | 22.42842233 | 7.78019957  |
| Pt | -5.53999680 | 12.83698142 | 7.79481713  |
| Pt | -4.15945084 | 15.23516431 | 7.78952992  |
| Pt | -2.77129195 | 17.64597908 | 7.79865948  |
| Pt | -1.36176213 | 20.03290422 | 7.79193802  |
| Pt | -4.14786719 | 10.42633395 | 7.79146364  |
| Pt | -2.76558843 | 12.83294847 | 7.78630491  |
| Pt | -1.38723995 | 15.24267800 | 7.78658439  |
| Pt | 0.01283939  | 17.64454356 | 7.79089584  |
| Pt | -2.74988322 | 8.02367806  | 7.79898289  |
| Pt | -1.37152746 | 10.41730239 | 7.79066308  |
| Pt | 0.00101156  | 12.83311819 | 7.79528214  |
| Pt | -8.31476788 | 32.03494919 | 7.78620184  |
| Pt | -1.36553026 | 5.62408989  | 7.80928538  |
| Pt | 0.01812425  | 8.01528350  | 7.79666850  |
| Pt | -8.30509314 | 27.22861997 | 7.79018089  |
| Pt | 0.01723648  | 3.23717648  | 7.83023599  |
| Pt | -8.30236500 | 22.41781126 | 7.81404608  |
| Pt | -8.31306605 | 17.64724672 | 7.80442249  |
| Pt | -8.30504026 | 30.46482380 | 10.03274491 |
| Pt | -8.28921099 | 25.65251907 | 10.04036149 |
| Pt | -6.91042536 | 28.06189561 | 10.02814638 |
| Pt | -8.27769425 | 20.87851872 | 10.14228456 |
| Pt | -6.89552780 | 23.25074591 | 10.04360302 |
| Pt | -5.50160820 | 25.66739595 | 10.03311459 |
| Pt | -8.32469556 | 16.04988189 | 10.03756129 |
| Pt | -6.93738365 | 18.46451313 | 10.05938975 |
| Pt | -5.52851321 | 20.83789231 | 10.08284258 |
| Pt | -4.11815676 | 23.25569117 | 10.02241594 |
| Pt | -6.92914905 | 13.67217794 | 10.03397886 |
| Pt | -5.54120510 | 16.06730959 | 10.03440509 |
| Pt | -4.16435145 | 18.47225055 | 10.05834047 |
| Pt | -2.72438362 | 20.85387360 | 10.02552679 |
| Pt | -5.52529814 | 11.24878950 | 10.02842084 |
| Pt | -4.14323836 | 13.66562103 | 10.03056351 |
| Pt | -2.77919470 | 16.05448553 | 10.03492635 |
| Pt | -1.37209883 | 18.46308062 | 10.03891182 |
| Pt | -4.13029973 | 8.85237522  | 10.04737658 |
| Pt | -2.74701053 | 11.25210306 | 10.02440695 |
| Pt | -1.38719485 | 13.67014324 | 10.03248737 |
| Pt | 0.00669291  | 16.06629885 | 10.02660948 |
| Pt | -2.73975759 | 6.45072905  | 10.03640450 |
| Pt | -1.33557781 | 8.84416282  | 10.05824490 |

|    |             |             |             |
|----|-------------|-------------|-------------|
| Pt | 0.01928044  | 11.24161746 | 10.03099950 |
| Pt | -1.35214345 | 4.04226891  | 10.09875126 |
| Pt | 0.02496289  | 6.43928926  | 10.06769636 |
| Pt | 0.00442856  | 1.67406024  | 10.07496488 |
| Pt | -8.28195762 | 28.89406345 | 12.30927771 |
| Pt | -8.27330803 | 24.09774801 | 12.33598556 |
| Pt | -6.87454866 | 26.49448050 | 12.31488321 |
| Pt | -8.32785217 | 19.28536421 | 12.39487261 |
| Pt | -6.86283766 | 21.74066220 | 12.40218394 |
| Pt | -5.46567880 | 24.12479300 | 12.30047242 |
| Pt | -8.31130967 | 14.49346782 | 12.36592377 |
| Pt | -6.93553405 | 16.86555637 | 12.29813989 |
| Pt | -5.55506674 | 19.27582291 | 12.39500619 |
| Pt | -4.07039802 | 21.69939154 | 12.27568044 |
| Pt | -6.90687795 | 12.09327137 | 12.30940374 |
| Pt | -5.53366025 | 14.48336376 | 12.32216953 |
| Pt | -4.16389842 | 16.88338490 | 12.33853762 |
| Pt | -2.77233153 | 19.28646081 | 12.33748304 |
| Pt | -5.47988658 | 9.71536175  | 12.36492979 |
| Pt | -4.12158031 | 12.09289516 | 12.29768911 |
| Pt | -2.76491617 | 14.49155046 | 12.36562465 |
| Pt | -1.39097114 | 16.86995688 | 12.29057016 |
| Pt | -4.09242269 | 7.28059770  | 12.35899634 |
| Pt | -2.71169599 | 9.68541385  | 12.30949340 |
| Pt | -1.35975897 | 12.08858093 | 12.30395164 |
| Pt | 0.00924137  | 14.48549877 | 12.31792005 |
| Pt | -2.72111678 | 4.92027803  | 12.36595717 |
| Pt | -1.33867861 | 7.28341617  | 12.37412146 |
| Pt | 0.06007200  | 9.70285695  | 12.37513166 |
| Pt | -1.39238971 | 2.48879291  | 12.40851671 |
| Pt | 0.03125892  | 4.91077154  | 12.43440383 |
| Pt | -0.01014941 | 0.08477431  | 12.33351928 |
| O  | -6.83679614 | 28.19082633 | 15.42157539 |
| O  | -5.50159574 | 12.90033886 | 15.43961686 |
| O  | -6.40573744 | 22.04556223 | 14.54629780 |
| O  | -3.73892580 | 23.59395751 | 15.36956327 |
| O  | -5.35310357 | 9.85042047  | 14.52745409 |
| O  | -2.66663108 | 11.39992200 | 15.39493780 |
| O  | -5.68039006 | 15.98957657 | 15.44241524 |
| O  | -2.97185694 | 17.49515054 | 15.47420676 |
| O  | -3.40747198 | 20.58813403 | 15.41613241 |
| O  | -2.14359742 | 5.25853564  | 15.29650279 |
| O  | -2.80238696 | 14.45724414 | 14.53656718 |
| O  | -0.13493219 | 16.01104632 | 15.42364541 |
| O  | -0.34530914 | 19.09535002 | 14.55416478 |
| O  | -8.89414668 | 20.55566051 | 15.63812700 |
| O  | -2.45697862 | 8.37017252  | 15.47707557 |
| O  | 0.18018132  | 9.82481937  | 14.53003553 |
| O  | 0.04200261  | 12.91010299 | 15.43331902 |
| O  | -8.34880773 | 14.45555854 | 14.53929784 |
| O  | 0.47604682  | 6.84518576  | 15.42337810 |
| O  | -6.58900752 | 25.14839199 | 15.43865837 |
| O  | -8.51610626 | 17.50400192 | 15.46940618 |
| O  | -5.87924023 | 19.07082830 | 14.56402081 |
| Zn | -6.45445831 | 11.40666426 | 14.86265657 |
| Zn | -6.44362365 | 14.39052205 | 14.86315660 |
| Zn | -4.48370088 | 21.97679802 | 14.80713338 |
| Zn | -4.84484026 | 24.97576272 | 14.87129561 |
| Zn | -3.44451976 | 9.79718117  | 14.84079186 |
| Zn | -3.74890314 | 12.79463097 | 14.85224846 |
| Zn | -3.91332184 | 15.99977724 | 14.87144608 |
| Zn | -3.99059521 | 18.91629521 | 14.87762220 |
| Zn | -1.65588262 | 20.52539503 | 14.77102756 |

|    |             |             |             |
|----|-------------|-------------|-------------|
| Zn | -3.28001221 | 6.72160243  | 15.19093096 |
| Zn | -0.89711671 | 14.40430469 | 14.86218452 |
| Zn | -1.23170791 | 17.38809893 | 14.84099612 |
| Zn | 0.12116207  | 2.13964523  | 14.98373568 |
| Zn | -0.29779176 | 5.16804156  | 15.12108796 |
| Zn | -0.72446203 | 8.13885731  | 14.89060514 |
| Zn | -0.89221816 | 11.40316767 | 14.85746866 |
| Zn | -7.90374028 | 29.59391779 | 14.85818901 |
| Zn | -8.06740356 | 32.81176154 | 14.85726255 |
| Zn | -7.47341131 | 23.61890475 | 14.85626258 |
| Zn | -7.61372710 | 26.58910693 | 14.86456423 |
| Zn | -6.77033240 | 17.36307153 | 14.85071419 |
| Zn | -7.26499874 | 20.36011618 | 14.81435178 |

### 18/27 Cu

144

Lattice="-14.0396051405 -2.2106644929 0.0 -15.3159328805 -13.2639869572 0.0 0.0 0.0 20.4908976028"

|    |              |              |            |
|----|--------------|--------------|------------|
| Cu | -25.52655480 | -13.26398696 | 5.50000000 |
| Cu | -22.97389932 | -13.26398696 | 5.50000000 |
| Cu | -21.69757158 | -11.05332246 | 5.50000000 |
| Cu | -20.42124384 | -8.84265797  | 5.50000000 |
| Cu | -20.42124384 | -13.26398696 | 5.50000000 |
| Cu | -19.14491610 | -11.05332246 | 5.50000000 |
| Cu | -17.86858836 | -8.84265797  | 5.50000000 |
| Cu | -16.59226062 | -6.63199348  | 5.50000000 |
| Cu | -15.31593288 | -4.42132899  | 5.50000000 |
| Cu | -17.86858836 | -13.26398696 | 5.50000000 |
| Cu | -16.59226062 | -11.05332246 | 5.50000000 |
| Cu | -15.31593288 | -8.84265797  | 5.50000000 |
| Cu | -14.03960514 | -6.63199348  | 5.50000000 |
| Cu | -12.76327740 | -4.42132899  | 5.50000000 |
| Cu | -11.48694966 | -2.21066449  | 5.50000000 |
| Cu | -14.03960514 | -11.05332246 | 5.50000000 |
| Cu | -12.76327740 | -8.84265797  | 5.50000000 |
| Cu | -11.48694966 | -6.63199348  | 5.50000000 |
| Cu | -10.21062192 | -4.42132899  | 5.50000000 |
| Cu | -8.93429418  | -2.21066449  | 5.50000000 |
| Cu | -10.21062192 | -8.84265797  | 5.50000000 |
| Cu | -8.93429418  | -6.63199348  | 5.50000000 |
| Cu | -7.65796644  | -4.42132899  | 5.50000000 |
| Cu | -6.38163870  | -2.21066449  | 5.50000000 |
| Cu | -5.10531096  | -4.42132899  | 5.50000000 |
| Cu | -3.82898322  | -2.21066449  | 5.50000000 |
| Cu | 0.00000000   | 0.00000000   | 5.50000000 |
| Cu | -24.24144761 | -12.50090960 | 7.56057806 |
| Cu | -21.69376314 | -12.50531568 | 7.55381972 |
| Cu | -20.42326789 | -10.29062235 | 7.57958765 |
| Cu | -19.14233607 | -8.09015046  | 7.56879478 |
| Cu | -19.14476758 | -12.49634050 | 7.54340916 |
| Cu | -17.86851675 | -10.28726756 | 7.55349740 |
| Cu | -16.57772728 | -8.08628576  | 7.55052979 |
| Cu | -15.29066784 | -5.87693693  | 7.55832450 |
| Cu | -14.01786699 | -3.66930277  | 7.57504170 |
| Cu | -16.57647132 | -12.51629468 | 7.55625427 |
| Cu | -15.29726283 | -10.30301964 | 7.55072297 |
| Cu | -14.01057014 | -8.08048292  | 7.56846647 |
| Cu | -12.74140265 | -5.87834134  | 7.61412481 |
| Cu | -11.48120600 | -3.68433570  | 7.60414698 |
| Cu | -25.52259256 | -14.74139461 | 7.55644492 |
| Cu | -12.74299177 | -10.29765836 | 7.55807590 |
| Cu | -11.47091439 | -8.08110597  | 7.59001170 |
| Cu | -10.20319826 | -5.88015423  | 7.60466999 |
| Cu | -8.93148301  | -3.68784469  | 7.57479371 |

|    |              |              |             |
|----|--------------|--------------|-------------|
| Cu | -7.65303158  | -1.47167271  | 7.54172879  |
| Cu | -22.96644604 | -10.28247101 | 7.60499809  |
| Cu | -7.66074664  | -5.88941764  | 7.61806759  |
| Cu | -6.38197477  | -3.69348071  | 7.56440915  |
| Cu | -5.09940034  | -1.46512821  | 7.53391355  |
| Cu | -17.84489097 | -5.88006542  | 7.55176491  |
| Cu | -2.52402395  | -1.45593913  | 7.55609994  |
| Cu | -28.06364046 | -14.72698164 | 7.56184912  |
| Cu | -11.47877033 | -9.56121005  | 9.63344848  |
| Cu | -22.96248459 | -11.77165009 | 9.61292104  |
| Cu | -21.67279966 | -9.58442726  | 9.71602976  |
| Cu | -6.36167866  | -5.17606024  | 9.66240454  |
| Cu | -20.42682261 | -11.77165646 | 9.61429039  |
| Cu | -19.14055586 | -9.56070242  | 9.63219802  |
| Cu | -17.84547874 | -7.35428807  | 9.59984492  |
| Cu | -16.55103248 | -5.13305053  | 9.60773052  |
| Cu | -1.23575880  | -0.71616069  | 9.64673127  |
| Cu | -17.85746272 | -11.76721461 | 9.55553466  |
| Cu | -16.56910583 | -9.55831989  | 9.56819493  |
| Cu | -15.29689123 | -7.34196857  | 9.59039534  |
| Cu | -14.03766192 | -5.12085395  | 9.64221144  |
| Cu | -12.75829022 | -2.91537319  | 9.64759834  |
| Cu | -26.77940649 | -13.98815130 | 9.59232806  |
| Cu | -14.01646089 | -9.55832328  | 9.59410045  |
| Cu | -12.73557598 | -7.35491785  | 9.67983094  |
| Cu | -11.46140543 | -5.15112718  | 9.72193660  |
| Cu | -10.19047284 | -2.95514669  | 9.64198941  |
| Cu | -24.24324607 | -13.99752971 | 9.55868865  |
| Cu | -10.21213257 | -7.34211523  | 9.69284809  |
| Cu | -8.93470403  | -5.14763071  | 9.69341062  |
| Cu | -7.64662110  | -2.95725002  | 9.60290394  |
| Cu | -21.68728200 | -14.00379828 | 9.56217193  |
| Cu | -5.08738783  | -2.95446701  | 9.55500754  |
| Cu | -3.81790440  | -0.72067096  | 9.53171132  |
| Cu | -15.29589966 | -11.78012421 | 9.60149649  |
| Cu | -25.50025701 | -13.26219684 | 11.65925119 |
| Cu | -22.94611696 | -13.29114957 | 11.56528178 |
| Cu | -21.68881120 | -11.10474965 | 11.77182915 |
| Cu | -20.35691812 | -8.83201335  | 11.82208956 |
| Cu | -20.39282164 | -13.28994779 | 11.60427259 |
| Cu | -19.11328154 | -11.06536691 | 11.62934982 |
| Cu | -17.81596463 | -8.82819606  | 11.63260761 |
| Cu | -16.56923417 | -6.59885306  | 11.66470487 |
| Cu | -15.33671560 | -4.35044951  | 11.80847946 |
| Cu | -17.89529980 | -13.21206269 | 11.55710985 |
| Cu | -16.59875055 | -11.00339585 | 11.59688227 |
| Cu | -15.31449145 | -8.78966971  | 11.61922309 |
| Cu | -14.06958926 | -6.56876953  | 11.64684953 |
| Cu | -12.79290273 | -4.34896371  | 11.67818165 |
| Cu | -11.46442573 | -2.15689083  | 11.66032199 |
| Cu | -14.00235400 | -11.02547196 | 11.61164192 |
| Cu | -12.76520252 | -8.85875825  | 11.72588358 |
| Cu | -11.48823943 | -6.62692867  | 11.83969089 |
| Cu | -10.16016791 | -4.36820020  | 11.81497384 |
| Cu | -8.86068519  | -2.18126823  | 11.62835202 |
| Cu | -24.23843154 | -11.07530392 | 11.69221676 |
| Cu | -8.89655269  | -6.63808440  | 11.73920600 |
| Cu | -7.58537100  | -4.41333011  | 11.70469595 |
| Cu | -6.31976479  | -2.21925807  | 11.62223978 |
| Cu | -5.04452351  | -4.37536647  | 11.65659035 |
| Cu | -3.82583373  | -2.16573474  | 11.54754178 |
| Cu | -15.29889535 | -13.17912283 | 11.79249033 |
| O  | -21.74259268 | -11.68960297 | 13.91650493 |

|    |              |              |             |
|----|--------------|--------------|-------------|
| O  | -8.88318198  | -6.68652709  | 15.08959207 |
| O  | -19.88826497 | -9.03557586  | 13.97748937 |
| O  | -7.05507251  | -3.97515099  | 14.92113846 |
| O  | -13.57894874 | -9.48716776  | 13.94794090 |
| O  | -14.86815686 | -6.67059255  | 14.90674130 |
| O  | -17.96044770 | -6.42887208  | 14.15981787 |
| O  | -5.18449052  | -1.31579924  | 14.74991524 |
| O  | -11.81251126 | -6.71795556  | 13.95261867 |
| O  | -13.05086082 | -3.94631292  | 15.11119057 |
| O  | -2.00387753  | -1.61548085  | 13.98302776 |
| O  | -18.62294291 | -11.94002070 | 14.64318364 |
| O  | -10.08711019 | -3.94904653  | 13.91394893 |
| O  | -26.52300316 | -14.46564534 | 15.13175037 |
| O  | -23.59404512 | -14.45368743 | 13.84656038 |
| O  | -24.68833023 | -11.70041366 | 15.11148067 |
| O  | -15.44476509 | -12.25727592 | 13.94640852 |
| O  | -16.71531318 | -9.35809031  | 14.61238609 |
| Zn | -21.60278653 | -9.81423747  | 14.14001906 |
| Zn | -10.42276197 | -7.68329644  | 14.79814220 |
| Zn | -19.67865152 | -7.16498643  | 14.20438965 |
| Zn | -8.63761227  | -4.89378957  | 14.65916719 |
| Zn | -13.52590909 | -7.59188031  | 13.98742123 |
| Zn | -16.46309218 | -7.52374894  | 14.44497313 |
| Zn | -3.75079310  | -2.34747867  | 14.14391076 |
| Zn | -6.79828738  | -2.18990373  | 14.44009853 |
| Zn | -11.77762326 | -4.81679530  | 14.05031050 |
| Zn | -14.61812977 | -4.85022327  | 14.67798221 |
| Zn | -17.19625402 | -12.97711273 | 14.04049436 |
| Zn | -20.25148528 | -12.78602527 | 14.32857317 |
| Zn | -10.01548612 | -2.01153454  | 13.91128379 |
| Zn | -12.78049280 | -2.13138192  | 14.82788851 |
| Zn | -23.47965189 | -12.53434154 | 13.92384219 |
| Zn | -12.21999715 | -10.44442863 | 14.83663116 |
| Zn | -15.30334891 | -10.33250390 | 13.83070908 |
| Zn | -18.34559892 | -10.14970253 | 14.16245918 |

## 24/28 Ag

160

Lattice="-20.2444671454 0.0 0.0 -17.3524004103 -10.018413048 0.0 0.0 0.0 21.3222819904"

|    |              |             |            |
|----|--------------|-------------|------------|
| Ag | -30.36670072 | -7.51380979 | 5.50000000 |
| Ag | -27.47463398 | -7.51380979 | 5.50000000 |
| Ag | -26.02860061 | -5.00920652 | 5.50000000 |
| Ag | -24.58256725 | -7.51380979 | 5.50000000 |
| Ag | -23.13653388 | -5.00920652 | 5.50000000 |
| Ag | -21.69050051 | -2.50460326 | 5.50000000 |
| Ag | -21.69050051 | -7.51380979 | 5.50000000 |
| Ag | -20.24446714 | -5.00920652 | 5.50000000 |
| Ag | -18.79843378 | -2.50460326 | 5.50000000 |
| Ag | -17.35240041 | 0.00000000  | 5.50000000 |
| Ag | -18.79843378 | -7.51380979 | 5.50000000 |
| Ag | -17.35240041 | -5.00920652 | 5.50000000 |
| Ag | -15.90636704 | -2.50460326 | 5.50000000 |
| Ag | -14.46033368 | 0.00000000  | 5.50000000 |
| Ag | -15.90636704 | -7.51380979 | 5.50000000 |
| Ag | -14.46033367 | -5.00920652 | 5.50000000 |
| Ag | -13.01430031 | -2.50460326 | 5.50000000 |
| Ag | -11.56826694 | 0.00000000  | 5.50000000 |
| Ag | -13.01430031 | -7.51380979 | 5.50000000 |
| Ag | -11.56826694 | -5.00920652 | 5.50000000 |
| Ag | -10.12223357 | -2.50460326 | 5.50000000 |
| Ag | -8.67620021  | 0.00000000  | 5.50000000 |
| Ag | -8.67620021  | -5.00920652 | 5.50000000 |
| Ag | -7.23016684  | -2.50460326 | 5.50000000 |

|    |              |             |             |
|----|--------------|-------------|-------------|
| Ag | -5.78413347  | 0.00000000  | 5.50000000  |
| Ag | -4.33810010  | -2.50460326 | 5.50000000  |
| Ag | -2.89206674  | 0.00000000  | 5.50000000  |
| Ag | 0.00000000   | 0.00000000  | 5.50000000  |
| Ag | -28.92561447 | -6.71443959 | 7.85643565  |
| Ag | -26.03525020 | -6.72334166 | 7.85547940  |
| Ag | -24.57826602 | -4.20614336 | 7.83987461  |
| Ag | -23.12503909 | -6.72111335 | 7.85695294  |
| Ag | -21.67990270 | -4.20663075 | 7.85100434  |
| Ag | -20.25151768 | -1.70164709 | 7.86756619  |
| Ag | -20.22713189 | -6.71083538 | 7.86476231  |
| Ag | -18.78403073 | -4.19167021 | 7.87022408  |
| Ag | -17.34941642 | -1.69312425 | 7.87381172  |
| Ag | -33.25492734 | -9.21694621 | 7.86601326  |
| Ag | -17.35285451 | -6.69835820 | 7.86410495  |
| Ag | -15.89668103 | -4.18946904 | 7.86918473  |
| Ag | -14.45684351 | -1.69551482 | 7.87165856  |
| Ag | -30.36419223 | -9.21197530 | 7.88326765  |
| Ag | -14.46363598 | -6.70806409 | 7.86228879  |
| Ag | -13.01723269 | -4.20860433 | 7.86481560  |
| Ag | -11.56692588 | -1.69663254 | 7.85889602  |
| Ag | -27.47812316 | -9.20738948 | 7.89183815  |
| Ag | -31.81732638 | -6.71379702 | 7.86183868  |
| Ag | -10.12123262 | -4.20782014 | 7.85365188  |
| Ag | -8.67211332  | -1.68885712 | 7.85740760  |
| Ag | -24.58965612 | -9.20203218 | 7.89554153  |
| Ag | -27.47336292 | -4.20870281 | 7.84912844  |
| Ag | -5.78397023  | -1.68182517 | 7.86001419  |
| Ag | -21.69986076 | -9.20655934 | 7.87824984  |
| Ag | -23.14534492 | -1.69326165 | 7.86447338  |
| Ag | -18.81300798 | -9.22009405 | 7.84717512  |
| Ag | -36.15885145 | -9.21491691 | 7.84294915  |
| Ag | -30.36221711 | -5.90215707 | 10.19338842 |
| Ag | -27.47071457 | -5.90221964 | 10.17801045 |
| Ag | -26.00391958 | -3.36224154 | 10.14457199 |
| Ag | -24.57086388 | -5.91715156 | 10.14344960 |
| Ag | -23.11385814 | -3.38978147 | 10.16107764 |
| Ag | -21.69597602 | -0.87471677 | 10.20830706 |
| Ag | -21.66136096 | -5.90435196 | 10.17593600 |
| Ag | -20.23019030 | -3.39300832 | 10.20444122 |
| Ag | -18.80394486 | -0.87613074 | 10.19227382 |
| Ag | -34.72873152 | -8.41738693 | 10.17410418 |
| Ag | -18.78307580 | -5.85484788 | 10.21290955 |
| Ag | -17.32705195 | -3.37130124 | 10.23093777 |
| Ag | -15.88989168 | -0.88097589 | 10.22055922 |
| Ag | -31.81918649 | -8.39886903 | 10.22473875 |
| Ag | -15.90381791 | -5.85142664 | 10.18391169 |
| Ag | -14.42320472 | -3.38459306 | 10.22270728 |
| Ag | -13.00107502 | -0.88068707 | 10.21196142 |
| Ag | -28.91973461 | -8.36829950 | 10.24850635 |
| Ag | -13.01542329 | -5.91183452 | 10.20799459 |
| Ag | -11.54921550 | -3.39367847 | 10.17499689 |
| Ag | -10.12295579 | -0.88012132 | 10.20533411 |
| Ag | -26.04036309 | -8.38103900 | 10.27685314 |
| Ag | -8.65479085  | -3.37332046 | 10.15946940 |
| Ag | -7.23310431  | -0.86724562 | 10.22522500 |
| Ag | -23.14279271 | -8.39393566 | 10.26279810 |
| Ag | -4.33521834  | -0.86337788 | 10.23192308 |
| Ag | -20.24905654 | -8.39476636 | 10.21363371 |
| Ag | -17.38573821 | -8.39797331 | 10.15498906 |
| Ag | -30.41400476 | -7.57302430 | 12.57656472 |
| Ag | -27.48876034 | -7.52586007 | 12.67988935 |
| Ag | -25.98639399 | -5.03914687 | 12.41504706 |

|    |              |             |             |
|----|--------------|-------------|-------------|
| Ag | -24.60448040 | -7.59971504 | 12.67108307 |
| Ag | -23.13541024 | -5.11108470 | 12.43166888 |
| Ag | -21.66264077 | -2.56683504 | 12.54374504 |
| Ag | -21.71560704 | -7.58151587 | 12.60964387 |
| Ag | -20.27049716 | -5.07289735 | 12.58993289 |
| Ag | -18.79777897 | -2.55588299 | 12.56611400 |
| Ag | -17.35647879 | -0.13121302 | 12.56599370 |
| Ag | -18.84157269 | -7.49137184 | 12.53385921 |
| Ag | -17.34528811 | -5.03704325 | 12.63495016 |
| Ag | -15.83659933 | -2.57464194 | 12.57275612 |
| Ag | -14.44320733 | -0.08542902 | 12.58852343 |
| Ag | -15.98826773 | -7.52421293 | 12.42083885 |
| Ag | -14.43913120 | -5.11003379 | 12.58982759 |
| Ag | -12.92669005 | -2.58481153 | 12.54269605 |
| Ag | -11.58274986 | -0.01127339 | 12.56103737 |
| Ag | -33.34633016 | -7.63861229 | 12.52100310 |
| Ag | -11.56618180 | -5.09827748 | 12.53532500 |
| Ag | -10.07521715 | -2.59837556 | 12.50444929 |
| Ag | -8.72672084  | -0.04671430 | 12.59352069 |
| Ag | -28.90211274 | -5.03185703 | 12.49994582 |
| Ag | -7.16742187  | -2.58957454 | 12.52151486 |
| Ag | -5.79823672  | -0.08068832 | 12.59340985 |
| Ag | -24.50224120 | -2.58707476 | 12.52038251 |
| Ag | -2.86847177  | -0.03559186 | 12.56110815 |
| Ag | -20.23502719 | -0.04590548 | 12.52955933 |
| O  | -33.90385197 | -8.06309280 | 14.92001653 |
| O  | -12.84071940 | -5.17120752 | 15.87738600 |
| O  | -30.77815891 | -7.31813211 | 15.01114937 |
| O  | -9.72046896  | -4.35584086 | 15.68441873 |
| O  | -27.65402211 | -6.61419614 | 15.10560508 |
| O  | -6.62181817  | -3.55343013 | 15.47559784 |
| O  | -24.53640193 | -5.71967616 | 15.11105363 |
| O  | -23.75041965 | -2.71568729 | 15.62228700 |
| O  | -21.40281130 | -4.82123826 | 15.05265294 |
| O  | -20.58956446 | -1.84480653 | 15.81479884 |
| O  | -18.28423364 | -4.01009701 | 15.29897710 |
| O  | -17.43467872 | -0.97609630 | 15.72219600 |
| O  | -15.18446771 | -3.16170756 | 15.12218000 |
| O  | -14.32640648 | -0.17555667 | 15.80148129 |
| O  | -12.06611497 | -2.26173886 | 14.96392986 |
| O  | -28.54266785 | -9.43734932 | 16.02643332 |
| O  | -8.89794544  | -1.35488796 | 15.03825757 |
| O  | -25.35919548 | -8.55926579 | 16.20753405 |
| O  | -5.76324375  | -0.53676876 | 15.04551212 |
| O  | -22.21535905 | -7.70129162 | 16.06654103 |
| O  | -19.99128796 | -9.81380400 | 14.98046697 |
| O  | -19.11523611 | -6.95795261 | 15.92163606 |
| O  | -16.82725428 | -8.97563951 | 14.88913589 |
| O  | -15.96450512 | -6.12353826 | 15.93660592 |
| Zn | -12.31292668 | -6.77922857 | 15.13423544 |
| Zn | -14.64615341 | -4.87606858 | 15.60196393 |
| Zn | -29.42373113 | -6.03003134 | 15.11012915 |
| Zn | -11.50358976 | -3.98944788 | 15.36706691 |
| Zn | -26.34496763 | -5.28551549 | 15.05453384 |
| Zn | -8.40439363  | -3.15224060 | 15.17920898 |
| Zn | -23.22555291 | -4.39867029 | 15.02843682 |
| Zn | -5.26225281  | -2.33754545 | 15.18411034 |
| Zn | -20.07257839 | -3.53098844 | 15.22766586 |
| Zn | -22.35021935 | -1.54697982 | 15.36698144 |
| Zn | -16.98566779 | -2.70043415 | 15.20309564 |
| Zn | -19.21701843 | -0.69333860 | 15.36502525 |
| Zn | -13.87350618 | -1.85363396 | 15.17088896 |
| Zn | -33.42152805 | -9.81515893 | 15.33453173 |

|    |              |             |             |
|----|--------------|-------------|-------------|
| Zn | -10.72131864 | -0.97146054 | 15.10825628 |
| Zn | -30.26689847 | -9.03610607 | 15.52195766 |
| Zn | -7.55007130  | -0.10862937 | 15.32226560 |
| Zn | -27.13678005 | -8.26196552 | 15.81982229 |
| Zn | -21.75023966 | -9.31305617 | 15.30271109 |
| Zn | -24.00887044 | -7.35651746 | 15.79134593 |
| Zn | -18.62587831 | -8.53926740 | 15.09766441 |
| Zn | -20.87226987 | -6.52309567 | 15.55748639 |
| Zn | -15.48107251 | -7.67900272 | 15.04356548 |
| Zn | -17.74831632 | -5.74943956 | 15.64851560 |

## 24/28 Au

160

Lattice="20.1949696707 0.0 0.0 17.3099740034 9.9939181506 0.0 0.0 0.0 21.3049614823"

|    |             |            |            |
|----|-------------|------------|------------|
| Au | 0.00000000  | 0.00000000 | 5.50000000 |
| Au | 2.88499567  | 0.00000000 | 5.50000000 |
| Au | 4.32749350  | 2.49847954 | 5.50000000 |
| Au | 5.76999133  | 0.00000000 | 5.50000000 |
| Au | 7.21248917  | 2.49847954 | 5.50000000 |
| Au | 8.65498700  | 4.99695908 | 5.50000000 |
| Au | 8.65498700  | 0.00000000 | 5.50000000 |
| Au | 10.09748484 | 2.49847954 | 5.50000000 |
| Au | 11.53998267 | 4.99695908 | 5.50000000 |
| Au | 12.98248050 | 7.49543861 | 5.50000000 |
| Au | 11.53998267 | 0.00000000 | 5.50000000 |
| Au | 12.98248050 | 2.49847954 | 5.50000000 |
| Au | 14.42497834 | 4.99695908 | 5.50000000 |
| Au | 15.86747617 | 7.49543861 | 5.50000000 |
| Au | 14.42497834 | 0.00000000 | 5.50000000 |
| Au | 15.86747617 | 2.49847954 | 5.50000000 |
| Au | 17.30997400 | 4.99695908 | 5.50000000 |
| Au | 18.75247184 | 7.49543861 | 5.50000000 |
| Au | 17.30997400 | 0.00000000 | 5.50000000 |
| Au | 18.75247184 | 2.49847954 | 5.50000000 |
| Au | 20.19496967 | 4.99695908 | 5.50000000 |
| Au | 21.63746750 | 7.49543861 | 5.50000000 |
| Au | 21.63746750 | 2.49847954 | 5.50000000 |
| Au | 23.07996534 | 4.99695908 | 5.50000000 |
| Au | 24.52246317 | 7.49543861 | 5.50000000 |
| Au | 25.96496100 | 4.99695908 | 5.50000000 |
| Au | 27.40745884 | 7.49543861 | 5.50000000 |
| Au | 30.29245451 | 7.49543861 | 5.50000000 |
| Au | 1.42667277  | 0.67360952 | 7.95859507 |
| Au | 4.31033960  | 0.67313162 | 7.95609716 |
| Au | 5.76347528  | 3.17650000 | 7.93093311 |
| Au | 7.20281472  | 0.68476791 | 7.95998365 |
| Au | 8.66043714  | 3.18874748 | 7.93914139 |
| Au | 10.08552841 | 5.69823764 | 7.97020099 |
| Au | 10.10093745 | 0.68940935 | 7.98370748 |
| Au | 11.54823461 | 3.18682381 | 7.96698688 |
| Au | 12.96489281 | 5.67533465 | 7.93794390 |
| Au | 14.40653648 | 8.20385802 | 7.91829379 |
| Au | 12.98531327 | 0.69582033 | 7.98900645 |
| Au | 14.42841989 | 3.19726420 | 8.00215842 |
| Au | 15.86965934 | 5.67764153 | 7.93177973 |
| Au | 17.31200252 | 8.18671903 | 7.93313824 |
| Au | 15.84908088 | 0.71879898 | 7.97020409 |
| Au | 17.31088967 | 3.21365835 | 7.99557099 |
| Au | 18.79184082 | 5.66550925 | 7.95273199 |
| Au | 20.20378856 | 8.16852028 | 7.98785938 |
| Au | 18.73412539 | 0.70425439 | 7.94640966 |
| Au | 20.18681541 | 3.16859955 | 7.99495786 |
| Au | 21.65145859 | 5.67562217 | 7.97839868 |



|    |             |            |             |
|----|-------------|------------|-------------|
| Au | 23.07499072 | 8.18452656 | 7.99047968  |
| Au | 23.06412180 | 3.16857902 | 7.95280600  |
| Au | 24.52555313 | 5.69588544 | 7.96323411  |
| Au | 25.95308802 | 8.19850178 | 7.98682788  |
| Au | 27.40181483 | 5.71228812 | 7.96250857  |
| Au | 28.84235042 | 8.19916843 | 7.97354197  |
| Au | 31.71984652 | 8.19241482 | 7.94270731  |
| Au | 20.15308880 | 1.47933796 | 10.35361474 |
| Au | 2.83686427  | 1.47379051 | 10.32935963 |
| Au | 24.50144094 | 4.00342251 | 10.27686814 |
| Au | 5.74199525  | 1.49664316 | 10.31945716 |
| Au | 7.20348042  | 3.99882328 | 10.27291693 |
| Au | 28.84796262 | 6.50060759 | 10.36147494 |
| Au | 8.64300606  | 1.48248237 | 10.31624929 |
| Au | 10.10799553 | 3.99590174 | 10.31054415 |
| Au | 11.55877895 | 6.49342931 | 10.32492005 |
| Au | 33.15411652 | 9.02782467 | 10.29326748 |
| Au | 11.54629692 | 1.50063801 | 10.35650626 |
| Au | 13.00913156 | 4.00611156 | 10.38886059 |
| Au | 14.42877820 | 6.47383379 | 10.24285536 |
| Au | 15.83595641 | 8.98124191 | 10.27597713 |
| Au | 14.43019482 | 1.55178926 | 10.39670482 |
| Au | 15.89032895 | 4.03331760 | 10.44959039 |
| Au | 17.36704761 | 6.46223779 | 10.24887456 |
| Au | 18.73811895 | 8.95158367 | 10.33405822 |
| Au | 17.29460646 | 1.56350980 | 10.32998694 |
| Au | 18.76470866 | 4.01618716 | 10.43542034 |
| Au | 20.24685460 | 6.47965793 | 10.39004099 |
| Au | 21.64440041 | 8.98341363 | 10.37965878 |
| Au | 21.62564398 | 3.99396214 | 10.34377948 |
| Au | 23.10301748 | 6.52347108 | 10.37761221 |
| Au | 24.53061216 | 8.99244231 | 10.38810944 |
| Au | 25.96177732 | 6.51057976 | 10.37583820 |
| Au | 27.40844495 | 8.98205848 | 10.37862659 |
| Au | 30.29085881 | 9.00619354 | 10.34890596 |
| Au | 17.25650719 | 9.78734485 | 12.67568594 |
| Au | 20.16512756 | 9.76298055 | 12.68317932 |
| Au | 4.24189836  | 2.32551670 | 12.67563816 |
| Au | 23.09848668 | 9.79965103 | 12.74211706 |
| Au | 7.18768513  | 2.31163096 | 12.68727546 |
| Au | 8.63723772  | 4.77731661 | 12.71751732 |
| Au | 25.97920455 | 9.75362330 | 12.82503073 |
| Au | 10.05239037 | 2.32237195 | 12.71351454 |
| Au | 11.52865084 | 4.83376036 | 12.78225686 |
| Au | 13.08614390 | 7.35253800 | 12.62193880 |
| Au | 28.81247208 | 9.78970711 | 12.80796787 |
| Au | 12.91377165 | 2.34455820 | 12.82031847 |
| Au | 14.38901584 | 4.80364409 | 13.00889034 |
| Au | 15.94020572 | 7.17859133 | 12.55472345 |
| Au | 31.69621924 | 9.87613479 | 12.74857008 |
| Au | 15.80622338 | 2.34592722 | 12.95906591 |
| Au | 17.26794542 | 4.76347892 | 13.06442319 |
| Au | 18.76511612 | 7.19400771 | 12.79379600 |
| Au | 34.60052677 | 9.90783851 | 12.65149280 |
| Au | 18.70223725 | 2.34629149 | 12.87760270 |
| Au | 20.18568197 | 4.80274460 | 12.92740072 |
| Au | 21.63829751 | 7.27947876 | 12.95207542 |
| Au | 21.55743220 | 2.32750792 | 12.76588793 |
| Au | 23.05457119 | 4.83769154 | 12.72333322 |
| Au | 24.49779987 | 7.29889815 | 12.99893829 |
| Au | 25.91660670 | 4.77772905 | 12.69944223 |
| Au | 27.38226581 | 7.26850181 | 12.84229035 |
| Au | 30.33181612 | 7.34509198 | 12.68685082 |

|    |             |            |             |
|----|-------------|------------|-------------|
| O  | 33.89788196 | 7.93708953 | 15.01625582 |
| O  | 12.82806830 | 5.17448169 | 16.19030909 |
| O  | 30.73579700 | 7.20612489 | 15.09388006 |
| O  | 9.77725590  | 4.30814514 | 15.91840340 |
| O  | 27.61554148 | 6.52811650 | 15.32196704 |
| O  | 6.65302106  | 3.48901620 | 15.67704149 |
| O  | 24.52179017 | 5.60901864 | 15.79285359 |
| O  | 23.74848885 | 2.61253519 | 15.51353082 |
| O  | 21.41588014 | 4.76267154 | 15.70643603 |
| O  | 20.60529168 | 1.76231463 | 15.91860940 |
| O  | 18.28423744 | 3.93083967 | 15.89018497 |
| O  | 17.43371121 | 0.89844155 | 15.84725969 |
| O  | 15.18394657 | 3.09511282 | 16.28009120 |
| O  | 14.37411243 | 0.07436057 | 15.69578422 |
| O  | 12.16639870 | 2.21482177 | 15.30219606 |
| O  | 28.56326707 | 9.33815355 | 16.19609068 |
| O  | 8.98817014  | 1.33979357 | 15.42582730 |
| O  | 25.37069783 | 8.53862785 | 16.41547428 |
| O  | 5.83602598  | 0.45392331 | 15.16737174 |
| O  | 22.21018705 | 7.73056298 | 16.47092161 |
| O  | 20.01344497 | 9.68172081 | 15.09048878 |
| O  | 19.10998315 | 6.92666563 | 16.29396459 |
| O  | 16.87332546 | 8.90482867 | 15.03077038 |
| O  | 15.97302840 | 6.14821704 | 16.22681089 |
| Zn | 12.32843339 | 6.70798861 | 15.30400076 |
| Zn | 14.65165994 | 4.86413335 | 16.16627603 |
| Zn | 29.37228738 | 5.92482143 | 15.27258817 |
| Zn | 11.56419015 | 3.94543558 | 15.61222287 |
| Zn | 26.26692478 | 5.22981848 | 15.34441387 |
| Zn | 8.44319955  | 3.10417884 | 15.48703096 |
| Zn | 23.19590163 | 4.39250522 | 15.36977216 |
| Zn | 5.34606914  | 2.27031985 | 15.22507916 |
| Zn | 20.05710968 | 3.51715805 | 15.58964705 |
| Zn | 22.31811745 | 1.46498988 | 15.33382439 |
| Zn | 16.92532844 | 2.68745923 | 15.81974471 |
| Zn | 19.20943198 | 0.64136043 | 15.49779219 |
| Zn | 13.95841025 | 1.87806436 | 15.68471199 |
| Zn | 33.44357457 | 9.74182542 | 15.22512126 |
| Zn | 10.79638466 | 0.94581156 | 15.34462266 |
| Zn | 30.23692177 | 8.94671792 | 15.56124802 |
| Zn | 7.64422057  | 0.06702910 | 15.43303761 |
| Zn | 27.12736561 | 8.19627382 | 16.00909917 |
| Zn | 21.77299125 | 9.23482295 | 15.51076470 |
| Zn | 23.99322835 | 7.31781498 | 16.21781726 |
| Zn | 18.65097589 | 8.39886598 | 15.29185732 |
| Zn | 20.88925697 | 6.48237645 | 16.08095063 |
| Zn | 15.54099215 | 7.56966634 | 15.11612016 |
| Zn | 17.75314855 | 5.68748204 | 16.07906246 |

### 30/14 Sn

144

Lattice="-4.5891230099 15.8971884307 0.0 -18.3564920396 7.9485942153 0.0 0.0 0.0 22.6689514933"

|    |              |             |            |
|----|--------------|-------------|------------|
| Sn | -20.65105355 | 19.87148554 | 5.50000000 |
| Sn | -18.35649204 | 15.89718843 | 5.50000000 |
| Sn | -16.06193054 | 19.87148554 | 5.50000000 |
| Sn | -16.06193053 | 11.92289132 | 5.50000000 |
| Sn | -13.76736903 | 15.89718843 | 5.50000000 |
| Sn | -13.76736903 | 7.94859422  | 5.50000000 |
| Sn | -11.47280752 | 11.92289132 | 5.50000000 |
| Sn | -9.17824602  | 15.89718843 | 5.50000000 |
| Sn | -9.17824602  | 7.94859422  | 5.50000000 |
| Sn | -6.88368452  | 11.92289132 | 5.50000000 |
| Sn | -6.88368451  | 3.97429711  | 5.50000000 |

|    |              |             |             |
|----|--------------|-------------|-------------|
| Sn | -4.58912301  | 7.94859422  | 5.50000000  |
| Sn | -2.29456150  | 3.97429711  | 5.50000000  |
| Sn | 0.00000000   | 0.00000000  | 5.50000000  |
| Sn | -18.36418399 | 21.19350184 | 6.50390787  |
| Sn | -16.07344207 | 17.20583733 | 6.59598706  |
| Sn | -9.18117689  | 5.29509915  | 6.52229210  |
| Sn | -13.77077637 | 13.23903938 | 6.56306414  |
| Sn | -11.46943304 | 17.21848153 | 6.53230923  |
| Sn | -11.47762458 | 9.27428277  | 6.49669257  |
| Sn | -9.18009493  | 13.24534419 | 6.59615492  |
| Sn | -2.30222561  | 1.31840783  | 6.49990314  |
| Sn | -6.88850917  | 9.27179170  | 6.47084071  |
| Sn | -4.59454149  | 13.23723436 | 6.54639101  |
| Sn | -4.58867512  | 5.30214073  | 6.39414640  |
| Sn | -20.65428414 | 17.22542531 | 6.55608993  |
| Sn | -18.35771964 | 13.24661281 | 6.51171549  |
| Sn | -16.06454993 | 9.26602009  | 6.50264978  |
| Sn | -18.27634798 | 20.96106696 | 9.40497208  |
| Sn | -15.98673729 | 17.08857953 | 9.51731903  |
| Sn | -9.21382906  | 5.01586294  | 9.41437688  |
| Sn | -13.67321694 | 13.08583313 | 9.47083564  |
| Sn | -11.59961236 | 16.98602879 | 9.44869558  |
| Sn | -11.43091185 | 9.07072708  | 9.36691364  |
| Sn | -9.10366640  | 13.18897257 | 9.51764899  |
| Sn | -2.14979095  | 1.02799305  | 9.40747150  |
| Sn | -6.82134385  | 9.15951143  | 9.35864012  |
| Sn | -4.66086867  | 13.07900364 | 9.46392835  |
| Sn | -4.48484723  | 5.17793770  | 9.26363788  |
| Sn | -20.57303541 | 17.12968419 | 9.45887895  |
| Sn | -18.20962079 | 13.04536796 | 9.39597320  |
| Sn | -16.06677273 | 9.11066095  | 9.40415878  |
| Sn | -20.62069752 | 22.30547579 | 10.25820485 |
| Sn | -18.29264672 | 18.37360160 | 10.60009346 |
| Sn | -11.44069654 | 6.44277432  | 10.42894545 |
| Sn | -15.97492490 | 14.41353490 | 10.47920542 |
| Sn | -13.73859861 | 18.38272867 | 10.72794353 |
| Sn | -13.73192403 | 10.39197640 | 10.35142089 |
| Sn | -11.43132654 | 14.39779329 | 10.63709487 |
| Sn | -4.56120221  | 2.42669816  | 9.91190103  |
| Sn | -9.15370376  | 10.46457532 | 10.30640179 |
| Sn | -6.83134940  | 14.39353447 | 10.77567460 |
| Sn | -6.87556661  | 6.43717327  | 10.10306109 |
| Sn | -4.55054115  | 10.44311729 | 10.50388285 |
| Sn | -2.16686725  | 6.46975653  | 10.26862731 |
| Sn | -18.32984035 | 10.42867815 | 10.51355490 |
| Sn | -20.31879641 | 22.42515638 | 13.11298751 |
| Sn | -18.12364150 | 18.25834207 | 13.52596053 |
| Sn | -11.57153927 | 6.36145832  | 13.31380206 |
| Sn | -16.19401288 | 14.35952610 | 13.35766747 |
| Sn | -13.75486526 | 18.58235919 | 13.68691473 |
| Sn | -13.74448070 | 10.39668857 | 13.23114918 |
| Sn | -11.48919248 | 14.35808520 | 13.59580416 |
| Sn | -4.28769019  | 2.67319460  | 12.71784511 |
| Sn | -9.49331373  | 10.22136697 | 13.15553147 |
| Sn | -6.88746798  | 14.34860299 | 13.78590293 |
| Sn | -6.90699103  | 6.69529991  | 12.94360320 |
| Sn | -4.60094610  | 10.37058352 | 13.42440655 |
| Sn | -2.10853115  | 6.40904841  | 13.13492869 |
| Sn | -18.28745681 | 10.49372700 | 13.43318593 |
| Sn | -20.55588731 | 19.74378219 | 14.05735981 |
| Sn | -18.40974510 | 15.63766763 | 14.61166949 |
| Sn | -16.09847206 | 19.83233737 | 14.83385640 |
| Sn | -15.92105644 | 11.73228251 | 14.41564837 |

|    |              |             |             |
|----|--------------|-------------|-------------|
| Sn | -13.89530221 | 15.77394726 | 14.32822462 |
| Sn | -13.64819315 | 7.86057888  | 14.60080140 |
| Sn | -11.52815019 | 11.64084756 | 14.56012319 |
| Sn | -9.20685485  | 16.06358190 | 14.00876254 |
| Sn | -9.22462205  | 7.62789266  | 14.28850050 |
| Sn | -7.15870858  | 11.47139756 | 14.17098447 |
| Sn | -6.57056391  | 3.99956102  | 13.81665441 |
| Sn | -4.46486941  | 7.61981740  | 14.05363060 |
| Sn | -2.27518011  | 3.84306406  | 14.36186528 |
| Sn | -22.69799696 | 23.60985791 | 14.12644111 |
| O  | -15.05836693 | 18.66458292 | 18.10577337 |
| O  | -12.15379036 | 17.95042605 | 17.09142364 |
| O  | -14.20984180 | 15.61261603 | 16.61288320 |
| O  | -11.29599355 | 14.81900398 | 17.33880538 |
| O  | -9.23677715  | 16.99396036 | 16.08181735 |
| O  | -6.41566220  | 16.31212793 | 17.62016974 |
| O  | -13.29937854 | 12.35482699 | 17.47619577 |
| O  | -10.29441568 | 11.57493771 | 17.86585823 |
| O  | -8.38599077  | 13.92706710 | 17.09697015 |
| O  | -5.30446139  | 13.13615024 | 17.39252360 |
| O  | -12.43276834 | 9.16389104  | 18.14139160 |
| O  | -9.40043279  | 8.46217411  | 17.69535232 |
| O  | -7.50624907  | 10.87293975 | 16.38684948 |
| O  | -4.61946223  | 9.98078144  | 17.21365066 |
| O  | -20.77842725 | 20.23137997 | 16.25359653 |
| O  | -18.15023102 | 19.50277816 | 17.97850120 |
| O  | -11.48199948 | 6.01020695  | 18.25888394 |
| O  | -8.55952869  | 5.20972703  | 17.34751304 |
| O  | -6.65889849  | 7.57732753  | 16.58486306 |
| O  | -3.92660262  | 6.65192140  | 17.53457394 |
| O  | -20.11758397 | 17.07130325 | 17.32715914 |
| O  | -17.11709257 | 16.31730479 | 17.87212224 |
| O  | -5.75687531  | 4.33855090  | 15.89551676 |
| O  | -3.19442927  | 3.45451986  | 17.80913427 |
| O  | -19.28983696 | 13.85876046 | 17.84073387 |
| O  | -16.20170606 | 13.19205501 | 17.47711139 |
| O  | -18.34883802 | 10.77546374 | 17.31776457 |
| O  | -15.35535901 | 9.89213792  | 17.42885950 |
| O  | -17.37507570 | 7.63709244  | 16.27036285 |
| O  | -14.62972071 | 6.69515792  | 17.79616495 |
| Zn | -13.94210554 | 17.43511927 | 17.31132193 |
| Zn | -7.38318250  | 3.89227442  | 16.87764699 |
| Zn | -13.02502570 | 14.13747554 | 17.15263832 |
| Zn | -10.98319134 | 16.56148670 | 16.80404247 |
| Zn | -8.03081459  | 15.73281221 | 16.92542623 |
| Zn | -1.73833005  | 2.29651480  | 17.64134414 |
| Zn | -12.09262729 | 10.96198324 | 17.83575157 |
| Zn | -10.13979441 | 13.35560386 | 17.39716996 |
| Zn | -7.07511781  | 12.63478808 | 17.06240504 |
| Zn | -5.19253538  | 14.98047088 | 17.22771463 |
| Zn | -11.12040797 | 7.83819961  | 18.09427573 |
| Zn | -9.20807072  | 10.22606580 | 17.18402574 |
| Zn | -6.29445657  | 9.36220013  | 16.68981332 |
| Zn | -4.17324924  | 11.73882637 | 16.90866579 |
| Zn | -19.66577854 | 18.84595994 | 17.15847240 |
| Zn | -17.83830443 | 21.34830098 | 18.01466578 |
| Zn | -10.26230697 | 4.63549157  | 17.89239636 |
| Zn | -8.43116167  | 7.03839530  | 16.89555710 |
| Zn | -5.32521079  | 6.26106261  | 16.32884662 |
| Zn | -3.50042693  | 8.45242719  | 17.31411828 |
| Zn | -18.86480794 | 15.65706009 | 17.45415145 |
| Zn | -16.86251170 | 18.14842418 | 18.01199198 |
| Zn | -4.18910412  | 3.11331250  | 16.20764922 |

|    |              |             |             |
|----|--------------|-------------|-------------|
| Zn | -2.68839821  | 5.28078425  | 17.78397465 |
| Zn | -17.96833717 | 12.59815372 | 17.50837873 |
| Zn | -15.98420767 | 15.00136928 | 17.25518211 |
| Zn | -17.06997094 | 9.50041655  | 16.88483750 |
| Zn | -15.04493941 | 11.72658994 | 17.11485530 |
| Zn | -20.46837265 | 22.21298642 | 16.46687898 |
| Zn | -14.11544501 | 8.51635873  | 17.63514431 |

### 30/24 Pb

156

Lattice="-21.0010714012 0.0 0.0 -14.0007142675 -12.1249742268 0.0 0.0 0.0 22.8118456849"

|    |              |              |             |
|----|--------------|--------------|-------------|
| Pb | -29.75151782 | -9.09373067  | 5.50000000  |
| Pb | -26.25133925 | -9.09373067  | 5.50000000  |
| Pb | -24.50124997 | -6.06248711  | 5.50000000  |
| Pb | -22.75116069 | -3.03124356  | 5.50000000  |
| Pb | -22.75116068 | -9.09373067  | 5.50000000  |
| Pb | -21.00107140 | -6.06248711  | 5.50000000  |
| Pb | -19.25098212 | -3.03124356  | 5.50000000  |
| Pb | -17.50089283 | 0.00000000   | 5.50000000  |
| Pb | -19.25098212 | -9.09373067  | 5.50000000  |
| Pb | -17.50089283 | -6.06248711  | 5.50000000  |
| Pb | -15.75080355 | -3.03124356  | 5.50000000  |
| Pb | -14.00071427 | 0.00000000   | 5.50000000  |
| Pb | -15.75080355 | -9.09373067  | 5.50000000  |
| Pb | -14.00071427 | -6.06248711  | 5.50000000  |
| Pb | -12.25062498 | -3.03124356  | 5.50000000  |
| Pb | -10.50053570 | 0.00000000   | 5.50000000  |
| Pb | -12.25062498 | -9.09373067  | 5.50000000  |
| Pb | -10.50053570 | -6.06248711  | 5.50000000  |
| Pb | -8.75044642  | -3.03124356  | 5.50000000  |
| Pb | -7.00035713  | 0.00000000   | 5.50000000  |
| Pb | -7.00035713  | -6.06248711  | 5.50000000  |
| Pb | -5.25026785  | -3.03124356  | 5.50000000  |
| Pb | -3.50017857  | 0.00000000   | 5.50000000  |
| Pb | 0.00000000   | 0.00000000   | 5.50000000  |
| Pb | -27.97869070 | -8.09140755  | 8.29711534  |
| Pb | -24.48887708 | -8.11072299  | 8.27334745  |
| Pb | -22.71608021 | -5.07495050  | 8.32212523  |
| Pb | -20.96184075 | -2.02731857  | 8.29675062  |
| Pb | -20.99408579 | -8.12981691  | 8.30437555  |
| Pb | -19.24323849 | -5.09418561  | 8.30005049  |
| Pb | -17.48064761 | -2.04875615  | 8.27908238  |
| Pb | -29.72131601 | -11.13836693 | 8.32760463  |
| Pb | -17.49029737 | -8.10633490  | 8.27491576  |
| Pb | -15.75150837 | -5.08588169  | 8.27588933  |
| Pb | -13.99645877 | -2.06652682  | 8.31220304  |
| Pb | -26.24792763 | -11.15918338 | 8.29836470  |
| Pb | -13.98017569 | -8.09831612  | 8.26440131  |
| Pb | -12.23287646 | -5.07629055  | 8.30626247  |
| Pb | -10.49665185 | -2.04871383  | 8.27823649  |
| Pb | -22.75272823 | -11.14836217 | 8.26829533  |
| Pb | -10.46622849 | -8.07724100  | 8.31497495  |
| Pb | -8.72056625  | -5.07055953  | 8.28892813  |
| Pb | -6.98259347  | -2.03668326  | 8.26144632  |
| Pb | -19.23642885 | -11.13529258 | 8.29709689  |
| Pb | -26.20858483 | -5.05478637  | 8.28431987  |
| Pb | -3.46294808  | -2.01550580  | 8.30542746  |
| Pb | -15.71876587 | -11.13193031 | 8.28149579  |
| Pb | -33.20822493 | -11.11732960 | 8.28962687  |
| Pb | -8.82234051  | -7.08795321  | 11.23685213 |
| Pb | -26.32034342 | -7.08710756  | 11.23455457 |
| Pb | -24.57184776 | -4.08558306  | 11.21708199 |
| Pb | -1.80567929  | -1.02719719  | 11.21456520 |

|    |              |              |             |
|----|--------------|--------------|-------------|
| Pb | -22.83188926 | -7.09688659  | 11.24005203 |
| Pb | -21.05552392 | -4.03624431  | 11.19957377 |
| Pb | -19.30269261 | -1.03229403  | 11.25427343 |
| Pb | -31.56075808 | -10.15690023 | 11.23573690 |
| Pb | -19.28847454 | -7.06329619  | 11.20129653 |
| Pb | -17.54403318 | -4.02782345  | 11.23831807 |
| Pb | -15.83417503 | -1.03072284  | 11.27397550 |
| Pb | -28.05994855 | -10.09282790 | 11.20716761 |
| Pb | -15.80861714 | -7.06083701  | 11.16891545 |
| Pb | -14.05145372 | -4.02925226  | 11.18603425 |
| Pb | -12.29472260 | -1.00409291  | 11.20758035 |
| Pb | -24.55884098 | -10.08778877 | 11.21801452 |
| Pb | -12.28352943 | -7.07876230  | 11.18299452 |
| Pb | -10.55213322 | -4.05141500  | 11.22162691 |
| Pb | -8.81141972  | -0.99517235  | 11.16389781 |
| Pb | -21.06299567 | -10.08831015 | 11.16871676 |
| Pb | -7.06579832  | -4.02559327  | 11.20257334 |
| Pb | -5.27478242  | -1.01719484  | 11.18057262 |
| Pb | -17.55067023 | -10.11268635 | 11.20358895 |
| Pb | -14.05136173 | -10.09831296 | 11.20368965 |
| Pb | -29.83067989 | -9.09560228  | 14.10282673 |
| Pb | -26.27079464 | -9.12408574  | 14.05758116 |
| Pb | -24.52463113 | -6.07100241  | 14.08462868 |
| Pb | -22.79719246 | -3.03423586  | 14.07067346 |
| Pb | -22.76093447 | -9.14951815  | 14.09925948 |
| Pb | -21.07692119 | -6.06419777  | 13.93000717 |
| Pb | -19.25328857 | -3.07244224  | 14.07579252 |
| Pb | -17.50141049 | -0.02065216  | 14.13702194 |
| Pb | -19.29771336 | -9.15202857  | 13.92906046 |
| Pb | -17.52830021 | -6.09730384  | 13.99857028 |
| Pb | -15.75881583 | -3.10338366  | 14.14955618 |
| Pb | -14.04809137 | 0.00302808   | 13.94549106 |
| Pb | -15.84125757 | -9.09296481  | 13.93894634 |
| Pb | -14.03756931 | -6.14919076  | 14.04601211 |
| Pb | -12.29657934 | -3.08740908  | 13.95355059 |
| Pb | -10.52165645 | -0.01558743  | 13.98655820 |
| Pb | -12.31130696 | -9.18207160  | 14.07751022 |
| Pb | -10.56115751 | -6.11484276  | 14.07148828 |
| Pb | -8.82635127  | -3.01855186  | 13.95699042 |
| Pb | -7.04572350  | -0.07549697  | 14.03120760 |
| Pb | -7.00490351  | -6.07372307  | 13.96638396 |
| Pb | -5.29241265  | -3.10568670  | 14.05085389 |
| Pb | -3.56937144  | -0.06680531  | 14.03656622 |
| Pb | -20.99659280 | -0.02086596  | 13.95605582 |
| O  | -19.42939651 | -3.81979584  | 17.03481629 |
| O  | -16.67198415 | -5.10889728  | 17.91751331 |
| O  | -14.55783089 | -3.05170008  | 16.85052295 |
| O  | -11.70468637 | -4.20699081  | 17.83610437 |
| O  | -9.17704750  | -2.24695530  | 17.46518056 |
| O  | -6.33747671  | -3.42794421  | 16.79587791 |
| O  | -4.15364235  | -1.39511626  | 17.91600646 |
| O  | -22.39523809 | -2.66777348  | 16.97903630 |
| O  | -19.90428262 | -0.62346703  | 17.08055706 |
| O  | -17.17705958 | -1.84600988  | 18.22378284 |
| O  | -24.19829037 | -7.89872492  | 18.02241216 |
| O  | -21.49681825 | -9.11380819  | 16.85469931 |
| O  | -18.97753450 | -7.11197321  | 17.05675916 |
| O  | -16.10265251 | -8.32009382  | 17.46509867 |
| O  | -13.88637248 | -6.24531249  | 16.72301205 |
| O  | -11.20376213 | -7.44604887  | 18.04766200 |
| O  | -8.83413716  | -5.45022451  | 17.31292545 |
| O  | -26.99312633 | -6.67812795  | 17.06754578 |
| O  | -24.67120352 | -4.65410219  | 17.97576168 |

|    |              |              |             |
|----|--------------|--------------|-------------|
| O  | -21.82671620 | -5.88141662  | 17.32606817 |
| O  | -28.89322880 | -11.93543498 | 17.37760538 |
| O  | -12.05628852 | -1.04496843  | 17.10299258 |
| O  | -23.71756691 | -11.15583420 | 17.79600230 |
| O  | -6.90288416  | -0.19190907  | 16.73199656 |
| O  | -18.63141455 | -10.29320250 | 17.71705129 |
| O  | -15.74250904 | -11.52345774 | 17.27024819 |
| O  | -13.26362738 | -9.49399034  | 16.74877656 |
| O  | -31.69766987 | -10.70570892 | 18.18419067 |
| O  | -29.47564988 | -8.72135176  | 17.04054492 |
| O  | -26.50606031 | -9.87730626  | 16.97025673 |
| Zn | -18.42190342 | -5.36436554  | 17.29473046 |
| Zn | -16.16888217 | -3.33125552  | 17.77087184 |
| Zn | -13.34059597 | -4.46133884  | 17.00420336 |
| Zn | -11.00859226 | -2.52937791  | 17.46907725 |
| Zn | -8.17901765  | -3.74535124  | 16.99437948 |
| Zn | -5.80860007  | -1.66474523  | 17.11744680 |
| Zn | -24.11954542 | -2.91532026  | 17.66474442 |
| Zn | -21.74372079 | -0.92182251  | 16.92073605 |
| Zn | -18.84359613 | -2.09462808  | 17.43133547 |
| Zn | -16.61858993 | -0.08414130  | 17.99008757 |
| Zn | -23.17857552 | -9.39293269  | 17.62882513 |
| Zn | -20.81355412 | -7.37621263  | 16.88945696 |
| Zn | -17.93429074 | -8.60898137  | 17.40028215 |
| Zn | -15.65498087 | -6.53581320  | 17.32317338 |
| Zn | -12.80088605 | -7.71944847  | 17.13577938 |
| Zn | -10.60723222 | -5.70229683  | 17.79485764 |
| Zn | -28.83405525 | -6.97235669  | 16.97742462 |
| Zn | -26.35346657 | -4.95297328  | 17.24132668 |
| Zn | -23.59461908 | -6.15581543  | 17.79791725 |
| Zn | -21.27004528 | -4.15294038  | 17.00357677 |
| Zn | -13.88943619 | -1.30290323  | 16.90202504 |
| Zn | -25.48798390 | -11.41588475 | 17.24106113 |
| Zn | -8.68682745  | -0.47846212  | 17.27895824 |
| Zn | -20.31294378 | -10.54754691 | 16.98608972 |
| Zn | -17.53201669 | -11.78588825 | 17.67601198 |
| Zn | -15.11902407 | -9.80920741  | 16.92827935 |
| Zn | -33.31386597 | -11.01116071 | 17.30810115 |
| Zn | -31.15857046 | -8.96685639  | 17.82371956 |
| Zn | -28.34977239 | -10.20952361 | 17.00772178 |
| Zn | -25.90512959 | -8.14856024  | 17.33147242 |
